# Supplementary material for: The biological knowledge discovery by PCCF measure and PCA-F projection
Source: PLoS One. 2017 Apr 11;12(4):e0175104. doi: 10.1371/journal.pone.0175104 (PMC5388332; doi:10.1371/journal.pone.0175104)
Supplement: S4 File — (XLS) [file pone.0175104.s004.xls]

## Sheet: Sheet1
Additional data file 4
The Human embryo data
AffyID	S9_R1	S9_R2	S9_R3	S10_R1	S10_R2	S10_R3	S11_R1	S11_R2	S11_R3	S12_R1	S12_R2	S12_R3	S13_R1	S13_R2	S13_R3	S14_R1	S14_R2	S14_R3
200606_at	10.4686	10.5875	10.528	10.5017	10.2491	10.0344	10.2936	10.2402	10.1728	9.67367	9.51105	9.28799	8.9133	8.61064	8.76433	8.34307	8.47971	8.17816
200737_at	9.58371	9.84643	9.73015	10.0019	9.67627	9.75124	9.37937	9.05309	9.77582	9.33155	9.09819	8.77484	8.14591	8.56742	8.28492	8.21161	8.34427	8.13645
200872_at	10.7779	11.0676	11.0214	10.2544	9.94115	10.2327	9.70057	9.39127	9.61374	9.36599	8.8905	8.90668	8.74767	8.55214	8.39253	8.90576	8.89382	8.82207
201012_at	7.02577	7.08202	7.00514	6.68882	6.41281	6.37194	6.6141	6.26347	6.20779	5.9434	5.51438	5.40284	5.27937	5.32505	5.44195	5.23781	5.37675	5.37233
201037_at	8.63648	8.85294	8.785	9.00482	8.9449	8.86189	8.42657	8.26866	8.72729	8.07933	7.91752	7.45886	6.93804	7.13086	6.69448	6.41439	6.56139	6.48821
201060_x_at	8.57086	8.97071	8.80455	8.50711	7.85708	8.13276	7.64394	7.51505	7.40518	7.18104	6.93333	7.0102	6.83239	6.75349	6.68362	6.65056	6.63823	6.61233
201061_s_at	9.02177	9.2345	9.13051	8.7402	8.33477	8.62184	7.89978	7.80493	7.81133	7.38136	7.15675	7.19421	7.16968	7.00141	7.01714	7.21762	6.82313	6.93991
201131_s_at	9.29428	9.61879	9.44085	8.68918	8.26587	8.50536	8.04445	7.76334	7.78	7.29569	6.74075	6.65395	6.4351	6.23693	6.19738	6.38676	6.4589	6.37703
201170_s_at	7.8165	7.86056	7.71163	8.23321	7.88951	8.10523	8.13516	7.6129	7.93136	7.7774	6.87743	7.18903	6.8212	6.76802	6.62923	6.45098	6.45729	6.35468
201250_s_at	9.96522	9.78566	9.9509	9.64113	9.45679	9.5281	9.3438	9.04439	9.4752	9.25131	8.75766	8.60387	8.28315	8.60607	7.88778	7.91214	7.97392	7.65097
201349_at	8.88017	9.0017	8.9716	8.4385	8.63477	8.39793	8.0679	7.8357	7.82093	7.3974	7.4504	7.31823	7.29001	7.35712	7.09516	6.88981	7.073	6.94895
201578_at	11.0536	11.0636	10.9198	10.1348	10.1649	9.97368	9.9087	9.63478	9.55769	8.92976	8.82762	8.63074	8.36796	8.04885	8.24189	7.90968	8.06697	7.92213
201596_x_at	11.6761	11.6834	11.6716	11.6081	11.5828	11.4678	11.1972	11.0409	10.9761	10.6424	10.2588	10.1434	9.24659	9.33301	9.07331	8.9232	8.98481	8.84753
201641_at	7.31829	7.74315	7.74389	7.70331	7.82463	7.62205	7.38269	7.47553	7.51068	7.10346	6.7124	6.61378	5.97411	6.10543	6.17204	5.88204	5.90886	5.71738
201650_at	10.8541	10.7575	10.71	10.5154	10.326	10.1906	9.782	9.38312	9.41822	8.88776	8.17259	8.15748	7.17308	7.10584	6.56232	6.68314	6.50759	6.40383
201761_at	8.87622	8.98138	9.03019	9.01536	8.70579	8.86555	8.91555	8.44742	8.56155	8.86086	8.15398	8.58189	7.79778	7.62198	8.07947	7.31515	7.41631	7.78576
201798_s_at	7.64699	7.89919	8.22283	7.50199	7.37796	7.31639	7.22277	7.20888	7.14969	6.82153	6.40536	6.16397	6.29472	6.17061	5.72011	5.92528	6.18907	5.93408
201839_s_at	8.42448	9.13039	9.05672	7.95623	7.68143	7.79323	7.50192	7.12194	7.25687	6.43892	6.0614	6.04107	5.88518	5.45549	5.4809	5.50092	5.38455	4.93753
201848_s_at	9.25871	9.10314	9.20701	9.5036	9.00023	9.32103	8.85805	8.49184	9.27527	8.76721	8.35004	7.96042	7.53336	7.94345	7.43315	7.24504	7.40763	7.18752
201849_at	9.98981	9.95382	9.87629	10.0704	9.66409	10.0042	9.62089	9.22732	10.1424	9.4993	9.19665	8.78539	8.18565	8.84305	8.34975	7.82957	7.85029	7.78258
202071_at	8.23616	8.21392	8.1471	7.59588	7.408	7.61033	7.26998	6.98779	7.20823	6.93237	6.73392	6.70516	6.3106	6.55127	6.31938	6.48407	6.48401	6.3103
202207_at	8.78722	8.85978	8.84847	9.35424	9.08406	9.23326	9.1585	8.84805	8.82271	8.57838	8.11754	8.35719	7.84128	7.44093	7.6906	7.42661	7.2653	7.44235
202464_s_at	8.0935	7.95429	7.9976	8.20994	7.92337	8.28535	8.16147	7.60448	7.96677	7.45874	7.14334	7.19184	6.60044	6.86106	6.70637	6.41781	6.18049	6.50907
202497_x_at	11.1429	11.437	11.1061	10.9607	10.7257	10.7659	10.5102	10.15	10.5392	9.75532	9.07042	9.41882	8.50973	8.73699	7.92047	7.84198	7.78129	7.4744
202498_s_at	9.15621	9.76778	9.75578	9.51157	9.20856	9.10109	8.83228	8.75366	8.94539	8.11863	7.48233	7.83344	6.78367	6.85496	6.74887	5.95755	6.06577	5.77427
202499_s_at	11.5937	11.7821	11.763	11.6216	11.3514	11.2648	10.9929	10.793	11.092	9.92923	9.64719	9.62204	8.52949	8.82886	8.19932	7.61369	7.74452	7.21833
202525_at	6.73811	6.72186	6.65733	6.71102	6.54461	6.4005	6.18555	5.90245	5.99192	5.47453	5.44354	5.31888	5.2178	5.34887	5.00554	4.73039	4.98053	5.00707
202672_s_at	7.05188	7.44066	7.35032	7.53179	7.33144	7.91173	7.95844	7.20286	6.96415	7.25322	6.49893	6.64046	6.15846	6.13246	6.09116	6.20814	5.82478	5.86801
202855_s_at	9.26265	9.03187	9.15692	9.10881	8.72257	8.85365	8.577	8.30538	8.54611	7.80338	7.73682	6.97992	6.34442	6.76176	6.3156	5.6012	5.48827	5.61404
202856_s_at	8.96351	9.01447	8.86975	9.08925	8.62224	8.80417	8.5716	8.0757	8.57701	7.70665	7.41375	6.81678	5.96119	6.38719	5.82386	5.5052	5.38237	5.36297
202912_at	9.37837	9.69718	9.82876	9.28307	8.9471	9.3864	8.80697	8.04022	8.61816	8.29623	7.98927	7.70673	7.28944	7.7083	6.96173	6.85076	6.808	6.76321
202934_at	8.35717	8.17042	8.25471	8.61838	8.48368	8.46573	8.51639	8.18877	8.72196	7.99424	7.74784	7.86073	6.95069	7.50598	6.89426	6.17479	6.73309	6.6383
203304_at	9.91286	9.9234	9.9541	9.9118	9.94033	9.82598	9.52261	9.30841	9.29958	8.75183	8.84738	8.7246	8.39327	8.35403	8.35445	8.52551	8.5145	8.26227
203739_at	7.99684	8.27745	8.03595	7.7206	7.42435	7.48288	7.38293	7.31548	7.32005	6.70872	6.98499	6.71707	6.65905	6.03033	6.56929	6.42749	6.31022	6.14259
203946_s_at	7.14394	7.11863	7.15862	6.85102	6.5025	6.82645	6.46998	6.28063	5.96146	5.50766	5.62958	5.72828	5.01393	5.22446	5.00484	5.07833	5.34724	4.88851
203961_at	7.2418	7.33592	7.22386	7.77701	7.43173	7.16153	7.24397	7.22134	7.01848	6.8515	6.87491	6.80787	6.54385	6.0559	6.14513	5.80224	5.83714	5.72925
203962_s_at	8.04881	8.08383	8.01648	8.59671	8.5202	7.87657	8.16323	7.92542	7.8859	7.52264	7.40837	7.40637	6.55756	6.85808	6.23536	6.2548	6.03495	6.06759
204114_at	9.32004	9.45458	9.49923	9.53415	9.21849	9.35144	9.17662	9.07934	8.84077	8.38583	8.03286	8.07896	7.66809	7.54577	7.61984	7.63124	7.49616	7.49121
204337_at	8.83824	8.81039	8.80467	8.61084	8.56033	8.45282	7.76362	7.39491	7.67418	6.86032	6.56119	6.48639	6.21461	5.90278	6.1312	5.80319	6.27082	5.96778
204338_s_at	7.07354	6.88403	7.06547	7.0379	6.62483	6.55891	5.74276	5.55408	5.67853	4.87581	4.67652	4.65977	4.73551	4.44416	4.40697	4.77416	4.55475	4.55683
204339_s_at	7.789	7.67983	7.61361	7.64117	7.39772	7.43208	6.85509	6.79422	6.63386	6.48635	6.23624	5.90447	6.16307	5.97985	5.94894	5.97566	6.0012	6.0552
204348_s_at	8.90851	8.67148	8.96133	8.97179	8.5582	8.57759	8.22061	7.97888	8.41949	8.08648	7.71533	7.53644	7.33796	7.54481	7.19581	7.23114	7.25674	7.32808
204597_x_at	6.30712	6.2948	6.34334	6.83734	6.13092	6.63797	6.2448	5.8617	6.50058	5.96067	5.59299	5.59862	5.32118	5.67686	5.21391	4.85462	4.87785	4.84925
204637_at	9.44995	9.34789	9.46172	7.65182	7.06741	8.1119	7.20001	7.27749	8.59679	6.31627	7.11441	6.26931	5.47258	6.12792	5.8739	5.68182	5.65176	5.60683
204751_x_at	6.90483	7.27705	6.86837	6.92504	6.58428	6.68439	7.05206	6.40526	6.51129	6.0452	5.61328	5.90052	5.40338	4.98658	5.45356	5.15936	5.20614	5.17841
205044_at	7.26147	7.49496	7.41388	6.94001	6.94361	7.09535	6.97649	6.13698	6.18679	5.7597	5.60718	5.67522	5.2332	5.52557	4.99701	5.1774	5.31831	4.99013
205290_s_at	7.09856	7.63779	7.20865	7.20027	6.41065	6.5809	6.58577	6.12958	6.20762	5.73357	5.43641	5.54359	5.38067	5.18853	5.38466	5.59499	5.57489	5.41062
205328_at	8.18371	8.33664	8.45828	7.13211	6.71724	6.63971	5.90667	5.85591	5.85636	5.57906	5.21422	4.95885	5.06353	5.47653	4.63744	4.67672	4.98423	4.92072
205523_at	8.33742	8.27133	8.56073	8.38394	7.98777	7.89431	7.58923	7.48055	7.08189	6.54577	6.54383	6.29469	5.7319	4.88648	5.53195	4.95052	5.06118	4.76921
205524_s_at	9.88835	10.0333	9.95504	9.94069	9.76329	9.49695	9.30404	9.31393	9.25629	8.61258	8.64209	8.356	7.9534	7.97897	7.7444	7.48115	7.54875	7.24019
205559_s_at	6.99288	7.61905	7.21243	7.57577	6.77969	7.18021	7.07313	6.78133	6.87615	6.15166	5.73631	6.13849	5.68778	5.74948	5.46307	5.22754	5.18477	5.42788
205560_at	5.77007	5.81749	5.63644	6.14493	5.90971	6.0255	5.78299	5.68845	5.59661	5.12354	4.88372	5.02347	4.57838	4.33387	4.38577	4.59841	4.53161	4.42774
206001_at	7.30477	6.86432	7.08477	8.03886	7.49174	7.33803	6.94898	6.80026	6.41605	6.09584	5.67863	5.75724	5.45979	5.43309	5.48881	5.24518	5.53576	5.35432
206424_at	9.26414	9.31426	9.29244	8.50797	8.48069	7.72866	7.71234	7.32744	7.42431	6.53742	6.51533	6.45327	6.29917	6.32889	6.2303	6.33622	6.38526	6.43079
206893_at	8.10085	8.35741	8.19387	8.47437	8.17359	7.97348	7.90465	7.77911	7.4992	6.57008	6.4012	6.50638	6.18323	5.75577	5.93339	5.61869	5.66854	5.42894
207345_at	7.98375	8.09907	8.27247	7.51274	7.18255	7.27573	6.95098	6.94774	7.13028	6.8167	6.48817	6.61678	6.06193	5.82612	5.90628	5.96154	5.91426	5.87505
207542_s_at	7.64644	7.63361	7.60301	6.97071	6.93969	7.0888	6.90235	6.42949	6.38197	6.47626	5.71648	5.76087	5.59917	5.83161	5.72251	5.07402	5.36982	5.19705
207543_s_at	9.19554	9.1861	9.24199	9.20463	9.1115	9.12904	8.97985	8.50489	9.21893	9.00611	8.47687	8.40454	7.80498	8.10822	7.68769	7.30288	7.59347	7.37149
207717_s_at	6.57353	6.62916	6.67254	7.15336	6.56716	6.70118	6.91859	6.589	6.39224	5.69533	5.71157	5.50859	5.08115	4.7809	4.86427	4.65259	4.64902	4.71217
207980_s_at	9.61393	9.8582	9.80894	9.60796	9.41305	9.51674	9.36434	9.05807	8.82466	8.69521	8.33918	8.63698	8.37695	8.08924	8.36018	8.13058	8.09142	8.0653
208190_s_at	6.41812	6.93815	6.57249	6.68361	6.42603	6.5604	6.30468	6.1484	6.04326	5.67123	5.59263	5.5021	4.97066	5.33447	5.30287	5.05126	5.10658	5.14136
208474_at	9.42215	9.50635	9.64884	9.05976	9.00741	9.0672	8.36156	8.31337	8.24349	7.79736	7.7655	7.60146	7.02863	7.27128	7.07916	7.16969	7.19575	6.6383
208949_s_at	8.88692	9.03866	8.79793	8.01035	7.86787	7.92767	8.19187	7.57514	7.62655	7.13387	6.27647	6.75842	6.13237	6.26825	6.3568	6.41954	6.24268	5.84175
209008_x_at	9.88359	9.98782	9.76493	10.1747	10.2512	10.0781	9.78499	9.50802	9.44204	9.15452	8.66346	8.64949	7.9694	7.90556	7.68074	7.57771	7.80839	7.38574
209047_at	8.46315	8.58417	8.4661	7.89484	7.71916	7.98595	7.87834	6.96764	7.17667	6.94516	6.32795	6.62591	6.025	5.87543	5.74152	6.15791	5.94586	5.98324
209070_s_at	8.84794	9.02033	8.94541	8.84695	8.67587	8.5022	8.33171	8.32209	8.03424	8.04716	7.85957	7.71582	7.53568	7.76267	7.32614	7.10093	7.32294	7.46401
209071_s_at	9.13041	9.27069	9.24658	9.01807	8.75691	8.65183	8.64491	8.51166	8.45825	8.0512	7.84116	7.84391	7.58073	7.49992	7.53794	7.51741	7.43746	7.30685
209189_at	8.20486	8.48586	8.52782	8.18887	8.74365	9.64854	9.02591	7.24099	7.44677	8.08567	6.60702	6.9826	5.32238	6.75742	6.69416	5.95631	6.00932	6.16973
209357_at	9.42385	9.41488	9.3425	9.13531	8.7211	9.04805	8.87373	8.44251	8.23648	7.88664	7.58815	8.12989	7.3538	7.3788	7.77102	7.67242	7.17092	7.39215
209369_at	7.51301	7.49493	7.51452	6.55865	6.93837	6.98519	6.45984	6.3911	6.42958	5.75127	5.60431	5.09787	4.80839	4.86854	4.3019	4.49388	5.0725	4.27708
209487_at	8.94225	8.73977	8.75073	8.08978	7.84739	7.96096	7.90633	7.45917	7.56516	7.50001	6.89451	7.4143	6.80937	6.95588	6.94267	6.92145	6.28762	6.78206
209488_s_at	8.6742	8.47368	8.56719	8.5114	8.42993	8.39822	8.15815	7.97567	7.94826	7.70308	7.50909	7.67024	7.30099	7.25488	7.11908	7.13348	7.09434	7.06731
209602_s_at	5.96593	6.32159	6.06881	5.44959	5.28203	5.47486	5.22858	4.92863	4.78473	4.70593	4.31317	4.57786	4.52229	4.01844	4.40001	3.89679	4.17282	4.03161
209604_s_at	9.39692	9.16789	9.45978	8.89244	8.83742	8.53953	8.68923	8.45885	8.34332	7.84615	7.90962	8.09205	7.67248	7.75391	7.66156	7.69876	7.53514	7.41008
209691_s_at	7.49688	7.50393	7.5092	7.50944	7.59765	7.53209	7.41703	7.30958	7.25214	6.74249	6.84671	6.71792	6.19149	5.98649	6.11085	6.04594	6.12198	6.05392
209723_at	7.81455	8.12246	8.10752	7.64046	7.33304	7.59503	7.12532	6.87238	7.13021	6.49855	6.46025	6.19695	6.06538	5.88782	6.07148	5.7181	6.00516	5.83416
209735_at	6.92538	6.74104	6.55657	7.01485	6.53323	6.73737	6.48499	6.29462	6.08002	5.76067	5.79619	5.69674	5.27057	5.2958	5.30461	5.04659	5.3918	5.23027
210002_at	8.24516	8.34568	8.35498	8.10993	7.63699	8.05493	7.77802	7.6611	7.32299	7.02708	6.72591	6.94836	6.66824	5.6657	6.39146	5.83498	5.98817	5.90033
210074_at	10.3205	10.1064	10.1827	9.09344	8.90814	8.88819	7.90582	7.82748	7.53576	7.09351	6.86656	6.94157	6.37888	6.35096	6.27775	6.09354	6.3947	6.25461
210512_s_at	8.58653	8.82428	8.8903	9.19918	8.96409	8.87541	9.11659	8.68139	8.96322	8.58161	8.41917	8.15728	7.82533	7.6175	7.68014	7.09122	7.42927	7.25339
212560_at	7.88206	7.79766	7.88768	7.51321	7.55205	7.37915	6.96229	6.90127	7.04465	6.72898	6.26562	5.99351	5.8949	5.70333	5.86785	6.19425	6.01378	6.15876
212812_at	8.3275	8.40404	8.51191	8.19345	7.83985	7.91134	7.99628	7.65342	7.70157	7.12995	6.75203	6.63226	6.48534	5.98655	6.12331	6.21598	6.13436	5.98477
213506_at	7.49634	7.93982	7.88211	6.97715	5.78998	6.33361	5.41429	4.86786	4.90782	4.37152	3.86576	4.27898	3.85655	3.77401	3.85097	3.5628	3.61106	3.52638
213592_at	8.78766	8.7823	8.86359	8.52782	8.30119	8.11693	7.70518	7.66964	7.39204	7.19315	7.11271	6.89127	6.73669	6.78552	6.80007	6.92212	7.06716	6.87831
213652_at	5.63214	5.80253	5.91014	6.07915	5.80786	5.49941	5.49474	5.20035	5.40306	4.94977	4.87384	4.86367	4.45626	4.28103	4.23395	4.16425	4.19303	4.21817
213661_at	8.62399	8.57539	8.54124	8.87863	8.34673	8.5281	7.73958	7.83217	7.73772	7.28051	7.21572	7.12607	7.01736	6.81107	6.56503	6.96645	6.83078	6.90554
213992_at	7.47273	7.47373	7.74475	7.39606	7.22024	7.15274	6.98056	6.99468	6.95396	6.48616	6.46856	6.26856	6.27234	6.19196	6.22566	5.92135	5.89594	5.98655
214154_s_at	6.39204	6.17416	6.1049	6.27466	6.41142	6.1542	6.01819	5.93982	5.88004	5.42758	5.30262	5.10577	4.80772	4.82775	4.60733	4.63029	4.63658	4.66649
214639_s_at	8.64235	8.61807	8.63488	8.53077	8.08012	8.19658	7.98059	7.78167	7.35542	6.88303	6.52948	6.59428	5.69866	5.6596	5.59022	5.24582	5.3885	5.53481
215726_s_at	8.82428	8.92463	8.85792	8.24841	8.00139	8.24646	7.89812	7.74642	7.81173	7.22341	6.85362	7.33128	7.052	6.75118	7.00872	7.11758	6.97621	7.02723
216236_s_at	11.3084	11.3425	11.4753	11.244	10.9959	10.9041	10.6323	10.4341	10.7203	9.87419	9.32775	9.41586	8.41756	8.84947	8.12419	7.7971	7.79781	7.7521
217356_s_at	11.1063	11.2828	11.0226	11.3802	11.0002	11.0962	10.759	10.3243	11.0206	10.7631	10.3544	10.0701	9.60308	9.86184	9.81384	9.51166	9.46144	9.33708
217739_s_at	6.91712	7.64989	7.20367	7.39639	6.84349	6.97767	7.01266	6.49956	7.28925	6.559	6.10702	6.38148	5.85493	5.96649	5.80357	5.66488	5.76462	5.53757
217744_s_at	7.79325	8.05462	7.93544	7.63283	7.10029	7.43295	6.82448	6.62177	6.77723	5.62913	5.4753	5.78254	5.33224	5.34624	5.24061	5.45218	5.24185	5.18293
217901_at	9.66328	9.74888	9.71754	9.75021	9.45154	9.10138	9.30953	9.02168	8.90604	8.41226	7.64517	7.94159	7.84374	7.43084	7.6734	7.1293	7.41365	7.26349
218186_at	8.3823	8.53	8.34189	7.37396	7.16942	7.24218	6.45257	6.1691	6.53955	6.10218	6.0607	5.81888	5.63138	5.48804	5.42948	5.497	5.576	5.20483
218507_at	9.21942	9.135	9.11093	9.29706	8.90526	9.13647	8.9158	8.72343	8.60686	8.3225	8.3768	8.07358	8.02575	8.02163	7.7267	7.60845	7.74269	7.57091
219474_at	5.48574	5.67927	5.47414	7.11116	6.29744	5.80296	5.49545	5.58182	5.19138	4.84111	4.81293	4.68812	4.52118	4.56547	4.63892	4.34712	4.37932	4.24456
219768_at	6.65929	6.65048	6.60469	5.99322	5.67719	5.7457	5.71599	5.31583	5.31239	5.19915	4.39927	4.62748	4.51133	4.69034	4.75946	4.61805	4.2767	4.46439
219823_at	10.4389	10.6075	10.6978	10.1819	9.89701	9.90563	9.8201	9.65221	9.72132	9.57009	9.19057	9.22495	8.03461	7.75123	7.8489	5.85153	5.75376	5.80437
220138_at	9.48823	9.54614	9.51131	8.92335	9.16675	8.86179	8.54379	8.54915	8.60111	7.61239	7.47197	7.41491	7.02966	6.96236	6.70428	6.50387	6.61693	6.39486
221245_s_at	8.68839	8.65161	8.66933	8.46162	7.97316	8.15784	7.50427	7.45678	7.45999	6.69155	6.74594	7.20255	6.48511	6.42648	6.57348	6.4265	6.52219	6.17738
221340_at	6.73809	7.19528	6.90798	7.7265	7.15936	6.96646	6.34861	6.32703	6.08343	5.4763	5.24725	5.05095	5.21615	5.08134	5.17834	4.88846	5.00236	4.84416
221664_s_at	8.72974	8.98873	8.89952	8.29698	8.12467	8.26035	7.67283	7.52758	7.55741	7.28891	6.77233	7.11288	6.2445	6.85092	6.72106	6.61361	6.7795	6.94235
222088_s_at	11.1183	11.1482	11.1542	10.8347	10.6925	10.6247	10.3808	10.2167	10.389	9.40801	8.81085	9.18861	7.95843	8.5118	7.89649	7.27286	7.45339	7.4744
222108_at	6.77703	7.22349	6.85888	6.91447	6.56546	6.63745	6.37273	5.90278	6.0662	5.53224	5.35498	5.13363	5.28129	5.19895	5.03102	5.27712	5.1548	4.99329
36711_at	5.20484	5.71274	5.75819	5.36293	4.78102	6.43075	5.18863	4.55159	4.75627	4.69163	4.00458	4.27869	3.94047	4.02863	4.08093	3.8959	3.96977	3.92157
200096_s_at	8.79666	8.86429	8.9254	8.53503	8.51132	8.6249	8.28163	8.14242	8.11271	8.13787	7.86363	8.01484	8.06809	7.96352	7.9908	8.24985	8.32233	7.94282
200615_s_at	8.6276	8.61687	8.73105	8.28603	8.0225	8.41368	8.0356	8.03876	7.73104	7.7678	7.77255	7.86241	7.47867	7.79864	7.62052	7.80331	7.91824	7.69809
200632_s_at	7.24671	7.49066	7.43708	7.0143	7.04881	6.80675	7.2272	6.70086	6.91646	6.63519	6.41482	6.61646	6.01815	6.28531	6.25109	6.20077	6.31038	5.90591
200648_s_at	9.16359	9.51869	9.15077	9.21175	9.02939	9.19852	8.80552	8.73273	8.58766	8.43097	8.4477	8.38768	8.2135	8.2581	8.41383	8.24991	8.29555	8.28808
200696_s_at	8.78388	8.96734	9.04581	8.91153	8.73316	8.69079	8.67483	8.35604	8.57311	8.09716	7.84455	7.95306	7.74244	7.80415	7.76188	7.95351	8.14734	7.99519
200742_s_at	6.72747	6.8039	6.77762	6.64846	6.29351	6.67404	6.29136	6.13496	6.289	6.00901	5.68182	5.74678	5.9021	5.80791	5.96533	6.15745	5.99807	5.83676
200782_at	8.87437	8.75061	8.83881	8.41653	8.44209	8.50979	8.3037	7.81627	7.96496	7.75682	7.95827	7.84054	7.74338	7.90232	7.73178	8.03511	8.22318	8.08121
200791_s_at	7.35274	7.44714	7.37406	6.97978	6.86046	6.70516	6.73306	6.70336	6.35952	6.64866	6.52048	6.33212	6.31527	6.10252	6.148	6.31488	6.15804	6.55531
200878_at	8.82508	8.83924	8.75824	7.64424	7.46394	7.81627	7.43261	7.11825	7.07569	6.81559	6.42859	6.54658	6.76268	6.76086	6.98384	7.09618	7.10986	7.20407
201005_at	7.13298	7.14977	7.0933	6.41834	6.16743	6.5114	6.19739	5.77845	5.91591	6.03992	5.80353	5.65403	5.54917	5.6887	5.67743	5.69552	5.80353	5.66903
201021_s_at	9.87728	9.88036	9.8537	9.73234	9.51484	9.604	9.5007	9.38579	9.30566	9.21326	8.95855	9.10996	8.67409	8.68097	8.80483	8.76819	8.64016	8.77754
201130_s_at	6.69443	6.93429	6.85433	6.16037	5.60119	5.72072	5.40905	5.52003	5.34383	5.24023	5.10412	4.93174	4.84286	4.88067	5.02081	4.97801	4.81861	4.74028
201163_s_at	5.76282	5.49061	5.61838	5.01069	4.62156	4.8302	4.52728	4.34316	4.05987	4.13119	4.02145	4.17213	4.45279	3.89909	4.24456	4.64755	4.71917	4.86363
201195_s_at	8.7381	8.69443	8.81684	8.27371	8.49072	8.14657	8.28606	8.11522	8.05104	7.9006	7.99446	7.82783	7.55886	7.66551	7.33644	7.40123	7.29971	7.31095
201200_at	8.15179	7.91202	8.08926	8.06008	8.15005	7.92411	7.74002	7.60049	7.56426	7.12886	7.1746	7.18873	7.08159	6.8797	6.94171	6.95611	6.89396	6.80658
201242_s_at	9.34982	9.26464	9.3044	8.99723	8.34844	8.989	8.82919	8.14257	8.39866	8.05276	7.91249	8.46571	8.21497	7.7763	8.07013	8.16768	8.33609	8.10549
201487_at	8.77135	8.6874	8.83586	8.37603	8.32123	8.38057	8.23043	8.21718	8.00145	7.8318	8.05484	8.17091	8.02707	7.83388	8.02824	7.88797	8.00675	7.87242
201573_s_at	8.17884	8.23779	8.13245	8.17821	7.69308	7.92488	7.71846	7.49764	7.39747	7.43753	7.41287	7.62366	7.26443	7.13945	7.1281	7.22263	7.1442	7.27632
201576_s_at	8.5812	8.69835	8.55167	8.32117	8.06494	8.5236	8.00781	8.00504	7.94047	7.69224	7.91522	7.81317	7.78078	7.67948	7.70678	7.68658	8.02375	7.94573
201590_x_at	11.3702	11.244	11.3322	10.7767	10.8605	10.7663	10.5284	10.4017	10.2215	10.1024	10.233	9.88626	10.0581	10.1606	9.91247	10.4395	10.5239	10.2416
201667_at	11.7998	11.7935	11.6676	11.2581	10.9107	11.0847	10.7953	10.5636	10.477	10.3237	10.3584	10.5245	10.2846	10.1695	10.2692	10.1378	10.2333	10.1927
201688_s_at	5.86908	5.83273	5.79665	5.46828	4.99524	5.15825	4.8807	4.47931	4.787	4.78695	4.54501	4.68069	4.68125	4.70442	4.71978	4.50343	4.45768	4.70096
201690_s_at	6.90097	6.91067	6.94193	6.47149	6.1776	6.3222	5.90905	5.88162	6.23051	5.93833	5.86315	5.74735	5.74377	5.92544	5.7903	5.89611	6.13361	5.59186
201695_s_at	7.53826	7.70806	7.63976	7.25939	7.31137	7.21301	6.7576	6.75598	6.68236	6.51396	6.19665	6.33751	6.17036	6.43498	6.36371	6.47502	6.46567	6.37489
201772_at	8.77019	8.71562	8.80193	8.34997	8.08359	8.37411	8.1314	8.04444	7.8824	7.73755	7.8753	7.94468	7.83874	7.47157	7.7752	7.74349	7.77599	7.64
201850_at	6.49719	6.60872	6.48773	6.4197	6.51623	6.36085	5.9578	5.72708	5.93019	5.91138	5.56668	5.61694	5.60148	5.46104	5.92975	5.8038	5.78044	5.63809
201889_at	7.79235	7.91958	7.92875	7.51315	7.27173	7.0528	7.23756	7.09196	6.89322	6.93064	6.89537	6.92429	7.16532	6.70401	6.68709	7.08064	7.23066	6.98401
201923_at	9.62776	9.73517	9.6333	9.66961	9.30946	9.54378	9.31593	8.89159	8.94879	8.93309	8.73775	9.12607	8.73232	8.84031	8.76933	8.82022	8.9536	8.87861
201926_s_at	6.02015	5.90275	5.8572	5.18257	4.89875	5.09852	4.91322	4.9007	4.89652	4.66923	4.70209	4.74673	4.77528	4.72679	4.51391	4.52773	4.65481	4.67791
201968_s_at	9.63226	9.89205	9.90376	9.84437	9.51361	9.66512	9.28979	9.06732	9.5559	9.22138	9.15521	8.83775	8.70463	8.66329	8.56384	8.72156	8.81269	8.59404
202023_at	7.90634	8.09972	7.90792	8.11967	7.92717	7.92214	7.79324	7.4608	7.64407	7.17623	6.90802	6.97702	6.73117	6.94297	6.81301	6.81424	6.67777	6.6267
202085_at	6.55604	6.93349	6.59781	6.52414	6.27842	6.43352	5.83049	5.79722	5.62658	5.1179	5.29538	5.47197	5.08435	4.71382	5.11981	5.16516	5.30296	5.20124
202087_s_at	8.93801	8.7103	8.73408	8.34555	8.24975	8.3735	8.19592	7.82263	8.14161	7.9999	7.70234	8.05295	7.53767	7.69305	7.64522	7.95388	7.88724	7.91429
202145_at	8.39898	8.26424	8.34596	7.97081	8.15318	7.99296	7.9084	7.84	7.78771	7.65372	7.6734	7.21921	7.42785	7.28115	6.93315	7.17876	7.23413	7.11432
202178_at	6.86219	6.97228	7.06821	6.63671	6.79989	6.76005	6.39404	6.35013	6.31518	6.21598	6.18664	6.13124	5.81253	6.31003	6.2235	6.19347	6.25733	6.29411
202234_s_at	6.76381	7.08506	7.32867	6.60964	5.91201	6.32588	6.36292	6.05053	5.81008	5.73939	5.7539	5.77348	5.45772	5.43495	5.22328	5.06634	5.23097	5.05962
202235_at	5.53549	5.98438	5.80242	5.67567	4.99141	5.32913	5.12308	4.9007	4.81386	4.93734	4.78184	4.82282	4.73504	4.68445	4.80069	4.62392	4.78124	4.53525
202236_s_at	9.89526	9.90725	9.8591	9.44286	9.29148	9.33212	9.1295	9.0246	9.03162	8.93223	9.00913	8.90302	8.91151	8.56329	8.61045	8.48608	8.75086	8.49618
202272_s_at	8.08653	8.21965	8.20075	7.67166	7.27418	7.54257	7.39309	7.18893	7.24831	7.09247	7.0043	7.04951	7.02709	6.8802	7.02494	6.97747	7.10284	6.9806
202330_s_at	8.63592	8.92698	8.82806	8.64312	8.42013	8.49193	8.48061	8.27213	8.02787	7.98986	7.95457	8.10214	7.93063	7.32036	7.73534	7.40843	7.48019	7.34481
202345_s_at	9.8334	9.9194	9.68632	10.1322	9.85552	9.88647	9.50955	9.29614	9.10284	8.8253	8.84135	9.05428	8.65597	8.25521	8.75869	8.67926	8.55751	8.47584
202458_at	7.64657	7.86903	7.65795	8.07132	7.80462	8.17016	7.85788	7.46135	7.37603	7.11674	7.00822	7.04178	6.87678	6.69403	6.66417	6.59564	6.61099	6.51249
202543_s_at	7.25683	7.68198	7.39412	7.08587	6.73113	6.77332	6.88429	6.67261	6.621	6.27333	6.2094	6.61704	6.2859	6.30565	6.31088	6.20831	6.40997	6.24954
202546_at	7.53798	7.45325	7.28563	6.79054	6.37403	6.68938	6.18308	6.1013	6.03062	5.45717	5.57716	5.65196	5.53634	5.10291	5.33769	5.80259	5.67813	5.67173
202598_at	9.20907	9.10042	9.23404	8.91341	9.07944	8.87699	8.62703	8.42004	8.52407	8.38595	8.52814	8.30938	8.22252	8.2754	8.0335	8.27617	8.17957	8.1759
202626_s_at	5.84112	6.45439	6.37459	5.41886	5.77465	5.50452	5.34926	5.11752	5.30061	5.12883	4.91282	5.24646	5.09795	4.88938	5.04588	5.05416	5.02655	5.03951
202643_s_at	6.77934	6.73094	6.57096	6.03477	6.07449	6.04944	6.01741	6.00997	5.84344	5.81224	5.62514	5.45553	5.5962	5.52666	5.59424	5.09812	5.44767	5.47277
202644_s_at	7.56411	7.38719	7.38421	6.96084	6.93658	6.80648	6.65241	6.50548	6.20507	6.25497	6.12854	6.04305	6.2081	5.96846	6.14474	6.06877	5.81714	6.04958
202647_s_at	7.39468	7.6503	7.67229	7.38483	7.26824	7.44639	7.08873	7.05943	6.92389	6.7122	6.65483	6.86028	6.80735	6.64324	6.68135	6.89426	6.64074	6.6757
202704_at	6.05397	6.61106	6.24305	5.67493	5.92053	6.23028	5.75493	5.36578	5.41447	5.36968	5.26209	5.14605	5.2422	5.15635	5.11915	5.39472	5.62745	5.18699
202732_at	8.34067	8.38261	8.36197	8.18199	8.3735	8.20985	7.91969	7.73484	7.69186	7.67298	7.5317	7.70617	7.49655	7.57858	7.54797	7.48632	7.50714	7.55349
202733_at	7.06031	7.51066	7.47979	7.45225	7.00806	7.25876	6.95104	6.33056	7.24105	6.96976	6.56321	6.18071	6.01105	6.09279	5.93021	6.24883	5.91838	6.06625
202790_at	6.69569	6.65543	6.75177	6.70574	6.42065	6.62516	6.28081	5.94014	5.85658	6.42297	6.08745	6.02806	5.875	5.86202	6.01856	5.66352	5.52651	5.80737
202814_s_at	7.20101	7.16332	6.99378	6.65464	6.85801	6.62778	6.60313	6.50392	6.36453	5.93488	6.01984	6.23956	6.27277	6.0924	6.03095	5.95752	5.99595	5.8663
202826_at	7.07006	7.32086	7.00439	6.81633	6.37392	6.53164	6.23423	6.60138	6.19065	6.1651	5.99973	5.79753	5.97142	5.76675	5.6019	5.67554	5.52893	5.65288
202890_at	5.82052	5.82926	6.00731	5.28436	4.80973	4.93602	4.81667	4.75364	4.74329	4.4322	4.32923	4.31582	4.33414	4.39907	4.35203	4.10589	4.27626	4.18194
203041_s_at	6.71211	7.12206	7.07887	6.3992	6.03287	6.39704	6.02809	5.96494	5.92046	5.76173	5.55116	6.0354	5.94346	5.68706	5.75974	5.97236	6.01259	5.99131
203074_at	7.01654	7.17301	6.85306	6.47477	6.61761	6.79102	6.64409	6.43876	6.41605	6.36933	6.23584	6.16758	6.0421	6.00525	6.19399	5.89272	5.76403	6.04805
203256_at	8.76008	8.65158	8.76438	8.4707	8.36338	8.46125	8.33305	8.34688	8.17891	7.88593	7.90356	7.73791	7.7567	7.56096	7.25856	7.34344	7.66252	7.37608
203313_s_at	8.59083	8.64611	8.67405	8.28801	8.13495	8.17274	7.97586	7.85941	7.73771	7.40984	7.80774	7.31291	7.49308	7.19697	7.33542	7.5277	7.59152	7.31128
203325_s_at	8.46853	8.63186	8.72665	8.37017	8.32693	8.47819	8.24522	8.25333	8.15644	7.81619	7.62512	7.60012	7.51679	7.62981	7.74469	7.69382	7.7639	7.63737
203359_s_at	7.49502	7.68775	7.43775	7.8551	7.23702	7.67711	7.38461	7.19897	7.04243	6.84558	6.88304	7.08178	6.40692	6.32332	6.65324	6.48594	6.74066	6.47741
203360_s_at	7.47768	7.49361	7.33484	7.33312	7.08547	7.3691	6.90107	6.74826	6.60526	6.49188	6.84444	6.89433	6.52332	6.24419	6.27989	6.41221	6.68323	6.33763
203372_s_at	6.19526	6.41726	6.47171	5.38269	5.13146	5.24992	5.03526	4.9847	5.00874	4.8142	4.58735	4.65293	4.71013	4.95058	4.72183	4.96236	4.87879	4.82233
203373_at	7.0759	7.18732	7.13708	6.15871	6.07434	6.13174	5.9665	5.88018	5.83912	5.63458	5.58428	5.95753	5.72886	5.9261	5.70117	5.93655	6.0424	5.83746
203381_s_at	10.3637	10.3979	10.4183	9.54186	9.48437	9.46209	9.12297	8.57479	8.76369	8.2211	7.75933	7.75663	7.81049	7.80649	7.81413	8.87585	8.79069	8.70663
203382_s_at	9.43313	9.61146	9.46081	8.73639	8.68539	8.53139	8.21628	7.84657	7.8969	7.18332	6.87262	6.80796	6.98543	6.98698	7.13467	7.87837	7.71699	7.75697
203407_at	6.38357	6.72875	6.52879	6.47227	5.99125	6.1554	6.11426	5.93819	5.68193	5.90626	5.10402	5.43959	5.23789	5.31795	5.18118	5.09387	5.24386	5.18912
203434_s_at	5.82962	5.93705	5.91565	6.14819	5.77893	5.49875	5.90429	5.4391	5.39276	5.12883	4.65152	4.9217	4.89608	4.83184	4.92789	4.53215	4.91509	4.69754
203449_s_at	7.91163	7.82522	7.78977	7.33367	7.32955	6.99975	7.29623	7.03588	6.93147	6.90544	6.89008	6.87569	6.85607	6.65965	6.77608	7.09179	6.95009	6.99825
203453_at	6.62055	6.36144	6.40806	4.99848	5.29554	5.12142	4.97083	4.77382	5.05318	4.82398	4.65935	4.74714	4.59433	4.61818	4.9099	3.99762	4.43743	4.77045
203455_s_at	8.70581	8.83478	8.74778	8.39374	7.70587	8.25855	7.73043	7.25318	7.65464	6.90696	7.02915	7.24367	7.275	6.96883	7.05178	7.24987	7.27727	6.91233
203560_at	8.01651	7.73021	7.91147	7.67474	7.45917	7.66158	7.2809	7.29337	7.30021	7.23029	6.96448	7.17794	7.01833	7.06424	7.07346	7.01954	7.24115	7.19384
203705_s_at	9.01176	9.10347	8.97086	8.55964	8.40735	8.69651	8.4043	8.48452	8.34635	8.25215	8.20804	8.0201	7.85511	7.46329	7.95802	7.44378	7.81056	7.48357
203725_at	7.76361	7.84449	7.78954	7.91206	7.52365	7.85405	7.59474	7.17582	7.07627	7.24562	6.87943	7.13279	7.05447	6.63485	6.87293	7.02448	7.10714	7.01382
203814_s_at	7.16323	7.15635	7.05559	6.94707	6.69705	6.9373	6.40835	6.22982	5.91653	5.94836	6.20173	6.47948	6.06548	6.16774	6.22195	6.08437	6.1964	6.30056
203851_at	7.34349	7.01432	6.98054	7.41194	7.09139	7.04676	6.58975	6.5561	6.55174	6.31684	6.21353	6.02858	5.97364	5.98236	6.1085	6.05186	5.79291	6.00292
203887_s_at	5.85604	5.69221	6.01331	5.59973	5.34364	5.72849	5.26258	5.25245	5.17888	5.04057	4.58292	4.7794	4.55491	4.61888	4.79471	4.3921	4.5682	4.37098
203903_s_at	7.61447	7.84798	7.60782	7.70744	7.0146	7.55377	7.15757	6.89925	6.98696	6.93235	6.78829	6.91057	6.47705	6.61535	6.95087	6.83646	6.94249	6.56645
203917_at	10.3508	10.4009	10.4471	10.279	10.1303	9.86365	9.89369	9.68221	9.70818	9.3557	9.31115	9.28354	9.11845	8.92731	8.95927	9.21545	9.37059	9.0681
203934_at	7.04592	7.65434	7.7058	7.33024	7.12501	7.31607	7.20754	6.90214	6.99684	6.5374	6.77811	6.66105	6.44587	6.25899	6.28812	6.39997	6.37501	6.52727
203973_s_at	6.408	6.42923	6.54347	5.8664	5.89388	6.21437	6.37795	5.83695	6.24687	5.7461	5.70394	5.6446	5.30026	5.62119	5.11353	5.3552	5.5226	5.03944
203988_s_at	6.67547	6.80191	6.87503	6.4504	6.22888	6.41546	6.02486	5.89971	5.77954	5.78298	5.69315	5.67166	5.62467	5.71676	5.77409	5.92832	5.85781	5.96676
203992_s_at	6.93244	7.14375	6.96301	7.04452	6.93969	6.78596	6.90486	6.72562	6.15825	6.26018	6.33131	6.15856	5.89849	5.52775	5.84075	5.71988	5.88005	5.61594
204005_s_at	6.39876	6.15492	6.37473	6.40233	6.28418	6.11147	6.46466	5.9673	5.97148	5.88976	5.43335	5.92588	5.69382	4.75902	5.41822	4.6227	5.43181	4.61943
204079_at	6.707	7.28867	7.13852	6.64777	6.37392	6.57588	6.22901	6.14697	6.13209	6.20475	5.99885	6.02864	5.7342	5.53281	5.89325	5.75471	5.65813	5.82446
204224_s_at	5.59447	6.06314	5.95518	5.59528	5.09558	5.56246	5.1576	4.94707	4.89784	4.72587	4.66553	4.6938	4.90852	4.52719	4.74513	4.87729	5.07746	4.9343
204298_s_at	6.68864	7.17618	6.92791	5.54889	5.78578	5.79206	5.84233	5.06145	5.52578	5.52099	5.04451	5.26184	4.66258	5.16679	4.82019	4.74249	4.92473	4.86877
204304_s_at	8.94253	9.2057	9.05816	8.80923	8.81964	8.65023	8.59737	8.4163	8.17253	7.93845	7.90702	7.91018	8.0614	7.6452	7.88938	7.80055	7.80235	7.74183
204347_at	7.80083	7.7657	7.54909	7.59434	7.30279	7.54392	7.08693	6.78686	7.36842	6.89753	6.73343	6.55435	6.38808	6.95507	6.52596	6.15921	6.29118	6.47846
204361_s_at	5.63346	6.35326	5.7774	5.46251	5.31631	5.24239	5.02636	5.12877	4.90035	4.83217	4.88614	4.62748	4.6516	4.80966	4.77046	4.73225	4.66831	4.49571
204362_at	7.65975	7.68431	7.81714	7.49573	7.18087	7.03575	6.98222	6.93166	6.90101	6.68551	6.41745	6.64237	6.35561	6.38512	6.32228	5.8857	6.41821	6.17456
204437_s_at	5.72206	5.4736	5.65539	5.52928	5.30384	5.32811	5.0834	5.22567	4.98744	4.98778	4.80186	4.79756	4.72593	4.75394	4.69052	4.79238	4.70955	4.6962
204485_s_at	5.39463	5.49287	5.30468	5.18995	5.02264	4.98553	4.85864	4.80665	4.7249	4.62054	4.47984	4.40959	4.37644	4.34027	4.33369	4.12924	4.22397	4.22978
204602_at	6.88249	7.01723	7.01145	6.72146	6.29839	6.58613	6.34667	6.43537	6.14146	6.1197	6.07581	6.01642	6.13226	5.88124	6.11038	6.08622	5.8899	6.11048
204624_at	6.57139	6.68984	6.77947	6.03114	6.00159	6.3307	6.32952	6.13414	6.15755	5.48258	5.51163	5.54514	5.55273	5.73817	5.5586	5.33552	5.66121	5.60785
204720_s_at	6.24139	6.09283	6.32239	6.07005	6.03753	5.96115	5.8696	5.53407	5.51301	5.37988	5.51009	5.45585	5.44741	5.45492	5.16646	5.17351	5.52763	5.4913
204731_at	7.01606	7.63832	7.5984	6.99943	6.66916	7.01767	6.89885	6.53154	6.805	6.38421	6.25563	6.55882	6.20749	5.85089	6.02291	6.3206	6.02122	6.13512
204853_at	6.97288	7.17125	7.02587	6.87133	6.52074	6.73037	6.37766	6.5368	6.35355	6.40156	6.41383	6.34242	6.04369	5.96585	6.13092	6.13284	6.06432	5.72034
204944_at	6.49941	6.68387	6.58991	6.27562	5.7835	6.13668	5.9337	5.60034	5.45395	5.54764	5.4903	5.62836	5.43321	5.22506	5.39827	5.39043	5.698	5.37075
204948_s_at	10.1426	9.98463	10.0355	9.60251	9.28434	9.25693	9.12768	9.26142	9.18825	8.95562	8.67192	8.65725	8.34242	8.42324	8.21458	8.20093	8.21609	8.46415
205048_s_at	7.65613	7.58493	7.57128	7.48045	7.37501	7.53407	7.40094	6.84569	6.867	7.14462	6.64256	6.91988	6.32681	5.7409	6.92771	6.5938	6.66488	6.82959
205206_at	8.14621	8.3859	8.45739	7.70376	7.4164	7.16711	7.21689	6.69577	6.89777	6.66827	6.9541	7.09213	7.14439	6.99073	6.90343	7.0137	7.02568	7.02052
205278_at	5.85297	5.89173	5.84324	5.24743	4.5694	4.48254	4.04747	4.02558	4.0923	3.86915	3.74059	3.79128	3.75601	3.90019	3.73888	3.85148	3.76018	4.02545
205286_at	7.33371	7.34441	7.40134	6.99638	6.41774	6.58019	6.56688	6.37428	6.47212	6.19499	5.79793	6.08508	5.88354	5.79909	6.03735	5.51186	5.75306	5.77976
205289_at	7.73834	7.32085	7.49028	6.07909	6.07588	6.01362	5.95932	5.56592	5.70023	5.43464	5.61413	5.49941	5.28123	5.33229	5.26087	5.24582	5.04276	5.24957
205374_at	8.31918	8.0558	8.29551	7.84017	7.70331	8.14042	7.34329	7.53745	7.21877	7.6262	7.00077	6.86933	7.04566	7.07607	6.8373	6.62464	6.73609	6.85853
205387_s_at	6.76392	7.08358	6.28781	5.47366	5.27696	5.85269	5.2165	5.42582	6.7815	4.57631	5.49245	5.1006	4.68205	4.54515	4.86081	5.08397	4.72218	4.85163
205445_at	6.00771	5.96266	6.12135	7.60448	7.09725	6.96107	5.9622	5.74837	5.50792	5.38959	5.46337	5.08465	5.0076	5.64224	5.36047	5.36148	5.52088	5.4685
205466_s_at	3.88377	4.60661	4.61103	3.91409	3.78761	4.01703	3.66744	3.69477	3.69318	3.50797	3.46263	3.49561	3.58425	3.64039	3.48514	3.52904	3.54094	3.53523
205480_s_at	9.27646	9.57565	9.38355	8.88533	8.68797	8.71568	8.59083	8.37181	8.30449	8.17403	8.00073	8.21634	8.05297	7.72138	7.99357	8.239	8.24204	8.20406
205505_at	6.19203	6.69168	6.59681	6.24654	6.08635	5.71325	5.80456	5.45976	5.53412	5.3214	5.01738	5.29357	4.8717	5.05193	5.01283	4.83514	4.758	4.76255
205534_at	5.44159	5.31337	5.34787	4.78879	5.01329	4.79651	5.05308	4.8043	4.59783	4.64343	4.48221	4.52413	4.42607	4.42775	4.46184	4.37038	4.57924	4.52157
205603_s_at	5.94589	5.80145	5.74177	5.1294	4.85479	4.48447	4.59343	4.39404	4.2964	4.23881	4.39888	4.3371	4.2677	4.22057	4.17502	4.25649	4.15334	4.38148
205923_at	8.20898	8.02197	8.37595	7.98691	8.03874	8.20428	7.81489	7.93978	7.85666	7.49089	7.4436	7.3587	7.27585	7.19852	6.91207	7.02774	7.29366	7.07921
205924_at	5.99252	5.76009	5.96122	5.25646	5.03924	5.04817	4.80561	5.02176	5.09189	4.85158	4.85757	4.50833	4.68678	4.64576	4.70777	4.58252	4.32836	4.45455
205968_at	5.46746	5.46617	5.93809	5.56313	5.58131	5.43308	5.0454	5.09274	5.00003	4.8455	4.81627	5.07859	4.85157	4.8259	4.81053	4.78451	4.76916	4.79124
206012_at	7.94224	8.03436	8.04925	5.64692	5.52339	5.40531	5.91326	5.78788	6.17073	5.7892	5.51098	5.62732	5.50226	5.60707	5.65099	5.50632	5.39417	5.49231
206023_at	7.47427	7.57016	7.53674	7.0441	6.62483	6.99819	6.46206	5.96554	6.21106	5.9674	6.10931	6.09509	6.21108	6.11627	6.41207	6.1455	6.34694	6.15818
206042_x_at	9.35702	9.33174	9.24691	8.92154	8.78436	8.8366	8.66116	8.38645	8.42412	8.1488	8.28837	8.34315	8.47517	8.08433	8.40177	8.49824	8.69213	8.59105
206208_at	6.13841	6.39177	5.88698	5.61228	5.7689	5.55016	5.5841	5.35079	5.37454	5.26173	5.35187	5.05846	5.05849	5.13108	5.12741	5.22559	5.04581	5.04834
206209_s_at	6.91499	7.06469	7.12958	5.46096	5.342	5.24117	5.27073	5.15589	5.13216	4.9834	5.05149	4.82654	4.74889	4.96723	4.97177	4.75443	4.8046	4.82159
206224_at	5.71926	6.02024	5.39177	4.13887	4.32791	3.96393	3.84388	3.88026	3.91302	3.94357	3.92869	3.8149	3.93486	3.91826	3.91709	3.8517	3.91126	3.86198
206286_s_at	7.35359	8.37372	8.21379	4.99635	5.18983	5.25134	5.16018	5.29828	5.13282	5.45567	5.25725	5.21924	5.26983	5.4205	5.2789	5.1933	5.19056	5.22183
206291_at	7.47057	7.62891	7.68805	5.75745	5.34342	5.0781	4.57414	4.15328	4.13353	4.29199	4.58756	4.42581	4.61592	4.64143	4.77269	4.75826	4.5687	4.61322
206332_s_at	6.60576	7.24679	7.00147	7.39972	6.79494	6.30331	6.21096	6.05607	5.7999	6.00591	5.65622	5.60329	5.50349	5.40355	5.63843	5.87601	5.84704	5.88284
206387_at	6.87872	6.6683	6.61053	6.81893	6.58256	6.25671	6.03196	5.90594	5.73704	5.5981	5.11328	5.3894	5.15471	5.53754	5.21048	5.25894	5.0701	5.0732
206390_x_at	8.5006	8.63404	8.62114	8.26789	8.04632	8.21163	7.48392	7.06304	7.48398	7.22857	7.10303	7.07614	7.54395	7.38562	7.17304	7.45286	7.32791	7.1883
206397_x_at	6.42088	6.71818	6.548	5.94086	6.01548	5.74437	5.53805	5.3133	5.63114	5.37233	5.44234	5.3787	5.39288	5.4117	5.27142	5.17048	5.28067	5.21863
206429_at	6.3644	6.45661	6.37518	5.86583	5.47668	5.43187	5.43868	5.43265	5.46381	5.42758	5.16518	5.09203	4.99969	5.46414	5.21683	5.08713	5.15176	5.197
206432_at	6.84287	6.94344	7.05184	6.45069	5.6396	5.61838	5.83903	5.54228	5.61596	5.29781	5.58675	5.42732	5.3932	4.94971	5.16606	4.6699	4.90981	4.65436
206524_at	7.99449	8.19685	8.05954	7.31927	7.44912	7.00447	7.10357	7.16138	6.98066	6.7233	6.49184	6.45267	6.27689	6.31382	5.96696	6.31603	6.42738	6.27697
206669_at	5.85304	6.20846	5.98058	5.20318	4.97626	4.92485	4.59192	4.66725	4.65719	4.69233	4.65935	4.52914	4.47932	4.57314	4.49069	4.55653	4.50029	4.51379
206670_s_at	5.69434	6.43519	5.93325	4.95739	4.59765	4.40524	4.23902	4.32756	4.44127	4.21817	4.34216	4.0254	4.04042	4.17041	4.09237	4.08981	4.0767	4.00852
206702_at	7.83831	7.59832	7.70655	7.57095	7.33245	7.61754	7.25374	7.02972	6.93169	7.02626	7.01082	6.97571	6.7969	6.8451	6.62492	6.54465	6.69868	6.65302
206756_at	6.00598	6.41623	5.79569	5.42202	5.31516	5.35251	5.17561	5.00697	5.19573	5.11363	5.0519	4.90488	4.79616	4.91847	4.85814	4.63531	4.62331	4.76817
206857_s_at	8.06583	8.03712	7.81361	7.51361	7.18049	7.22929	6.76316	6.54237	6.61539	6.25497	6.29082	6.43604	6.55983	6.62783	6.60935	7.11616	7.07572	6.8841
206894_at	7.23262	7.15248	6.88236	5.47228	5.58262	5.32764	5.43434	5.18794	5.33186	5.36715	5.57047	5.40063	5.38782	5.41316	5.15597	5.41684	5.65579	5.35302
207016_s_at	8.511	8.38639	8.44233	8.29316	7.88711	7.88264	7.67895	7.66119	7.34456	7.34256	7.25511	7.42792	7.24595	7.22089	7.27239	7.36103	7.55981	7.31497
207197_at	7.74637	8.02827	7.8982	6.17985	5.6896	5.82921	5.21599	5.27854	5.25504	5.21599	4.93355	5.33464	5.84206	5.6874	5.77517	6.53352	6.11758	6.44907
207558_s_at	5.70467	5.7163	5.56131	4.99848	4.67608	5.19992	5.1065	4.62892	4.48328	3.96841	4.093	4.1744	3.9729	3.76469	3.91919	4.06043	4.15643	4.09643
207836_s_at	7.39715	7.38456	7.23313	7.22365	7.11504	7.11834	7.24509	6.88178	6.93682	6.5129	6.4422	6.2555	6.14023	6.15195	6.28841	5.84119	5.6317	5.83346
207843_x_at	8.97805	9.3038	9.24881	8.80356	8.64891	8.90381	8.50948	8.38805	8.39193	8.06252	7.9544	8.18369	7.81779	7.66253	7.80603	7.8584	7.89949	7.96256
208029_s_at	11.135	11.1734	11.3366	11.1807	11.1196	11.1067	10.9975	10.9182	10.7595	10.4789	10.2981	10.4355	10.0757	10.0561	10.0982	9.91176	9.96385	10.0332
208248_x_at	9.94242	10.0633	10.0137	9.83565	9.73046	9.75135	9.58249	9.4858	9.34802	9.30023	9.36522	9.02293	8.95909	8.85279	8.99106	9.0818	9.12587	9.12913
208286_x_at	8.99815	9.48589	9.25378	7.26049	7.3447	6.94824	6.88231	6.95263	6.86301	6.9733	6.92181	6.69828	6.67744	6.94472	6.90563	6.87199	6.45436	6.74885
208456_s_at	7.32803	7.14714	7.10358	6.65052	6.43106	6.57409	6.43818	5.68979	5.92035	5.97354	5.8305	6.01434	5.42306	5.30955	5.41957	5.34821	5.51331	5.425
208621_s_at	8.39066	8.4719	8.44805	7.77594	7.79251	7.76066	7.69486	7.502	7.29537	7.35629	7.03869	7.31049	6.95325	6.99313	6.77113	6.90117	6.84581	6.84213
208622_s_at	8.88548	8.81507	8.81187	8.37603	8.2764	8.36376	8.30084	8.18222	7.96832	7.72959	7.77389	7.75701	7.53906	7.36872	7.34189	7.20311	7.47724	7.22344
208623_s_at	8.853	8.64076	8.84437	8.15519	8.13381	8.42415	8.11853	7.91863	7.69696	7.40429	7.6104	7.68932	7.47631	6.97253	7.19904	7.33473	7.39745	7.04727
208650_s_at	10.4558	10.4512	10.4756	10.0371	9.7985	9.95682	9.62763	9.51874	9.27689	9.23732	9.10003	9.32609	9.18012	8.63552	9.20974	9.07126	9.17041	9.1933
208690_s_at	9.98473	9.99629	9.89502	9.80493	9.57103	9.62449	9.19378	9.18945	9.21852	9.00017	8.6591	8.63805	8.29993	8.34371	8.39242	8.45587	8.4974	8.21639
208702_x_at	10.0169	9.45082	9.87638	9.30185	9.47782	9.39033	9.20305	9.07413	9.01368	8.98103	9.00257	8.92558	8.70657	8.63208	8.469	8.68938	8.80204	8.79
208703_s_at	9.39005	9.28773	9.29962	9.06873	9.12532	9.00556	8.83433	8.62691	8.51551	8.57343	8.28166	8.40065	8.13249	8.01964	8.05151	8.17398	8.22605	8.22606
208736_at	8.66021	8.97695	8.92854	8.55468	8.28346	8.73412	8.46014	8.0836	8.0451	8.03938	8.01075	8.25995	7.97666	7.80217	8.11805	8.04536	7.86165	8.24297
208767_s_at	11.4335	11.3391	11.2952	11.3677	11.1375	11.1767	10.924	10.9771	10.7321	10.7335	10.4845	10.5083	10.2708	10.0652	10.1528	10.0369	10.0999	10.1309
208812_x_at	8.763	8.54366	8.73018	8.37477	8.3114	8.52671	8.07393	7.85614	8.14201	7.7872	7.70245	7.87182	7.80573	7.57001	8.07974	7.91502	7.70795	7.76633
208816_x_at	8.88357	9.07861	8.94616	8.60829	8.26639	8.66223	8.32021	8.27505	8.20575	8.24648	8.18498	7.98103	7.96726	7.96532	8.10164	8.21163	8.16619	8.09198
208899_x_at	7.93726	8.08059	7.93373	7.68504	7.75468	7.67983	7.37601	7.27297	7.17135	7.12125	7.20238	7.18544	7.12965	7.01758	7.1548	7.40588	7.32917	7.34313
208965_s_at	5.57514	6.09859	5.62895	6.13377	5.48422	5.03797	5.3193	5.07391	4.96675	4.66359	4.52348	4.74134	4.37982	4.61871	4.69282	4.89756	4.49619	4.57823
208966_x_at	6.97561	6.90276	6.74992	7.33679	6.80991	6.09761	6.10959	5.8091	5.39954	5.76181	5.46698	5.65128	4.89101	5.45428	5.13521	5.23702	5.50973	5.52192
209016_s_at	5.4533	5.60105	5.54092	5.27586	4.92598	5.10372	5.0261	4.91229	4.64351	4.57352	4.53691	4.45007	4.28199	4.43037	4.31299	4.42724	4.38599	4.27905
209027_s_at	7.87754	7.94926	7.83101	7.43414	7.37099	7.53139	7.30298	7.0904	7.12218	7.07513	7.10566	7.00592	7.05837	6.61349	6.73944	6.70356	7.03022	6.80093
209048_s_at	8.79096	8.81937	8.72223	8.48936	8.38665	8.29523	8.17368	8.25589	8.21122	7.84479	8.17142	7.96185	7.98827	7.88968	7.98743	8.04492	8.18499	8.04123
209130_at	7.45555	7.60206	7.49399	7.1769	6.83654	7.16588	6.85776	6.72477	6.75736	6.40404	6.35758	6.58792	6.60123	6.10496	6.53926	6.74101	6.66947	6.48243
209209_s_at	7.95375	8.23579	7.87616	8.08731	7.84082	7.70168	7.67514	7.36122	7.26431	6.9848	7.11441	7.51388	7.33573	6.93318	7.04064	7.23895	6.97738	6.99578
209210_s_at	10.0016	10.0799	9.99022	9.79703	9.5878	9.51796	9.38277	9.21278	9.01635	9.00012	9.20242	9.23794	9.20298	8.96825	9.03938	9.31701	9.36238	9.14002
209238_at	7.50374	7.7249	7.85107	7.62089	7.36246	7.24968	7.15612	6.77836	6.91167	6.69749	6.42645	6.4619	6.34531	6.36575	6.30817	6.21449	6.30786	6.09824
209267_s_at	7.57493	7.74145	7.68718	7.48405	6.91706	6.99716	6.40644	6.21091	6.38585	5.70916	5.76862	6.67539	6.29499	6.41793	5.90209	6.29994	6.43658	6.41049
209307_at	5.70677	6.18983	6.0879	5.74147	5.16874	5.37649	5.67535	5.46821	5.4184	5.2143	5.19953	5.17499	4.98934	4.65504	5.03107	4.94344	4.89011	4.90815
209366_x_at	9.36506	9.4191	9.3301	9.08004	8.92631	9.10191	8.82202	8.56058	8.55362	8.27394	8.11618	8.36504	8.01562	8.06445	7.9494	8.11016	8.20882	8.31497
209448_at	5.66252	5.75224	5.49212	4.82331	4.72769	4.77227	4.67408	4.54095	4.47164	4.47182	4.63799	4.42208	4.60241	4.31638	4.5703	4.50399	4.49848	4.47355
209457_at	6.5337	6.4801	6.57716	6.4743	6.27776	6.34503	5.96998	6.02652	5.78464	5.70274	5.63065	5.77713	5.82622	5.78836	5.87256	5.64579	5.88948	5.86725
209679_s_at	7.69551	7.71902	7.53439	7.27915	7.10531	7.1391	6.73665	6.68866	6.70437	6.75805	6.49617	6.38941	6.3568	6.49537	6.18945	6.26491	5.98837	6.19162
209771_x_at	12.5445	12.2413	12.3941	12.0518	11.8816	11.9439	11.8857	11.7299	11.551	11.537	11.6565	11.6692	11.588	11.4814	11.518	11.5873	11.6849	11.6232
209772_s_at	10.8111	10.7281	10.7217	10.2569	10.0498	10.1153	9.78523	9.73055	9.65163	9.44481	9.49562	9.39817	9.36244	9.24984	9.43953	9.27194	9.42269	9.30834
209781_s_at	7.43272	7.30757	7.418	7.15381	7.16338	7.29263	6.92542	6.78041	6.55865	6.27548	6.52613	6.53969	6.47775	6.32025	6.44405	6.73243	6.57924	6.48616
209848_s_at	7.3416	7.54294	7.40456	7.31317	7.29179	7.2884	6.83128	6.47489	6.71699	6.47435	6.709	6.30634	6.52367	6.39051	6.45097	6.74013	6.72304	6.77972
209864_at	6.16346	6.07012	5.80635	5.47778	5.31265	5.40202	5.2694	5.097	5.20968	5.03406	4.95736	5.13831	5.00684	4.87177	4.89601	5.02977	4.68436	5.04343
209900_s_at	7.97656	8.22648	8.1104	7.66134	7.39591	7.47246	7.3308	7.19934	6.98183	6.95697	6.70754	7.12906	6.72536	6.44554	6.80458	6.21998	6.41398	6.38179
210041_s_at	6.38923	6.37726	6.19511	5.95852	5.93253	5.89849	5.97037	5.65895	5.54952	5.32214	5.40364	5.6062	5.42064	5.64642	5.43317	5.53592	5.45675	5.24879
210087_s_at	7.46601	7.75566	7.55876	7.37919	6.9853	7.34241	6.82093	6.88459	6.58291	6.48192	5.97924	6.46878	6.37739	6.09433	6.07008	5.96092	6.05843	5.95261
210102_at	6.06517	5.8456	5.96267	5.14184	5.11747	5.17587	5.19444	4.92996	5.06017	4.82469	5.00876	4.66472	4.93769	4.95385	4.66144	4.76735	4.93505	4.71724
210139_s_at	8.46133	8.52105	8.52224	8.78901	8.43758	8.44799	8.05288	7.84472	7.8448	7.16629	6.9267	7.15542	7.06304	6.91267	7.03698	7.85381	7.91139	7.68171
210258_at	4.19609	4.77912	4.54827	3.75812	3.64101	3.55633	3.56446	3.39594	3.41738	3.28638	3.31613	3.36101	3.31872	3.22217	3.40859	3.28892	3.23989	3.35542
210265_x_at	7.94712	8.02717	7.70765	5.53468	5.589	5.54238	5.1251	5.21297	5.13833	5.09131	5.33054	5.09458	5.1016	4.89413	5.11496	4.96975	4.81134	5.02359
210381_s_at	5.86418	5.58512	5.75039	4.66147	4.81773	4.79432	4.64307	4.78544	4.4646	4.86409	4.62674	4.54537	4.39994	4.43981	4.46526	4.24165	4.41068	4.4525
210427_x_at	11.1124	11.186	11.0793	10.7971	10.7529	10.7259	10.5567	10.3015	10.2257	9.83726	9.94296	9.96526	9.89951	10.0592	9.96847	10.1663	10.2562	10.0593
210495_x_at	11.6098	11.6298	11.6544	11.3262	11.1758	11.1456	11.1458	10.9746	10.7788	10.6283	10.5017	10.6037	10.6138	10.5174	10.5333	10.9042	10.9271	10.8959
210540_s_at	4.86006	5.34842	5.32095	4.71892	4.60614	4.57368	4.49875	4.18792	4.27493	4.07624	4.15592	4.17012	3.96468	3.99144	3.94156	3.94137	3.97964	3.84424
210592_s_at	8.19063	8.67834	8.49426	8.39714	7.99872	8.27344	7.74175	7.34664	7.5768	7.25957	7.17042	7.20311	7.02274	7.12717	7.09586	7.52058	7.4855	7.38414
210653_s_at	6.00613	6.13457	6.07531	6.05658	5.67984	5.88784	5.56744	5.61122	5.41674	5.45551	5.31217	5.44048	5.13688	4.9756	5.29195	5.18547	5.20458	5.22844
210664_s_at	6.3253	6.6546	6.34367	6.21883	6.07894	6.07477	6.20251	5.7903	5.85743	5.71393	5.41613	5.54399	5.11665	5.49963	5.41827	5.56109	5.09831	5.37085
210715_s_at	8.8908	8.99824	8.90519	8.80028	8.62944	8.61937	8.43895	8.03921	8.19815	8.00554	7.68985	7.80026	7.66471	7.56398	7.44586	7.55512	7.59859	7.34709
210754_s_at	6.6135	6.58694	6.56473	5.95201	5.61837	5.92855	5.43229	5.52585	5.63036	5.47638	5.38092	5.43081	5.36315	5.47546	5.42946	5.47299	5.29798	5.36362
210809_s_at	9.66472	9.90067	9.75246	9.24978	9.37778	8.83843	9.68722	9.36854	9.30633	8.7861	8.56805	8.74749	8.93432	8.53427	8.71872	9.10237	9.11932	8.96983
210840_s_at	7.17452	7.18188	7.15801	6.78461	6.75949	6.6193	6.58091	6.79422	6.37396	6.43269	6.09271	6.48232	6.44342	6.30772	6.17302	6.22931	6.29772	6.34946
210868_s_at	6.85254	7.07642	7.05495	7.1865	6.78353	6.92533	6.94301	6.63392	6.47106	6.41541	5.86239	6.58343	6.25212	5.87078	6.15703	5.77553	5.88464	5.56141
210905_x_at	8.30669	8.39219	8.44413	6.32554	6.42029	6.18988	5.86326	5.91307	5.88514	5.82171	5.71234	5.92119	5.68662	5.93617	5.72975	5.84558	5.74803	5.80311
210935_s_at	7.2622	7.29074	7.22702	6.79639	6.97849	6.99884	6.69045	6.55856	6.56423	6.25549	6.50864	6.59452	6.48192	6.29515	6.25426	6.11843	6.44477	6.20995
210942_s_at	6.1619	6.34719	6.38723	6.16173	5.81956	6.09947	5.83193	5.55265	5.67099	5.4349	5.20446	5.03104	5.18984	5.18149	5.09993	5.06572	5.15676	4.69875
210973_s_at	9.44988	9.33152	9.31112	9.22838	9.09516	9.00817	8.72716	8.79505	8.72687	8.50028	8.44631	8.36669	8.58914	8.33086	8.45649	8.54579	8.47411	8.34957
211015_s_at	8.44046	8.44437	8.31607	8.0458	7.78177	7.93349	7.95838	7.69637	7.43416	7.45074	7.4376	7.79868	7.52342	7.13203	7.39592	7.38382	7.55113	7.32881
211020_at	5.3653	5.33644	5.52504	4.67139	4.61524	4.89696	4.57862	4.46408	4.32903	4.4262	4.19363	4.27745	4.12845	4.29175	4.24631	4.00683	3.99409	3.995
211267_at	5.85798	5.7854	5.83709	6.08228	5.64866	5.45135	5.24635	5.32317	5.20971	5.20364	5.30529	5.05446	5.02762	5.16515	5.00685	5.02823	4.94417	4.96689
211297_s_at	7.45282	7.5428	7.35718	7.26561	7.13777	7.07455	6.95217	6.59922	6.78567	6.51531	6.54046	6.45723	6.35955	5.84282	5.97461	6.35816	6.10303	6.0868
211404_s_at	8.96929	9.09616	8.90462	8.38609	8.29976	8.40618	8.30453	8.08214	7.94144	7.85903	7.83948	7.93324	7.74515	7.55086	7.59774	7.60195	7.61201	7.48368
211423_s_at	8.47209	8.75695	8.56326	8.38932	8.17255	8.20829	8.03501	8.05765	7.83937	7.71079	7.70116	7.818	7.80622	7.80009	7.63695	7.77968	8.05402	7.82909
211535_s_at	9.28239	9.20634	9.25018	8.86878	8.8433	8.72951	8.64688	8.55409	8.50382	8.20736	8.41153	8.34028	8.35771	7.95712	8.24884	8.31845	8.25583	8.35241
211597_s_at	6.27799	6.51152	6.09632	5.19376	5.15296	5.49935	5.0299	5.22096	5.13369	5.052	4.83191	4.90972	4.8833	4.89142	5.01186	4.74322	4.89154	4.83613
211719_x_at	11.67	11.5268	11.6117	11.0983	10.971	11.1445	11.0191	10.732	10.4536	10.5293	10.4913	10.3569	10.3399	10.2894	10.3063	10.8376	10.7379	10.827
211769_x_at	8.39718	8.4326	8.34825	8.07455	7.89767	7.87085	7.69793	7.30806	7.59155	7.47305	7.2098	7.60332	7.54095	7.45585	7.37429	7.44012	7.56391	7.38651
211778_s_at	6.37439	6.47992	6.56962	5.75681	5.84708	5.7788	5.6056	5.6226	5.59115	5.28046	5.34259	5.06957	5.08875	5.447	5.05728	5.07756	5.17886	5.01425
211864_s_at	7.08123	7.21785	7.37769	6.89188	6.91512	7.1522	6.64071	6.44423	6.44297	6.18105	5.79933	6.11141	5.67203	5.8489	5.75149	5.66012	5.8325	5.90833
211986_at	9.05936	9.12828	9.30155	9.12948	8.99669	8.86779	8.72374	8.67084	8.6127	8.18582	7.89808	7.84053	7.78432	7.76329	7.53019	7.77478	7.94441	7.81688
212063_at	4.94533	5.52397	5.25401	4.05526	4.01935	4.15762	4.17875	3.8561	4.19838	3.88547	3.68521	3.61427	3.53333	3.60956	3.71182	3.86671	3.93308	3.7394
212460_at	7.43361	7.72006	7.39619	7.14764	6.63479	6.9916	6.72549	6.65798	6.43408	6.55721	6.77445	6.59348	6.51306	6.26169	6.51221	6.69122	6.63867	6.46486
212464_s_at	10.9582	11.1264	11.1233	10.9127	10.7407	10.7583	10.7171	10.5463	10.3865	10.0052	9.93173	10.124	10.0936	10.0422	10.0497	10.4223	10.3598	10.1996
212501_at	7.10961	7.27948	6.94487	6.47671	6.32751	6.99426	6.54377	5.91781	6.40143	6.3194	6.16794	6.01467	5.75304	5.78837	5.56169	5.73866	5.85633	5.7156
212568_s_at	7.20969	7.11615	7.21984	7.07542	6.58267	6.90329	6.793	6.86539	6.53254	6.36044	6.2195	6.59742	6.08288	6.01653	6.37882	6.14222	6.18809	6.30187
212589_at	8.42763	8.37345	8.44752	7.90551	7.66646	7.82744	7.50553	7.45543	7.32475	7.28289	7.36588	7.31195	7.07449	6.83245	7.06053	6.96412	7.10104	7.06202
212590_at	7.84351	8.02964	7.71403	7.69652	7.34131	7.60831	7.18713	7.12684	7.14631	6.76632	6.81688	6.67533	6.40648	6.41103	6.58327	6.52693	6.72906	6.29044
212686_at	5.62878	5.30265	5.42758	4.90163	4.66185	4.86713	4.59196	4.52393	4.45451	4.45472	4.26537	4.42459	4.34044	4.17168	4.27276	4.15724	4.25206	4.30663
212747_at	8.057	7.99324	7.99296	7.53457	7.5711	7.50548	7.39358	7.38729	7.1826	6.98641	6.95876	6.8761	6.99201	6.78071	6.90177	7.36517	7.33394	7.33283
212884_x_at	9.64808	9.2379	9.36004	8.92682	8.75109	8.70212	8.42687	8.22058	8.1754	7.82377	7.50454	7.67974	7.91246	7.75301	7.74194	8.22442	8.14573	8.26409
212907_at	7.2703	7.70894	7.55093	7.03002	6.63595	6.54062	6.48388	6.65416	6.41994	6.20763	6.32887	6.5644	6.34921	6.21899	6.49986	6.55949	6.67616	6.33101
213051_at	6.2702	6.16715	6.16722	5.77802	5.55859	5.74191	5.57369	5.75488	5.60383	5.43325	5.6051	5.3051	5.07087	4.98584	4.97867	5.07079	4.90396	4.77521
213119_at	6.96619	6.92193	7.00539	6.48232	6.43013	6.44188	6.23382	6.14863	6.03697	5.71464	6.12984	6.15847	6.15052	6.08402	6.10968	6.0142	6.08076	6.17161
213201_s_at	6.99684	6.97425	6.85661	6.90362	6.61817	6.48643	5.89345	5.89331	6.10462	5.72164	6.06243	5.97758	6.33986	5.94742	5.90871	6.51474	6.4901	6.38544
213308_at	5.04915	5.17108	5.2609	4.71544	4.61226	4.58642	4.39604	4.21697	4.67355	4.24611	4.15907	4.10221	4.20047	4.01204	4.22302	4.15675	4.43731	4.32075
213355_at	5.96255	5.42923	6.58298	5.79754	5.3971	5.73809	5.17384	5.03892	5.00791	4.68796	4.74079	4.74741	4.60628	4.38078	4.57033	4.17642	4.47517	4.54368
213358_at	6.46542	6.66448	6.61283	6.21939	5.94965	5.89735	5.70692	5.75178	5.76236	5.25872	5.64226	5.53229	5.6552	5.63906	5.47273	5.62591	5.68225	5.49845
213379_at	6.76643	6.40669	6.46881	6.43437	6.30307	6.28157	6.02468	5.8435	5.47871	5.46762	5.71421	5.92281	5.84194	5.29727	5.5771	5.80481	5.51997	5.60399
213446_s_at	7.27833	7.95417	7.42883	6.87776	6.64281	6.66868	6.86554	6.81916	6.58406	6.19101	6.08198	6.44012	6.18044	6.37566	6.20702	6.09228	6.11089	5.98464
213503_x_at	10.8598	10.8108	10.8403	10.3691	10.3551	10.3149	10.1404	9.95607	9.86932	9.56417	9.66867	9.50164	9.67941	9.67536	9.59665	9.82319	9.94978	9.73583
213664_at	5.03831	5.4139	5.2819	5.51583	5.15127	4.94979	4.8039	4.51749	4.57917	4.17	4.11605	3.81258	3.53388	3.89154	3.96591	3.79542	3.92759	4.04799
213698_at	6.93565	6.74931	6.71919	6.35115	6.41772	6.34757	6.20625	6.04865	5.87729	6.1584	5.72289	5.84797	5.7441	5.57192	5.69276	5.72173	5.76578	5.60562
213927_at	5.33399	5.68182	5.5653	5.07027	5.03993	5.12728	4.77633	4.72999	4.79266	4.68131	4.63636	4.49922	4.51133	4.4176	4.31467	4.37205	4.543	4.43123
213988_s_at	6.8266	6.612	6.75531	6.51666	6.17097	6.29441	5.89477	5.70615	5.92459	5.83139	5.87604	5.73232	5.71663	5.84514	5.62005	5.87207	5.88089	5.80025
214022_s_at	8.25393	8.15737	8.0488	7.75327	7.61121	7.48185	7.10492	7.08854	7.13651	7.20921	7.01173	6.82383	6.63868	7.06258	6.87021	6.69893	6.53357	6.65624
214039_s_at	11.8137	11.7524	11.7968	11.5481	11.4877	11.4651	11.3451	11.2525	11.1513	10.9811	10.7219	10.8309	10.4744	10.4854	10.5739	10.4624	10.5375	10.3944
214146_s_at	7.47345	7.55662	7.50457	6.90451	6.7268	6.97781	5.82545	4.49651	5.61004	5.75066	5.28286	5.4107	5.76395	5.4039	5.64146	5.79495	5.83334	5.87895
214212_x_at	6.81676	7.17465	7.04791	6.69723	6.68649	6.47986	6.23973	6.16903	6.33221	6.13364	6.25969	6.10452	5.99019	5.97693	5.98517	6.19708	6.28246	6.0575
214214_s_at	8.98496	8.91149	8.83164	8.78789	8.56902	8.78334	8.57375	8.51802	8.15369	8.07051	8.09142	8.33151	8.08074	7.59455	8.1395	8.08307	8.02614	7.8274
214397_at	7.50632	7.58944	7.29525	6.85891	6.66309	6.87215	6.39072	6.55113	6.40638	6.21377	6.40809	6.1971	6.15031	5.89255	5.96609	5.4184	5.7803	5.87516
214532_x_at	9.4281	9.54014	9.44622	7.75143	7.94584	7.52527	7.42724	7.24996	7.50757	7.61236	7.46949	7.28672	7.33718	7.32818	7.24718	7.25265	6.9947	7.4425
214581_x_at	5.7574	5.56731	5.50502	5.27314	4.90981	5.25875	5.22216	5.15984	4.82342	4.63454	4.5698	4.69332	4.82026	4.29379	4.59028	4.63333	4.80918	4.69406
214701_s_at	7.83755	8.20867	8.00391	7.84333	7.84335	7.53865	7.53801	7.4596	7.58782	7.00656	7.05907	6.99584	6.97356	6.93854	6.9192	7.25981	7.07452	6.92492
214875_x_at	9.27596	9.51415	9.51593	9.23928	9.32353	9.14792	9.06305	8.81003	8.76369	8.64821	8.63081	8.75643	8.45779	8.44718	8.26588	8.31968	8.54077	8.44954
215145_s_at	6.60652	6.82696	7.00945	6.63571	6.01652	6.31348	5.86761	5.86502	5.89966	5.8301	5.37161	5.74102	5.38818	5.62561	5.71758	5.74337	5.66877	5.68962
215446_s_at	6.2075	6.33432	6.32831	5.21134	5.32902	5.12151	5.50344	4.805	5.33639	4.92301	4.98734	4.70004	4.64247	4.75347	4.67787	4.74833	4.85503	4.63352
215695_s_at	7.55149	7.44305	7.4521	7.51975	7.29401	7.06575	7.47836	6.81376	6.77753	6.97005	6.6683	7.02368	6.51025	6.21825	6.37816	5.84405	6.09901	6.05208
215783_s_at	5.26794	5.4517	5.29703	5.31012	5.0481	5.34192	4.65335	5.01338	4.78607	4.45697	4.71124	4.50643	4.13085	4.19644	4.29495	4.14306	4.12267	4.27501
215933_s_at	5.26399	5.65195	5.59614	5.32762	5.16825	5.12567	4.83139	4.69966	4.62237	4.55024	4.59766	4.5687	4.44631	4.34097	4.60997	4.81306	4.85978	4.47366
216092_s_at	7.18247	7.2429	7.14429	7.13662	7.01717	6.84422	6.82702	6.76697	6.63026	6.24687	6.21124	6.20248	6.26138	6.39875	6.18687	6.2596	5.95137	6.39887
216379_x_at	12.3676	12.3494	12.3296	12.105	11.9602	12.0157	11.8954	11.7663	11.58	11.4406	11.5516	11.699	11.4745	11.5037	11.5057	11.4887	11.5542	11.3626
216442_x_at	11.534	11.6535	11.6834	11.4394	11.2195	11.3695	11.2878	11.0636	10.9083	10.5925	10.3653	10.6118	10.521	10.5545	10.5996	10.6025	10.8866	10.9678
216526_x_at	8.01761	8.46831	8.43451	8.45333	8.10259	8.2835	7.90081	7.57754	7.88481	7.55773	7.33209	7.64986	7.27373	7.59389	7.89265	7.53228	7.45722	7.38552
216603_at	6.96656	6.88311	7.16386	6.21579	6.56352	6.04346	6.39377	6.11136	6.08221	5.91546	5.67129	5.62209	5.94012	5.80574	5.83976	5.42604	5.49081	5.45062
216604_s_at	7.82012	8.1925	7.92519	7.53832	7.56202	7.3225	7.20842	6.92362	6.67877	6.60443	6.21732	6.24684	6.49566	6.5135	6.28747	6.35184	6.28016	6.34585
216899_s_at	7.21566	7.26037	6.9869	6.66052	5.92826	6.09016	6.00056	5.97533	5.8024	5.71201	5.47083	5.62993	5.0899	5.2603	5.46286	5.37679	5.31343	5.35352
216985_s_at	4.87066	5.09927	5.16995	4.73702	4.63327	4.64213	4.4419	4.39458	4.34913	4.30351	4.31291	4.38105	4.13475	4.25568	4.21191	4.00671	4.20787	4.17681
217057_s_at	6.18869	6.51321	6.17443	5.57428	5.3687	5.32315	5.4067	5.21297	5.07985	5.36263	5.36505	5.13026	5.15732	5.17984	5.22752	4.92052	4.99292	4.76878
217234_s_at	8.49181	8.54566	8.51001	8.2002	7.92929	8.1119	7.86869	7.68259	7.57165	7.36198	7.28068	7.27265	7.09379	6.88775	6.94537	6.93244	6.96196	6.77547
217388_s_at	4.70548	4.48121	4.84082	4.46433	4.30117	4.16949	4.07486	3.86286	3.79618	3.95057	3.69253	3.52676	3.80072	3.72129	3.71466	3.63246	3.90078	3.83007
217763_s_at	8.1683	8.3411	8.20273	8.0107	7.71539	8.05694	7.5372	7.45776	7.41332	7.43865	7.29938	7.52438	7.384	7.22509	7.23575	7.31551	7.19901	7.50092
217794_at	8.96997	8.76347	8.81689	8.31683	8.29667	8.31523	8.04603	8.05551	7.96554	7.80353	7.84304	7.85633	7.69854	7.71471	7.55305	7.68282	7.84635	7.5937
218035_s_at	6.63987	6.49883	6.73953	5.64378	5.62387	5.38652	5.24988	4.93885	5.10948	4.74688	4.55415	4.32813	4.45505	4.69404	4.56468	4.58506	4.37725	4.39844
218096_at	8.33079	8.38803	8.35111	8.05293	7.46445	7.69992	7.5687	7.61062	7.39544	7.39478	7.36154	7.34954	7.24418	7.12755	7.30717	7.15558	7.26106	7.36741
218102_at	7.60069	8.18615	7.88033	8.02883	7.38361	7.57723	7.30422	7.17922	7.23129	6.58191	6.84644	6.94431	6.84964	6.57982	6.61407	6.49061	6.62044	6.20243
218162_at	8.44766	8.47573	8.54302	7.93404	7.8326	7.98306	7.76588	7.48715	7.38545	7.14832	7.107	7.31976	7.27012	7.29111	7.1835	7.90163	7.84202	7.85618
218194_at	8.87726	8.72503	8.80297	8.6968	8.79182	8.5281	8.46856	8.3009	8.22712	8.05809	8.04464	8.03337	7.85801	7.64666	7.69073	7.68483	7.92303	7.76821
218195_at	6.82518	7.12448	7.10727	6.60966	6.39569	6.36941	6.37046	5.90329	5.89922	5.45869	5.40533	5.76226	5.45954	5.09496	5.13157	5.37112	5.4271	5.32648
218258_at	9.07428	9.02571	9.04264	8.89455	8.73618	8.88143	8.68889	8.14547	8.45538	8.3346	8.10889	8.25758	7.80062	7.85395	8.06293	8.16925	7.96519	8.03444
218261_at	7.05762	7.08484	6.93893	6.69575	6.56739	6.27519	6.30079	6.53076	6.24444	6.26468	6.322	5.92494	5.96704	5.99373	6.05022	5.76359	5.70373	5.7785
218326_s_at	8.15524	8.10923	8.15119	7.86152	7.43654	7.6803	7.85449	7.7063	7.40677	7.21341	7.1586	7.41613	7.25989	6.71709	7.13731	6.69061	7.02268	6.80334
218330_s_at	8.44518	8.47846	8.43818	7.64581	7.67601	7.78185	7.57543	7.36334	7.44855	7.23879	7.33388	7.15222	7.28619	6.62787	7.11055	6.56047	7.21237	7.00767
218334_at	8.05918	7.899	7.95175	7.812	7.38042	7.86221	7.54498	7.5442	7.24563	6.94434	7.32455	7.3277	7.08982	6.98564	7.07513	7.16911	7.2148	7.06827
218353_at	5.81031	5.78582	5.56026	6.15163	5.65001	5.31872	5.61	5.36581	5.21393	5.15209	5.07314	4.89734	4.60129	4.59631	4.98726	4.50122	4.95968	4.70096
218538_s_at	5.72548	6.23719	6.08749	5.48197	4.94954	5.55354	5.14593	4.95905	4.90278	4.73868	4.90278	4.77798	5.11056	4.55052	4.78742	4.78799	5.02081	4.65783
218611_at	7.10263	7.41694	7.32477	7.05974	6.62715	7.92493	6.33908	6.00563	5.91964	5.83332	5.54444	5.81903	5.74113	5.4393	5.98002	6.09672	6.20046	5.93454
218622_at	8.40882	8.32506	8.37627	8.01081	7.84465	8.04904	7.73761	7.5173	7.67126	7.66625	7.73273	7.74822	7.48327	7.37608	7.3168	7.41544	7.46473	7.20275
218676_s_at	7.06911	7.17778	7.12768	7.08024	6.88536	6.99998	6.4639	6.5569	6.45979	6.25106	6.4194	6.32805	6.31983	6.24944	6.2512	5.94643	6.14577	5.93322
218696_at	6.23423	6.53159	6.40322	6.00706	5.72303	5.94982	5.75894	5.6376	5.7064	5.5628	5.34883	5.64863	5.50672	5.35237	5.5064	5.62591	5.54335	5.67665
218717_s_at	7.96127	7.79353	7.93489	7.45092	7.33149	7.27592	7.05099	6.87869	7.10709	7.12671	7.12064	6.96707	6.93266	7.01812	6.71026	7.04585	7.04193	6.97176
218728_s_at	7.4655	7.59283	7.44531	7.42765	7.20433	7.25248	7.02045	6.69061	6.85791	6.67563	6.77508	6.74166	6.22457	6.3996	6.30972	6.42475	6.34984	6.14717
218826_at	7.90717	7.68423	7.61137	7.84663	7.6893	7.32926	7.15148	7.37274	7.16737	6.85383	6.7916	6.51377	6.65037	6.42662	6.47567	6.29907	6.20018	6.43151
218885_s_at	5.56624	6.02839	5.99519	5.42732	5.14247	5.72395	5.12741	5.24843	5.02633	4.93412	5.00354	4.74527	4.77255	4.75237	4.92131	4.85466	4.85004	4.79044
219073_s_at	5.59214	6.00085	5.68697	5.62059	5.06948	5.37118	5.43154	5.34814	5.20952	5.27342	4.71053	4.84103	4.65739	4.65564	4.69371	4.71694	4.62303	4.78771
219121_s_at	7.82554	8.06686	8.17481	6.63183	6.43237	6.57448	6.38151	6.36954	6.3033	5.99946	5.72545	5.53072	5.4037	5.76076	5.48101	5.39419	5.40031	5.25139
219165_at	7.37521	7.34881	7.18077	7.10372	7.03034	7.11577	6.96015	6.68712	6.97272	6.77674	6.36054	6.50555	6.20927	6.13831	6.02925	6.09259	6.26542	6.20307
219179_at	8.59504	8.52403	8.6137	8.43327	8.19896	8.04939	8.03782	7.75882	7.96605	7.42909	7.41022	7.65077	7.49333	7.31526	7.65689	7.97227	8.05207	7.99866
219181_at	6.1646	6.513	6.2411	6.30742	5.87642	6.00763	5.69802	5.48639	5.45559	5.1987	5.17766	5.31391	5.17515	5.28078	5.1447	5.05232	4.87312	4.75895
219295_s_at	5.65743	5.85705	5.6934	5.53328	5.24516	5.45523	5.1693	5.00529	4.89966	4.87928	4.9329	4.9508	4.94619	4.99969	4.80627	5.04083	5.14896	5.02417
219300_s_at	6.43046	6.85953	6.62697	6.33242	5.83293	6.10757	5.6732	5.63804	5.39278	5.59369	5.31261	5.51662	5.5015	5.64015	5.57316	5.77265	5.45272	5.8482
219301_s_at	5.28721	5.90924	5.53131	5.35044	4.89875	5.08711	4.82877	4.812	4.78194	4.51353	4.61679	4.67834	4.83679	4.46176	4.75855	4.76703	4.87174	4.78124
219302_s_at	5.15833	5.05923	4.94021	4.67149	4.27995	4.46621	4.14165	4.18589	3.70187	3.76802	3.81927	3.65997	3.75458	3.67229	3.85366	3.77537	4.03399	3.9619
219326_s_at	6.88301	6.95256	7.24183	6.39269	6.55122	6.26534	6.18997	6.2583	6.02867	6.14764	5.63704	5.73901	5.8213	5.67465	5.49695	5.23644	5.12461	5.7695
219327_s_at	7.14325	7.40794	7.19218	7.40738	7.11504	7.26608	7.22682	6.87675	6.92805	6.61509	6.3724	6.49467	5.76464	6.51796	6.15481	6.06067	5.69032	6.36633
219388_at	6.24502	6.21833	6.05254	5.83945	5.65083	5.95829	5.48906	5.37973	5.49205	5.44721	5.45938	5.293	5.07318	5.2432	5.33654	5.22481	4.88339	5.01124
219651_at	5.36006	5.75042	6.00103	5.34846	4.88379	4.95682	4.96141	4.94466	4.78396	4.62228	4.65306	4.8952	4.86117	4.51146	4.79498	4.2866	4.54673	4.41544
219681_s_at	5.04954	5.18529	5.37962	5.11016	4.79472	4.92402	4.54491	4.57231	4.3965	4.33822	4.05334	4.19576	4.09485	4.09296	4.3292	3.95531	3.8863	3.78116
219814_at	5.19028	5.21754	4.87916	4.18338	4.15018	4.03151	4.05332	3.91638	3.87106	3.92783	3.80693	3.93478	3.89984	3.97889	3.92565	3.86429	4.06577	3.81558
219869_s_at	7.48402	7.80787	7.66925	7.44792	7.05471	7.18038	6.61332	6.55435	6.55996	5.9634	6.09941	6.88588	6.46973	6.87159	6.27234	6.46958	6.78714	6.52476
219955_at	8.63089	8.83854	8.94243	8.05291	7.73651	6.89702	7.13637	6.71554	6.4938	6.34064	6.44184	6.52999	6.48492	6.21409	6.03431	6.29201	6.27789	6.17201
219993_at	5.82132	5.88305	5.88513	5.52224	5.1519	5.25665	5.19714	5.31223	4.95724	5.01942	4.88371	4.69022	4.88096	4.91184	4.97597	4.89184	4.63431	4.88377
220094_s_at	7.46373	7.54907	7.26161	7.31097	7.19027	7.25828	7.05281	7.05667	6.8485	6.57022	6.49913	6.87963	6.67517	6.37289	6.54508	6.63783	6.57498	6.52035
220199_s_at	7.60089	7.81356	7.77912	7.45263	7.29949	7.51985	7.4352	7.29114	7.05073	6.8797	7.00419	7.1316	6.62602	6.76359	6.94221	6.74562	6.76995	6.82495
220484_at	5.78073	5.88171	5.65224	5.49316	5.57329	4.84532	4.97486	5.0326	4.95158	4.55417	4.38836	4.39885	4.38158	4.36949	4.32769	4.30809	4.22818	4.19488
220668_s_at	9.21254	9.14949	9.27523	8.26145	8.17524	8.28525	7.98462	7.96987	7.60834	7.49147	7.60519	7.46786	7.61586	7.29043	7.45551	7.31719	7.33041	7.33512
221029_s_at	7.62435	7.0265	7.77115	7.03592	7.22946	7.23625	6.55626	6.52902	6.45712	6.05345	6.30129	6.01534	5.844	6.02934	6.02776	6.10349	6.08359	6.25559
221376_at	5.33401	5.40734	5.62145	6.33095	5.72801	5.52453	5.29091	5.08098	5.04714	4.62653	4.53434	4.67647	4.88066	4.60077	4.79649	4.54081	4.66309	4.60756
221381_s_at	9.5972	9.36552	9.39505	9.11785	8.92008	9.20199	8.85221	8.61775	8.5448	8.51812	8.70105	8.80275	8.77022	8.55459	8.74609	8.5697	8.77358	8.67456
221452_s_at	9.24122	9.25898	9.11795	9.04334	8.80294	9.05938	8.78808	8.5827	8.59193	8.46485	8.26242	8.61361	8.23653	8.38006	8.36308	8.22248	8.16108	8.20545
221471_at	8.10199	7.99766	8.1631	7.65731	7.55202	7.60247	7.21299	7.10149	7.36854	7.07915	6.99883	6.96902	7.01833	6.91267	6.80429	7.11028	7.20315	7.05632
221881_s_at	7.85538	7.89447	7.86227	7.42924	7.35623	7.38209	7.2188	6.96946	6.98555	7.09045	7.08629	7.09476	6.83042	6.79144	6.92273	6.69406	6.73298	6.74249
221933_at	7.89025	8.17286	7.96928	7.51664	7.44816	7.29279	7.6514	7.20643	7.17107	7.04166	7.17172	7.11741	6.92998	6.69784	6.96321	6.79901	6.95383	6.75157
221958_s_at	9.35266	9.39639	9.27582	9.1844	8.87309	9.09325	8.7419	8.60223	8.61985	8.51455	8.46445	8.62539	8.38355	8.15834	8.32058	8.28181	8.44983	8.4341
221974_at	7.18208	7.58404	7.58001	7.10707	7.00572	6.71552	6.67127	6.46194	6.53322	5.94291	5.81842	6.16885	6.31251	5.94371	5.98074	5.87618	6.03363	5.79366
266_s_at	9.78857	9.90116	9.73784	9.48595	9.36936	9.45398	9.39123	9.2326	9.11402	8.91049	8.94546	9.19692	8.86904	8.72655	9.14316	8.83902	8.77291	8.78213
37117_at	6.12155	6.51028	6.34465	5.9946	5.74993	6.03994	5.45594	5.42601	5.61456	5.39262	5.26909	5.31388	4.94578	5.05636	4.9994	4.94414	4.92871	4.58236
39248_at	5.46835	5.48266	5.62634	4.05899	4.20072	4.20318	4.28432	3.83352	3.99973	3.86376	3.6609	3.70844	3.63034	3.73952	3.69597	3.8648	3.83652	3.80622
44790_s_at	5.01431	4.79224	5.02413	4.4976	4.15236	4.26942	4.07619	3.91588	4.00496	3.90555	3.90719	3.93388	3.79751	3.87868	3.82485	3.91379	3.85924	3.81536
200011_s_at	8.4758	8.51908	8.45868	8.19297	8.27755	8.51331	8.22394	8.08813	7.97663	7.74674	7.93704	7.98503	7.78557	7.55054	7.76808	7.48043	7.7312	7.71371
200598_s_at	9.72217	9.72601	9.62549	9.64822	9.66243	9.31989	9.57248	9.30336	9.15421	9.09863	9.02165	9.24482	8.91484	8.96855	8.98125	9.15094	9.08766	9.00791
200600_at	8.4382	8.5981	8.55012	8.51191	8.38659	8.57195	8.35466	8.27021	8.08595	7.83853	8.06999	7.99814	8.07005	7.80611	7.88337	8.07256	8.16357	7.9923
200602_at	7.68371	8.15137	8.16369	8.04084	7.37173	7.98657	7.73447	7.59786	7.73583	7.41777	7.23579	7.30553	7.29745	7.20463	7.44908	7.33197	7.478	7.31844
200629_at	8.0262	8.10102	8.07101	8.08147	7.91278	8.08558	7.93595	7.71289	7.60426	7.52526	7.415	7.73997	7.3866	7.51772	7.48339	7.64957	7.64112	7.53797
200635_s_at	7.81747	7.71395	7.85118	7.87282	7.57035	7.79892	7.49301	7.58171	7.42788	7.18087	7.31257	7.34379	6.99151	7.29844	6.96595	7.07736	7.05734	7.12456
200636_s_at	8.75595	8.75985	8.85499	8.91101	8.57267	8.79014	8.67941	8.59706	8.42629	8.36231	8.18091	8.26553	8.13015	8.02494	8.0972	8.17465	8.14947	8.12783
200637_s_at	7.22845	7.26879	7.20888	7.22988	7.47199	7.2327	7.06839	7.27573	7.05973	6.72397	6.85917	6.72696	6.73914	6.51107	6.21445	6.64984	6.64809	6.41402
200650_s_at	12.0746	12.1693	12.1352	12.3259	12.1753	12.1883	12.1724	12.1296	12.1189	12.0523	11.8777	11.7095	11.5181	11.5223	11.4178	11.2713	11.2603	11.2095
200660_at	8.54922	8.32146	8.36849	8.44765	8.34412	8.41037	8.32928	8.08068	8.14261	7.85225	7.81242	7.81576	7.87696	7.43831	7.79832	7.95663	8.03154	7.93328
200673_at	10.8131	10.6815	10.7059	10.6667	10.4942	10.6619	10.5417	10.3794	10.2849	10.2852	10.1369	10.1845	10.1264	10.0144	10.0913	10.2324	10.2817	10.1875
200701_at	9.50611	9.60855	9.54198	9.72428	9.7687	9.68783	9.50703	9.30969	9.4372	9.17122	8.87118	8.90622	8.5076	8.57853	8.652	8.73868	8.42506	8.52913
200729_s_at	8.50888	8.65561	8.7244	8.46998	8.34847	8.31208	8.3956	8.26174	8.16997	7.78323	7.99978	8.17944	8.03326	7.50493	8.06303	7.97714	8.11659	8.16348
200738_s_at	11.193	11.3051	11.2536	11.3887	11.1424	11.2037	10.8917	10.6816	11.202	11.0706	10.7019	10.3297	9.90512	10.021	10.0118	10.0989	9.98837	9.83791
200743_s_at	8.59756	8.59614	8.50979	8.33359	8.33495	8.48906	8.08847	8.19697	8.20084	7.94641	7.82625	7.85665	8.05136	7.81894	7.89542	7.79111	7.94749	7.82464
200770_s_at	7.81209	7.86682	7.89833	7.83524	7.70459	7.62105	7.60864	7.73637	7.3697	7.24372	7.28189	7.19108	6.82554	7.16104	6.88841	6.74343	6.86423	6.91869
200771_at	9.26972	9.2438	9.32643	9.41701	9.3014	9.33887	9.25332	9.10262	8.99226	8.81476	8.68545	8.81829	8.65397	8.39563	8.47049	8.5899	8.4271	8.63723
200796_s_at	6.60314	7.04297	6.84196	6.58042	6.56227	6.62538	6.48996	6.2086	6.08363	6.11512	5.97355	6.21519	6.1441	5.98321	6.16306	6.07571	6.07001	6.1543
200798_x_at	8.71736	8.91124	8.8302	8.51027	8.42187	8.75461	8.67449	8.28842	8.21921	8.27363	8.31499	8.44404	8.18023	8.06174	8.27523	8.24317	8.25759	8.1796
200822_x_at	11.3915	11.2739	11.4139	11.6288	11.6377	11.5455	11.4714	11.2606	11.5471	11.3604	11.1827	11.0123	10.8374	10.9049	10.6962	10.8193	10.7687	10.7702
200833_s_at	9.42725	9.46155	9.38615	9.28635	9.09973	9.16657	9.09355	8.92041	8.83873	8.7995	8.65328	8.83212	9.0218	8.44274	8.69628	8.93858	8.96362	8.88873
200844_s_at	11.0975	11.1631	11.1328	11.1654	11.0827	11.1194	11.0886	10.8783	10.991	10.9564	10.5737	10.8036	10.501	10.4979	10.6108	10.4122	10.3875	10.4545
200886_s_at	11.358	11.4659	11.4546	11.4943	11.4284	11.3848	11.2555	11.1208	11.1187	11.0119	11.0205	10.809	10.5142	10.6022	10.5907	10.46	10.3413	10.3128
200890_s_at	6.50577	6.89249	6.71924	6.73107	6.40771	6.53381	6.58693	6.25209	6.34633	5.95733	5.74042	6.24308	5.82821	5.86069	6.09368	6.31047	6.27293	6.22926
200894_s_at	6.87387	6.92162	6.9909	7.07173	7.1833	7.21615	6.94207	6.7642	6.78408	6.92793	6.71844	6.92597	6.61284	6.50784	6.4094	6.46426	6.3614	6.40554
200900_s_at	7.77685	7.88021	7.98963	7.69425	7.64767	7.71211	7.43077	7.49538	7.60344	7.39312	7.12411	7.53586	7.32743	7.26037	7.09296	7.13197	7.14394	6.95627
200902_at	8.41957	8.65428	8.64027	8.3995	8.4538	8.60444	8.3316	8.08144	8.26717	7.84585	7.89463	8.10874	7.77895	7.7358	8.05075	7.9407	7.82452	7.8824
200903_s_at	9.53759	9.41272	9.48285	9.61927	9.63257	9.60298	9.5707	9.44071	9.4517	9.35001	9.10041	9.34091	8.96183	8.97959	9.02776	9.01119	8.9555	8.99224
200924_s_at	8.59879	8.40527	8.57465	8.28081	8.26367	8.25158	8.206	7.88367	8.06802	7.98131	7.99611	8.03463	7.89744	7.55865	7.50408	7.60164	7.80952	7.73117
200929_at	8.67821	8.72558	8.67022	8.45184	8.26051	8.48403	8.18276	8.1334	7.98668	7.9226	8.13121	8.00875	7.86052	7.89912	7.84321	8.09324	8.16991	7.87382
200966_x_at	11.47	11.3159	11.4015	11.4872	11.3096	11.2961	11.0974	10.9521	11.2829	11.2407	10.9954	10.7389	10.713	10.5648	10.3911	10.3683	10.4271	10.3273
200974_at	7.14603	7.26816	7.53053	9.2929	9.49413	9.24798	8.99752	8.99908	8.55554	8.06895	8.40872	8.37404	8.12275	7.96574	7.86812	7.70197	7.77185	7.61203
200975_at	9.34933	9.37321	9.2839	9.18202	8.85813	9.24936	8.8716	8.72527	8.59363	8.80795	8.57169	8.8081	8.59231	8.60252	8.56906	8.75212	8.64798	8.71038
200986_at	7.99058	8.12849	8.1398	8.16733	7.84571	8.15358	7.85954	7.78898	7.80163	7.62118	7.28954	7.52542	7.31339	7.21135	7.2415	7.55729	7.29848	7.45435
201013_s_at	10.0511	10.0144	9.97667	10.136	9.96962	10.0246	9.93281	9.91301	9.85683	9.83435	9.73429	9.62811	9.46006	9.48403	9.43046	9.366	9.37253	9.3162
201014_s_at	10.2417	10.1731	10.1046	10.0294	9.83101	9.89945	9.77711	9.71142	9.72925	9.72112	9.43511	9.64464	9.27098	9.01904	9.17365	9.04168	9.07309	9.12835
201015_s_at	8.23891	8.18751	8.20319	8.132	8.01336	8.08348	7.99464	7.87814	7.74756	7.78188	7.70049	7.43131	7.5626	7.13427	7.34897	7.35186	7.57851	7.53854
201016_at	6.65387	7.00361	6.75961	6.92986	6.56896	6.66992	6.75295	6.39394	6.28993	6.13617	6.25497	6.3344	5.89574	5.62334	6.00629	6.01523	5.83695	5.68892
201019_s_at	9.46229	9.52616	9.41887	9.24015	9.05695	9.08299	9.40605	9.12258	8.9627	8.99641	9.04502	9.19624	9.02654	8.6627	9.05601	8.54528	8.85317	8.61099
201022_s_at	10.6326	10.7914	10.6281	10.736	10.5017	10.6294	10.5269	10.417	10.2846	10.138	10.0893	10.2473	9.98895	9.70992	9.85387	9.82921	9.7978	9.89941
201028_s_at	8.81673	8.75877	8.8115	8.47769	8.71936	8.85422	8.50153	8.4386	8.38137	8.20057	8.08059	8.19188	8.13934	7.90794	7.96123	8.28323	8.31463	8.30473
201058_s_at	6.84992	6.97077	6.83288	7.49445	7.7444	7.84773	7.62924	7.68651	7.3549	7.28305	7.58228	7.34307	7.38925	7.00288	7.03093	7.17107	7.20785	6.90019
201117_s_at	7.40115	7.43005	7.42621	7.61089	7.70872	7.88413	7.91801	7.67112	7.66692	7.53227	7.4166	7.47436	7.25479	6.68488	7.4036	7.21658	7.14125	7.09121
201125_s_at	8.82136	8.76988	8.85209	8.95175	8.83694	8.69222	8.61028	8.48343	8.43236	8.14221	8.28842	8.12052	8.20632	8.14921	7.94421	7.9114	8.03366	8.00471
201157_s_at	7.65878	7.46079	7.56957	7.44664	7.50479	7.55497	7.34506	7.27208	7.05493	7.14886	7.03333	7.31046	7.11822	6.88275	6.78743	6.92154	7.13614	6.73394
201160_s_at	9.45192	9.36402	9.29498	9.24205	9.04103	9.37849	9.18047	9.00769	9.09395	9.05991	8.59969	8.77616	8.40449	8.46515	8.46759	8.41274	8.4525	8.02832
201161_s_at	8.01303	8.44412	8.23276	8.56978	8.5238	8.57197	8.50459	8.3892	8.40607	8.24657	8.33342	8.17694	7.71529	7.76716	7.75844	7.97044	7.82957	7.4692
201169_s_at	5.64603	5.68779	5.9203	6.05323	6.10277	6.35258	6.10328	5.58747	5.98268	5.88962	5.42494	5.64819	5.30399	5.37443	5.00342	4.91093	4.82229	5.01246
201196_s_at	8.12663	8.20539	8.12563	7.95232	7.75751	7.74649	7.82353	7.73771	7.41126	7.54169	7.42924	7.67433	7.66035	7.19419	7.33442	7.20101	7.30672	7.22581
201197_at	8.53367	8.73556	8.56259	8.52219	8.30815	8.31399	8.44947	8.48032	8.00089	8.1515	8.11761	8.45133	8.23194	7.71455	8.07133	8.08297	7.91272	7.79639
201209_at	9.23416	9.20208	9.15305	8.98477	9.03562	9.07469	8.86983	8.742	8.7258	8.47008	8.70781	8.5791	8.65315	8.38741	8.47497	8.70089	8.60135	8.60355
201219_at	6.55005	6.43035	6.19131	6.33449	6.1203	6.25033	5.97905	5.87877	5.79152	5.89231	5.54228	5.79388	5.90827	5.53618	5.59439	6.15124	5.86888	5.70337
201231_s_at	12.0596	12.1259	12.0985	12.2382	12.1413	12.1143	12.0329	11.9585	12.2501	12.1489	12.0265	11.7038	11.5599	11.661	11.3239	11.3489	11.2442	11.1437
201243_s_at	8.30161	8.17782	8.19923	8.04279	7.97834	8.037	8.11083	7.75534	7.69781	7.66747	7.42437	7.64865	7.53879	7.25263	7.32813	7.37675	7.30749	7.31103
201251_at	10.7731	10.7607	10.7177	11.2737	11.1584	11.1667	10.9849	10.9595	10.9541	10.6616	10.7979	10.5659	10.3995	10.3491	10.3655	10.3274	10.281	10.2533
201260_s_at	7.28623	7.74303	7.5068	7.31105	7.062	7.14259	7.26998	7.20406	7.1716	6.87759	6.91572	6.97866	6.88344	6.77569	6.93262	6.73317	6.74072	6.58123
201300_s_at	5.4394	5.91063	5.74108	5.42424	5.12359	5.38963	5.42223	5.00446	5.56154	5.01021	5.06055	5.04065	4.93521	4.90033	4.99007	4.86986	5.3087	4.95203
201368_at	9.56332	9.57247	9.59327	9.61087	9.30489	9.50087	9.37599	9.252	9.18299	9.1387	9.0323	9.13025	9.18513	8.76719	8.93385	8.85965	9.07258	8.88662
201369_s_at	6.90134	7.09651	6.88725	7.28413	6.83731	7.18727	7.02913	6.93456	6.64602	6.33938	6.52778	6.64231	6.60731	6.16544	6.1366	6.65112	6.56107	6.36492
201410_at	7.63591	7.95884	7.97676	7.72391	7.57552	7.79986	7.53008	7.30076	7.42361	7.09173	7.40611	7.34786	7.55253	7.13473	7.27393	7.22419	7.58362	7.20747
201424_s_at	6.78401	7.23157	7.11782	6.95764	6.45146	6.70178	6.72038	6.78121	6.64164	6.34165	6.19476	6.48272	6.35772	5.93214	6.53972	6.49719	6.3494	6.38849
201428_at	5.5898	5.84598	5.6912	5.67097	5.83542	5.98722	5.5561	5.1669	5.1821	5.29893	5.04451	5.22193	4.90988	5.06604	4.8732	5.27548	5.01676	5.00685
201435_s_at	8.63012	8.76373	8.85022	8.72597	8.46992	8.65122	8.50831	8.46406	8.32898	8.20182	8.40212	8.51926	8.09727	8.02866	8.14159	7.78396	8.14529	8.01555
201436_at	6.09883	6.0616	5.90194	5.87405	5.20844	5.73112	5.6675	5.34922	5.23069	5.32571	5.42093	5.59203	5.43614	4.95962	5.12786	5.27166	5.31516	5.1109
201443_s_at	8.86371	9.05455	8.87835	8.71208	8.30736	8.65818	8.55522	8.12587	8.07267	7.91838	7.84693	8.37055	8.32829	7.81089	8.03853	8.25538	8.26494	8.29411
201444_s_at	8.6786	8.50752	8.70955	8.52158	8.47227	8.34553	8.31074	8.0434	8.12377	7.91364	7.89951	8.08526	7.66182	7.95533	7.91652	8.20394	8.13567	7.93116
201454_s_at	8.81087	9.01376	8.94344	8.50322	8.592	8.46264	8.64119	8.32364	8.43792	8.27436	7.79159	8.32193	8.05987	7.97666	8.1067	8.08731	8.12032	7.93498
201482_at	7.29795	7.36712	7.37798	7.36509	7.34814	7.50949	7.22905	7.24498	7.28583	7.1465	6.90473	7.0943	7.00391	6.86684	7.05349	6.55041	6.77756	6.92928
201501_s_at	7.18536	7.2389	7.08993	7.01315	6.6796	7.06781	6.71124	6.68378	6.75013	6.53366	6.64803	6.58821	6.53102	6.00207	6.19599	6.47611	6.60832	6.53136
201505_at	8.30221	8.47189	8.30825	8.32736	8.12317	7.93047	8.20754	8.0032	8.26535	7.69088	7.71012	7.5851	7.41365	7.33034	7.34168	7.48659	7.39256	7.02584
201506_at	9.65842	9.61297	9.53299	9.77477	9.56167	9.70495	9.55937	9.39493	9.43826	9.39301	8.79168	8.8676	8.86837	8.70721	8.81179	9.41053	9.43708	9.32351
201520_s_at	8.71755	8.63362	8.58318	8.53667	8.44123	8.5204	8.35981	8.35602	8.36051	8.30681	8.0409	8.21003	7.98895	7.81478	7.89317	7.65812	8.0079	7.98111
201548_s_at	8.9067	8.90411	8.8667	8.7649	8.51081	8.89743	8.65913	8.53068	8.58063	8.3249	8.29379	8.28792	8.40839	8.1729	8.26185	8.10359	8.24522	8.26071
201549_x_at	8.72708	8.90159	8.83939	9.06111	8.69935	8.95139	8.67419	8.39115	8.75856	8.22589	7.93473	8.36489	8.31467	8.01559	7.9652	8.18884	8.19895	8.09932
201559_s_at	8.66755	8.73376	8.67326	8.52224	8.50388	8.41796	8.27054	8.06046	8.23089	7.92737	8.18809	8.18833	7.44643	7.93978	7.89229	7.94193	8.21617	7.80494
201601_x_at	7.49765	7.61157	7.67845	7.06159	7.28212	7.55415	7.15815	7.06863	7.0696	7.08123	7.06027	6.85579	6.70754	6.81821	6.51444	6.70885	6.69264	6.75249
201617_x_at	7.2551	7.42715	7.29235	7.15221	7.08547	6.6843	7.07639	6.84704	6.47897	6.62189	6.66617	6.69183	6.74589	6.37498	6.82155	6.57702	6.473	6.77234
201623_s_at	10.0332	10.1266	10.1527	10.2913	10.085	10.1857	9.95618	9.76238	10.0337	9.73202	9.64841	9.5066	9.36396	9.42012	9.23487	9.33195	9.31437	9.25148
201624_at	6.32611	7.0047	6.79103	7.25309	6.89346	7.07346	6.94019	6.60138	6.78742	6.43471	6.35366	6.20711	6.05158	5.77864	5.81284	5.54762	5.68838	5.8353
201635_s_at	9.51909	9.5387	9.48082	9.52353	9.2468	9.20415	9.28821	9.32348	9.4285	9.23735	8.88672	9.2131	8.92518	8.98369	9.11622	8.74937	8.90398	8.8063
201645_at	7.20355	7.03431	7.21724	7.85153	7.28382	7.61345	6.99895	6.93464	6.82813	6.35393	6.44477	6.17918	6.18793	6.23791	6.32512	6.86608	7.05744	6.78633
201659_s_at	7.39505	7.58768	7.74208	7.26186	7.10349	7.43273	7.17855	6.96202	6.9962	7.20139	7.08534	6.95437	6.94028	6.7678	6.96973	6.73281	7.15325	6.84216
201701_s_at	6.49448	6.65853	6.91429	6.57395	6.39002	6.47577	6.26421	6.04586	6.32969	5.92474	6.23938	5.92604	6.0137	5.87924	5.74508	5.97579	6.17605	5.93234
201801_s_at	7.38695	7.22944	7.283	7.27806	7.37824	7.33745	7.14413	6.92901	6.9927	7.07057	6.75677	7.12608	6.93323	6.98751	6.56357	6.54608	6.6687	6.64265
201811_x_at	7.42101	7.81055	7.88167	7.70826	7.38133	7.62485	7.38202	6.98678	7.29044	6.72694	7.04787	6.85981	6.81793	6.37511	7.03175	7.33538	7.08586	7.25118
201818_at	8.57349	8.45044	8.48199	8.46547	8.43565	8.3394	8.34134	8.19427	8.07811	7.86186	8.03819	8.00087	8.03333	7.87055	7.90991	7.8998	7.97095	7.80171
201845_s_at	7.84951	7.98332	8.0645	7.8995	7.63697	7.51303	7.75288	7.29865	7.58377	6.92176	7.14379	7.22455	7.17517	7.0846	7.2285	7.52038	7.7024	7.39554
201867_s_at	5.93068	5.93017	5.89687	5.86236	5.4503	5.76929	5.75457	5.64853	5.86134	5.41062	5.16966	5.65077	5.02971	5.34839	5.31411	5.09507	5.30492	5.19934
201874_at	8.63454	8.72307	8.54912	8.61699	8.48919	8.48997	8.27337	8.28371	8.23819	7.94483	7.9132	7.90902	7.91014	7.60836	7.86677	7.83734	7.87301	7.92932
201875_s_at	8.3864	8.41279	8.3714	8.12288	8.21744	8.22776	8.02751	8.09368	7.93238	7.81528	7.98449	7.70251	7.67179	7.61011	7.71341	7.66064	7.94047	7.755
201899_s_at	6.96457	7.09636	6.82323	6.98199	6.72792	6.72711	6.62516	6.5146	6.38116	6.27639	6.25168	6.45585	6.17535	6.18753	6.54113	6.54163	6.70027	6.67011
201912_s_at	7.69057	7.79085	7.94471	7.64475	7.56791	7.65414	7.60793	7.40768	7.13937	7.31449	7.11496	7.38764	7.25673	6.84993	7.13127	7.10307	7.09904	7.10391
201921_at	8.96817	8.76629	9.01414	8.65046	8.3451	8.62253	8.40407	8.27704	8.17944	8.41104	8.24562	8.3001	8.2233	8.00144	8.14166	8.03437	8.10997	8.07948
201924_at	7.85354	8.10901	8.15971	8.14696	7.95595	7.76614	7.68555	7.37704	7.58501	7.52625	7.42366	7.38035	7.57199	7.35409	7.0769	7.47364	7.66716	7.40192
201927_s_at	6.08189	6.18681	6.19331	6.41171	6.37989	6.53307	6.33504	6.41233	6.49982	6.01706	6.03486	6.03115	5.72251	5.87078	5.88271	5.74879	5.82787	5.46347
201942_s_at	6.08643	6.30284	6.1589	6.57814	6.37502	6.28387	6.44892	6.58284	6.22154	5.90475	6.02064	5.83973	5.76203	5.89374	5.73872	6.01229	5.83859	5.55148
201943_s_at	6.34224	6.38221	6.58457	6.38223	6.23102	6.09274	6.31504	6.4605	6.1326	5.96281	5.82806	6.13236	5.94877	5.83328	5.97274	5.54653	5.57739	5.83598
201955_at	8.91437	9.06477	8.92402	8.80278	8.54563	8.51677	8.5667	8.4777	8.42868	8.2408	8.24474	8.28697	8.36678	8.00789	8.26891	8.29101	8.34906	8.17233
201976_s_at	8.47637	8.48804	8.50546	8.38369	8.28159	8.4965	8.20414	8.18091	8.24607	7.88034	8.11022	8.09946	7.78408	7.69057	7.71996	7.81395	7.9461	7.74897
201998_at	8.3895	8.31494	8.3238	8.38466	8.27427	8.3573	8.3167	8.18166	8.14753	8.00293	7.98138	8.06528	7.80624	7.88645	7.69223	7.7828	7.90988	7.90044
202022_at	8.17905	8.23847	8.10392	8.0296	7.98123	8.0981	7.82529	7.6379	7.98639	8.03038	7.72748	7.63944	7.45646	7.67935	7.46694	7.09524	7.24563	7.12945
202043_s_at	8.31257	8.63629	8.52488	8.41623	8.1847	8.45079	8.27098	8.05257	8.05051	8.03862	8.03315	7.89746	7.79872	7.64848	7.59907	7.69022	7.68881	7.67627
202075_s_at	8.0014	7.6893	7.90468	7.67886	7.6187	7.81403	7.49991	7.42968	7.42413	7.11123	7.19243	7.08149	6.96357	6.76195	6.99249	7.02118	7.15248	6.96241
202113_s_at	7.67817	8.12442	7.98701	7.96627	7.68394	7.83254	7.86345	7.54473	7.70741	7.44631	7.22128	7.56634	7.35128	7.22505	7.22063	7.3655	7.41754	7.20519
202121_s_at	8.1072	7.93184	7.83764	7.97538	7.72753	7.87728	7.55843	7.35226	7.43999	7.54315	7.27067	7.43432	7.09196	7.2404	7.15417	7.55607	7.57341	7.50139
202168_at	8.64746	8.87502	8.81682	8.76738	8.67649	8.74123	8.61273	8.37254	8.39964	8.26376	8.16327	8.4102	8.20181	8.1139	8.08332	8.10559	8.2258	8.12931
202206_at	8.25931	8.32943	8.3299	8.73474	8.82936	8.62949	8.78855	8.82561	8.64457	8.44282	8.19753	8.16111	7.73347	7.41264	7.44021	7.39896	7.41504	6.93256
202208_s_at	8.28432	8.42839	8.38265	8.74521	8.7335	8.63392	8.50045	8.35667	8.19922	8.14899	8.03258	7.98548	7.66015	7.53117	7.25809	7.5289	7.34736	7.14126
202228_s_at	9.26291	9.18512	9.31272	9.05746	8.95675	8.98124	8.95425	8.78447	8.66727	8.75398	8.46536	8.56586	8.79077	8.30926	8.53908	8.67178	8.47747	8.44127
202266_at	8.44385	8.61443	8.37329	8.41292	8.27216	8.2166	8.12096	8.06551	8.00982	7.72892	7.92023	7.80232	7.9622	7.67984	7.83825	8.10234	8.05883	7.7886
202277_at	8.97951	9.14185	9.26443	9.01257	8.90272	9.09876	8.91076	8.54992	8.67994	8.40485	8.33692	8.68507	8.50434	8.24008	8.24178	7.96676	8.36509	8.1851
202315_s_at	7.18022	7.29877	7.35201	7.2667	7.00245	7.17118	6.94682	6.65046	6.75647	6.46244	6.51003	6.6808	6.60382	6.89161	6.5779	6.88296	6.74546	6.73735
202352_s_at	7.78245	7.97584	7.80776	7.83841	7.47616	7.74514	7.59577	7.61709	7.57597	7.20821	7.28612	7.35623	7.17097	7.12705	7.28289	6.92327	7.35994	7.09884
202364_at	8.7308	8.91709	9.01065	8.88124	8.86745	9.00438	8.8286	8.50056	9.06378	8.58693	8.31762	8.62709	8.05798	8.37072	7.98709	8.13682	8.20147	8.00231
202388_at	8.66596	8.45732	8.45457	8.15383	8.13745	8.72058	8.38368	7.8067	7.89234	7.90329	7.75171	7.8646	7.9335	7.66754	7.63592	7.97926	8.22511	7.78432
202393_s_at	6.21787	6.04338	6.22163	6.15303	6.19104	6.44774	6.35779	5.71014	5.9046	5.89926	5.61512	5.76317	5.7207	5.54535	5.53281	5.78938	5.8789	5.74026
202429_s_at	7.5997	7.4759	7.62056	7.5956	7.37089	7.30446	7.42063	7.05301	7.08062	6.8194	6.92203	6.84932	6.97738	6.67374	6.61833	7.26875	7.18025	6.95685
202431_s_at	6.81015	6.98368	6.81264	7.59227	7.14689	7.73282	7.5598	7.56781	7.77875	7.7383	7.63478	7.66118	7.18128	7.19252	7.12675	7.06599	6.90954	6.88299
202457_s_at	7.91563	7.85544	7.99812	7.80137	7.71076	7.48315	7.84044	7.54468	7.40368	7.20504	7.27819	7.26519	7.36956	7.005	7.20896	7.46495	7.55084	7.37645
202511_s_at	6.92767	7.23261	7.00435	7.06917	6.96571	6.89461	6.65641	6.51102	6.47033	6.59589	6.3705	6.50371	6.55438	6.29754	6.09104	6.31882	6.54307	6.29779
202533_s_at	7.59005	7.61486	7.58895	7.36776	7.17113	7.48708	7.40136	7.24923	7.15688	7.07032	7.09313	7.3853	7.00927	6.85301	7.30392	6.76661	6.81657	6.84949
202536_at	6.66916	6.71668	6.69229	6.59793	6.097	6.23726	6.29212	5.96493	5.89527	5.82433	5.79453	5.9799	6.21788	5.24151	5.71022	5.946	6.16776	5.81178
202537_s_at	5.49916	6.19102	5.8946	5.86487	5.65504	5.70847	5.51956	5.34191	5.5794	5.14217	5.31241	5.314	5.47827	4.95726	5.36228	5.40839	5.2717	5.19436
202595_s_at	7.93218	8.16865	8.02267	7.84365	7.79942	7.94206	7.71248	7.56701	7.63292	7.50742	7.29496	7.39746	6.96511	7.04134	6.91869	7.21585	7.12831	7.40051
202619_s_at	7.31158	7.32413	7.30467	7.77374	7.41722	7.35167	7.66156	7.17908	7.97834	7.51202	7.26706	7.1267	6.73201	6.98688	6.56076	6.66849	6.76614	6.4532
202620_s_at	7.64458	7.75248	7.61225	8.014	7.71628	7.41058	7.87605	7.39851	8.44544	7.71123	7.14681	7.26644	6.81713	7.1009	6.73876	6.4411	6.31326	6.48287
202623_at	8.00465	7.95421	7.90563	7.90934	7.94602	8.12146	7.75996	7.54351	7.6321	7.49947	7.61583	7.5862	7.24066	7.24538	7.26097	7.27985	7.56121	7.32444
202670_at	8.28943	8.37118	8.32096	8.39247	7.84488	8.25957	8.03993	7.78004	8.13246	7.71028	7.73691	7.73258	7.79878	7.3353	7.59523	7.86759	7.80556	7.7746
202673_at	8.36148	8.64636	8.47143	8.40929	8.09726	8.4196	8.41763	8.22328	8.18539	8.16836	8.10109	8.23526	7.9529	7.65464	8.03325	7.95084	7.88491	7.866
202697_at	8.65492	8.69594	8.65511	8.29408	8.18726	8.29019	8.04478	7.98347	7.9501	7.92281	7.78025	8.11702	7.90599	7.64798	7.69286	7.65873	7.8255	7.82773
202709_at	6.77687	6.55433	6.70549	7.09046	7.01876	7.07087	7.44813	7.48667	7.60777	7.6465	7.25295	7.25033	6.72694	6.96883	6.77923	6.99019	6.67962	6.98251
202718_at	9.561	9.38311	9.39929	10.291	10.1916	10.2131	10.2277	10.0801	10.338	10.1809	10.1066	9.85279	9.59273	9.57249	9.40352	9.71562	9.67678	9.74332
202734_at	6.77833	7.06377	6.6654	6.65081	6.82082	6.70516	6.52107	6.51917	6.36094	6.01017	6.19262	6.11869	6.07272	6.23285	5.9123	5.88327	6.00878	5.85011
202770_s_at	8.13969	8.47994	8.35165	8.41047	8.16961	8.37092	8.56253	8.35423	8.54537	8.00551	8.11307	7.9239	7.92396	7.58737	7.88455	8.09647	7.7915	7.68865
202771_at	6.28939	6.2508	6.22537	6.45136	6.50622	6.50576	6.35612	6.27068	6.44632	6.12163	6.0481	6.15113	5.80377	6.07806	5.87478	5.97828	5.59814	5.86314
202824_s_at	8.58689	8.47991	8.41521	8.33658	8.26897	8.35426	8.11564	7.92733	7.90409	8.04499	7.91014	8.16776	7.9376	7.60443	7.88806	8.087	7.96004	8.00334
202842_s_at	7.68817	7.86892	7.89754	7.78153	7.58392	7.67946	7.69061	7.20429	7.17337	7.38622	7.1146	7.26824	7.46035	7.0835	7.21282	7.41523	7.26616	7.20847
202854_at	8.02151	8.14957	8.11464	7.91386	7.7816	8.09318	7.85972	7.5798	7.70685	7.47144	7.55597	7.52813	7.39971	7.09018	7.16693	7.22948	7.24374	7.02815
202857_at	9.67922	9.58536	9.57004	9.24939	9.34581	9.41937	9.09815	9.06825	9.03325	9.017	9.05723	8.82663	8.87758	8.84024	8.86122	9.13121	9.16308	9.11301
202887_s_at	10.8172	10.7416	10.8435	10.9294	10.9017	11.0508	11.006	10.7291	10.6873	10.537	10.687	10.2731	10.1823	9.84218	9.61952	9.47442	9.38069	9.32712
202892_at	7.69987	7.86109	7.71865	7.88059	7.49641	7.85581	7.71224	7.28224	7.48089	7.26895	6.96726	7.47192	7.10089	7.24153	7.24733	7.28334	7.08887	7.2357
202900_s_at	7.28977	7.60121	7.45655	7.45187	7.07744	7.43423	7.10757	6.99436	6.86176	6.7748	6.78633	7.142	6.83537	6.71962	6.75402	7.06856	6.87233	6.98011
202918_s_at	8.68898	8.95574	8.86503	8.61292	8.3875	8.66589	8.34791	8.16635	8.35887	8.10036	8.48825	8.30267	8.29839	8.15892	8.18531	8.05503	8.29032	7.94958
202950_at	8.43228	8.4892	8.47534	8.46418	8.30607	8.26138	8.1535	7.9899	7.77529	7.76137	7.51767	7.79919	7.86615	7.47445	7.44291	7.79186	7.69078	7.68313
202956_at	7.67858	7.79278	7.87206	7.87537	7.65817	7.28144	7.57372	7.49125	7.46859	7.18327	7.24537	7.3199	7.42457	7.28795	7.14278	7.23676	7.30081	7.37283
202973_x_at	7.86861	7.96735	7.93198	8.03553	7.8061	7.91945	7.94783	7.57999	8.16565	7.51777	7.20656	7.59672	7.35464	7.12083	7.26756	7.37634	7.29602	7.34413
203002_at	8.09048	7.90406	8.11951	8.01223	7.98375	8.1868	8.33918	8.15483	8.03425	7.85058	7.8212	7.85111	7.55431	7.51786	7.58869	7.32297	7.60896	7.59213
203028_s_at	8.58434	8.6725	8.47264	8.64183	8.49348	8.47987	8.16991	8.11389	8.17373	8.10497	8.02644	7.83705	8.05377	7.94801	7.68789	7.8653	7.92538	7.69757
203085_s_at	6.67048	6.87638	6.5589	6.90873	6.73841	7.12832	6.9147	6.66665	6.96051	6.65605	6.69676	6.59413	6.41807	6.36906	6.36491	6.11032	6.37911	5.94722
203099_s_at	6.83036	7.18141	6.96251	6.7539	6.5965	6.68033	6.47721	6.38767	6.43408	6.53405	6.40264	6.37147	5.93122	6.07238	6.32802	6.39073	6.13205	6.3803
203102_s_at	6.67835	6.72615	6.56117	6.59893	6.12288	6.66776	6.34586	6.18869	6.07552	6.04237	5.99525	6.28286	5.98765	5.8747	6.17776	6.10364	6.30748	6.14758
203124_s_at	6.62402	7.10712	7.01145	6.78592	6.55863	6.7005	6.54307	6.4605	6.30555	6.13695	6.27579	6.19922	6.073	5.67933	6.02652	5.99306	6.24793	6.03965
203176_s_at	5.80914	6.10423	6.01849	5.99066	5.7322	5.62605	6.06062	5.63618	5.90709	5.79719	5.32174	5.88039	5.20571	5.10195	5.36895	5.06267	5.46757	5.27975
203177_x_at	7.40226	7.65994	7.42992	7.30394	7.22763	7.12623	7.14086	7.07723	6.97995	6.84622	6.84098	7.0337	6.81201	6.68714	6.36744	6.34597	6.53957	6.3103
203211_s_at	6.81462	6.96785	6.90415	6.9959	6.47775	6.86553	6.85748	6.53561	6.44836	6.39815	6.19025	6.57613	6.01194	6.19473	6.30373	6.21628	6.25698	6.18247
203216_s_at	6.16898	6.26887	6.2297	6.29671	6.03914	5.80689	6.08675	5.83497	5.75172	5.34214	5.52832	5.69547	5.83099	5.41299	5.33644	5.4974	5.37386	5.10603
203219_s_at	7.67527	7.57863	7.56262	7.75749	7.78885	7.65229	7.4668	7.40458	7.32966	7.3901	7.21069	7.30398	6.93645	6.92765	7.05078	7.16621	6.86252	7.09961
203234_at	5.84117	5.75699	5.65653	5.74487	5.68913	5.62849	5.5068	5.26496	5.19333	5.38264	4.87039	5.25849	5.01366	5.22757	5.25936	4.84747	4.85679	5.04489
203263_s_at	6.12711	6.4592	6.0498	6.22027	5.98196	5.88206	5.90285	5.50574	5.75064	5.67017	5.46463	5.60311	5.65647	5.43689	5.62154	5.6675	5.4432	5.6177
203282_at	6.82577	6.78088	6.87133	7.26376	6.80774	7.08438	7.00063	6.61048	7.11753	7.0038	6.83531	6.68409	6.52249	6.35776	6.36779	6.36882	6.44871	6.45497
203296_s_at	6.18878	6.3518	6.26966	6.28229	5.92057	6.16583	6.02367	5.92749	6.19623	5.67423	5.74419	5.55741	5.63788	5.19771	5.2872	5.23668	5.50379	5.28781
203404_at	8.87025	8.94476	8.95374	8.72427	8.58882	8.93931	8.54256	8.56311	8.2955	8.29747	8.35159	8.36628	8.23313	7.92727	8.26951	8.40779	8.50378	8.26931
203438_at	7.33555	7.35022	7.42708	8.0534	7.88712	8.05947	7.9139	7.49079	8.18317	7.70811	7.66148	7.01646	6.45136	6.66188	6.66505	6.11926	6.44357	6.47321
203439_s_at	6.27813	6.48883	6.2367	6.73926	6.63833	6.62756	6.92387	6.13588	6.97292	6.57047	6.28446	6.18254	5.4056	5.84625	5.58042	5.31784	5.58125	5.55236
203504_s_at	6.96069	7.15658	6.88296	7.01371	6.69324	6.74446	6.60008	6.61099	6.64415	6.37023	6.06736	6.11277	6.03987	6.4322	5.97705	6.47564	6.23409	6.40374
203509_at	8.6733	8.78124	8.7297	8.49905	8.62911	8.55198	8.43423	8.41099	8.41674	8.14627	7.94171	7.82628	7.85184	7.89718	7.64114	7.61113	7.75709	7.79857
203528_at	6.53388	6.72427	6.75161	6.91356	6.62785	7.16172	6.35681	6.4733	6.0967	6.22906	6.12648	6.10289	6.15742	5.96698	6.12004	6.10598	5.99913	6.0993
203545_at	8.36781	8.38947	8.3493	8.25468	8.03742	8.2336	8.01294	7.91856	7.97782	7.83155	7.83393	7.88551	7.8146	7.47038	7.81727	7.26169	7.60774	7.75289
203574_at	7.12182	7.43603	7.30994	7.65148	7.35367	7.74049	7.67467	7.20721	7.13331	7.10906	6.92026	7.03823	6.83231	6.71526	6.5554	6.65594	6.85618	6.5129
203704_s_at	6.97452	7.39054	7.27738	7.36911	7.0305	7.12568	6.97427	6.96448	6.85832	6.3825	6.7167	6.64034	6.62431	6.43436	6.29408	6.49446	6.57553	6.46468
203706_s_at	9.39498	9.48846	9.40864	9.53895	9.16237	9.34398	9.16409	9.22102	9.13503	8.65767	8.84051	8.89963	8.69712	8.15999	8.61403	8.36843	8.39552	8.2377
203710_at	4.41487	4.71527	4.65479	5.2221	4.44375	4.57745	4.63827	4.23931	4.31407	4.10033	4.34326	4.30887	4.17342	3.72881	4.07944	3.994	4.06737	3.99768
203713_s_at	5.09692	5.14116	5.20018	4.96831	5.05555	4.8869	5.04969	4.99193	4.92489	4.52822	4.81988	4.74038	4.65384	4.61321	4.65361	4.42008	4.57576	4.5473
203721_s_at	8.99572	8.82929	8.82357	8.79528	8.47491	8.65599	8.30926	8.21534	8.25164	8.27805	8.05727	8.2562	8.08793	7.73384	7.93384	8.0331	8.04172	8.08985
203735_x_at	6.1238	6.57699	6.67279	6.2284	5.85409	6.23134	5.85652	5.92524	6.10183	5.72483	5.89747	5.76558	6.00356	5.69189	5.93117	5.72971	5.55857	5.69682
203765_at	5.61063	5.58908	5.53881	5.50934	5.32988	5.44993	5.46932	5.08059	5.29189	5.29971	5.28022	5.00119	5.05416	4.7574	4.79461	4.777	4.85461	4.68928
203775_at	7.56481	7.92913	7.79911	7.5996	7.3215	7.47018	7.43873	7.20913	7.1772	6.99035	7.08059	7.25019	6.95276	6.81445	6.82423	6.73179	6.93956	6.56784
203778_at	6.69077	7.05077	6.72141	6.70003	6.38926	6.50716	6.42019	6.39141	6.64763	6.40177	6.13423	6.13935	5.9404	5.95626	6.07394	6.29231	5.95642	6.007
203819_s_at	8.68165	8.88318	8.71853	8.79643	8.61527	8.58243	8.77557	8.60814	8.4726	8.40049	8.40759	8.56497	8.49337	8.19286	8.27154	8.02405	8.18303	8.08996
203820_s_at	9.18803	9.27415	9.16322	9.29139	9.03615	8.95829	9.23704	8.99695	8.92527	8.76967	8.87172	9.03025	8.81645	8.47861	8.62768	8.33745	8.45335	8.24761
203881_s_at	5.31545	5.40291	5.37608	5.61876	5.43309	5.42117	5.60627	5.58872	5.33441	5.30163	5.63866	5.47583	5.0771	4.78387	4.81614	4.86802	5.04835	4.70065
203892_at	6.92279	6.98874	6.99228	7.13237	7.00981	7.0456	6.9351	6.81126	7.20886	7.01824	6.6663	6.62952	6.16342	6.72371	6.4966	6.31869	6.3947	6.59767
203910_at	8.23195	8.40041	8.468	8.45068	7.99222	7.99689	8.39826	8.08553	8.1307	7.98873	7.60571	7.83833	7.88445	7.34405	7.39497	7.46223	7.65658	7.61002
203951_at	6.00769	5.78331	5.88706	6.22711	6.25685	6.40064	6.59307	6.53176	6.43823	6.46554	6.57613	6.35286	6.32373	5.90684	5.9108	6.12851	6.02199	6.02751
203953_s_at	4.98885	5.18554	5.10474	5.05263	5.00134	5.01425	4.78335	4.67315	4.58334	4.78599	4.58537	4.39885	4.28943	4.49647	4.23012	4.29802	4.24022	3.97564
203967_at	6.61375	6.48822	6.6271	6.57774	6.27579	6.53792	6.181	6.22787	5.90573	5.92573	5.98002	6.12672	5.7874	5.64329	5.86908	5.79962	6.13853	5.7738
203968_s_at	7.40294	7.51763	7.40502	7.34965	7.21857	7.11483	7.1596	7.17922	6.84672	6.94072	6.79325	7.04121	6.9136	6.84476	6.70675	6.69847	6.82322	6.57211
203971_at	6.16569	6.13926	6.33658	5.91912	5.72785	5.80607	5.71979	5.5302	5.44771	5.52019	5.47396	5.51498	5.59074	5.21422	5.36146	5.16123	5.35495	5.54987
203987_at	6.38875	6.81244	6.65051	7.1192	6.54577	6.83681	7.02067	6.59893	6.63285	6.31639	6.05772	6.31239	6.15879	5.4276	5.93906	5.63226	5.6879	5.66194
203990_s_at	6.55694	6.73148	6.70219	6.85148	6.4861	6.04992	6.30838	6.19184	6.14247	5.96348	6.12786	5.93578	5.79422	5.63727	5.68675	5.19719	5.49319	5.28305
203991_s_at	4.14563	4.8737	5.02486	4.87186	4.39385	4.36354	4.80608	4.19811	4.38804	3.91606	4.06858	4.05327	3.84465	3.76289	3.78997	3.66701	3.52818	3.47122
204004_at	7.96162	8.14957	7.85291	8.30019	8.16338	7.84863	8.19348	8.12725	8.05975	7.58022	7.73161	7.60428	7.44609	7.08033	7.08175	6.78877	7.01789	6.89147
204049_s_at	7.57451	7.6834	7.56702	7.17182	7.10347	7.04712	7.17283	7.04928	7.00834	6.81653	6.91678	6.93154	6.99109	6.72746	6.51818	6.73788	6.739	6.65804
204146_at	7.91759	7.94815	7.79382	7.9335	7.71415	7.55841	7.74653	7.55252	7.48331	7.20641	7.32109	7.49699	7.20688	7.27007	7.3344	7.04665	7.27785	7.04807
204185_x_at	8.27964	8.41147	8.64179	8.36011	8.06955	8.24889	8.14371	8.02605	7.94013	7.79072	7.45828	7.9363	7.72104	7.53466	7.83414	7.74739	7.61964	7.57617
204186_s_at	8.17698	8.03287	7.99594	8.15914	8.01213	7.99541	7.82274	7.91689	7.66252	7.39094	7.75216	7.56089	7.4817	7.38727	7.24164	7.07312	7.396	7.29561
204201_s_at	7.39457	7.52066	7.50118	7.4172	7.27013	7.05855	7.27645	7.07936	6.85625	6.66204	6.83423	6.90662	6.74365	6.18555	6.56316	6.48412	6.50827	6.38556
204215_at	6.27425	6.35174	6.17986	6.42943	6.02056	6.45348	6.23663	6.19342	6.03581	6.0394	5.73328	5.86055	5.74667	5.48508	5.5126	5.71389	5.67102	5.43866
204256_at	7.9633	7.94376	7.93204	8.0415	7.59699	7.96427	7.83182	7.8072	7.58616	7.36546	7.08145	7.47166	7.37492	6.88	7.21605	6.67036	6.8712	6.71506
204274_at	7.20563	7.45034	7.52662	7.39086	7.1671	7.2234	7.21329	6.92195	7.08396	6.81665	6.68685	7.02513	6.99455	6.64124	6.85913	6.75344	6.98904	7.07256
204284_at	8.18438	8.18679	8.15204	8.65088	8.41361	8.6702	8.52409	8.11305	8.29742	7.84375	7.84339	7.73138	7.44255	7.41573	7.35312	7.24527	7.39834	6.9205
204407_at	5.44531	5.75972	5.46161	5.38816	5.0613	5.3415	5.31978	5.49514	5.08172	4.92365	5.13806	5.12087	5.16973	4.95171	5.00286	4.84345	4.86108	4.5028
204426_at	6.58652	7.02982	7.19699	6.59765	6.75804	7.1081	6.44007	6.31665	6.17004	6.44231	6.17728	6.40646	6.40987	6.0345	6.2146	6.44111	6.45358	6.45508
204427_s_at	8.89118	8.91882	8.85337	8.78589	8.68234	8.79294	8.49501	8.25825	8.26025	8.2499	7.97054	8.21854	8.10826	8.02402	8.27012	8.51568	8.49012	8.35795
204521_at	6.69687	6.88013	6.74981	7.37495	6.7477	7.13303	7.1	7.00708	7.35162	7.17623	6.70075	6.73147	6.54168	6.27396	6.12602	5.78546	6.06561	6.32331
204595_s_at	7.45794	7.44593	7.55784	7.63394	7.3337	7.62278	7.25406	7.03006	7.61286	7.0298	7.02416	6.6719	6.30679	6.78408	6.20116	6.13052	6.14934	6.16858
204596_s_at	6.45617	6.40326	6.29539	6.82528	6.21714	6.75297	6.2481	5.92486	6.4784	6.26065	5.86386	5.7403	5.23993	5.44596	5.40888	5.2174	5.44548	5.40682
204616_at	7.88445	7.7423	7.85351	7.81166	7.94399	7.77656	7.51715	7.4679	7.60019	7.19512	7.18715	7.43787	7.09871	7.25649	7.05043	7.21255	7.30142	6.96551
204653_at	7.51872	8.23246	7.80677	8.07771	7.59837	7.857	7.81407	7.66523	7.66892	7.61714	7.13792	7.51179	7.26048	7.27075	7.18736	7.31911	7.00012	7.19436
204675_at	6.17449	6.44138	6.25258	6.04605	5.6952	6.07083	5.77214	5.65452	5.63604	5.54374	5.90794	5.6386	5.39022	5.41626	5.44815	5.63057	5.80212	5.45942
204686_at	7.41178	7.65447	7.65526	7.55989	7.19727	7.46246	7.3585	7.1651	7.27228	6.98391	7.14134	6.94635	6.68204	6.3962	6.78668	6.75459	6.89697	6.56498
204724_s_at	6.61109	6.22001	6.32967	6.22342	6.41425	6.37	6.03485	5.84333	5.4585	5.44896	5.33892	5.24504	5.38868	5.23965	5.37558	6.1048	6.10152	5.96145
204750_s_at	5.58703	5.8038	5.67889	5.83539	5.48581	5.30811	5.65942	5.51082	5.34598	5.12737	4.95557	5.15054	4.97243	4.99102	4.81075	4.5935	4.39438	4.43269
204864_s_at	5.55666	5.91546	5.58231	5.68553	5.60923	5.13815	5.61041	5.79092	5.74038	5.54695	5.27667	5.39019	5.26015	5.30599	5.04202	5.15586	4.82743	5.01133
204865_at	4.19611	4.32756	4.29055	4.4198	4.32683	4.61835	4.54919	4.19172	4.20061	4.03574	3.70062	3.96568	3.68282	3.8815	3.80142	3.47671	3.72476	3.74859
204866_at	6.4589	6.37854	6.54478	6.1709	6.04568	6.12154	5.99576	5.93854	5.94691	5.74019	5.81233	5.7005	5.94534	5.42262	5.64327	5.41772	5.96469	5.68385
204905_s_at	8.01688	7.97213	7.96126	8.2591	8.16001	8.14944	8.05027	7.87199	7.84309	7.87094	7.86972	7.92034	7.58878	7.45026	7.5836	7.56559	7.4706	7.4988
204917_s_at	7.52911	7.41482	7.50943	8.43711	8.25841	7.8531	8.10831	8.02487	8.01723	7.67245	7.67391	7.59015	7.23973	7.4353	7.23077	7.24344	7.462	7.23825
204918_s_at	5.07134	4.96193	4.80243	5.91366	5.48596	5.18567	5.40072	5.08488	5.22185	5.20034	4.64655	4.92146	4.7246	4.44754	4.63744	4.61805	4.79351	4.70204
204975_at	7.59772	7.45887	7.55818	7.49579	7.45704	7.35811	7.18349	7.13214	7.13315	6.91571	6.99047	6.59695	6.8654	6.62159	6.64652	6.69319	6.88763	6.5643
204985_s_at	7.9053	7.71879	7.97214	7.78477	7.9852	7.86343	7.66493	7.5161	7.57818	7.63224	7.3981	7.57373	7.25469	7.26373	7.0799	7.22779	7.10629	7.18231
205053_at	8.25399	8.34816	8.23792	8.07183	7.91985	8.08183	7.85443	7.64224	7.74309	7.87145	7.51519	7.9133	7.61118	7.5881	7.66902	7.37815	7.39229	7.59152
205078_at	6.74022	7.0648	6.75672	6.87088	6.92335	7.00702	6.97953	6.59965	6.73327	6.35326	6.5672	6.51836	6.38931	6.43265	6.29986	6.27629	6.27268	6.13356
205105_at	7.7567	8.53019	8.27502	8.26757	8.02325	7.94215	8.00292	7.72571	7.72366	7.52314	7.62089	7.64538	7.74517	7.20831	7.39038	7.27423	7.59049	7.44056
205123_s_at	8.38376	8.63973	8.7712	8.621	8.34531	8.53062	8.33959	8.28472	8.31644	8.24528	8.18576	8.08092	8.0974	7.65846	8.07445	8.37373	8.34561	8.02087
205133_s_at	9.47467	9.54334	9.4569	9.49219	9.34057	9.59997	9.30753	9.19101	9.06241	9.06293	8.90743	9.22343	8.94672	8.6637	9.00072	8.76753	8.59806	8.70851
205139_s_at	6.02193	6.07554	6.18689	5.99322	5.82313	6.06191	5.89034	5.89591	5.803	5.57317	5.5023	5.34726	5.27298	5.28446	5.16143	5.19047	5.32169	5.06052
205309_at	4.77744	5.16751	4.80084	4.64734	4.73644	4.7479	4.43403	4.46952	4.49852	4.40159	4.20197	4.25681	4.3296	4.34689	4.32618	4.16146	4.12517	4.30915
205348_s_at	6.154	6.21655	6.26053	6.17294	6.13842	5.90843	5.91211	5.74492	5.75058	5.59191	5.58545	5.549	5.58704	5.37586	5.38327	5.47782	5.8002	5.50619
205361_s_at	8.48468	8.65362	8.54866	8.265	8.17422	8.20403	8.19444	7.61141	7.91561	7.9914	7.71114	8.05173	7.88817	7.40592	7.52466	7.61947	7.73063	7.34397
205393_s_at	7.22573	7.65115	7.58761	7.43916	7.3029	7.38324	7.43361	7.26664	7.16427	6.98321	7.30345	7.19593	6.89798	6.80094	6.86809	6.71347	6.73749	6.85383
205394_at	8.22633	8.38498	8.17525	8.21014	7.92519	8.16629	7.87893	7.77896	7.6403	7.61374	7.6928	7.81535	7.69025	7.40703	7.49697	7.04714	7.22734	7.09426
205417_s_at	8.79328	8.79453	8.87142	8.9029	8.68913	8.95289	8.69518	8.63033	8.47983	8.17896	8.19955	8.18455	7.95636	7.9139	8.0391	7.91375	7.95533	8.00114
205429_s_at	5.50874	5.81858	5.61425	5.70279	5.48417	5.35981	5.63869	5.33793	5.33587	5.09026	5.25982	5.08829	4.95174	5.02401	5.10857	4.77871	4.86012	4.87524
205443_at	5.27456	5.646	5.46541	5.93647	5.2008	5.39137	5.64305	5.06575	5.88347	5.06488	4.73361	5.18761	4.92224	4.69404	4.45522	4.51326	4.9366	4.6405
205463_s_at	5.35948	5.82345	5.61685	5.79119	5.77997	5.55975	5.93147	5.84341	5.72928	5.38956	5.34657	5.43463	5.06253	4.8755	5.05259	5.12417	5.03169	5.29025
205478_at	6.95132	6.53957	6.64766	6.75264	6.81886	6.83147	6.36294	6.16606	6.05648	6.00968	6.12853	6.06709	5.78134	6.09225	5.94971	6.36772	6.23404	6.31891
205619_s_at	6.12005	6.38903	6.39133	7.09182	6.77021	6.99703	7.29496	7.16231	7.15305	6.94866	6.92136	6.71304	6.66465	6.25157	6.44699	6.51328	6.41106	6.34585
205628_at	4.75212	4.8455	4.58023	4.47739	4.35037	4.61559	4.40807	4.13671	4.17933	4.09344	4.1602	4.37617	4.27032	3.94309	4.16068	3.95326	4.2827	4.04242
205687_at	7.3302	7.28079	7.21293	7.01552	6.93812	6.95284	6.90468	6.73465	6.67461	6.527	6.59956	6.83815	6.42639	6.45501	6.46797	6.53145	6.60237	6.4057
205691_at	6.38007	6.34847	6.244	6.00085	6.07551	6.38471	5.94962	5.97127	5.88439	5.94638	5.62547	5.66634	5.70369	5.39894	5.66821	5.63383	5.61207	5.45821
205710_at	5.25976	5.36174	5.54693	5.21679	4.80807	5.11052	5.02752	5.08475	4.92897	4.94546	4.78954	4.90546	4.91372	4.69537	4.76388	4.51804	4.71508	4.69602
205726_at	5.65196	5.99348	5.82381	5.88086	5.58561	5.2843	5.6073	5.46163	5.51946	5.33988	5.2422	5.31493	5.39404	5.23368	5.09882	5.19231	5.23784	5.29343
205807_s_at	6.73192	7.17687	7.07051	6.94824	6.64599	6.81408	6.86188	6.50312	6.49824	6.2135	6.14469	6.20529	6.16436	6.05659	6.153	6.08906	6.15425	6.10208
205865_at	6.90057	6.97408	7.06562	7.15895	6.97056	6.98211	6.90339	6.86988	6.82582	6.63379	6.56889	6.60147	6.67744	6.46458	6.42064	6.12889	5.8625	6.04012
205880_at	6.95757	7.00891	7.00194	7.09408	6.85166	6.99301	6.72152	6.63528	6.72583	6.37289	6.30765	6.55751	6.25321	6.27929	6.37863	5.96067	5.98602	5.96747
205904_at	5.79712	5.58416	5.35676	5.52739	5.41683	5.63151	5.34994	5.60354	5.20852	5.36693	5.21583	5.17843	5.48948	5.23545	4.88265	4.58482	4.82101	4.76875
205925_s_at	5.21273	5.20366	4.94343	4.89913	4.51189	4.67028	4.50534	4.54475	4.40097	4.51367	4.36879	4.29106	4.40201	4.35936	4.32483	4.16992	4.23229	4.34543
205932_s_at	9.56553	9.52825	9.42067	9.32597	9.2038	9.26487	8.88741	8.63037	8.87629	8.52616	8.73708	9.05093	8.84155	8.75451	8.78337	8.90977	8.8691	8.66907
205935_at	7.56413	7.67192	7.41895	7.79025	7.59131	7.39198	7.38159	7.15721	7.24795	6.7337	6.7719	7.00124	6.65569	6.63235	6.99746	6.63645	6.62354	6.56626
205975_s_at	7.65261	7.416	7.37403	7.78484	7.61612	7.58387	7.72846	7.71727	7.63111	7.42275	6.90454	7.00502	6.89006	6.7342	6.45853	6.55561	6.65506	6.38144
206052_s_at	8.96395	8.92996	8.8921	8.91523	8.6625	8.77546	8.76898	8.72048	8.28973	8.4824	8.3032	8.55162	8.35377	8.05483	8.24378	8.32825	8.39035	8.32491
206062_at	6.65267	6.49509	6.28896	6.07803	5.83653	5.97105	5.81209	5.90031	5.92444	6.02978	5.5408	5.7464	5.69556	5.56346	5.71228	5.40286	5.40675	5.67399
206074_s_at	10.4305	10.1895	10.2351	10.454	10.468	10.3718	10.5363	10.7379	10.2831	10.2482	10.31	10.2536	10.0372	10.0317	10.0495	9.78885	9.76563	9.79446
206116_s_at	9.9392	9.95653	9.94033	10.3908	10.379	10.4396	10.2738	10.2525	10.094	9.93492	9.91859	9.86853	9.48851	9.49529	9.42534	9.42953	9.39886	9.44519
206117_at	8.96783	9.0605	8.96955	10.1451	10.2485	10.1447	10.0484	10.019	9.97325	9.63157	9.83397	9.61224	9.3371	9.31134	9.4191	9.10717	9.2308	8.90054
206122_at	5.90642	5.82831	5.71759	5.72126	5.66068	5.55927	5.48474	5.56246	5.39348	5.04165	4.92884	5.07426	4.99275	5.14321	5.09802	4.78422	4.78307	4.85815
206200_s_at	8.16106	8.32781	8.28232	8.01657	8.00327	8.0435	7.8137	7.63427	7.79699	7.66896	7.59015	7.45202	7.43337	7.19033	7.49266	7.41544	7.52223	7.28242
206296_x_at	7.13857	6.86364	6.80529	6.61143	6.66202	6.66304	6.38116	6.50137	6.12883	6.51861	6.14982	6.22028	6.21953	6.24076	6.00375	6.03702	5.92644	6.19915
206383_s_at	8.1132	8.05117	8.02141	7.79858	7.75089	7.67287	7.64079	7.53844	7.35486	7.40823	7.49525	7.40421	7.422	7.22055	7.34036	7.38128	7.4743	7.31891
206578_at	4.71288	4.7474	4.67819	5.50226	5.64688	5.5896	5.08118	5.26545	5.28548	5.19322	5.23659	5.2623	5.00861	4.92894	4.97803	4.73751	4.76529	4.86735
206667_s_at	4.77402	5.25746	4.83682	4.68584	4.47008	4.47489	4.69546	4.61206	4.43897	4.45071	4.35911	4.5566	4.2148	4.1985	4.41658	4.03795	4.22597	4.10709
206686_at	7.02966	7.295	7.1288	7.83315	7.59488	7.55509	7.34922	7.40687	7.68726	7.11808	7.11737	6.57386	6.24946	6.59902	6.28669	6.03994	5.90834	5.74849
206751_s_at	4.79297	5.17126	4.99499	4.98886	4.45824	4.63854	4.38086	4.46837	4.21498	4.43288	4.22421	4.21073	4.2891	4.141	4.20806	4.14441	4.28719	4.13423
206801_at	5.28099	5.35645	5.51655	7.3808	7.3051	7.51553	7.32939	7.09685	7.44761	7.45499	7.40019	7.06053	6.43459	6.19239	6.05055	5.77871	5.76997	5.82945
207011_s_at	8.05763	8.0357	8.02562	8.25667	8.11146	8.0841	7.73832	7.77306	7.73404	7.45694	7.49498	7.35373	7.70704	7.55616	7.21731	7.51184	7.73107	7.49236
207069_s_at	6.80496	7.00312	6.88702	6.86656	6.68412	6.70047	6.58779	6.66535	6.43025	6.09419	6.44863	6.41599	6.34447	6.27049	6.3943	6.27307	6.29485	6.17817
207267_s_at	4.85879	4.68643	4.79504	4.57295	4.52774	4.72629	4.65367	4.7374	4.65044	4.67117	4.40098	4.4837	4.24283	4.41315	4.32162	3.82444	4.046	4.15078
207279_s_at	5.73305	5.83506	5.59877	5.93405	5.92515	5.48978	5.7583	5.79915	5.70448	5.52242	5.55487	5.24016	5.02561	5.15737	5.31176	5.17221	4.94707	5.01655
207457_s_at	5.28964	5.27458	5.48333	6.0765	5.89647	5.48476	5.20743	5.10471	5.3771	4.83892	4.80775	5.02887	4.81228	4.82114	4.75766	4.8451	4.72253	4.64483
207620_s_at	6.25188	6.77241	6.80178	7.03857	6.59693	6.59808	6.72153	6.63094	6.77196	6.31945	6.16259	6.20916	6.23058	6.05643	6.35102	6.17832	6.28754	5.81632
207644_at	6.56978	6.35321	6.55214	6.23156	6.10268	5.88554	5.86158	6.10815	5.8682	5.88823	5.75701	5.74694	5.67813	5.84705	5.78478	5.62663	5.52964	5.5466
207714_s_at	10.2128	10.204	10.235	10.2204	10.2954	10.2809	10.109	9.89642	9.71533	9.74362	9.71272	9.59177	9.48984	9.34001	9.40039	9.61045	9.61679	9.59967
207747_s_at	5.91723	6.03618	5.79098	6.15601	6.22343	6.12569	5.83546	5.8658	5.94342	5.56642	5.61564	5.70656	5.43886	5.45781	5.44584	5.39415	5.46113	5.61057
207782_s_at	7.44395	7.64816	7.47305	7.63593	7.44038	7.5707	7.27752	7.23913	7.21898	6.88351	6.97251	7.21005	7.16265	6.97218	6.78301	7.05403	7.07996	7.11879
207845_s_at	5.74664	6.09496	5.7145	5.96204	5.52937	6.14185	5.78192	5.49755	5.69498	5.41346	5.3596	5.65407	5.22701	4.99418	5.42117	5.28058	5.46524	5.32587
207988_s_at	9.0441	9.16901	9.13764	8.85063	8.73163	8.85875	8.71837	8.54128	8.49383	8.19517	8.37956	8.43399	8.54228	7.9785	8.39604	8.51106	8.54811	8.44808
208113_x_at	10.9488	10.8602	10.933	10.9774	10.5939	10.7518	10.6986	10.7201	10.6741	10.5293	10.3157	10.3648	10.3318	10.1461	10.31	10.0711	10.1638	10.0079
208146_s_at	6.54079	6.25394	6.42832	6.49862	6.13229	6.43337	6.22054	6.04864	6.31129	5.76872	5.80768	5.90258	5.66541	5.93322	5.71124	5.77112	5.60244	5.72004
208195_at	6.70623	6.77517	6.79028	7.54516	8.0771	7.50683	7.6529	7.83176	7.64634	7.3203	7.58629	7.75017	7.84793	7.13008	7.45852	7.04856	7.27342	7.07596
208308_s_at	9.5831	9.75958	9.62073	10.0702	9.77461	9.97612	9.69222	9.50189	9.91638	10.0422	9.36892	9.45116	8.94548	9.21977	8.98354	9.11973	9.06253	8.89712
208319_s_at	8.21985	8.45082	8.23673	8.02945	7.83041	8.27365	7.91395	7.81737	7.75595	7.70142	7.48592	7.9232	7.68492	7.29466	7.9623	7.43551	7.73344	7.52711
208484_at	5.63436	5.45315	5.45498	5.82485	5.6124	5.63135	5.89357	5.9958	5.40632	5.42227	5.27571	5.42493	5.11931	5.33331	5.33253	5.15404	4.88126	5.29792
208636_at	8.93816	8.96468	9.05796	8.86649	8.70524	8.92464	8.63974	8.57885	8.61278	8.14841	8.4917	8.27554	8.22639	7.95026	8.11687	8.34281	8.40506	8.19322
208637_x_at	8.55248	8.42549	8.54366	8.40138	8.51348	8.37423	8.21889	8.01112	7.91999	7.66976	7.81921	7.83259	7.83041	7.66426	7.56614	7.89974	8.03067	7.84083
208638_at	9.79069	9.59054	9.61148	9.48748	9.34397	9.49579	9.32854	9.05521	9.0446	9.02584	8.92656	9.25018	9.00995	8.72915	8.90453	9.1287	8.91022	9.06173
208651_x_at	9.07441	9.4378	9.36474	9.08365	9.11964	9.07586	8.94391	8.85083	8.71153	8.51598	8.63361	8.66428	8.47707	8.55519	8.59459	8.67641	8.42998	8.49945
208653_s_at	7.16686	7.35105	7.11604	6.76462	6.86339	6.96504	6.91785	6.5625	6.64604	6.57059	6.4633	6.59734	6.52596	6.40436	6.49538	6.58364	6.5174	6.44641
208654_s_at	8.49347	8.75708	8.62284	8.53388	8.47167	8.49708	8.63015	8.4082	8.24091	8.094	8.09812	8.11692	8.08717	7.69347	7.88699	7.79803	8.11789	7.94256
208674_x_at	8.2836	8.07011	8.13537	8.14496	7.83996	7.9343	7.88015	7.61793	7.64555	7.53972	7.24331	7.618	7.39075	7.18233	7.34111	7.41544	7.37178	7.55066
208677_s_at	10.0314	10.0184	10.0503	10.2401	10.1046	10.1893	9.92796	10.0304	9.9194	9.71744	9.77785	9.78864	9.65425	9.48335	9.45776	9.42229	9.53379	9.38872
208680_at	11.5164	11.3523	11.3696	11.187	11.1576	11.1345	10.9985	11.0103	10.8273	10.7969	10.8161	10.8149	10.6882	10.6542	10.641	10.6183	10.7535	10.6748
208683_at	9.19997	9.28168	9.33183	9.15758	9.10743	9.15675	9.01099	8.9991	8.81443	8.70162	8.80372	8.70398	8.51084	8.60037	8.65001	8.84861	8.87374	8.86407
208704_x_at	9.7881	10.0303	9.93671	9.92712	9.83052	9.84109	9.7387	9.51525	9.49264	9.27963	9.29598	9.21133	9.12896	9.0723	9.01172	9.11514	9.10188	9.03735
208729_x_at	7.99819	8.07059	7.91023	8.08033	7.97582	7.87501	7.66717	7.13669	7.64	7.37295	7.69282	7.56849	7.21033	7.58651	7.62948	7.36537	7.32264	7.24126
208796_s_at	9.94819	10.1565	9.97993	10.1818	9.88278	9.9561	9.94465	9.76145	10.0135	9.80948	9.5741	9.75434	9.56218	9.30434	9.46029	9.34135	9.30683	9.24438
208809_s_at	7.12089	7.74152	7.64096	7.5082	7.24612	7.19757	6.99271	7.04068	7.07187	6.54525	6.81436	6.67672	7.01454	6.93147	6.9186	6.9282	7.11138	6.77402
208815_x_at	8.77561	8.88476	8.92954	8.77912	8.54401	8.54242	8.59489	8.49423	8.43106	8.06296	8.15307	8.48919	8.15745	8.0218	8.16431	8.29217	8.21959	8.14746
208836_at	9.88583	9.8407	9.87638	9.86628	9.78526	9.77658	9.67732	9.55269	9.44077	9.0346	9.46466	9.34359	9.46314	9.26917	9.24601	9.34286	9.37086	9.23455
208840_s_at	9.18182	9.24421	9.14571	9.03726	8.83653	8.84723	8.92732	8.86482	8.67458	8.54678	8.6489	8.72616	8.76977	8.3269	8.56276	8.62858	8.47375	8.36928
208855_s_at	10.0616	10.0991	9.95843	9.9752	9.77689	9.98477	9.91744	9.72115	9.9372	9.73333	9.45365	9.75266	9.54025	9.37076	9.39697	9.14447	9.3782	9.41822
208891_at	9.26965	9.31057	9.15738	9.68085	9.19543	9.44558	9.21053	9.15824	9.02738	8.79294	8.86274	8.74578	8.93179	8.29273	8.74058	8.26834	8.53492	8.5011
208892_s_at	8.62384	8.46397	8.61039	8.90918	8.58413	8.64903	8.45705	8.41933	8.24011	7.90754	7.96427	8.13279	7.93075	7.62446	7.94089	7.74985	7.59479	7.50562
208893_s_at	8.70411	8.86206	8.754	9.06746	8.77185	8.83482	8.62631	8.6574	8.48787	8.1736	8.37035	8.35736	8.12552	8.09858	8.08029	7.93445	8.10309	7.81052
208910_s_at	9.49216	9.44976	9.53666	9.37579	9.23371	9.47685	9.21406	9.28246	9.10036	8.82834	9.0128	9.1046	8.94294	8.57856	8.96308	8.73282	8.84274	8.57701
208913_at	7.16757	6.92572	7.06231	7.0672	7.05829	6.85035	6.94458	6.68493	6.65253	6.61394	6.32289	6.51287	6.23394	5.82785	6.15504	6.08346	5.96472	6.01273
208914_at	7.1854	7.26043	7.29764	7.64996	7.52725	7.54665	7.35809	7.38378	7.36266	7.17871	7.18865	6.93311	6.69205	6.72665	6.68217	6.74876	6.82851	6.81828
208915_s_at	8.80827	8.61279	8.63335	8.80654	8.73787	8.5806	8.55835	8.68754	8.59154	8.27509	8.38344	8.33807	8.31156	8.27917	8.15191	7.94061	8.01932	7.8697
208934_s_at	6.36912	6.45991	6.4363	7.0904	6.66884	7.0195	6.77572	6.40505	6.29059	6.20318	5.9471	6.08705	5.80606	6.1544	6.01909	5.9541	5.99421	5.80206
208975_s_at	8.64163	8.48918	8.35083	8.37121	8.19468	8.4851	8.19375	8.18437	7.99882	7.91454	7.82858	8.274	7.86079	7.8687	7.91254	7.58257	7.66946	7.71776
209007_s_at	8.94098	9.05639	8.98175	8.67618	8.64231	8.59061	8.59201	8.36216	8.44084	8.10036	8.33675	7.91373	8.33528	8.01426	8.29779	8.36368	8.41115	8.23226
209015_s_at	7.78545	7.68461	7.57723	7.35859	7.14187	7.4744	7.27719	7.05012	6.90433	6.79259	7.02413	6.99914	6.59245	6.60622	6.83927	7.05036	7.10942	6.85224
209028_s_at	6.07878	6.09164	6.01841	5.77022	5.48788	5.63074	5.78219	5.42198	5.35188	5.22824	5.2776	5.34759	5.32548	5.29486	5.4264	5.01873	5.24447	5.15101
209049_s_at	8.65144	8.52296	8.67902	8.35466	8.15579	8.17046	8.25331	8.16385	8.14388	7.70371	7.90455	8.1031	8.11413	7.61188	8.00808	7.89464	7.9024	7.88615
209081_s_at	8.36107	8.3891	8.35504	8.48132	8.33116	8.42799	8.48542	8.4836	8.33288	8.04857	8.07579	7.9622	8.04733	7.81869	7.82315	7.83564	7.89638	7.68596
209082_s_at	7.93243	7.89998	7.88038	8.13247	8.10173	7.89039	7.94526	7.94446	7.84319	7.63079	7.87612	7.67113	7.63129	7.50038	7.41476	7.24784	7.31218	7.29311
209109_s_at	9.7217	9.77786	9.70734	9.79619	9.45723	9.85332	9.53652	9.45855	9.5095	9.26225	9.3665	9.36264	9.18429	9.06024	9.23931	9.09506	9.15533	9.05669
209122_at	8.91458	8.8864	8.8488	8.9232	8.81421	8.9776	8.75094	8.38519	8.69374	8.58112	8.45284	8.53086	8.1912	8.42978	8.18583	8.35665	8.48179	8.26183
209140_x_at	8.55696	8.64502	8.51316	8.31683	8.31494	8.39068	8.04812	7.83016	8.08941	7.94012	8.18887	8.04637	7.72648	7.86523	8.10491	7.7695	7.98036	7.85518
209143_s_at	9.17433	9.08915	9.26828	9.14979	9.16215	9.36791	9.10439	8.96523	9.00802	8.88167	8.92379	8.94823	8.57466	8.64453	8.57765	8.52147	8.81972	8.59581
209157_at	7.68042	7.63073	7.51594	7.37861	7.08014	7.49731	7.25344	7.214	7.10093	7.40155	6.78484	7.25398	7.04567	6.84164	7.00435	6.98137	6.85639	7.07078
209181_s_at	9.1295	9.00665	8.96791	8.77262	8.60784	8.67718	8.76078	8.45217	8.55554	8.393	8.30989	8.57587	8.56134	8.0645	8.5143	8.18166	8.29226	8.20113
209242_at	9.65454	9.61699	9.67716	9.8061	9.94146	9.76189	10.2999	10.0388	10.239	10.1977	10.1152	10.1878	9.90893	9.63559	9.68524	9.35	9.45435	9.37667
209243_s_at	8.15799	8.43116	8.20045	8.13997	8.28679	8.13013	9.00415	8.74965	8.7804	8.45894	8.20325	8.86339	8.13591	8.129	8.12123	7.64254	7.63984	7.51303
209276_s_at	6.59337	6.71525	6.43485	6.63019	6.42978	6.36357	6.08097	5.97175	5.87654	5.86876	5.65485	5.82997	5.8446	5.6915	6.01508	6.3702	5.98488	6.08336
209305_s_at	6.6237	6.60428	6.40984	6.64156	6.7335	7.12307	6.86817	6.56865	6.49537	6.36844	6.38077	6.10497	6.1377	6.37498	6.11597	6.27066	6.16449	6.09945
209306_s_at	5.82992	5.97856	5.8948	5.52191	5.27211	5.32454	5.44657	5.28016	5.51944	5.19018	5.18222	5.07493	5.25855	4.97441	4.92538	5.04241	5.0416	4.60953
209367_at	6.53821	6.22007	6.15346	6.46528	6.37263	6.29138	6.16351	6.19331	6.29013	6.01555	6.03263	6.13982	5.81978	5.96361	5.88943	5.65386	5.9342	5.61524
209421_at	7.64195	8.08697	7.95727	8.05315	7.7047	7.5609	7.71528	7.60174	7.37809	7.08749	7.38176	7.54356	7.47184	7.13257	7.14959	7.26306	7.09688	6.89612
209422_at	8.00035	7.97835	7.91093	8.067	7.28114	7.73501	7.60174	7.32725	7.11105	7.15229	7.31436	7.18289	7.39488	6.64896	7.14716	7.22568	7.04563	6.96306
209433_s_at	7.70866	7.8999	7.92611	7.95831	7.93169	7.56829	7.83086	7.53941	7.58949	7.26316	7.35699	7.52423	7.45915	7.36091	6.96952	7.16434	7.29534	7.1452
209446_s_at	5.88073	5.72464	5.76676	5.79393	5.8975	5.93142	6.10464	5.63294	5.5703	5.61656	5.26699	5.59123	5.39751	4.91754	5.25596	4.8107	4.36284	4.64141
209566_at	6.97951	6.94867	6.97847	7.44031	7.21793	7.27434	7.3982	6.84557	7.60261	7.05124	6.77123	6.69183	6.44464	6.66718	6.23847	6.50295	6.50579	6.51897
209585_s_at	6.12464	6.39458	6.22556	6.08464	5.85079	5.90007	5.74629	5.7239	5.46373	5.38199	5.35269	5.89606	5.55277	5.31218	5.62326	5.60937	5.82232	5.52125
209642_at	8.32242	8.60784	8.54494	8.11114	7.89149	7.92808	8.11031	7.93759	7.77646	7.56324	7.50423	7.88974	7.72245	7.45446	7.70776	7.32871	7.34777	7.36441
209655_s_at	5.54209	5.60105	5.40785	5.86987	5.6912	5.73808	6.33091	6.28556	6.19474	6.00598	5.82716	5.95029	5.67919	5.59347	5.69665	5.80188	5.98246	5.55981
209656_s_at	7.96807	7.84278	7.74791	8.2481	8.03301	8.11896	8.6026	8.33313	8.3881	8.39499	8.29989	8.37334	8.06641	7.95299	8.03187	7.92876	8.00869	8.02781
209662_at	8.42837	8.55779	8.35507	8.39071	8.07971	8.13938	8.29222	8.04752	8.26431	7.93928	8.17094	7.96829	7.93178	7.77504	7.85754	7.7195	7.768	7.54509
209690_s_at	6.35689	6.42479	6.11486	6.55181	6.38067	6.43831	6.10009	6.21237	6.01399	5.86735	5.66026	6.04102	5.57398	5.48394	5.56869	5.7386	5.24098	5.33262
209722_s_at	5.12598	5.2296	4.9263	4.91669	4.68175	4.73151	4.60495	4.51136	4.48583	4.61802	4.29944	4.16958	4.28878	4.21091	4.21135	4.13274	4.24386	4.13348
209739_s_at	7.76639	7.67114	7.77924	7.51237	7.30445	7.58741	7.54395	7.07623	6.75501	7.42611	7.14663	7.33189	6.83023	6.98199	7.06671	6.83344	6.74054	6.89702
209796_s_at	8.24765	8.4354	8.25893	8.31112	8.12149	8.33075	8.07054	7.79209	7.63225	7.78085	7.7728	7.818	7.58853	7.50487	7.7304	7.83689	7.88859	7.8782
209815_at	9.65893	9.70024	9.65265	9.81911	9.37953	9.53432	9.23131	9.22999	9.34887	8.73903	9.19164	8.83869	8.82195	8.47444	8.73494	8.61907	8.81361	8.74544
209860_s_at	7.64473	7.89649	7.85053	7.83474	7.8314	7.72604	7.60751	7.45222	7.42834	7.11081	7.2873	7.55098	7.30976	7.31835	7.09209	7.45411	7.58984	7.29134
209890_at	7.34328	7.59896	7.37084	7.51509	7.19795	7.39048	7.40152	6.99336	7.15646	6.89431	6.56954	6.98414	6.37836	6.94889	6.75161	6.7249	6.90668	6.66496
209891_at	6.36757	6.43038	6.27144	5.99914	5.75739	5.96638	5.92714	5.77269	5.61306	5.51874	5.96736	5.57138	5.65173	5.204	5.79107	5.60116	5.52758	5.57932
209904_at	7.03835	7.03923	7.06776	8.49935	8.5582	8.62537	8.22448	8.27509	7.86655	7.83733	8.1683	8.20727	7.63202	7.31188	7.63846	7.51996	7.61426	7.69093
209921_at	5.44448	5.64072	5.69095	6.01423	5.87752	5.43988	5.51472	5.27883	5.44589	5.32876	5.62705	4.74899	4.99318	4.94523	4.91828	4.88446	5.08637	4.79417
209933_s_at	5.99398	6.06089	6.04035	5.96503	5.62181	5.68965	5.76998	5.49303	5.73442	5.63543	5.59889	5.13442	5.32655	5.39065	5.40178	5.17016	5.3642	5.31727
210088_x_at	9.14666	9.065	8.95678	10.0628	10.0734	10.0096	9.71474	9.89796	9.38126	9.59329	9.81079	9.71898	9.38839	9.27411	9.38874	9.17897	9.21542	9.24837
210103_s_at	6.52209	6.45712	6.65034	6.36254	6.00657	6.12022	6.20299	6.25521	6.12482	6.08358	5.97152	5.80662	5.76717	5.67485	5.9644	5.75965	5.60117	5.88303
210150_s_at	7.26265	7.31947	7.37905	7.5423	7.69393	7.53598	7.46177	7.54256	7.55631	6.94427	7.42895	6.85358	7.00079	6.92584	7.00327	6.63908	6.73926	6.65815
210260_s_at	6.80304	7.04855	6.88246	6.84138	6.49063	6.69711	6.70072	6.62139	6.72881	6.44954	6.31831	6.39825	6.47942	5.88739	6.34439	6.47159	6.5834	6.56017
210395_x_at	9.21602	9.2652	9.08959	10.2864	10.3219	10.2087	9.91546	10.0295	9.62967	9.6319	9.88891	9.986	9.49267	9.49832	9.5264	9.26096	9.29975	9.24432
210457_x_at	7.6697	7.59521	7.61035	8.37065	8.53132	8.40415	8.54903	8.55489	8.11902	7.85397	8.10336	8.31263	7.99709	7.77632	7.83083	7.76532	7.68221	7.62623
210466_s_at	10.6497	10.5488	10.6386	10.4051	10.3077	10.3349	10.4078	10.311	10.2971	10.1856	10.0486	10.2417	10.0542	9.97672	10.1549	9.89949	9.84462	9.78759
210513_s_at	7.43761	7.45105	7.3281	7.70767	7.9144	7.78862	7.87793	7.44313	7.71156	7.51805	7.33209	7.24607	6.69079	7.08222	6.88465	6.04367	6.48773	6.12626
210594_x_at	8.01847	8.16846	8.08381	7.96254	7.78119	7.80308	7.64889	7.59466	7.53739	7.43815	7.37915	7.50972	7.49462	7.32264	7.37082	7.17374	7.25861	7.0384
210605_s_at	7.39813	7.48765	7.5011	7.72715	7.65187	7.62445	7.342	7.06947	6.95998	7.01277	6.97926	6.94955	6.64365	6.80118	6.56235	6.59403	6.75646	6.70399
210639_s_at	7.0324	6.95178	6.82626	6.75532	6.64087	6.76005	6.50128	6.64749	6.43902	6.49164	6.49219	6.3211	6.16066	6.11277	6.32091	6.03133	6.29996	6.21114
210658_s_at	8.23637	8.21354	8.23547	8.52982	8.3715	8.3429	8.20257	7.85698	8.33717	7.76728	8.03402	7.76238	7.56471	7.47781	7.36357	7.34783	7.44155	7.36576
210683_at	4.84836	4.93093	4.6967	5.18952	4.95529	4.9229	5.30782	5.23656	4.95692	4.72943	4.66097	4.77992	4.55056	4.3873	4.62671	4.66035	4.45024	4.35802
210691_s_at	7.44752	7.40564	7.30905	7.05511	6.9479	7.31104	7.13629	6.76717	6.71266	6.7917	6.75942	6.71557	6.56699	6.24059	6.69804	6.56125	6.8517	6.50997
210827_s_at	6.48445	6.72191	6.44456	6.4737	6.65784	6.52056	6.3246	6.39219	6.23025	6.54371	6.36222	6.01325	5.94055	6.00834	5.90059	6.0576	5.90281	5.93015
210907_s_at	9.06507	9.25827	9.07253	9.21935	8.89736	9.00907	8.88897	8.63832	8.73376	8.54763	8.48147	8.78623	8.32864	8.58885	8.54384	8.69722	8.46518	8.41039
210930_s_at	5.52179	5.59617	5.5611	5.31042	5.29201	5.0382	5.04825	4.99236	4.95442	4.82485	4.69596	4.86117	4.88894	4.72516	4.89227	4.72921	4.80787	4.77699
210948_s_at	5.34142	5.31197	5.19028	5.56597	5.53197	5.05806	5.27904	5.32961	5.12878	5.00383	4.60737	4.91709	4.77871	4.72779	4.59649	4.60657	4.67027	4.75433
210964_s_at	7.27864	7.52008	7.4282	7.51256	7.40273	7.23554	7.51106	7.15503	7.10615	7.09403	7.10887	7.02916	6.41836	6.67681	6.84687	6.49761	6.28872	6.3778
210986_s_at	10.7324	10.6125	10.6099	10.61	10.5814	10.5834	10.6167	10.4754	10.2986	10.0613	10.1537	9.99589	9.66858	9.36608	9.63948	9.73327	9.77193	9.66315
210987_x_at	10.2615	10.3899	10.4196	10.3923	10.5551	10.4337	10.3756	10.3466	10.1724	10.012	10.0846	10.0189	9.77471	9.62334	9.71217	9.73786	9.81511	9.76543
211023_at	9.71315	9.52422	9.62215	9.31788	9.1901	9.39485	9.16653	9.08277	9.05336	8.95048	8.76805	9.11404	8.78577	8.64549	8.92952	8.96916	8.98942	8.98226
211150_s_at	7.86799	7.80232	7.75276	7.65057	7.53187	7.67331	7.56548	7.51289	7.35228	7.22539	7.32042	7.40001	7.25903	6.99105	7.13449	7.01728	7.17261	7.03043
211160_x_at	7.66803	7.63416	7.54339	7.69371	7.6902	7.65926	7.5372	7.33068	7.318	7.01987	6.96489	7.10776	7.03074	7.31455	7.02815	7.22157	7.10209	7.21668
211431_s_at	6.5687	6.49491	6.75702	6.92603	6.9774	6.63022	6.80093	6.69145	6.66445	6.19595	6.43836	6.19289	6.05494	6.04493	6.09664	5.99127	5.94052	5.94694
211432_s_at	8.63341	8.6258	8.52617	8.85773	8.72458	8.62854	8.68699	8.4386	8.27375	7.90811	8.00825	7.80666	7.89148	7.64497	7.57751	7.67953	7.52084	7.62652
211473_s_at	6.413	6.42538	6.50923	6.64446	6.30194	6.29544	6.11323	6.43753	6.41666	5.91255	5.94758	5.80676	6.02358	6.07361	5.9633	5.74051	5.67842	5.78507
211518_s_at	8.4514	8.48714	8.59982	8.74713	8.66503	8.65842	8.44355	8.19488	8.28496	8.04691	8.12949	7.98312	7.84426	7.8612	7.76142	7.73939	7.92098	7.67424
211527_x_at	7.15401	7.08422	7.18498	7.51664	7.73386	7.53459	7.49991	7.14736	7.51502	7.47006	6.74582	6.9716	6.60376	6.55	6.05857	6.20086	5.98443	6.14533
211538_s_at	6.30913	6.52087	6.42142	6.48184	6.13013	6.38439	6.0095	5.86866	5.85012	5.95144	5.81642	5.65281	5.71483	5.69126	5.81159	6.26415	6.1547	5.88371
211911_x_at	8.2866	8.18882	8.10561	7.91629	8.02254	7.9085	7.62845	7.31208	7.68005	7.51765	7.76922	7.4988	7.28543	7.32706	7.56313	7.47896	7.67362	7.45467
211926_s_at	7.99269	7.95844	7.97366	8.05394	8.03798	7.99923	7.86327	7.9645	7.75473	7.2455	7.68572	7.56447	7.264	7.3546	7.08224	7.34347	7.26295	7.53849
211936_at	10.9275	11.0037	10.9617	10.5877	10.7563	10.8555	10.6688	10.4024	9.95057	10.2714	10.0001	10.3521	10.0392	9.94488	10.044	10.3747	10.321	10.3464
211937_at	10.4128	10.3993	10.3034	10.4041	10.3279	10.3264	10.1713	10.2285	10.3641	10.2407	10.0539	9.98027	9.72165	9.95261	9.84702	9.89566	9.89946	9.7623
211967_at	8.54481	8.91263	8.72399	9.03514	8.48531	8.63307	8.85122	8.76452	8.69305	8.72013	8.40494	8.52754	8.45087	8.02257	8.49076	8.19368	8.1563	7.88778
212053_at	7.72122	8.01169	7.90339	7.86353	7.54138	7.76908	7.55864	7.50399	7.35883	7.08427	7.3052	7.19711	7.27661	6.99588	7.16279	7.36363	7.51185	7.12335
212171_x_at	8.63561	8.67258	8.58994	9.06214	9.03307	8.95507	9.01024	8.68808	8.99273	8.84757	8.7311	8.4064	8.22065	8.24401	7.99643	7.81065	7.70867	7.88432
212293_at	7.50139	7.58576	7.64751	7.50913	7.17401	7.27045	7.21255	7.22465	7.18187	7.08417	7.07442	6.95856	7.05311	6.88808	7.06386	7.17919	6.9665	6.86177
212361_s_at	8.29836	8.13262	8.34404	9.13888	9.14329	8.98441	8.94866	8.99966	8.83824	8.55084	8.85248	8.66879	8.72677	8.32258	8.62693	8.61336	8.61389	8.39505
212417_at	6.50504	6.9276	6.77241	6.75271	6.4228	6.32816	6.51173	6.5319	6.41414	6.24091	5.97247	6.47001	5.79177	6.00465	6.25421	6.17725	5.89743	5.94313
212432_at	7.6673	7.55512	7.71865	7.71614	7.49454	7.72758	7.30431	7.14564	7.45854	7.16359	7.06156	7.07328	6.88741	7.06523	6.88814	6.91082	7.16797	6.95593
212434_at	7.41569	7.61412	7.4963	7.46903	7.10109	7.71074	7.14405	6.87116	7.30355	7.00803	6.70411	6.86933	6.75292	6.71301	6.64044	6.55684	6.65271	6.6363
212445_s_at	6.64803	6.84924	6.54766	6.69583	6.49765	6.45356	6.32506	6.29323	6.24897	6.32017	6.16816	6.04008	5.87788	6.02363	6.0514	6.15464	6.31976	6.32925
212449_s_at	8.80182	9.031	8.85334	8.72158	8.34162	8.78062	8.68836	8.56981	8.32011	8.14895	8.00012	8.36606	7.99069	7.90945	8.23839	8.30971	8.1267	8.0395
212461_at	9.15895	9.35948	9.30475	9.10148	8.8891	8.96212	8.7902	8.76269	8.46769	8.54339	8.50104	8.64538	8.65022	8.15773	8.51261	8.60418	8.56654	8.62279
212473_s_at	6.50823	6.30285	6.53595	6.09839	6.11547	6.31809	6.00971	6.42712	5.86653	5.94892	6.17208	5.9896	5.90257	5.94065	5.56108	5.38372	5.60844	5.34466
212488_at	8.97517	9.02279	8.89529	8.82269	8.64221	8.78949	8.74487	8.45511	8.46922	8.32131	8.18268	7.97452	8.09768	7.875	7.89744	8.34231	8.34216	8.24205
212489_at	7.22664	7.27146	7.38836	7.20084	7.00116	7.41813	7.21262	7.0801	7.14276	6.48498	6.40843	6.20842	6.47013	6.40466	6.03865	6.65867	6.49533	6.39039
212533_at	9.16408	9.39151	9.38135	9.15199	8.91765	9.08404	9.11159	9.12016	8.8164	8.89278	8.58037	8.89857	8.93748	8.71374	8.84523	8.71732	8.62145	8.63652
212538_at	5.54349	6.03976	5.90684	6.15037	5.78571	6.04364	5.9744	5.87927	5.95689	5.35726	5.53924	5.26665	5.31957	5.04979	4.87254	4.95221	5.11391	4.79859
212558_at	7.68244	7.61647	7.77171	8.41001	8.01524	8.27832	8.31121	8.13954	7.99514	7.84232	7.73157	7.88434	7.36733	7.42874	7.57753	7.28853	7.09096	7.14134
212640_at	6.58998	6.88063	6.99225	6.60054	6.68343	6.55056	6.71807	6.51979	6.18825	5.92218	6.29863	6.27242	6.23892	5.82732	6.12123	6.13359	6.53989	6.06302
212658_at	7.72738	8.10086	8.04477	8.32357	7.96103	7.94835	7.7386	7.65435	7.6619	7.26474	7.46697	7.13088	7.22011	7.2653	7.34125	7.31593	7.30859	7.18632
212688_at	5.66894	6.18454	5.89824	5.76759	5.35207	5.52886	5.52527	5.47049	5.42798	5.31817	4.8846	5.34094	5.09482	4.82818	5.03117	5.1277	4.96104	4.89378
212689_s_at	8.84436	8.88586	8.84162	9.10627	8.87835	9.06137	9.00349	8.77226	9.2675	8.97435	8.53536	8.67303	8.30685	8.39429	8.25937	8.21244	8.01355	8.17599
212692_s_at	8.01106	8.19132	8.1464	7.96558	7.83019	7.86696	7.70676	7.63605	7.51145	7.24362	7.46032	7.52902	7.53698	7.12868	7.20974	7.53404	7.64726	7.55494
212719_at	5.73647	6.10593	5.95717	6.16903	5.87768	5.89679	5.64612	5.65496	5.38213	4.87344	5.31803	5.39454	5.45721	4.90848	5.22629	5.53676	5.50497	5.3995
212769_at	6.3471	6.14223	6.01959	6.3969	6.16822	6.2626	5.92086	5.69746	5.83426	5.70155	5.73784	5.85374	5.73759	5.47337	5.66983	5.77941	5.76035	5.5742
212773_s_at	9.37038	9.32433	9.18502	9.21222	8.87624	9.07055	8.90753	8.738	8.92064	8.887	8.74719	8.79625	8.50267	8.46412	8.48032	8.55786	8.732	8.47787
212816_s_at	8.21012	8.09569	7.96398	8.19767	8.26506	8.24712	8.19213	8.04932	7.99779	7.72736	7.66245	7.79541	7.67248	7.17729	7.49063	7.19881	7.26526	7.2229
212838_at	8.0993	8.05483	8.16982	7.90182	7.68159	7.89261	7.69437	7.83887	7.43022	7.30035	7.58124	7.31428	7.2675	7.12555	7.21446	7.08017	7.29067	7.05662
212864_at	7.21252	7.12331	7.24959	7.1233	6.97729	7.04846	6.68772	6.59365	6.53965	6.23363	6.45744	6.50076	6.35558	6.55551	6.46538	6.75792	6.7834	6.52199
212873_at	7.0997	6.93652	7.08134	7.04321	7.33013	7.03362	7.04901	6.78923	7.25877	6.79697	6.61159	6.49531	6.3889	6.54517	6.1902	6.20603	6.2019	5.90256
212876_at	7.44752	7.35147	7.3599	7.26159	7.26447	7.18554	6.98226	7.04755	6.82366	6.7668	6.78469	6.69641	6.73291	6.57068	6.52686	6.71705	6.79079	6.74962
212915_at	6.76474	6.94278	7.02043	7.35547	7.04318	7.36534	7.25793	6.79144	7.02331	6.61992	6.75241	6.80686	6.69845	6.40481	6.34401	6.41103	6.54307	6.4517
212944_at	8.58061	8.9114	8.79231	8.99364	8.62033	8.40044	8.64529	8.47365	8.20127	8.27918	8.04427	8.25735	8.10548	7.81512	8.15418	7.94589	8.08998	8.03252
213005_s_at	7.33826	7.60617	7.49576	7.28851	7.13485	7.34904	7.18262	7.02922	7.05035	6.63783	6.75061	6.79919	6.84241	6.72079	6.84549	6.88977	7.03143	6.86422
213009_s_at	8.80021	8.79988	8.88905	8.36799	8.65321	8.54648	8.41865	8.27746	8.09797	8.00889	8.1658	8.32915	8.11879	8.05042	8.18561	8.14302	8.34056	8.06906
213011_s_at	11.1221	11.0679	11.0751	11.4617	11.3136	11.3327	11.223	11.0358	11.2964	11.005	10.821	10.7431	10.4799	10.5823	10.4794	10.5181	10.5008	10.3528
213182_x_at	8.44631	8.39703	8.37578	8.22119	8.23391	8.42113	8.41763	8.07055	8.0896	7.77453	7.977	7.89063	7.8176	7.62308	7.63105	7.94417	8.0363	7.8341
213261_at	6.24004	6.14679	6.28542	6.58618	6.83928	6.38571	6.73583	6.92711	6.64928	6.72627	6.39704	6.5544	6.19434	6.21847	6.09877	5.82393	5.64808	6.03214
213348_at	9.69292	9.54643	9.50838	9.37755	9.38568	9.47269	9.53844	9.15325	9.23636	8.94109	8.68918	9.15114	8.97632	8.82695	8.9034	8.96094	8.81279	9.12495
213400_s_at	8.07089	8.26385	8.07233	7.91924	7.81022	7.94463	7.76205	7.61338	7.58508	7.55458	7.3454	7.61215	7.54971	7.16064	7.46674	7.41925	7.40486	7.29294
213428_s_at	9.33099	9.3387	9.39784	9.25396	9.49137	9.38795	9.18973	9.25236	9.15182	8.77218	8.92911	8.6819	8.70106	8.52778	8.61046	8.65699	8.89506	8.69698
213457_at	6.71899	7.2549	7.01822	7.1632	6.54116	6.85179	6.90072	6.58503	6.37474	6.12188	6.04363	6.34479	6.3651	5.90783	6.0561	6.18387	6.09113	6.3079
213513_x_at	8.41969	8.78184	8.66305	8.32857	8.28249	8.42135	8.30021	8.03863	8.05813	8.01318	8.12446	7.92047	8.01764	7.55655	8.12556	8.18647	8.07175	8.16613
213524_s_at	5.19832	5.13588	5.09303	4.75208	4.82955	4.64317	4.54434	4.80793	4.51954	4.54598	4.46652	4.30392	4.33229	4.40358	4.37875	4.36303	4.10615	4.28853
213546_at	6.90584	6.87411	7.07973	6.62279	6.76465	6.35725	6.4226	6.41335	6.13145	6.20283	6.18836	6.10412	6.29981	5.95241	5.92975	5.93203	5.93292	6.05321
213571_s_at	7.83799	7.67967	7.85118	7.62389	7.29529	7.63403	7.37866	7.05727	7.01242	7.16842	7.16859	7.27177	6.98385	6.88251	6.85493	7.31249	7.45683	7.15574
213599_at	7.6426	7.58321	7.5391	7.33966	7.23236	7.39339	7.08882	7.11329	6.96685	6.9146	7.00333	6.92487	7.05222	6.59058	6.88209	6.94737	7.05182	6.76521
213700_s_at	6.7318	6.65293	6.72279	7.00404	7.16359	7.14833	7.02083	7.00654	6.84016	6.74228	6.73582	6.56248	6.54319	6.57294	5.94351	6.06944	6.17528	5.94982
213772_s_at	7.67975	7.80368	7.78875	7.95752	7.75568	7.86225	7.59189	7.56798	7.63614	7.4482	7.38148	7.35587	7.13402	7.36733	7.09066	7.21815	7.11414	7.26518
213793_s_at	7.13982	7.14034	7.03272	7.06414	7.0714	6.87453	7.03484	6.75375	6.78239	6.51272	6.57132	6.49091	6.50595	6.28679	6.41908	6.38822	6.62868	6.50549
213892_s_at	7.90116	7.88676	7.76388	7.79947	7.90142	7.88271	7.80671	7.63182	7.48149	7.258	7.48133	7.5181	7.26018	7.21758	7.24951	7.13421	7.25595	7.0481
214109_at	5.92522	6.22597	6.14054	5.79907	5.88923	5.88733	5.77988	5.4844	5.73904	5.55855	5.55678	5.58404	5.91846	5.40841	5.54047	5.54424	5.66598	5.45029
214190_x_at	6.81063	6.68121	6.76452	6.95239	6.69104	6.69872	6.62485	6.51002	6.58807	6.18165	6.39152	6.26204	6.11617	6.02716	6.00266	5.99874	6.00411	5.88107
214196_s_at	6.8556	6.91392	6.8419	6.70846	6.64304	6.76121	6.52871	6.35161	6.52948	6.19587	6.33969	6.39608	6.17704	6.23196	6.28079	6.1148	6.01394	6.13661
214219_x_at	7.08877	6.81853	6.9004	6.63486	6.61122	6.47683	6.25157	6.20459	6.11626	6.65172	6.37936	6.28472	6.42879	6.17357	6.00765	6.06997	5.76006	6.25036
214264_s_at	6.95287	7.30459	6.93145	6.67929	6.71766	6.45862	6.6202	6.571	6.5085	6.34878	6.41376	6.27071	6.32221	6.11485	6.30254	5.97305	6.1999	5.98513
214290_s_at	9.66781	9.6522	9.56372	9.41244	9.35232	9.49102	9.34562	9.10365	8.80833	8.94049	8.5855	8.57594	9.02449	8.7619	8.76546	8.99679	9.08504	9.03198
214339_s_at	6.46071	6.1927	6.26414	6.14027	6.18619	6.23731	5.88705	5.93379	5.78407	6.06054	5.86154	5.65215	5.7844	5.85925	5.85798	5.52023	5.48678	5.7292
214396_s_at	6.59748	6.59459	6.70593	6.70239	6.57374	6.62697	6.31338	6.32571	6.35463	5.99108	6.34038	6.02685	5.84841	5.87482	5.88096	5.8786	5.73143	5.78705
214435_x_at	6.1066	6.40102	6.07749	5.85346	5.51265	5.89439	5.61051	5.49332	5.45842	5.54806	5.09386	5.51432	5.41443	5.09334	5.36965	5.10925	5.37694	5.26107
214437_s_at	7.98198	8.19586	8.18959	8.65002	8.33281	8.4958	8.42133	8.10214	8.47743	8.33925	8.26263	7.94681	7.78248	7.55597	7.74127	7.71456	7.72872	7.44609
214438_at	6.13553	6.21828	6.07118	6.75271	6.80336	6.80648	7.09015	7.11238	7.01745	6.57328	6.76046	6.6647	6.48534	6.14183	6.5031	6.58773	6.57031	6.27159
214452_at	7.57608	7.76235	7.65747	7.99907	7.82888	7.67128	7.97761	7.6637	7.67597	7.77186	7.56914	7.6753	7.16768	7.06295	7.38348	7.0331	7.30005	7.06493
214468_at	7.41461	7.45858	7.4216	9.94368	9.8023	9.75588	9.28579	9.5418	9.46132	8.6442	8.78397	8.69257	8.34189	7.75975	7.92047	7.49556	7.47653	7.45932
214510_at	6.32352	6.48507	6.41213	6.68961	6.54662	6.73192	6.88637	6.50272	6.46439	6.10463	6.08618	6.09563	5.90713	5.96223	6.17593	5.79326	5.67588	5.64568
214544_s_at	6.51652	6.58257	6.47195	6.15432	6.1841	6.20693	5.9185	5.78565	5.81443	5.75011	5.93763	5.88963	5.7155	5.50454	5.85527	5.89025	5.69902	5.73158
214687_x_at	11.386	11.4636	11.4587	11.617	11.4262	11.4011	11.2404	11.0765	11.3623	11.3334	10.9959	10.9061	10.7407	10.7476	10.5407	10.4209	10.3821	10.3146
214845_s_at	8.59471	8.44361	8.31541	8.15224	8.19382	8.19237	8.14829	7.79971	7.72801	7.58053	7.75574	7.97347	7.8561	7.47038	7.5971	7.56865	7.81707	7.44937
214846_s_at	6.67181	6.93724	7.04773	7.0859	6.98106	6.76651	6.64551	6.49555	6.6273	6.37127	6.42882	6.31162	6.58378	6.15407	6.23452	6.37938	6.11612	5.99325
214895_s_at	7.26591	7.65524	7.40805	7.46844	7.10254	6.93933	7.136	6.91778	6.86806	6.84202	6.82305	6.87483	6.67538	6.3712	6.61984	6.61527	6.77813	6.4043
215001_s_at	10.0756	10.1758	10.1043	10.0979	9.83645	10.1029	9.85824	9.7137	9.70312	9.37376	9.38865	9.54443	9.43941	9.28141	9.40059	9.15004	9.40237	9.2315
215136_s_at	7.82265	7.96951	7.93523	8.12007	7.81408	8.08186	7.91056	7.58879	7.6964	7.53957	7.58684	7.86923	7.35169	7.08439	7.52201	7.42231	7.23062	7.20756
215157_x_at	11.7878	12.2598	12.2217	12.3512	12.0917	12.043	12.1257	12.1974	12.1049	11.7749	11.5959	11.7385	11.5567	11.5711	11.6192	11.574	11.4054	11.4129
215389_s_at	6.24567	6.45862	6.28473	7.99772	7.94565	7.90525	7.67871	7.65959	7.5574	6.8752	7.12699	7.01424	6.74838	6.52008	6.89507	6.47943	6.42054	6.53664
215438_x_at	8.29135	8.44938	8.34398	8.34842	8.07995	8.24327	8.28757	7.92847	8.01246	7.938	7.86961	8.07938	7.86894	7.57532	7.83041	7.7143	7.66386	7.63529
215708_s_at	6.58616	7.11956	6.83434	6.88513	6.49183	6.8055	6.74467	6.80283	6.58072	6.36674	6.3576	6.56525	6.42207	6.17694	6.48736	6.2068	6.19023	6.04385
215823_x_at	10.9459	11.0892	11.098	11.1394	10.9147	10.8344	10.8946	10.8693	10.7756	10.5771	10.464	10.2843	10.2382	10.2328	10.2679	10.1911	10.2165	10.1229
215947_s_at	8.6202	8.63493	8.61011	8.46542	8.32605	8.44673	8.14646	8.11473	8.08821	7.96981	8.01669	7.97159	7.74047	7.52689	7.83803	7.75244	7.92901	7.72219
216054_x_at	8.72832	8.65963	8.5058	9.78537	9.64058	9.61493	9.44084	9.4335	9.04105	8.96574	9.22305	9.46256	8.78906	8.92914	9.01061	8.66484	8.66187	8.71535
216266_s_at	7.54078	7.74468	7.57431	7.71503	7.24992	7.03199	7.25887	7.15566	7.22311	7.12964	7.24957	7.07862	6.95438	6.99868	7.17658	6.87546	7.05269	7.06101
216417_x_at	5.116	5.0185	5.145	6.28782	5.75455	5.87959	5.93128	5.93926	5.80123	5.49428	5.41863	5.46438	5.50678	5.37351	5.60271	5.62056	5.52087	5.33057
216568_x_at	5.0877	5.30139	5.15124	5.28867	5.2543	5.14293	4.96647	4.95869	4.94921	4.93726	4.85681	4.58144	4.40666	4.46535	4.60912	4.24317	4.46358	4.41879
216894_x_at	8.27961	8.45256	8.32878	8.25827	8.21587	8.44852	8.49473	8.15644	8.05243	7.741	7.92785	8.07518	7.7035	7.72909	7.6724	7.8529	7.85739	7.69293
216915_s_at	4.80474	5.46882	4.97827	5.07417	4.63043	4.76206	4.68838	4.69996	4.60519	4.62715	4.57621	4.57429	4.47548	4.40826	4.51916	4.45754	4.53341	4.564
216988_s_at	9.15806	9.08351	9.10383	8.99933	8.94442	9.00742	8.82035	8.71364	8.5932	8.47367	8.62467	8.63207	8.39503	8.36597	8.38991	8.57231	8.65203	8.64146
217028_at	8.40487	8.54851	8.64085	9.17582	8.55193	9.14378	8.81281	8.46471	8.79136	8.47901	8.31964	8.3617	8.28929	8.31979	8.118	8.36494	8.25146	8.20241
217127_at	4.93083	5.57174	5.47702	5.20748	4.9	5.27799	5.27532	5.06127	5.04846	4.99665	4.8793	4.98823	4.92002	4.76398	4.61623	4.25944	4.62313	4.56407
217168_s_at	8.80538	8.89204	8.52234	8.48738	8.60782	8.36942	8.55396	8.18872	8.21988	8.23609	8.26242	7.98603	8.05564	7.79114	7.93498	8.07803	8.163	8.05534
217188_s_at	8.28236	8.19773	8.15024	8.11988	8.0836	8.20108	7.91936	7.82748	7.67079	7.56778	7.64158	7.65881	7.61497	7.37592	7.70553	7.63876	7.53278	7.85262
217202_s_at	8.94138	9.11359	8.85599	9.06825	8.76206	9.01391	8.68676	8.43907	8.51622	8.40347	8.39465	8.58566	8.11721	8.19698	8.16319	8.39761	8.1443	8.29608
217266_at	8.85531	8.7227	8.68496	8.63271	8.40028	8.718	8.50495	8.56088	8.5913	8.59249	8.44272	8.27755	8.20786	8.28829	8.46541	8.16701	8.10051	7.97739
217294_s_at	11.9638	11.956	11.9189	12.0748	11.8197	11.9786	11.8091	11.6749	12.0165	11.8856	11.6213	11.2909	10.9724	11.136	11.1075	10.7059	10.7106	10.6838
217623_at	4.33991	4.34656	4.44723	5.23526	4.81598	4.73548	4.22208	4.42458	4.22128	4.00254	4.09606	4.04447	4.08683	3.99009	3.92561	3.7849	3.79515	3.7662
217691_x_at	8.12389	7.52314	7.74507	8.02893	7.9847	7.96853	7.74006	7.57196	7.89728	7.38088	7.38861	7.36496	7.35102	7.57457	7.258	7.2056	7.23382	7.46914
217738_at	6.42666	6.6454	6.4983	6.91792	6.56217	6.31632	6.52935	6.3491	6.59573	5.9847	5.9029	6.0684	5.85425	5.55354	5.54999	5.47857	5.6579	5.57163
217743_s_at	7.43056	7.35611	7.28139	6.98788	6.72485	6.79974	7.06708	6.68506	6.74387	6.74819	6.53724	6.8119	6.57645	6.2613	6.70755	6.31312	6.54739	6.65355
217752_s_at	8.69471	8.43089	8.59962	8.38007	8.33383	8.48724	8.24002	8.30539	7.91257	7.76363	8.06859	8.13029	7.76503	7.88983	7.91649	7.83484	7.98636	7.95172
217758_s_at	8.50224	8.53425	8.59785	8.30593	8.31201	8.1316	8.09411	8.04532	7.90013	7.88992	7.89421	7.79597	7.91265	7.50833	7.75237	7.57934	7.96287	7.60641
217762_s_at	7.64296	7.60492	7.716	7.48456	7.50556	7.62386	7.29287	7.29025	7.13022	6.90518	7.11289	6.71514	6.98603	6.65132	6.55787	6.9815	7.04298	6.88568
217764_s_at	8.50518	8.58361	8.49339	8.39935	8.17761	8.41684	8.08431	7.93678	7.69308	7.73822	7.76479	7.74158	7.72308	7.58292	7.68414	7.88368	7.96398	7.70862
217766_s_at	8.136	8.14155	8.27641	8.2189	8.10316	8.20747	7.94268	7.7605	7.76066	7.46672	7.27756	7.80889	7.45901	7.51992	7.56176	7.71714	7.75808	7.39219
217850_at	8.38262	8.42746	8.37459	8.62207	8.45082	8.3663	8.39432	8.14282	8.21517	8.17921	8.10127	8.24946	8.01999	7.74877	7.88262	7.73088	7.71314	7.80247
217871_s_at	12.0661	12.0502	11.9973	12.1076	11.9852	11.9969	11.8296	11.8494	11.7729	11.8516	11.886	11.6045	11.3951	11.4802	11.4098	11.4149	11.288	11.3676
217908_s_at	7.20918	7.20786	7.18934	7.00999	6.68352	6.93192	6.77684	6.62633	6.64953	6.5494	6.59569	6.40715	6.57635	6.39926	6.41337	6.55041	6.6276	6.45277
217933_s_at	7.67732	7.95802	7.7148	7.8	7.54911	7.78469	7.59237	7.25532	7.27408	7.27651	7.39615	7.34863	7.26477	7.0603	7.27965	7.42903	7.44387	7.16112
217938_s_at	9.04175	8.81103	8.97115	8.61421	8.51442	8.56258	8.33186	8.28882	8.36368	8.36178	8.32168	8.2749	8.17898	8.01669	8.04679	8.1013	8.24197	8.09765
218049_s_at	7.57615	7.50879	7.45607	7.47237	7.42228	7.52147	7.2838	7.03671	7.11694	6.99684	7.25404	7.08627	7.18016	6.79255	6.98499	6.58976	7.07607	6.8331
218073_s_at	5.96291	6.39336	6.43457	6.29619	6.10037	6.14959	6.06786	6.10813	6.3044	5.73649	5.73182	5.78929	5.64518	5.67991	5.62093	5.69632	5.71422	5.25746
218129_s_at	6.50198	6.61272	6.64566	6.55754	6.2497	6.35899	6.36201	6.01898	6.11897	5.98621	5.90513	6.02542	6.13862	5.60783	5.96438	5.87419	6.30696	6.14
218139_s_at	6.44483	6.81358	6.83651	6.82353	6.36369	6.54061	6.40669	6.29414	6.02239	5.93586	5.86974	6.21935	6.25068	5.75829	6.0936	6.38791	6.30823	6.28676
218149_s_at	8.02962	8.16911	8.16679	8.21976	8.0864	8.37105	8.32662	7.85385	8.44721	7.8716	7.8858	8.04442	7.66928	7.88834	7.68515	7.62591	7.80951	7.67367
218156_s_at	7.58379	7.94866	7.72005	7.94364	7.77183	7.88817	7.57022	7.51986	7.50111	7.36288	7.23407	7.51348	7.31306	7.04351	7.12474	7.18335	7.04787	7.06646
218205_s_at	8.60494	8.61425	8.55094	8.38566	8.23365	8.48236	8.17492	8.15248	7.96427	7.89707	8.02773	8.11057	7.93374	7.48642	7.87232	8.05944	8.14668	8.13766
218209_s_at	7.38496	7.71292	7.611	7.32517	7.09045	7.47717	7.19629	7.12769	7.27807	6.82523	7.23407	6.8949	6.46564	6.44998	6.98294	6.86711	7.0924	6.51235
218256_s_at	7.71274	8.19284	8.06345	7.86886	7.62331	7.60068	7.6545	7.51576	7.50914	7.37402	7.53482	7.43491	7.59245	7.38472	7.41107	7.29112	7.51662	7.272
218274_s_at	7.25127	7.42459	7.26345	7.71686	7.56218	7.42755	7.46003	7.20264	7.48433	7.22963	7.12755	7.04315	7.02285	6.89426	7.0874	6.8632	6.92702	6.8693
218280_x_at	7.89427	7.91983	7.84687	7.83919	7.92803	7.83604	7.79811	7.54336	7.15098	7.42353	7.06409	7.08578	7.49128	7.09929	7.30703	7.38787	7.54145	7.3057
218313_s_at	7.43074	7.98638	7.8879	7.8591	7.6399	7.3121	7.48765	7.30806	7.12206	7.06318	7.0925	7.26253	7.2884	6.70501	7.05703	7.27082	7.10279	7.019
218333_at	7.12717	7.19353	7.44736	7.11573	6.96708	7.13052	6.79747	6.63047	6.55338	6.80035	6.33685	6.87873	6.79778	6.29954	6.71932	6.62043	6.65336	6.75055
218361_at	7.1817	7.53335	7.3565	7.23964	6.99749	7.16395	6.92212	6.92644	7.08765	6.78443	6.86395	6.89514	6.81962	6.75845	6.84473	6.45025	6.7942	6.74321
218379_at	8.02158	8.11922	8.03007	7.7021	7.44148	7.81268	7.70642	7.38596	7.5684	7.35462	7.2858	7.45446	7.3288	7.09984	7.24072	7.20758	7.31301	6.94562
218398_at	6.91647	7.15367	7.14027	7.15381	6.93969	7.176	7.07041	6.80352	6.85791	6.75426	6.69447	6.78402	6.7688	6.33905	6.36582	6.24198	6.49485	5.88206
218461_at	5.9722	6.25849	6.24276	6.13824	5.88161	6.15658	6.13296	5.82095	5.98159	5.70472	5.79147	5.91691	5.40364	5.59361	5.70209	5.5642	5.4212	5.43739
218468_s_at	4.07117	4.08508	4.16969	5.30823	4.84075	5.14085	5.34991	5.23908	5.16234	4.78099	5.00608	4.67937	4.61572	4.11116	4.27425	4.35599	4.34926	4.09687
218469_at	4.43677	4.45272	4.3611	5.25953	4.96713	5.27947	5.36623	5.63488	5.23631	5.25556	4.76441	5.00251	4.72765	4.34523	4.73824	4.75396	4.63824	4.69026
218481_at	8.23491	7.95369	7.92099	8.10289	8.04733	8.09606	7.7834	7.84873	7.78961	7.68091	7.76039	7.65609	7.41272	7.6094	7.57604	7.30433	7.45644	7.39202
218499_at	8.68254	8.56129	8.79909	8.66588	8.41975	8.57568	8.5595	8.26716	8.2979	8.08024	7.92821	8.19597	8.09498	7.57703	7.63851	7.67016	7.6363	7.51787
218517_at	7.8626	8.10826	7.97465	7.83919	7.74165	7.6332	7.70054	7.57656	7.55218	7.27508	7.44678	7.39925	7.10893	7.35541	7.2337	7.19658	7.37988	7.41695
218592_s_at	8.033	8.30173	8.1996	8.2544	8.33613	8.29217	8.13023	7.99262	8.25684	7.92852	7.87427	7.99749	7.72056	7.71467	7.63079	7.6436	7.37786	7.63957
218595_s_at	8.0418	8.29745	8.13936	8.16729	7.72634	7.97537	8.00231	7.9091	7.83897	7.65754	7.74878	7.83559	7.72386	7.4484	7.5978	7.49789	7.34307	7.36619
218697_at	6.77731	7.07985	6.96133	7.17282	7.04995	7.06348	7.02214	6.91209	7.17512	6.76322	6.45698	6.67161	6.48166	6.56239	6.59039	6.47596	6.43402	6.26425
218775_s_at	6.31393	6.43165	6.2711	6.51268	6.2376	6.15349	5.94479	6.07662	5.8957	5.85873	5.9087	5.89123	5.80424	5.75821	5.60451	5.86602	5.94154	6.10151
218839_at	8.72821	8.9158	8.8618	8.98359	8.76857	8.99528	8.59095	8.56437	8.62754	8.5624	8.53137	8.34566	8.33056	7.98585	8.10232	8.04775	8.23149	8.05282
218848_at	6.81037	6.6155	6.55267	6.79681	6.76529	6.81641	6.52161	6.35385	6.27889	6.2627	6.19186	6.38391	6.01312	6.03915	6.15084	6.09889	6.323	6.1935
218856_at	8.3038	8.20038	8.24684	8.11083	7.90768	7.91053	7.92333	7.76678	7.61709	7.64795	7.52838	7.74072	7.48974	7.43727	7.52783	7.66991	7.56445	7.64881
218880_at	4.88006	5.04173	5.04201	4.82426	4.93103	5.02393	5.14171	4.9907	5.09907	4.67337	4.37013	4.29439	4.35327	4.59062	4.22807	4.27115	4.34045	4.33525
218963_s_at	4.63036	4.47457	4.55416	5.00257	4.55263	4.51358	4.47431	4.4141	4.41689	4.14408	4.36198	4.18736	4.0645	4.25937	4.04178	4.16992	4.01745	4.06556
218964_at	8.16102	8.13791	8.16978	8.50702	8.42105	8.43393	8.18819	8.12001	8.25818	7.92628	7.75519	7.70318	7.69456	7.49192	7.31548	7.318	7.34261	7.49473
218984_at	7.70317	7.92417	7.77472	7.91444	7.4801	7.78116	7.60272	7.59684	7.43044	7.15057	7.35448	7.32884	7.24301	6.79144	6.9605	6.73107	6.89795	6.76521
218995_s_at	5.18656	5.21827	5.23297	5.56226	5.37116	5.53885	5.83353	5.72072	5.81547	5.88064	5.7108	5.71909	5.16281	5.40806	5.53507	5.2974	5.25502	5.24666
219002_at	7.7984	7.93255	7.79098	7.84532	7.59415	7.44561	7.56157	7.42056	7.20411	7.41322	7.18928	7.2821	7.30509	6.78705	7.17325	6.88349	6.95009	6.94899
219080_s_at	6.39536	6.81699	6.5216	6.16956	6.2247	6.35959	6.157	6.05059	5.99111	5.91843	5.88736	5.96938	5.96863	5.77272	5.95538	5.91737	5.81872	5.74849
219143_s_at	5.50828	5.5677	5.29835	5.67639	5.36303	5.54171	5.23036	5.28042	5.03776	4.9598	5.11302	4.94015	4.64401	4.81798	4.72756	4.61368	4.24728	4.4897
219215_s_at	5.79163	6.33224	6.31201	5.9815	6.31121	6.09536	5.90529	5.92793	5.99319	5.53328	5.46629	5.62498	5.40364	5.65065	5.38035	5.48318	5.517	5.42525
219286_s_at	7.19214	7.60872	7.55815	7.43071	7.04733	7.19538	7.14641	7.06512	6.93902	6.89616	6.88485	7.01657	6.99712	6.78755	6.8812	6.8357	6.72201	6.86473
219317_at	5.17501	5.2734	4.99488	5.38746	5.28519	4.85059	5.08354	4.79665	4.8695	4.85423	4.65843	4.97022	4.79629	4.47516	4.52137	4.5031	4.46054	4.25182
219330_at	5.2124	5.02143	5.23494	4.89729	4.93103	4.94877	5.02546	4.94329	4.74688	4.5739	4.554	4.46571	4.78051	4.52454	4.58837	4.19903	4.61378	4.45117
219410_at	8.24972	8.20187	8.30237	8.57046	8.19948	8.68524	8.45634	7.75456	8.94763	8.61349	8.17678	7.97439	7.43642	7.68153	7.47344	7.11562	7.07159	7.24429
219412_at	6.11091	6.19345	5.96416	6.6089	6.27432	6.48317	6.70516	6.43001	6.42347	6.37307	6.03534	5.91138	5.69815	5.53748	5.56686	5.34913	5.36771	5.56722
219464_at	8.1141	8.15895	8.15659	8.08079	8.09472	8.1319	7.8995	7.94155	7.98736	7.74424	7.70552	7.68598	7.34268	7.78103	7.49685	7.12441	7.30787	7.37433
219534_x_at	8.62036	8.47819	8.50898	8.36683	8.41976	8.5124	8.60927	8.36758	8.13344	8.05365	8.10727	8.11442	7.99998	7.89431	7.83739	8.14724	8.08758	7.90486
219616_at	6.92064	7.02342	6.91278	6.84852	6.71828	6.52139	6.44456	6.35651	6.60306	6.57504	6.00648	6.10832	6.30273	6.30281	6.36896	6.22244	5.82205	6.26974
219622_at	7.53152	7.32713	7.34486	7.46843	7.42695	7.31276	7.24251	7.26473	7.82054	7.42368	7.02157	6.80624	6.88618	6.91089	6.76095	6.56951	6.47962	6.89248
219648_at	5.24101	6.11116	5.70134	5.58549	5.39886	5.52238	5.39858	5.20643	5.01334	5.00593	4.85825	5.1633	5.20378	4.63204	4.85299	4.80247	5.00547	4.90943
219654_at	6.27859	6.28236	6.10789	6.48213	6.5771	6.45136	6.30976	6.28886	6.16377	5.92777	6.11929	6.13273	5.79416	5.74986	5.86116	5.71541	5.79039	5.63385
219828_at	7.17776	7.04072	7.01962	7.1395	7.33958	7.10747	6.86444	7.05938	7.02039	6.94686	6.48834	6.67589	6.54557	6.77125	6.76524	6.14772	6.35085	6.64876
219888_at	5.75759	5.74246	5.64642	6.37396	5.38364	5.9869	5.48952	5.15713	6.36099	5.79605	5.76076	4.95932	4.6121	5.0459	4.50769	4.80884	4.50143	4.46763
220011_at	6.8346	6.72772	6.5871	6.67669	6.20572	6.57883	6.36912	6.74411	6.31602	6.28396	6.48627	6.30369	6.35625	6.10134	6.07079	5.97513	5.97991	5.88003
220065_at	4.80073	4.47565	4.3992	4.5569	4.41591	4.25159	4.20038	4.30921	4.09424	4.13667	3.91448	3.7545	3.87666	4.08	3.92192	4.1668	4.04504	4.00275
220147_s_at	10.4345	10.5689	10.5764	10.6485	10.5538	10.66	10.5288	10.4218	10.4729	10.3039	10.0729	10.1172	10.0112	9.8559	9.88073	9.92906	9.88502	9.74531
220340_at	6.90289	7.04967	7.03528	6.8593	6.99097	6.86394	6.80815	7.07513	6.99197	6.70796	6.80954	6.47325	6.60778	6.54941	6.37494	6.07661	6.12063	6.04037
220797_at	5.87044	6.02752	5.77996	5.78696	5.38723	5.79386	5.55262	5.54476	5.43969	5.44295	5.36737	5.6134	5.54757	5.19895	5.36959	5.21744	5.27877	5.17024
220942_x_at	10.1459	10.162	9.97036	10.5708	10.0994	10.2143	9.90142	9.42981	10.539	10.1541	9.70866	9.56237	8.76365	9.36863	8.74584	8.89543	8.89056	8.83169
220948_s_at	8.90855	8.98836	9.00226	9.16266	8.86775	9.03649	8.84122	8.68165	8.78769	8.38801	8.19094	8.5279	8.13066	7.98109	8.12172	8.19616	8.31115	8.20819
220987_s_at	7.72233	7.60937	7.76317	7.98186	7.80951	7.88538	8.10839	8.05813	7.68827	7.74734	7.59392	7.64711	7.29095	7.53969	7.40024	7.14966	7.32481	7.10636
221019_s_at	9.21487	9.28232	9.24173	9.17782	8.93015	9.14221	8.93861	9.00926	8.98572	8.6358	8.73579	8.47209	8.38009	8.27278	8.36256	8.24713	8.25001	8.09101
221215_s_at	7.86661	7.95424	7.93668	7.87055	7.97597	7.72529	7.60776	7.67307	7.63042	7.51393	7.35982	7.12624	7.33036	7.42432	7.20441	6.95297	6.95275	6.99496
221249_s_at	7.17354	7.20578	7.18231	7.4768	7.46414	7.56353	7.53682	7.31547	7.35731	7.22133	7.08707	7.17553	6.97169	7.04507	6.89634	6.93145	6.4806	6.81263
221482_s_at	7.75998	7.78015	7.80944	7.76589	7.4867	7.76257	7.60083	7.47263	7.42989	7.1397	7.33854	7.51313	7.4663	7.2975	7.28874	6.88272	7.40005	7.01751
221489_s_at	7.85734	7.724	7.75191	7.98159	7.48285	7.67221	7.33064	7.2959	7.14655	7.06341	7.10607	6.9625	7.11861	7.32261	7.21191	7.12571	7.27579	7.17109
221497_x_at	6.82662	6.99452	6.99032	7.01663	6.62874	7.01924	6.95007	6.70423	6.8443	6.39021	6.45696	6.33298	6.28983	6.33686	5.77319	5.85077	5.96589	5.74986
221543_s_at	6.86978	7.05755	6.98257	6.78834	6.28843	6.61333	6.49831	6.12977	6.3764	6.35234	5.87952	6.35368	6.31294	5.96984	6.22799	5.84093	5.64909	6.01776
221553_at	6.38198	6.41056	6.31754	6.16903	5.78622	6.07147	5.94244	5.87872	5.87468	5.51324	5.31052	5.87173	5.40284	5.47769	5.66353	5.61048	5.43839	5.61482
221556_at	7.61258	7.50068	7.46202	7.18784	6.94535	7.14367	7.02867	6.83324	6.89059	6.85398	6.87943	6.93786	7.00018	6.63556	6.85043	6.46685	6.90273	6.70653
221558_s_at	9.27752	9.41577	9.41623	9.60239	9.34315	9.50274	9.34747	9.34948	9.1102	8.83754	8.71023	8.65809	8.59097	8.37495	8.41243	8.23533	8.4464	8.29993
221570_s_at	8.20147	8.35767	8.24305	7.96774	7.94336	8.0748	7.92755	7.78048	7.84415	7.70711	7.79542	7.7343	7.5845	7.45862	7.59952	7.60053	7.7144	7.52209
221580_s_at	8.75599	8.65651	8.71882	8.68002	9.00481	8.58989	8.92183	8.47054	8.53801	8.55323	8.36564	8.61375	8.18527	7.97286	7.93402	7.96871	7.95402	7.79436
221613_s_at	8.16416	8.26124	8.03538	8.15406	7.79445	8.12813	7.94898	7.72173	7.76765	7.55322	7.37855	7.86574	7.67418	7.43831	7.60765	7.72081	7.74966	7.75634
221677_s_at	7.13501	7.10531	7.11237	7.08457	7.01776	7.22559	6.96116	6.62348	6.57601	6.76222	6.61934	6.92745	6.5104	6.43604	6.34983	6.471	6.66387	6.72449
221761_at	7.81742	7.89085	7.92646	7.84523	7.79409	7.74671	7.63591	7.47488	7.54029	7.27997	7.17221	7.52907	7.62325	7.23308	7.30614	6.9499	7.37074	7.08292
221770_at	6.71485	6.84478	6.72788	6.57164	6.54135	6.54831	6.63487	6.41709	6.46236	6.2368	6.24658	6.46654	6.21576	6.12782	6.13454	6.06807	6.20435	6.0077
221802_s_at	5.72554	6.1028	6.02051	5.99414	5.41769	5.27511	5.40445	5.51583	5.27859	4.9719	5.1321	5.0586	5.44408	4.89164	5.29879	5.10595	4.99292	4.90206
221808_at	6.31707	6.76087	6.73284	6.55865	6.48237	6.56383	6.41551	6.25661	6.26713	5.82691	5.99739	5.85913	5.61468	5.65134	5.65498	5.80273	6.21481	5.89536
221826_at	6.30459	6.3203	6.3925	6.13845	6.19291	6.12124	5.91956	5.83153	5.86969	5.80275	5.83431	5.68515	5.73544	5.29134	5.77084	5.52964	5.55172	5.53773
221923_s_at	9.95903	9.80943	9.9413	9.8692	9.90436	9.87258	9.79746	9.73656	9.80321	9.84788	9.64643	9.61646	9.29428	9.46311	9.29553	9.24442	9.37787	9.27982
221962_s_at	7.43931	7.41779	7.42681	7.54933	7.20238	7.48469	7.40414	7.21964	7.19445	7.16577	7.07761	7.22379	6.88346	7.08684	6.84059	6.85305	6.83321	6.65996
221987_s_at	6.65455	6.45809	6.55516	6.33456	6.32465	6.27833	6.31784	6.14102	6.09957	5.85005	6.04611	6.1947	5.77577	5.85396	5.69667	5.6404	5.90546	5.72023
222035_s_at	8.70295	8.84083	8.73945	8.51231	8.28746	8.73963	8.69142	8.36567	8.33721	8.40272	8.19547	8.55868	8.21576	7.9785	8.20847	8.13103	8.16434	8.12409
222036_s_at	7.65377	8.18269	8.19155	8.27585	8.08449	8.36472	8.25164	8.19775	8.09388	7.76733	7.78734	7.98513	7.63534	7.35395	7.63364	7.53793	7.18204	7.47161
222065_s_at	6.93305	7.04209	6.92681	6.85353	7.0579	6.99182	6.94339	6.76357	6.50579	6.02064	6.32123	6.59116	6.48341	6.12447	6.15716	6.47631	6.50219	6.61904
222140_s_at	6.50127	6.95151	6.93043	6.80014	6.82747	6.8014	6.67555	6.63225	6.46659	6.25802	6.54811	6.14267	6.20895	5.94831	6.16448	6.42752	6.41315	6.38314
222161_at	5.07373	5.28313	5.09638	5.3542	5.26532	4.90372	5.24543	5.21824	5.12792	4.84133	4.87073	4.75509	4.86846	4.50578	4.85621	4.53442	4.79416	4.38781
222162_s_at	7.40299	7.72244	7.5287	7.61059	7.22024	7.66056	7.31092	7.394	7.15293	6.95533	7.03361	7.02437	6.78868	6.38368	6.82149	6.49395	6.79794	6.75726
222164_at	7.35412	7.21985	7.10063	6.81902	6.9132	6.697	6.68301	6.55169	6.58248	6.37937	6.3519	6.34066	6.5698	6.10107	6.36633	6.13363	6.19987	6.25432
222209_s_at	7.62788	8.11693	7.9143	7.62832	7.53279	7.60204	7.63325	7.42162	7.54418	6.89126	7.41176	7.1494	7.23157	6.94973	6.58361	6.85154	7.14869	6.44505
222216_s_at	7.79385	8.03489	8.00363	7.94188	7.87585	8.00688	7.73642	7.42744	7.41234	7.38063	7.49901	7.50255	7.25597	7.34635	7.12938	7.47495	7.59999	7.27811
222258_s_at	8.06924	7.98118	7.99739	7.98963	7.81768	7.99189	7.6885	7.76226	7.53711	7.3714	7.65349	7.60369	7.4749	7.17551	7.24242	7.5713	7.53491	7.29833
36553_at	7.76973	8.07877	8.00783	8.07974	7.89822	8.17643	7.77242	7.76291	7.94443	7.72666	7.78342	7.58263	7.25805	7.32518	7.22063	7.26545	7.25565	7.21231
40284_at	5.95281	6.00486	6.0662	5.62452	5.57454	5.61653	5.74183	5.57931	5.53892	5.40144	5.28141	5.38862	5.45512	4.9516	5.28484	5.0589	4.99396	5.0006
41037_at	5.84922	5.66723	5.76981	5.69764	5.8703	5.79749	5.66785	5.60743	5.46288	5.53489	5.63999	5.3744	5.19811	5.27482	5.15892	5.31328	4.96049	5.00714
44783_s_at	9.37465	9.25432	9.31741	9.38587	9.19924	9.35185	9.10588	8.94498	8.96566	8.84235	8.76363	8.68917	8.72279	8.51621	8.5408	8.30141	8.63491	8.47228
52285_f_at	6.05261	6.02657	6.07035	5.58609	5.36246	5.90421	5.64791	5.65236	5.35843	5.16623	5.27086	5.40712	5.27765	5.00974	5.19833	5.22788	5.43065	5.15768
1255_g_at	5.21975	5.6805	5.27876	5.04025	4.69217	5.02467	4.66094	4.77261	4.64551	4.66082	4.4415	4.4913	4.49607	4.61108	4.59739	4.51295	4.43259	4.47489
200087_s_at	9.49991	9.45678	9.48244	9.24623	9.06058	9.21084	9.09095	8.80587	8.82966	8.84274	8.71359	8.9494	8.91055	8.80761	8.78297	8.99994	9.02019	8.9769
201029_s_at	9.84853	9.8227	9.89038	9.72983	9.66831	9.84661	9.58071	9.46535	9.52629	9.38125	9.0939	9.27249	9.26637	9.13792	9.11588	9.57775	9.49131	9.53201
201078_at	9.16288	8.99907	9.05649	8.87635	8.57988	9.02871	8.77689	8.72013	8.79745	8.4307	8.58625	8.59033	8.65089	8.19805	8.35779	8.67322	8.78237	8.77285
201099_at	7.16672	7.35723	7.19172	6.96221	6.57091	6.46291	6.6141	6.62765	6.60264	6.4535	6.56259	6.65755	6.87057	6.45597	6.68461	6.75345	6.91408	6.6371
201212_at	7.12296	7.1568	6.89171	6.90308	6.91179	6.8815	7.07631	6.7661	6.8498	6.59501	6.55264	6.54649	6.74192	6.40985	6.47125	6.74419	6.69032	6.53777
201238_s_at	9.05701	9.03814	8.85869	8.97229	8.62136	8.88731	8.91775	8.57738	8.48561	8.58918	8.45639	8.66039	8.5355	8.27253	8.42094	8.6504	8.72077	8.52939
201253_s_at	8.90399	9.04629	8.92775	8.66246	8.65343	8.79075	8.59477	8.33711	8.35137	8.30609	8.11047	8.34379	8.38943	8.20387	8.28404	8.61986	8.5425	8.42535
201288_at	6.72451	6.58803	6.63354	6.02664	6.09194	6.23027	5.98869	5.81501	5.87065	5.93047	6.23537	6.13016	6.1068	6.13487	6.18526	6.2683	6.28951	6.15475
201301_s_at	6.53042	6.69009	6.96596	6.33614	6.16905	6.60397	6.06432	5.76878	5.97947	5.98431	5.90685	6.11608	5.8437	5.68579	5.90398	6.08061	6.16966	6.17213
201302_at	5.24296	5.80171	5.60632	5.40648	4.97015	5.29767	4.93585	4.72998	4.95032	4.71578	4.65935	4.59786	4.70621	4.89162	4.88952	5.1407	5.17965	4.75337
201427_s_at	9.13244	9.42375	9.3422	8.06287	7.75293	8.03143	8.12126	7.59089	8.04058	7.43771	7.53145	7.9019	8.54449	8.80749	8.72938	9.02849	9.14192	9.17813
201438_at	9.46478	9.41203	9.2683	8.96027	8.7515	9.12017	8.93757	8.87311	9.06633	8.71234	8.49357	8.49548	8.67381	8.55492	8.37147	8.83338	8.81684	8.83561
201470_at	9.79372	9.7866	9.73554	9.15763	9.05052	9.14255	8.81629	8.57986	8.73803	8.81251	8.72713	9.021	8.8115	8.79723	8.70679	9.0595	9.12757	9.04593
201599_at	8.18558	8.4115	8.28242	7.64629	7.58306	7.72566	7.56379	7.21778	7.05813	7.12574	7.02136	7.38155	7.40972	7.21246	7.4212	7.56656	7.57003	7.43566
201656_at	6.04037	6.49566	6.40166	6.09191	5.67618	5.89238	5.73192	5.63179	5.60353	5.67389	5.62659	5.70922	5.73196	5.52995	5.57317	5.72633	5.80778	5.7485
201739_at	7.43441	7.52535	7.45696	6.89879	6.97886	7.54601	6.86059	6.5588	6.61729	6.67793	7.11441	6.95494	7.30741	7.12432	7.18219	7.42435	7.53037	7.51127
201744_s_at	8.82533	8.74117	8.62711	7.96355	7.95674	8.08435	8.23256	7.66018	7.72801	7.47418	7.9437	8.19637	8.19158	7.67398	8.08694	8.39165	8.34878	8.01774
201831_s_at	8.14033	8.28164	8.08401	7.80574	7.5424	7.16714	7.71208	7.3382	7.3693	7.30244	7.07451	7.6365	7.30894	7.2718	7.40375	7.57185	7.49632	7.38113
201925_s_at	4.31568	4.50815	4.63699	4.2849	3.84927	3.86383	3.83099	3.69632	4.00494	3.74416	3.5486	3.63124	3.598	3.68883	3.62808	3.66983	3.77073	3.49395
202026_at	7.76737	7.52688	7.59499	7.07221	6.88932	7.14148	7.09702	6.99439	7.03972	7.01173	6.83466	7.1623	6.89231	6.74484	6.99682	6.85267	6.82272	6.96197
202286_s_at	6.78441	6.91507	6.97087	6.36416	6.05531	6.5996	6.23796	5.86718	6.25397	6.35326	6.07671	6.28264	6.24667	5.93283	6.02623	5.9785	6.15273	5.84256
202346_at	7.382	7.5796	7.28439	7.03283	6.93693	7.07975	7.17865	6.74959	6.84736	6.72646	6.92432	6.97543	6.72536	6.78415	6.88431	6.90476	7.02598	6.66853
202347_s_at	8.0951	8.01614	7.9653	7.64351	7.58362	7.49259	7.48265	7.29018	7.39475	7.17851	7.36228	7.39661	7.40225	7.18563	7.23958	7.3363	7.30773	7.31402
202375_at	4.86814	5.63141	5.48878	4.71085	4.57491	4.69491	4.70396	4.60243	4.64356	4.18929	4.67026	4.53687	4.65396	4.46492	4.65734	4.67191	4.79515	4.60352
202377_at	8.11199	8.34276	8.39162	8.19849	7.97435	8.11991	7.91977	7.8698	7.84205	7.90036	7.58465	7.67676	7.65864	7.63059	7.76206	7.94768	7.92058	8.11996
202651_at	5.26643	5.51399	5.68283	5.15545	4.74063	4.86081	5.20149	4.93743	4.95909	4.90466	5.06275	5.10256	5.71539	5.35357	5.50131	5.72086	5.87432	5.74849
202722_s_at	7.92339	7.83284	8.01151	7.46736	7.26848	7.39992	7.33917	7.34354	7.26523	7.22524	6.85718	7.28195	7.05113	6.99313	6.97151	7.24262	7.27053	7.2076
202797_at	8.50874	8.55787	8.52349	8.29712	7.79257	7.89517	8.04336	7.89717	7.64487	7.81032	7.82762	7.75241	7.80661	7.45711	7.67141	7.58457	7.89299	7.72525
202829_s_at	6.02752	6.38614	5.9882	5.93405	5.62846	5.80275	5.85806	5.4809	5.46112	5.64374	5.34616	5.70281	5.52469	5.32806	5.56967	5.64842	5.7419	5.66634
202874_s_at	6.80314	6.83586	6.47331	6.43973	6.23426	6.1959	6.25559	6.15895	6.19146	6.10644	6.10858	6.0684	6.09616	6.09954	5.81075	6.07074	6.15044	5.83432
203042_at	5.10309	5.52262	5.15438	4.71167	4.40302	4.70826	4.65947	4.50974	4.54658	4.59095	4.24862	4.57195	4.59781	4.40201	4.60607	4.52698	4.4837	4.56902
203075_at	7.30431	7.46668	7.3867	7.10421	6.77777	7.04011	6.91216	6.90775	6.91161	6.59525	6.79203	6.56561	6.74269	6.33703	6.556	6.94327	7.23937	6.71137
203095_at	7.25343	7.24965	7.13904	7.1522	6.68199	6.67869	6.8153	6.72332	6.79569	6.86883	6.47961	6.65043	6.41144	6.41749	6.55394	6.58644	6.36283	6.56941
203100_s_at	6.93289	6.98725	6.86048	6.6081	6.40571	6.23699	6.37981	6.24892	6.23847	6.26474	6.14982	6.13436	6.36763	6.00045	6.08938	6.15329	6.0696	6.04615
203140_at	6.25955	6.27863	6.31561	5.94438	5.65938	5.56434	5.86713	5.68238	5.71065	5.63603	5.54138	5.52121	5.63732	5.5147	5.49944	5.3774	5.53129	5.31406
203298_s_at	9.26478	9.12508	9.06902	8.6834	8.48266	8.4905	8.15307	8.15171	8.3381	7.96689	8.33068	7.97275	8.19719	8.1908	8.35258	8.52724	8.59204	8.57061
203400_s_at	9.69677	9.71981	9.82359	7.47285	7.66726	7.97856	8.7108	7.64254	8.01221	7.22945	7.68358	7.99545	9.07769	9.25879	9.70447	10.902	10.8759	10.8856
203448_s_at	6.43078	6.62665	6.41	6.18582	5.92878	5.61466	5.93956	5.82644	5.73055	5.37005	5.77069	5.87634	5.87221	5.49811	5.59519	5.36072	5.78275	5.67564
203505_at	6.73206	7.07065	6.68951	6.80101	6.3432	6.3544	6.43454	6.24363	6.36144	6.21297	6.08366	5.96005	6.28325	6.16554	6.21611	6.21766	6.19008	6.09405
203567_s_at	5.99101	6.11176	6.12625	5.63908	5.54356	5.53059	5.52406	5.23031	5.56773	5.49651	5.4822	5.44865	5.81508	5.5411	5.51457	5.5943	5.71395	5.65028
203594_at	7.35159	7.70452	7.80875	7.50713	7.07356	7.39823	7.20398	6.90615	6.99262	7.00849	6.75115	7.1782	6.90171	6.96971	6.92204	6.78494	7.08068	7.09461
203632_s_at	8.4047	8.31216	8.43509	7.53188	7.47511	7.68918	7.17855	7.16231	7.02775	7.06779	7.23407	7.27677	7.15417	7.38414	7.3204	7.45379	7.5232	7.45387
203641_s_at	6.08815	6.46134	6.1789	6.00683	5.95492	5.49676	5.80861	5.53579	5.61114	5.61466	5.61973	5.51524	5.69162	5.87269	5.69246	5.58127	5.59832	5.77137
203642_s_at	4.80237	5.25458	5.21396	4.54586	4.68378	4.28008	4.43012	4.20423	4.2689	4.24591	4.30072	4.2799	4.55374	4.39363	4.36806	4.28864	4.46224	4.39241
203697_at	8.79695	8.89023	8.73175	8.03296	8.15173	8.57017	8.41884	8.10116	8.12784	8.27511	8.46007	8.59979	8.76977	8.63605	8.71609	8.86299	8.8709	8.84569
203698_s_at	9.05921	8.96896	9.0366	7.85982	8.03633	8.59089	8.3168	7.94316	8.12306	8.17717	8.47378	8.42581	8.72301	8.48689	8.57588	8.63806	8.94803	8.70813
203716_s_at	5.82898	5.83743	5.71942	5.13754	4.93816	4.91143	4.93748	4.93751	4.76539	5.08062	4.86896	4.93913	4.81766	5.04086	4.88669	4.705	4.65994	5.05037
203797_at	6.81033	6.62849	6.9475	6.56018	6.67388	6.39191	6.33039	6.30595	6.39017	5.95246	6.01045	5.93132	6.18091	6.26313	6.06504	6.31161	6.55637	6.46699
203803_at	5.22547	5.69304	5.35573	5.06017	4.68954	4.74269	4.93146	4.78364	4.81266	4.56927	4.43152	4.51004	4.51179	4.46307	4.53863	4.44498	4.52175	4.39949
203852_s_at	6.99016	6.79274	6.82514	6.55278	6.19097	6.57379	6.20397	6.23533	6.28712	6.2058	6.12138	6.24446	6.084	5.95901	6.08473	6.04274	6.17916	6.04547
203857_s_at	7.35758	7.13859	7.25815	6.84936	6.86318	6.86033	6.7669	6.6832	6.63489	6.36447	6.36946	6.46493	6.64268	6.43773	6.41162	6.82777	6.76637	6.73496
203869_at	6.32736	6.33729	6.23504	6.04618	5.91244	5.97019	5.8909	5.76888	5.8983	5.7618	5.64904	5.93103	5.63897	5.58184	5.80069	5.70696	5.96922	5.50395
203999_at	6.30895	6.33457	6.50158	6.28598	6.18939	5.88597	6.01349	6.00167	6.06031	5.85754	6.13865	5.96569	6.35892	6.30013	6.42355	6.68786	7.11301	6.66562
204017_at	6.07589	6.05294	6.10199	5.39996	5.30055	5.46806	5.42803	5.34383	5.5077	5.5741	5.2784	5.26239	5.48836	5.51566	5.4695	5.5679	5.48032	5.52204
204044_at	8.47487	8.32836	8.2228	8.03993	7.84286	8.08463	7.82179	7.76496	7.71637	7.66958	7.63392	7.70876	7.4695	7.4897	7.53184	7.62351	7.7543	7.62157
204047_s_at	6.71147	6.62992	6.74133	6.29844	6.08739	5.77648	6.19434	6.16478	6.29737	5.85387	5.78149	6.22575	6.08647	6.10981	6.05554	6.03175	5.78744	5.78737
204048_s_at	8.39833	8.23728	8.27555	7.91535	7.69967	7.26844	7.80159	7.51965	7.46981	7.21101	7.07391	7.61349	7.54683	7.26889	7.31977	7.33318	7.33566	7.25855
204141_at	9.91748	9.85947	9.99502	8.64224	8.33778	8.8291	8.40549	8.18175	7.95911	8.17095	8.08968	8.50601	8.65021	8.49151	8.78298	9.39476	9.36096	9.42575
204271_s_at	7.96766	8.10834	7.98206	7.08136	6.64916	7.18942	6.75785	6.71421	7.28601	7.29282	7.3481	7.71616	7.48298	7.70572	7.56935	7.52792	7.61371	7.44904
204285_s_at	6.78076	6.75875	6.70534	4.51459	4.70035	4.65787	4.3342	4.19431	4.56689	4.6246	4.67015	5.0933	5.56924	5.37054	5.45986	5.73656	5.39165	5.46517
204286_s_at	4.1094	5.05305	4.79106	3.4643	3.4103	3.5694	3.44075	3.31036	3.31193	3.40608	3.62195	3.51246	3.84931	3.52829	3.72549	3.89712	3.88371	3.97782
204326_x_at	8.40685	8.66707	8.58658	8.23765	7.82246	7.86007	7.65614	7.1035	7.58043	7.00466	6.99406	7.79673	7.78719	8.52491	7.64623	8.57561	8.15514	8.19849
204351_at	5.68182	5.79208	5.64188	4.81859	4.90878	5.22222	4.86184	4.65649	5.19128	4.90518	4.78674	4.7882	4.75904	5.13949	4.88005	4.89009	4.78299	4.88076
204368_at	6.48489	6.33224	6.49597	5.96797	5.68081	5.81308	5.76877	5.72786	5.76263	5.73656	5.59975	5.67352	5.66575	5.73297	5.78446	5.64165	5.5512	5.67999
204400_at	7.99988	7.6805	7.83008	7.58111	7.39843	7.70267	7.30621	7.28551	6.7845	7.23461	7.48083	7.52616	8.01615	7.5071	7.81909	7.88107	8.00088	7.99971
204416_x_at	8.3444	8.53117	8.5911	7.89619	7.93939	7.94544	7.86609	7.42629	7.7029	7.3811	7.21405	7.22338	7.41656	7.63209	7.57363	8.41666	8.14762	8.29565
204438_at	5.75629	5.96316	5.8137	5.22696	5.19114	5.06703	5.2849	4.88358	5.04114	4.68002	5.1188	5.18984	5.21531	5.07432	4.99003	5.18363	5.30838	5.09716
204450_x_at	10.5607	10.4683	10.3479	8.50717	8.66815	8.46502	8.69105	7.73293	8.0285	6.88226	7.47109	6.92525	8.84221	8.69197	8.95814	10.4917	10.6605	10.3811
204469_at	8.31812	8.45613	8.61104	7.9663	7.68962	7.8136	7.70497	7.68715	7.77114	7.58022	7.81986	7.77692	7.76765	7.76872	7.67349	7.8572	7.95061	7.65857
204490_s_at	5.14958	5.07088	5.14263	4.5787	4.46431	4.40926	4.4508	4.31295	4.43361	4.3888	4.42361	4.31712	4.266	4.16195	4.24897	4.30997	4.38498	4.32068
204534_at	7.9751	8.24829	8.09457	6.89143	6.98615	6.88832	7.50795	7.01339	7.03805	6.52368	6.40905	6.31962	6.26186	6.50838	6.86167	7.99871	7.89159	7.73176
204579_at	6.35827	6.35982	6.3826	6.14415	6.03579	5.91698	5.81851	5.89034	5.72425	5.50862	5.78192	5.60396	5.51074	5.72812	5.65	5.68182	5.5788	5.75769
204588_s_at	7.78743	7.62738	7.65482	6.79716	7.26447	6.88201	6.85245	6.65953	6.90357	6.72467	6.6238	6.69479	6.54887	6.65149	6.57336	6.53446	6.59708	6.7608
204607_at	7.04336	7.11227	7.13344	6.08034	6.37074	6.20287	6.51674	6.49716	6.35798	6.25397	6.17685	5.8776	6.45172	6.35776	6.46528	6.8956	7.04193	6.99327
204678_s_at	5.44888	5.65881	5.68438	4.95848	4.90958	4.91224	4.85807	4.65955	4.88127	4.82964	4.75391	4.85485	4.79092	5.12308	4.89836	4.94411	4.65317	4.71055
204679_at	6.34774	6.39204	6.59308	5.75655	5.83293	5.84596	5.80767	5.73743	5.59013	5.87424	5.84715	5.7818	5.87383	5.97957	5.92975	5.83236	6.00456	5.81797
204694_at	12.1813	12.1569	12.117	9.61222	9.97736	10.5581	10.7267	9.76543	10.1222	9.99649	10.8048	11.0207	12.3412	12.4882	12.5504	13.0268	13.1078	12.9871
204702_s_at	4.4352	4.69181	4.35279	4.02002	3.89607	4.16451	3.86129	3.81297	3.81577	3.86576	3.77939	3.81893	3.74796	3.82624	3.7854	3.86311	3.68029	3.69794
204745_x_at	9.94117	9.81841	9.89262	9.19332	8.95867	8.88007	8.70399	8.26305	8.76565	8.64235	8.5031	9.18709	9.82488	10.5301	9.20983	10.2351	10.1943	10.0981
204818_at	4.85879	4.66382	4.56145	4.12524	3.95984	4.06701	4.3673	4.2907	4.30749	4.31621	4.30354	4.32562	4.9023	4.59085	4.50841	4.97877	5.18821	4.9785
204836_at	8.15366	8.40374	8.38432	7.73772	7.62996	7.66035	7.80196	7.66005	7.80157	7.60051	7.38584	7.63025	7.67764	7.49534	7.49798	7.58143	7.53784	7.43375
204976_s_at	6.76248	6.81244	6.77089	6.12463	5.92521	6.04514	6.11386	5.80942	5.68548	6.00309	5.76862	6.14019	6.01339	5.82611	5.95471	6.12026	6.09875	5.90524
204988_at	9.15631	9.10471	9.17745	7.52726	7.54684	7.22738	7.78216	6.92274	7.08488	6.59826	6.44487	6.83232	7.9458	8.10049	8.03282	9.02535	9.21966	9.16081
205011_at	6.98055	7.02915	7.01417	6.63004	6.69916	6.52511	6.37318	6.29468	6.35082	6.68718	6.20623	6.39572	6.07632	6.52574	6.3025	6.20384	6.16054	6.42051
205100_at	6.6803	6.756	6.6638	6.04865	6.24243	5.95999	5.87316	5.82297	6.12694	5.82737	6.04041	6.08179	6.12323	6.01482	5.85549	6.05978	6.09383	6.24076
205229_s_at	5.83151	5.99138	5.90032	5.41855	5.09388	5.30256	5.24368	5.16008	4.97886	4.99383	5.29036	5.01773	4.95709	4.9742	5.00621	4.93791	5.00991	4.88501
205263_at	6.30052	6.35041	6.44547	6.20942	5.81333	6.10694	5.9282	5.76331	6.00869	5.89284	5.33988	5.80811	5.37138	5.56791	5.83619	5.95513	5.87461	5.61315
205357_s_at	6.66664	6.63073	6.65964	4.76082	4.80414	4.98	5.11761	4.88246	4.92317	5.20311	4.71667	5.22668	5.22287	5.40829	5.72737	5.68009	5.61027	5.63525
205380_at	4.35704	4.52326	4.34676	3.72397	3.83934	3.60101	3.50336	3.61583	3.70262	3.64421	3.72683	3.76849	3.8661	3.93579	3.92861	3.8808	4.17352	4.22918
205399_at	6.36915	6.60539	6.55029	4.63766	4.55575	4.60694	4.61179	4.53578	4.71125	4.5727	4.9592	4.71792	5.39594	5.29869	5.53359	6.1201	6.41519	5.98363
205415_s_at	4.66987	5.10279	4.90392	4.82039	4.43444	4.47462	4.55514	4.36343	4.73406	4.22131	4.38191	4.46255	4.40063	4.30404	4.28137	4.47208	4.32358	4.23102
205440_s_at	4.96652	4.75139	5.40317	4.39322	4.51819	4.22845	4.29255	4.19489	4.39568	4.20126	4.29413	4.19419	4.14925	3.97042	4.03623	4.25648	4.14147	4.16737
205542_at	5.7059	5.85204	5.71371	5.19358	4.93389	4.92604	4.90635	4.9206	4.54831	4.55024	4.63603	4.70065	4.86974	4.99163	5.00218	4.92393	5.14993	5.05218
205630_at	4.96071	4.9949	4.8721	4.55566	4.51484	4.39488	4.25524	4.11918	4.21706	4.29386	4.10257	4.06687	4.18107	4.37097	4.43071	4.32227	4.28803	4.29894
205649_s_at	4.30832	4.72512	4.58676	3.42852	3.482	3.46988	3.4427	3.31301	3.45383	3.54224	3.26783	3.45362	3.58653	3.70378	3.67175	4.26217	4.02654	4.16892
205650_s_at	8.25642	8.25917	8.26538	6.08013	6.71842	6.34714	6.75547	6.42009	6.46783	6.59424	6.49969	6.49888	7.50824	7.63123	7.50594	8.54679	8.18755	8.36785
205675_at	4.83713	4.94292	4.96323	4.23038	4.19224	4.17263	4.22454	4.10783	4.12003	3.93847	4.07364	4.04529	4.11556	4.35839	4.45756	4.3501	4.47181	4.36303
205789_at	4.50372	4.3835	4.2767	3.82292	3.888	3.72375	3.52073	3.59134	3.61902	3.57189	3.61985	3.67782	3.60833	3.65541	3.67227	3.48519	3.46699	3.54955
205820_s_at	7.84948	7.46637	7.62121	4.82555	5.18693	4.83072	5.61506	4.9007	5.54259	4.95076	4.97303	5.03165	5.30879	5.29208	5.67659	6.85611	6.92587	6.87549
205876_at	4.99192	5.30448	4.77175	4.57097	4.40291	4.28803	4.43969	4.28973	4.39393	4.22419	4.2187	4.24754	4.06866	4.335	4.24248	4.24259	4.22617	4.06629
205977_s_at	7.32431	7.26319	7.03333	6.886	6.73935	6.6309	6.54708	6.69827	6.84147	6.64794	6.3686	6.63982	6.62815	6.68112	6.45418	6.53289	6.46268	6.59537
205980_s_at	5.87771	5.96549	6.05907	5.65586	5.58599	5.62106	5.60871	5.44558	5.606	5.36864	5.22151	5.35541	5.22429	5.4064	5.16079	5.31038	5.1089	5.07949
205981_s_at	7.05023	6.95546	6.97666	6.57983	6.29744	6.38364	6.36554	6.37778	6.32106	6.23535	6.19414	6.49298	6.19777	5.98917	6.293	6.26774	6.52654	6.51786
206065_s_at	4.64183	4.49342	4.80785	4.0029	4.09345	4.00523	4.12285	4.10146	4.0586	3.97777	4.00189	3.84049	4.17937	4.16098	4.02266	4.21952	4.15132	4.19633
206204_at	4.32855	4.55765	4.18583	3.93938	3.95469	3.90527	4.0959	3.87057	3.90175	3.91263	3.79105	3.79024	3.86553	3.75316	3.78215	3.6852	3.76771	3.50515
206302_s_at	7.55894	7.56458	7.53802	7.42347	6.92782	7.29899	7.13006	6.55309	6.6569	6.95943	6.53783	7.11159	6.75676	6.81322	6.9653	6.92555	7.01385	7.03874
206349_at	5.75952	5.86042	5.41672	5.49293	5.26173	5.24391	5.05546	5.35316	5.60325	5.23294	5.22224	5.03055	5.10664	4.97623	4.92287	4.9226	4.88462	4.9352
206430_at	7.28394	7.14625	7.06545	6.78455	6.58096	6.67897	6.53919	6.73367	6.5965	6.75902	6.35672	6.44267	6.0996	6.49769	6.51374	6.25933	6.08909	6.32398
206461_x_at	10.6109	10.4612	10.5071	9.89378	9.40067	9.56771	9.34721	8.73162	9.14108	8.97841	8.73182	9.65079	10.101	10.8623	9.62027	10.4761	10.506	10.4571
206653_at	4.56716	4.91157	4.64001	4.2432	4.21323	4.15223	4.11854	4.06393	4.15814	4.19905	4.0487	4.07171	4.27031	3.99734	4.01357	3.92978	4.09385	3.95426
206701_x_at	6.66279	6.88582	6.84235	5.95405	5.78373	6.24943	6.04021	6.03342	6.27648	6.17227	6.30047	6.57865	6.44986	6.46898	6.4933	6.52601	6.87157	6.43055
206783_at	6.83038	6.66898	6.56184	6.49798	6.30981	6.41823	6.1052	6.11592	6.03484	5.99271	6.05772	6.01453	6.06308	6.09193	6.3609	6.00363	5.99143	6.00066
207076_s_at	8.39447	8.37711	8.4249	6.59032	6.24084	6.56329	6.14745	6.40593	6.24317	6.35051	6.62298	6.53547	7.02729	7.10078	7.12805	8.23821	8.04236	7.96465
207102_at	4.44063	4.72274	4.73851	4.04747	3.92096	4.02263	4.17447	3.79164	3.96508	3.80148	3.77939	3.72257	3.749	3.78054	3.93097	4.11778	4.04575	4.24456
207695_s_at	5.80297	5.80041	5.75983	5.15212	5.10025	5.32656	4.99124	4.90884	4.78641	4.93769	5.28534	4.99192	5.22482	5.12809	5.36228	5.49107	5.76657	5.57435
207791_s_at	7.74485	7.95689	7.79682	7.6485	7.3558	7.58157	7.33611	7.22342	6.97798	7.11455	7.36362	7.08627	7.34648	6.89211	7.21232	7.55853	7.49131	7.20196
208016_s_at	5.10464	5.31274	4.94047	4.20445	4.28762	4.23075	4.41391	4.39498	4.42381	4.44963	4.4151	4.43953	4.44929	4.66519	4.70032	4.65499	4.80269	4.55288
208581_x_at	10.0365	9.98759	10.027	9.54019	9.1942	9.26368	8.94497	8.38427	8.81919	8.42587	8.50986	9.20579	9.6323	10.1904	9.06832	9.76295	9.76547	9.75213
208743_s_at	8.82887	8.81915	8.7341	8.50757	8.39475	8.64314	8.35046	8.34657	8.17723	7.8813	8.23789	8.34061	8.11638	7.8591	8.43356	8.40326	8.36166	8.19163
208761_s_at	9.4365	9.35477	9.3379	9.18575	9.03042	9.18259	9.06761	8.86409	8.81878	8.78557	8.90384	8.94531	8.903	8.57512	8.73523	9.00169	8.92077	9.00897
208791_at	8.73346	8.72776	8.72883	8.29407	8.05614	8.29894	7.63732	7.69401	7.61905	7.55397	7.44526	7.29434	7.841	7.51391	7.80357	8.39295	8.30406	8.30781
208792_s_at	7.52612	7.93771	7.58586	7.39807	7.16017	7.22884	6.86523	6.60252	6.74709	6.61587	6.55935	6.2094	6.54054	6.42943	6.78875	7.33609	7.55152	7.31267
208869_s_at	5.67975	5.4626	5.32259	5.28719	5.28674	5.395	5.13796	4.94113	5.15046	4.90129	4.84207	4.99442	4.78543	4.96373	4.73934	5.37433	5.20295	5.17448
208898_at	8.49329	8.33459	8.48071	8.06647	8.01522	8.12547	7.86213	7.80061	7.72979	7.81141	7.60476	7.66796	7.54256	7.59254	7.6731	7.71982	7.80885	7.75894
208924_at	8.11217	8.12804	8.14097	7.68726	7.31038	7.61604	7.52336	7.36274	7.45513	7.32428	7.28439	7.43244	7.44055	7.37078	7.537	7.55851	7.59909	7.40243
208940_at	8.0049	8.1127	8.10187	7.53232	7.51209	7.67221	7.60399	7.43193	7.4091	7.35513	7.76866	7.79455	7.889	7.57684	7.9134	8.03948	7.95791	7.89429
208959_s_at	7.68456	7.9378	7.79986	7.58097	7.42297	7.58309	7.40035	7.07875	7.13315	7.09302	6.7457	7.34506	7.23547	7.2979	7.11605	7.21897	7.13885	7.04782
209141_at	8.75071	8.74777	8.83791	8.392	8.25854	8.50867	8.27983	8.1806	8.03524	8.1219	7.90991	8.29193	8.11097	7.95692	8.17356	8.06467	8.0244	8.1849
209142_s_at	8.03508	8.11616	8.25353	7.81959	7.71311	7.97372	7.62381	7.59974	7.22302	7.18743	7.56882	7.57231	7.8187	7.14678	7.3923	7.82805	7.83499	7.4661
209147_s_at	6.93681	6.81822	6.83282	6.22849	6.1325	6.36192	6.24836	6.07132	6.1725	6.19165	6.10005	6.00013	6.25882	6.18263	6.28352	6.46523	6.54871	6.37838
209278_s_at	5.76194	5.90617	5.47546	4.92558	4.63049	5.0165	4.86679	4.93376	5.09307	5.19877	5.0482	5.10156	4.77261	4.79253	4.89088	4.55146	4.74435	4.66852
209301_at	7.62239	7.6715	7.67216	6.58598	6.5985	6.48489	6.42574	6.01626	6.34127	6.08409	5.19006	6.96339	6.52472	6.58043	6.49508	6.5388	6.62971	6.61909
209529_at	5.38461	5.47258	5.14839	4.64746	4.78457	4.6139	4.3043	4.42771	4.25068	4.45004	4.41813	4.30325	4.28943	4.30274	4.43803	4.42421	4.42835	4.27706
209631_s_at	4.50978	5.37453	5.14658	4.38881	4.58215	4.69613	4.34939	4.21697	4.11741	4.08434	4.02187	4.22686	4.31747	4.20356	4.16844	4.2427	4.26579	4.25437
209660_at	10.3351	10.2792	10.3569	8.70075	9.07903	8.46125	9.19486	8.132	8.48535	7.15437	7.01701	7.18688	8.57552	8.63104	8.68643	9.91763	10.0232	9.83493
209678_s_at	7.99829	8.12403	8.21873	7.7281	7.41856	7.75874	7.60566	7.27291	7.56227	7.65838	7.3987	7.52952	7.43613	7.66424	7.62493	7.46199	7.52606	7.29573
209726_at	6.04751	6.03713	6.04994	5.38894	5.2948	5.45748	5.00772	5.19476	5.10858	5.01093	5.22203	5.08354	4.98606	5.13246	4.93749	4.94998	5.05809	5.08858
209790_s_at	7.23945	7.2793	7.11026	7.33379	6.87331	7.20619	6.91605	6.95466	6.8089	6.53742	6.80187	6.64799	6.68145	6.47364	6.75746	6.91968	7.15713	6.82903
209835_x_at	4.67399	4.89953	4.86196	4.35956	4.51802	4.43582	4.30031	4.28466	4.35318	4.29293	4.15595	4.07786	4.04465	4.33644	4.193	4.1493	4.18112	4.07256
209894_at	4.82273	5.08139	5.05913	4.54249	4.36168	4.13742	4.0838	4.29653	4.24876	4.17602	4.15502	4.21748	4.06352	3.98814	4.12045	3.92956	4.17379	3.98334
210085_s_at	5.42439	5.43279	5.14547	4.97601	5.02476	4.96653	4.81173	4.76659	5.00052	5.17079	4.69732	4.69324	4.77916	4.77235	4.64264	4.81642	4.57711	4.60359
210095_s_at	9.65062	9.62311	9.50302	8.92615	8.70484	9.1838	9.08687	8.71284	8.84499	8.80697	8.63568	8.6603	8.5539	8.59879	8.52998	8.92532	9.04669	8.93043
210130_s_at	7.66104	7.66292	7.84261	7.49392	7.62451	7.47388	7.32993	7.21857	7.03987	7.13421	6.99762	7.04385	6.95146	7.26748	6.98756	7.55334	7.48559	7.31639
210293_s_at	5.94037	5.99182	5.99619	5.44069	5.23851	5.53392	5.44637	5.38539	5.21666	5.40379	5.26176	5.31406	5.49317	5.19569	5.28537	5.26553	5.32085	5.16845
210519_s_at	5.92578	6.04501	6.12286	5.39935	5.33715	5.76167	5.65263	5.5298	5.41957	5.56993	5.6007	5.29383	5.68258	5.80275	6.03881	5.90732	6.12445	5.83523
210665_at	4.88036	4.90063	4.89747	4.16361	4.24227	4.26549	4.24374	4.09108	4.00011	4.07745	3.92647	4.02799	4.07662	3.943	3.98565	3.7714	3.8952	3.91822
210762_s_at	8.87476	9.07042	9.00435	8.7138	8.56948	8.79011	8.65994	8.34932	8.43124	8.13541	8.21124	8.13288	8.38407	8.37965	8.36504	8.43172	8.47225	8.4517
210968_s_at	9.97587	9.745	9.84963	9.35278	9.23362	9.42831	9.40464	9.27745	9.05621	9.15876	9.43335	9.54204	9.62584	9.43277	9.54174	9.69115	9.86966	9.78793
211016_x_at	7.98106	8.28853	7.91394	7.71862	7.69286	7.6158	7.56667	7.47373	7.44075	7.37697	7.18959	7.48585	7.09268	7.30664	7.22036	7.25713	7.40123	7.28019
211343_s_at	7.32894	7.04461	7.1228	6.75604	6.6302	6.55958	6.36974	6.26588	6.40482	6.1896	6.29222	6.22008	6.43521	6.49655	6.39134	6.46916	6.57825	6.51793
211456_x_at	10.3593	10.4563	10.2708	9.90944	9.74938	9.6519	9.38366	9.05677	9.26173	9.2591	9.29941	9.79072	10.1888	10.6133	9.66707	10.4042	10.3255	10.4029
211458_s_at	6.70317	6.67152	6.92244	6.43583	6.34518	6.54568	6.47271	5.92665	6.29554	6.26149	6.01945	6.1726	6.15261	6.13358	6.06848	6.34955	6.68823	6.23513
211548_s_at	4.64361	5.0833	5.0862	4.37845	4.22807	4.24017	4.28652	4.39488	4.35937	4.30196	4.29831	4.41665	4.23386	4.14514	4.28464	4.38746	4.31919	4.37066
211549_s_at	4.18078	4.58493	4.50699	4.02445	3.96788	3.90491	3.99412	3.72397	3.78352	3.88884	3.8453	3.94242	3.82631	3.82098	3.94417	3.86828	3.75985	3.80354
211828_s_at	6.58163	6.41056	6.65244	5.90606	5.90825	5.85436	5.66952	5.76888	5.74036	5.56443	5.8522	5.85001	5.59524	5.98038	5.43277	5.78187	5.95543	5.89212
212110_at	8.24577	8.26357	8.31862	7.7351	7.56415	7.58906	7.4732	7.4156	7.044	7.03302	7.12443	7.07833	7.35263	7.35265	7.33606	7.55273	7.63595	7.4429
212185_x_at	10.5313	10.5931	10.5478	10.2179	9.94196	9.90659	9.71463	9.24498	9.78138	9.48055	9.45754	10.072	10.5122	10.9849	9.88854	10.6784	10.8203	10.8322
212190_at	9.27542	9.37153	9.22231	7.83582	7.71967	7.86795	7.48314	7.43004	7.51916	7.28547	7.46634	7.7824	7.9417	7.6776	7.93668	7.95401	8.26691	7.99142
212246_at	5.49678	5.5049	5.37566	5.23918	5.08472	5.561	5.1665	5.05151	4.99869	4.90998	4.81888	5.0714	4.95881	4.76089	4.91307	5.06891	5.14389	4.94455
212314_at	6.0116	6.12889	6.41213	5.79624	5.67719	5.68366	5.61663	5.6669	5.56427	5.38465	5.32998	5.43594	5.32547	5.52879	5.32003	5.42365	5.17203	5.09291
212333_at	7.87463	7.89805	7.92339	7.48995	7.37257	7.35669	7.23253	7.15817	6.97406	6.96537	7.06369	7.06593	7.34935	7.10588	7.08562	7.35735	7.42031	7.1746
212446_s_at	6.46286	6.6924	6.63406	6.54023	6.21215	6.278	6.28392	6.20095	6.24595	5.89151	5.98833	6.07772	6.13211	5.63288	6.30718	6.3776	6.22691	6.29013
212637_s_at	4.04898	4.19098	4.22331	3.74665	3.62045	3.42315	3.57865	3.592	3.44288	3.33777	3.45251	3.36392	3.63558	3.38903	3.41812	3.3723	3.48065	3.21398
212638_s_at	7.51789	7.56879	7.42316	6.95294	6.47982	6.38697	6.80454	6.93294	6.78875	6.52869	6.50855	6.49084	6.80361	6.16496	6.64815	6.39811	6.41965	6.25853
212660_at	6.03634	6.12661	6.02925	5.39821	5.5568	5.40205	5.22365	5.4524	5.58154	5.55834	5.37314	5.32216	5.38582	5.60714	5.48921	5.48424	5.10325	5.33038
212749_s_at	7.56263	7.60992	7.46123	6.88403	6.94443	7.15693	7.19473	6.7123	7.08874	7.07905	6.79234	7.08902	7.13263	6.65037	6.92946	6.69183	6.76052	6.76447
212761_at	9.98401	9.84568	9.93245	9.46501	9.33136	9.43791	9.26469	9.2962	9.37272	9.31788	9.42529	9.30561	9.5976	9.20041	9.41306	9.44903	9.60767	9.42232
212824_at	7.06193	7.06503	7.04231	6.61765	6.37165	6.55656	6.55724	6.47747	6.38044	6.30535	6.33964	6.3752	6.81369	6.11605	6.52732	6.18261	6.42041	6.35938
212859_x_at	9.86371	10.0107	9.94934	9.46822	8.99422	9.20777	8.88934	8.22349	8.71525	8.2738	8.33136	9.08303	9.45404	10.0882	9.08944	9.84555	9.65513	9.65699
213075_at	6.46684	6.17904	6.39885	5.99149	5.82999	5.65836	5.50666	5.59891	5.71757	5.6483	5.6529	5.40106	5.59842	5.69514	5.71465	5.67319	5.16564	5.46394
213107_at	6.97387	6.65951	6.76233	6.46929	6.20394	6.27154	6.02277	6.16475	6.35982	6.16027	5.99968	6.19945	5.95253	6.18022	6.0805	6.22339	6.10574	6.07824
213131_at	5.42624	5.40969	5.29488	5.16652	5.01843	5.00456	4.81287	5.0733	4.98503	5.0354	5.093	4.9261	5.22759	5.49295	5.59721	5.87947	5.70371	5.82823
213225_at	6.74714	6.52498	6.50901	6.19465	5.90772	6.07967	5.89923	5.86099	5.86212	5.83361	5.83113	5.93131	6.08344	5.86779	5.97257	5.98298	5.89413	6.12626
213265_at	6.91764	7.07563	6.84449	5.93541	5.81918	6.30879	6.0985	6.20782	6.06163	6.19728	6.26865	6.11014	6.35063	6.17357	6.27492	6.35647	6.22861	6.19536
213629_x_at	9.8645	9.5865	9.58084	8.96166	8.73545	8.70012	8.52973	8.32167	8.37236	8.32032	8.03548	8.48706	8.67885	9.27709	8.46476	9.10036	9.10243	9.17311
213640_s_at	5.36115	5.36036	5.37271	4.8976	4.98877	4.9897	4.94593	4.70443	4.97683	4.96878	4.81265	4.82444	4.57769	5.0725	4.60534	4.90309	4.53592	4.66753
213880_at	4.29683	4.47331	4.38587	3.73079	3.80467	4.01099	3.82752	3.74421	3.85831	3.93734	3.97707	3.98657	4.39199	4.02667	4.15217	4.51888	4.59833	4.49821
213995_at	5.22324	5.46019	5.43777	5.13899	4.74336	5.18949	4.63441	4.80287	4.92967	4.67174	4.93003	4.78193	4.65671	4.6078	4.77448	4.82701	5.07485	4.88267
214063_s_at	10.0582	9.96011	9.93124	7.66845	7.95905	8.00789	8.67326	7.51628	8.13074	7.35276	7.44255	8.08204	9.02998	9.34804	9.53946	10.6412	10.7808	10.7287
214150_x_at	7.62905	7.70791	7.57333	7.27654	7.0533	7.48118	7.09737	6.99979	6.96958	6.79562	6.76172	6.86933	6.82047	6.68171	6.91699	7.05537	7.11469	6.97534
214155_s_at	5.01927	5.41334	4.76153	4.69987	4.48411	4.26397	4.65463	4.5301	4.62942	4.25397	4.31947	4.37441	4.37412	4.33535	4.43867	4.21429	4.33822	4.03894
214240_at	5.70984	5.48244	5.58156	5.03705	4.84472	5.06634	4.95582	5.07989	4.8431	5.0431	4.88966	4.85069	4.98655	4.89099	5.13521	4.89356	4.89154	4.96614
214281_s_at	7.67741	7.41325	7.47896	6.71585	6.53715	6.73866	6.82316	6.54801	6.77161	6.58353	6.72695	6.6503	6.65279	6.3666	6.6622	6.62783	6.87997	6.47695
214658_at	4.45913	4.97402	4.83755	4.61033	3.99451	4.22485	4.4183	4.02105	3.89948	4.21726	3.82163	4.26557	3.99841	3.86442	4.10684	3.93529	3.99148	3.91992
214697_s_at	5.30152	5.63379	5.75988	5.05265	4.73962	4.87501	5.03221	5.06101	5.03801	4.98247	4.95319	5.04438	4.99305	4.99214	4.94198	4.92705	5.02898	4.82639
214801_at	7.02616	7.00374	7.06355	6.93573	6.68638	6.7554	6.65906	6.60588	6.59929	6.56244	6.32152	6.45688	6.35168	6.44315	6.58428	6.63616	6.57941	6.57488
214949_at	7.76214	8.08543	7.98743	7.70765	7.46	7.61287	7.17699	7.23609	7.26199	7.01604	6.86552	7.04557	7.31122	7.07147	7.17147	7.59154	7.51126	7.6271
215017_s_at	7.6155	7.8927	7.80981	7.50518	6.96616	7.01095	7.09667	6.76818	6.69958	7.16788	7.01953	7.01311	7.44169	6.94191	7.22261	7.30168	7.63285	7.49186
215177_s_at	7.46254	7.3021	7.42557	6.75083	6.70898	6.5809	6.51675	6.62712	6.56696	6.57783	6.74444	6.70516	6.82693	6.70664	6.55672	6.565	6.7141	6.77494
215509_s_at	7.06157	7.1357	7.1166	6.50861	6.34495	6.41964	6.52001	6.45998	6.18065	6.18173	6.37999	6.38067	6.39761	6.10742	6.23847	6.22269	6.25618	6.14464
215913_s_at	7.52553	7.5827	7.54079	7.27954	7.08306	6.91447	7.21186	6.9613	6.95495	6.91816	6.87911	6.98903	6.69148	6.73246	6.65377	6.89426	6.60631	6.90594
216041_x_at	8.4802	8.44911	8.41386	8.1817	8.29606	8.24152	8.06	7.87187	8.01415	7.834	7.78039	7.85091	7.6569	7.88601	7.83735	7.94608	7.94074	7.9993
216202_s_at	5.89014	6.03667	5.84647	5.30949	4.94817	5.46067	5.28492	5.175	5.34932	5.04795	5.21331	5.33123	5.17295	5.20655	5.21232	5.41911	5.59706	5.10576
216238_s_at	9.92159	10.0379	10.0225	8.20785	8.31205	8.07213	8.47253	7.61651	7.76721	7.43398	7.13301	7.47788	8.66984	8.83419	8.63518	9.59165	9.73524	9.5895
216336_x_at	8.81755	8.88645	8.7119	8.36182	8.09269	8.2818	7.90254	7.3693	7.97669	7.74951	7.54526	8.24072	8.36251	8.75496	8.12046	8.40745	8.60235	8.81737
217073_x_at	10.397	10.4867	10.315	8.61297	8.67737	8.61138	8.77379	7.74741	8.13875	6.75776	7.21282	7.16264	8.73631	8.67571	8.86983	10.3409	10.4995	10.2688
217165_x_at	9.83365	9.89945	9.86371	9.36007	9.00725	9.03365	8.84934	8.29975	8.72346	8.33798	8.46163	8.97426	9.18439	9.8563	8.83975	9.55612	9.55028	9.61033
217707_x_at	5.1205	5.17597	5.23905	4.69646	4.49744	4.68036	4.70655	4.75657	4.7254	4.55527	4.5923	4.56422	4.70698	4.78939	4.90275	4.92377	5.05186	4.96048
217776_at	8.12134	8.18986	8.11113	8.00819	7.67436	7.93102	7.89814	7.51505	7.71283	7.53407	7.55873	7.63706	7.64023	7.49866	7.61602	7.64351	7.78578	7.38396
218171_at	7.41589	7.65704	7.51455	7.27768	7.04575	7.03508	7.01525	7.15381	7.01221	6.9065	6.95521	6.93428	7.03684	6.89251	7.01033	6.74549	7.01272	7.00762
218247_s_at	7.77817	7.72831	7.56059	7.61134	7.06504	7.16656	7.22898	7.09306	6.94989	6.98415	6.92582	7.16439	7.02366	6.7558	7.18415	7.19107	6.99682	7.01076
218304_s_at	6.81675	6.69044	6.8389	6.43182	6.12645	6.31905	6.32086	6.25393	5.9608	6.09682	6.31005	6.32375	6.39967	6.15396	6.25578	6.3574	6.52815	6.19003
218516_s_at	6.88436	6.86904	6.85341	6.56808	6.60871	6.66355	6.54313	6.45291	6.3007	6.52485	6.17833	6.38279	6.16164	6.2482	6.12811	6.40096	6.39119	6.45719
218546_at	5.6126	5.55333	5.73294	5.43333	5.16732	5.46404	5.06649	4.95239	4.94674	5.08889	4.76786	4.92132	4.85246	4.9698	4.8156	5.14764	5.05524	5.15051
218668_s_at	6.57544	6.76616	6.84026	6.3279	6.21897	6.20459	6.2093	6.05968	5.99574	5.86735	6.09079	5.91191	6.02078	5.62737	5.91881	6.34335	6.38991	5.87536
218853_s_at	6.76494	6.68202	6.87286	6.33275	5.92388	6.47788	6.28282	6.11104	6.01579	6.24105	6.12947	6.12489	6.47066	6.19976	6.00897	5.83628	6.30499	5.94965
218946_at	6.66516	7.02666	6.92604	6.51179	6.16272	6.78115	6.45068	6.12316	6.28701	5.93514	6.21771	6.43205	6.06326	6.10012	6.09083	6.37925	6.45502	6.11001
218989_x_at	6.35952	6.27031	6.12365	5.73635	5.31968	5.77569	5.53478	5.22751	5.35835	5.45073	5.16635	5.48376	5.2474	5.13523	5.35062	5.42769	5.5561	5.59532
219117_s_at	7.46873	7.34297	7.19817	6.78627	6.75725	6.79067	6.62626	6.49405	6.37559	6.37624	6.32467	6.14901	6.54725	6.48596	6.67357	6.82445	6.85571	6.7149
219118_at	6.42601	6.50795	6.5324	6.12258	5.72493	5.90465	6.10978	5.67341	5.84806	5.62595	5.65595	5.80066	5.61119	5.77796	5.82187	5.84272	5.80863	6.12588
219140_s_at	8.81406	8.80888	8.62739	6.73359	7.18378	6.68747	7.37637	5.76958	6.45768	5.07052	5.68896	5.91768	7.76737	7.94409	7.88135	8.99375	9.1305	8.87193
219263_at	4.53638	5.30993	5.23079	4.23171	3.92556	3.94261	4.07832	3.78943	3.79773	3.86472	3.62772	3.86836	3.76324	3.88298	4.02848	4.23711	4.26742	4.17385
219402_s_at	8.0195	8.01277	8.03847	7.90133	7.75468	8.0023	7.65615	7.38712	7.5335	7.68294	7.3713	7.62412	7.45225	7.33469	7.39012	7.4638	7.56476	7.68655
219439_at	5.14757	5.32659	5.14563	4.73783	4.65752	4.46198	4.62731	4.37694	4.47406	4.47723	4.42599	4.60912	4.58336	4.34582	4.61167	4.58506	4.60808	4.63557
219612_s_at	8.673	9.03372	8.86835	5.92547	6.9247	6.71664	7.51676	6.6141	6.63142	5.94179	6.63491	6.87827	8.09749	7.91777	7.99498	9.1146	8.94865	9.19556
219736_at	4.42244	4.75045	4.50136	4.1564	4.12831	3.88482	3.98652	3.96017	3.93378	3.98523	4.02111	3.7932	4.02106	3.98629	4.29721	4.30122	4.64707	4.4599
219895_at	4.11712	4.10251	4.30304	3.85296	3.66221	3.70904	3.593	3.42403	3.57033	3.56803	3.43277	3.42858	3.41091	3.57754	3.49837	3.56666	3.56923	3.62166
220115_s_at	5.32916	5.46695	5.57477	5.13365	4.97355	4.63276	4.73338	4.87242	4.83995	4.95098	4.75929	4.78348	5.17295	5.03231	5.13521	5.34521	5.22904	5.28477
220239_at	7.12562	7.18519	7.04549	6.58111	6.52371	6.70617	6.89991	6.51278	6.43828	6.56893	6.245	6.7936	6.59614	6.44964	6.36309	6.4949	6.30847	6.4231
220283_at	6.35708	6.19866	5.78694	5.85815	5.78296	5.56434	5.5527	5.52807	5.61744	5.62706	5.46463	5.52326	5.37996	5.67551	5.37226	5.42063	5.3339	5.4813
220291_at	7.2271	7.20224	6.96454	6.53773	6.5727	6.55439	6.49776	6.48645	6.50549	6.43269	6.63036	6.52036	6.51834	6.61789	6.64665	6.56694	6.28365	6.40592
220448_at	5.50865	5.60883	5.57882	4.97474	4.91643	4.89057	4.59645	4.62311	4.56347	4.74591	4.65845	4.51912	4.42607	4.75742	4.70407	4.75091	4.50538	4.57005
220536_at	6.48138	5.91258	6.20396	5.69734	5.69614	5.64217	5.68827	5.47173	5.177	5.4988	5.04999	5.2844	5.37415	5.39584	5.48566	5.31551	5.32247	5.45517
220647_s_at	8.09647	8.19924	8.33079	8.15157	7.8742	8.07979	7.73451	7.79717	7.49574	7.81887	7.62537	7.56465	7.84664	7.55551	7.72659	7.88405	7.83528	7.83236
220990_s_at	7.29528	7.45325	7.44071	7.029	6.93475	7.11342	6.98056	6.58276	6.61083	6.3205	6.59321	6.62237	6.64478	6.52341	6.70135	6.84461	6.84408	6.52142
221024_s_at	6.46255	6.83417	6.75418	6.46491	6.24409	6.62553	6.27043	6.2151	5.90774	5.99448	5.91399	6.16629	5.9168	5.88114	6.19789	6.08957	6.34705	6.23298
221268_s_at	5.16875	5.53483	5.31037	4.69992	4.60506	4.85071	4.70198	4.61389	4.54294	4.55289	4.61696	4.46775	4.44521	4.49937	4.55559	4.33867	4.52263	4.42717
221423_s_at	6.98913	7.07435	6.97002	6.78068	6.3832	6.73037	6.44617	6.44524	6.49954	6.55357	6.11296	6.5564	6.23525	6.4622	6.42382	6.40679	6.58573	6.53402
221472_at	8.02235	7.93948	7.83178	7.62112	7.4965	7.52899	7.39942	7.52567	7.60897	7.46906	7.29726	7.39165	7.28608	7.20555	7.36891	7.45183	7.21757	7.43172
221473_x_at	8.07323	8.33191	8.12077	7.71666	7.6339	7.87276	7.65356	7.38131	7.56477	7.51464	7.51437	7.59095	7.5769	7.5428	7.52205	7.40487	7.51638	7.35131
221582_at	8.97758	8.86352	8.94302	8.95247	8.87044	8.90611	8.72006	8.66779	8.16676	8.54349	8.56926	8.30596	8.50472	8.18904	8.19208	8.69473	8.67509	8.61142
221589_s_at	7.06416	7.38651	7.37854	6.73052	6.38933	6.81167	6.44829	6.38727	6.64034	6.27548	6.28789	6.28891	6.33107	6.27254	6.30591	6.60964	6.54139	6.14978
221648_s_at	5.69284	5.47253	5.58346	4.99174	4.81818	4.96444	4.93609	5.01628	4.73196	5.14339	4.82477	4.93059	5.23685	5.2343	5.35336	5.49204	5.51726	5.44234
221666_s_at	5.66391	5.82436	5.62548	5.32422	4.99285	5.1092	4.90353	4.91606	4.93819	5.10431	4.86707	4.97927	4.86689	5.08819	5.1093	5.0601	4.92622	5.07639
221803_s_at	4.80237	5.01387	5.1348	4.6648	4.33567	4.55928	4.39533	4.14156	4.32816	4.34173	4.34581	4.22686	4.26873	4.02911	4.20161	4.50266	4.4083	4.10822
221963_x_at	6.63952	6.1879	6.49855	5.93452	5.88753	5.69679	5.56159	5.80296	5.67515	5.61651	5.71926	5.43454	5.39212	5.44022	5.61953	5.41925	5.33831	5.39083
222212_s_at	8.4082	8.41167	8.43156	8.36318	8.07766	8.31297	8.02178	8.00906	7.98102	7.90229	7.49904	8.0712	7.84466	7.69856	7.91775	8.1163	7.92447	8.11153
AFFX-DapX-3_at	9.16883	9.23404	9.17112	8.50499	8.28521	8.45147	8.49849	8.30586	8.59938	8.51475	8.0831	8.51315	8.19245	8.3494	8.33607	8.52421	8.53129	8.46185
AFFX-DapX-5_at	6.73175	6.8175	6.62374	5.93107	5.70318	5.90667	5.94717	5.72932	6.02163	6.02846	5.4331	6.02485	5.74234	5.71193	5.82442	5.72102	5.81609	5.71593
AFFX-DapX-M_at	8.50214	8.86276	8.72353	7.9366	7.58565	8.0392	7.94141	7.78126	8.03486	8.08039	7.54032	7.99415	7.6083	7.76859	7.68809	7.86202	8.07401	7.84813
AFFX-PheX-5_at	4.70823	5.06389	4.68577	4.35859	4.07092	4.36529	4.17947	4.37236	4.39526	4.24682	4.242	4.26838	4.19877	4.10804	4.41499	4.23603	4.25116	4.21464
AFFX-PheX-M_at	5.75919	5.89497	5.7688	5.18732	4.85194	5.25805	5.20144	5.07972	5.23296	5.33096	4.9884	5.27612	4.99932	5.07434	5.14114	5.00774	5.10594	5.09984
AFFX-r2-Bs-dap-3_at	9.20834	9.38271	9.40122	8.55974	8.11962	8.48142	8.49889	8.35357	8.53951	8.50929	7.82373	8.61673	8.03505	8.12756	8.34925	8.15233	8.21476	8.34933
AFFX-r2-Bs-dap-5_at	7.92464	8.43388	8.06518	7.22249	6.93476	7.26087	7.27008	6.78782	7.25123	7.34868	6.3493	7.19267	6.97145	6.89697	7.01135	7.10094	7.15248	6.98701
AFFX-r2-Bs-dap-M_at	8.30768	8.71203	8.45719	7.6668	7.44273	7.71823	7.7107	7.58851	7.57018	7.48666	6.91214	7.68177	7.19858	7.41966	7.64072	7.39567	7.64037	7.45448
AFFX-r2-Bs-lys-5_at	4.47016	4.68825	4.4836	4.03238	3.88294	4.11786	4.11308	3.92401	4.09484	3.86225	3.80991	4.13188	3.69156	3.84593	3.98943	3.95008	4.01416	3.78033
AFFX-r2-Bs-phe-3_at	5.85334	6.1078	5.73885	5.36595	5.11871	5.33482	5.35107	5.22243	5.3562	5.38718	5.24198	5.27095	5.40624	5.15728	5.35257	5.17286	5.42373	5.16316
AFFX-r2-Bs-phe-5_at	5.84209	5.29726	5.75527	4.69785	4.55126	4.90603	4.76948	4.56232	4.75818	4.76595	4.65607	4.71307	4.68892	4.68591	4.57375	4.23086	4.89893	4.73846
AFFX-r2-Bs-phe-M_at	5.08315	5.35751	5.37678	4.35763	4.1111	4.33535	4.28011	4.1989	4.29543	4.25689	4.12051	4.39571	4.06625	4.04068	4.18743	4.20455	3.97512	4.19718
AFFX-r2-Bs-thr-M_s_at	7.01096	7.36746	7.342	6.45712	6.14024	6.27831	6.4103	6.45088	6.56485	6.64794	6.04168	6.47677	6.06029	6.33848	6.3804	6.35071	6.36599	6.31952
AFFX-ThrX-3_at	7.30705	7.59288	7.39565	6.91709	6.74258	6.9827	6.89017	6.83692	6.97306	6.91164	6.7615	7.03344	6.65244	6.9089	6.87408	6.83519	6.9535	6.82856
AFFX-ThrX-5_at	6.03489	6.35164	6.03726	5.66469	5.46542	5.53972	5.56732	5.44354	5.56961	5.6482	5.44534	5.59992	5.41061	5.54744	5.60784	5.37984	5.65697	5.42209
AFFX-ThrX-M_at	5.72452	6.14009	5.97242	5.24336	4.97042	5.27497	5.10042	5.16283	5.20407	5.22859	4.85712	5.21873	5.10063	4.99256	5.20037	4.96004	5.25912	5.05019
200603_at	9.3852	9.21842	9.32659	9.05662	9.01217	9.21255	9.21294	8.92142	9.23266	9.31019	9.62905	9.43594	9.74729	9.52751	9.48666	9.5671	9.8285	9.39164
200605_s_at	8.78568	8.72951	8.83493	8.81179	8.51521	9.05667	8.92355	8.79888	8.72691	8.69282	9.04794	9.22329	9.24613	8.92191	9.18738	9.40135	9.49108	9.32238
200676_s_at	6.04541	6.08711	5.93008	6.4301	6.09013	6.53164	6.36792	6.40346	6.43943	6.37533	6.21971	6.38393	6.49519	6.38954	6.55995	7.06946	6.78184	6.48987
200794_x_at	7.59227	7.6319	7.47613	7.77011	7.72577	8.14729	7.88381	7.77022	8.12306	8.11328	8.2422	8.43773	8.31031	8.44576	8.44403	8.61663	8.87325	8.54534
200814_at	8.55031	8.41201	8.39832	8.0775	8.23052	8.4025	8.18921	8.18183	8.13869	8.47176	8.47707	8.41996	8.70841	8.66125	8.56189	8.61611	8.88377	8.8414
200952_s_at	6.78087	6.87937	7.1031	7.74492	7.61767	7.64615	7.9533	8.06837	7.89528	7.89074	7.99816	8.08125	7.95754	7.85263	7.95398	7.47138	7.80877	7.79947
200953_s_at	9.83431	9.81444	9.85187	10.4173	10.33	10.3552	10.4368	10.5632	10.2715	10.4245	10.4704	10.4733	10.613	10.4669	10.4057	10.4769	10.5246	10.4772
201007_at	7.9893	8.04213	7.80158	8.21637	8.21163	8.34779	8.37734	8.20758	8.43566	8.28261	8.5194	8.64009	8.75062	8.59763	8.55449	8.63568	8.62521	8.76945
201023_at	7.6869	7.83782	7.69655	8.05756	7.85504	8.12556	8.18895	7.8589	8.29371	8.1307	8.18812	8.13978	8.34275	8.13497	8.39468	8.5943	8.71846	8.52903
201056_at	4.9011	5.25418	5.11381	6.08036	5.99338	5.49998	5.89263	6.10612	5.93334	5.93512	5.86964	5.81143	6.0369	5.75657	5.76248	6.16631	6.25749	5.98324
201104_x_at	8.80558	8.7572	8.78077	8.99547	9.10936	9.14837	9.12684	9.19639	9.12697	9.21445	9.46355	9.3449	9.56619	9.35428	9.37799	9.74356	9.70742	9.63132
201105_at	8.29564	8.37773	8.11677	8.01744	8.02949	8.14122	8.0939	7.50216	7.85502	7.75598	7.95743	7.59194	8.0644	8.15565	7.88075	8.82768	8.71887	8.74087
201149_s_at	6.19461	6.36035	6.03521	6.14821	6.27126	6.53952	6.58162	6.56609	6.7305	6.88059	6.52048	6.73121	6.64123	6.67749	6.64879	6.76445	6.42534	6.64958
201150_s_at	5.933	5.69528	5.74678	5.85357	5.80505	6.48582	6.18251	6.07664	6.53756	6.22683	6.53984	6.4214	6.50584	6.39642	6.52784	6.65206	6.64409	6.48789
201151_s_at	3.52467	3.57664	3.55642	3.58036	3.45782	3.57679	3.70955	3.75787	3.59106	3.71172	3.73971	4.03853	4.06015	3.90779	4.14487	4.03948	4.50063	4.03872
201152_s_at	6.04182	6.42146	6.59074	6.61349	6.7123	6.87627	7.11845	7.07715	7.08507	7.16359	7.12641	7.66454	8.05472	7.74628	7.88171	8.11826	7.83783	7.88206
201153_s_at	5.69978	5.62046	5.61865	5.63601	5.89548	5.89849	6.20255	6.18202	6.1398	6.24291	6.32315	6.77929	7.00113	6.72622	6.86833	7.0386	6.93001	7.15137
201174_s_at	7.51889	7.54231	7.55223	7.77866	7.6416	7.85736	7.80811	7.52804	7.75059	7.81563	7.38763	7.89627	8.06701	7.81773	8.10339	8.4512	8.23927	8.43688
201286_at	6.1466	6.17816	6.16483	6.50246	6.30171	6.76005	6.72179	6.67329	6.45208	6.75051	6.83842	7.18577	6.81622	7.03209	7.26249	7.39036	7.2846	7.36522
201287_s_at	7.61434	7.72065	7.55427	7.85216	7.9548	8.11957	7.97522	8.04353	7.72913	8.03042	8.31028	8.24798	8.51634	8.35973	8.42803	8.47867	8.29571	8.20051
201307_at	8.96152	9.31455	9.24155	9.69478	9.88884	9.78409	9.9944	10.0447	10.0211	9.81984	10.1626	9.90514	9.94196	9.88228	9.86796	9.77889	9.88427	9.72702
201311_s_at	6.82054	6.97265	6.76845	6.87298	6.88683	6.9836	6.94949	6.90528	6.98535	6.9579	7.11426	7.24037	7.33694	7.19327	7.37599	7.74626	7.79529	7.50103
201328_at	6.49687	6.25178	6.32863	6.58614	6.62822	6.85853	6.89053	6.73973	6.99518	6.85047	7.27637	7.08046	6.97252	6.96407	6.97114	6.87424	7.01766	6.78336
201340_s_at	5.40055	5.5418	5.34936	5.40188	5.28291	5.52469	5.19356	4.81339	4.92453	4.89381	5.33815	5.65541	5.67575	5.60591	5.79165	6.19033	6.03658	5.78023
201341_at	8.71487	8.71007	8.65912	8.94791	8.66085	8.72765	8.43407	8.51302	8.30398	8.63876	8.71325	8.47069	8.93609	8.79336	9.03637	9.28892	9.41212	9.38864
201360_at	7.18545	7.5265	7.36868	7.48164	7.43605	7.81024	7.8015	7.57823	7.67561	7.50828	7.70972	7.83895	7.86562	7.77095	7.87534	8.36545	8.25915	8.23242
201418_s_at	8.09279	8.03906	8.11063	8.58052	8.51232	8.57922	8.45452	8.57599	8.52294	8.38658	8.55459	8.6163	8.56536	8.57342	8.67419	9.0837	8.88934	9.11135
201432_at	7.98211	8.13883	8.01775	7.86396	7.66327	7.87335	7.8614	7.50996	7.77488	7.73967	8.03154	8.2671	8.31897	8.32232	8.34975	8.64751	8.65815	8.65789
201464_x_at	7.95922	8.07438	7.96053	8.29126	8.30837	9.08836	8.78441	8.51107	8.06639	8.61119	8.28934	8.82175	9.07497	8.84936	9.26962	9.06038	9.03857	9.2797
201466_s_at	5.53089	5.6855	5.3757	5.77028	5.6923	6.50055	6.31717	5.94903	5.67396	6.36552	6.21263	6.31499	6.81194	6.19428	6.70254	7.14289	7.31736	6.75336
201648_at	5.28371	5.80392	5.8741	5.81429	5.92055	6.32806	6.12244	5.93981	6.18012	6.19288	6.36763	6.36749	6.53183	6.63133	6.5376	7.22267	7.3962	7.11156
201668_x_at	8.40564	8.29189	8.41238	8.74776	8.82701	8.98446	9.18286	9.2596	9.21277	9.17455	9.40913	9.45142	9.83125	9.6983	9.80408	9.69193	9.77213	9.78063
201669_s_at	9.86899	9.9406	9.87892	10.0417	10.0523	10.3022	10.4056	10.3951	10.3619	10.1637	10.3458	10.5795	10.8785	10.5948	10.649	10.8432	10.6146	10.5216
201670_s_at	8.64601	8.64237	8.67712	9.04524	9.04046	9.3796	9.36324	9.3612	9.43014	9.38861	9.55896	9.77464	9.94082	9.62389	9.89195	10.175	10.0897	10.1133
201731_s_at	8.15072	8.11892	8.19802	8.78776	8.66943	8.06658	8.832	8.80714	8.8131	8.81554	8.90727	8.8101	8.93838	8.58121	8.75322	8.76289	8.79615	8.77755
201760_s_at	6.36873	6.54778	6.32819	6.41455	6.17522	6.59889	6.56915	6.35007	6.32394	6.33498	6.77692	6.60627	6.73858	6.55127	6.72686	7.05935	7.36712	7.00855
201828_x_at	9.27832	9.20699	9.18658	9.28499	9.382	9.47272	9.322	9.30502	9.36244	9.37177	9.50622	9.59484	9.66727	9.66495	9.7103	10.1086	10.0345	9.91206
201841_s_at	8.37395	8.27478	8.16799	8.38401	8.71723	9.12856	8.57337	8.48165	8.6312	8.98667	8.88307	8.87891	8.87185	8.69037	8.83659	9.22935	9.18309	9.14307
201864_at	8.34398	8.1943	8.23034	8.19937	8.48336	8.34501	8.36734	8.45794	8.25155	8.43405	8.56416	8.49799	8.78451	8.61617	8.73581	9.0173	9.00578	9.00332
201865_x_at	6.07957	5.85093	5.93836	5.02374	5.43503	5.61026	5.7068	5.56228	5.69243	6.1672	6.28452	6.10847	6.19951	6.16667	6.2617	6.57487	6.54802	6.6514
201887_at	5.72992	5.90737	5.87052	5.58864	5.62139	5.86474	5.71956	5.82358	5.83775	5.82839	5.98027	6.1994	6.38607	6.23049	6.20459	6.2291	6.33224	6.33252
201952_at	7.76539	7.86375	7.84639	8.44075	8.22638	7.85616	8.32785	8.42877	8.20002	7.96959	8.07376	8.10407	8.34072	8.20289	8.41317	8.78179	8.89893	8.7647
201960_s_at	7.37792	7.31861	7.37129	7.69482	7.56043	7.29657	7.72957	7.61948	7.68266	7.49594	7.87628	7.8135	8.12019	7.67276	7.77205	8.21093	8.20665	8.05004
202008_s_at	7.39446	7.0091	7.15864	7.44499	7.52765	7.58797	7.80156	7.66221	7.85615	7.76504	7.74589	7.74554	7.75588	7.89463	7.72692	7.79925	7.92206	7.85253
202052_s_at	7.67817	7.65598	7.77683	7.94374	8.07576	7.84516	8.16849	8.28437	7.94341	8.12089	8.38284	8.45691	8.66885	8.32562	8.52231	8.57447	8.71346	8.71889
202089_s_at	7.65551	7.71686	7.71863	8.01807	8.13952	8.1606	8.31362	8.10582	8.026	8.15616	8.28662	8.46474	8.31002	8.26219	8.22724	8.24501	8.52061	8.31359
202124_s_at	4.90667	5.05661	4.8373	4.70271	4.58283	4.76919	4.72419	4.59876	4.728	4.61322	4.90184	5.09977	5.05239	5.12158	5.028	5.35347	5.30408	5.11477
202125_s_at	4.85504	5.05757	4.86345	4.75298	4.70795	4.62518	4.52701	4.55064	4.76308	4.59355	4.6225	4.90117	5.1352	5.05391	5.17157	5.28683	5.47123	5.2902
202136_at	7.55441	7.78724	7.69669	8.03916	7.83384	7.86018	7.93543	7.98119	7.7412	7.89891	8.03286	8.10888	8.30666	8.16713	8.29101	8.48515	8.32229	8.45281
202154_x_at	10.0791	10.2821	10.0237	10.0966	10.1974	10.292	10.1435	10.215	10.0891	10.0838	10.6427	10.3704	10.5827	10.6538	10.5923	11.0257	11.1506	11.0043
202202_s_at	3.83104	3.72217	3.982	3.915	3.99661	4.00272	4.21896	4.15478	4.1645	4.30434	4.50105	4.65047	4.74766	4.84726	5.12588	5.02435	5.26451	5.34612
202222_s_at	5.30507	5.43203	5.15073	5.17668	5.57867	5.55462	5.35626	5.66413	5.77644	6.18511	6.12713	6.0566	6.09066	6.07394	6.08822	5.91297	6.05065	6.09985
202259_s_at	4.59425	4.85632	4.7796	4.99848	4.73697	4.97122	5.1623	5.24491	5.45125	5.19276	5.04451	5.17049	5.30022	4.93217	5.31031	5.28335	5.45022	5.60784
202260_s_at	6.58648	6.37845	6.50923	6.15882	6.35448	6.65214	6.41236	6.43814	6.40638	6.60159	6.82102	6.70925	7.17178	7.01334	7.08516	7.11932	7.17812	7.18463
202262_x_at	8.18315	8.17181	8.25008	8.61014	8.80887	8.79129	8.70174	8.62738	8.58088	8.75261	8.94403	8.76826	9.07872	8.81574	9.01426	9.2918	9.37088	9.24012
202283_at	7.71546	7.54849	7.51021	7.69784	7.58576	7.73693	7.89594	7.7019	8.17223	8.19698	8.1877	8.03397	8.39405	8.4654	8.24178	8.69848	8.85299	8.7113
202341_s_at	6.91327	7.04781	7.00309	7.01622	6.86302	6.94838	7.08007	6.51475	7.14613	7.01291	7.30286	7.59406	7.51563	7.51408	7.52346	7.74039	7.79919	7.68894
202342_s_at	6.0388	6.26128	6.1303	6.56288	6.07541	6.32777	6.41436	6.18711	6.45061	6.44961	6.77239	6.88827	7.05512	6.78211	6.95072	7.17724	7.26331	7.1815
202363_at	5.07589	4.91756	5.11076	4.93399	4.8412	5.35402	5.19406	5.32272	4.97859	5.47223	5.58054	5.61622	5.86667	5.82259	5.69677	6.10653	6.37571	6.10121
202380_s_at	7.02841	7.20639	7.0602	7.56734	7.7156	7.17554	7.69586	7.61514	7.62066	7.72927	7.8682	7.65207	8.0079	7.75606	7.73373	7.95816	7.81301	7.85944
202391_at	10.2007	10.1042	10.0517	9.95104	9.99818	10.0505	9.96709	9.88903	9.74206	9.65637	9.87473	9.9958	10.3423	10.2746	10.3795	10.7631	10.7186	10.8612
202410_x_at	7.4124	7.14458	6.96669	8.04632	8.37163	8.21882	8.39486	8.24673	8.02747	7.8468	7.90575	8.08574	8.24684	8.48439	8.36497	8.82872	8.63301	8.81947
202423_at	8.10132	7.99377	8.18553	8.38369	8.3982	8.23219	8.43162	8.56653	8.63832	8.5038	8.85808	8.76493	8.95271	8.70661	8.71676	8.79153	8.88667	8.78454
202435_s_at	5.95721	5.73217	5.89019	5.95353	6.03479	5.99971	6.46823	6.42536	6.57294	6.28383	6.50563	6.69784	6.74019	6.68369	6.57193	6.67033	6.76226	6.62403
202436_s_at	6.35364	6.1766	6.21487	6.91755	6.98187	6.97172	7.67985	7.38215	7.60825	7.42345	7.88192	7.81622	7.7418	7.79285	7.82134	8.03026	8.14278	7.97555
202437_s_at	3.87964	4.01936	4.05657	4.77624	4.2577	4.41314	5.37507	5.307	5.48109	5.16121	5.17866	5.49649	5.66518	5.23947	5.8852	5.40945	5.58941	5.55148
202440_s_at	6.64694	6.51473	6.48108	7.12675	7.1713	7.17774	7.22997	7.39557	7.18692	7.23816	7.45014	7.43059	7.39905	7.29414	7.31808	7.34262	7.31254	7.32693
202447_at	6.8844	6.94932	6.93289	6.62782	6.77378	7.11022	6.95448	6.98826	6.90377	7.17776	7.17243	7.15826	7.63184	7.50718	7.53365	7.94751	7.71221	7.90036
202450_s_at	6.19262	5.59536	6.12771	5.62794	5.7778	6.08787	5.7279	5.85345	6.29921	6.37437	6.58212	6.28775	6.90544	6.95978	6.89049	7.19273	7.45198	7.28031
202465_at	8.60897	8.72374	8.64159	9.13792	9.12286	9.39487	9.40822	9.53791	9.6009	9.52062	9.65205	9.64865	9.67746	9.52709	9.59273	9.57157	9.46399	9.32864
202478_at	7.50652	7.47377	7.42202	8.01059	7.82427	8.22076	8.10853	8.10929	8.19346	8.1603	8.34009	8.32248	8.45117	8.3483	8.42666	8.78117	8.6066	8.6914
202479_s_at	6.13414	6.28569	6.07028	6.51575	6.38621	6.63507	6.53865	6.649	6.61894	6.63028	6.67922	6.71813	6.86218	6.85609	7.05286	7.17342	7.34031	6.94448
202484_s_at	4.10999	4.16095	3.94435	4.11931	4.12728	4.40098	4.46796	4.50621	4.63125	4.66439	4.87307	4.89115	5.39494	4.75025	5.24879	6.06566	5.93292	5.37648
202506_at	6.10946	6.15555	5.97436	6.38364	6.31597	6.27611	6.72284	6.77428	6.72895	6.79327	6.83927	6.55595	6.80239	6.68741	6.78864	6.65513	6.95009	6.73726
202507_s_at	5.61218	5.35972	5.24266	5.56126	5.51383	5.59757	5.60455	5.71651	5.72819	5.73496	5.78716	5.65207	5.85081	6.07328	6.13677	5.87952	5.84834	6.17514
202508_s_at	4.18879	3.95395	4.038	4.29357	4.17288	4.30475	4.37435	4.41795	4.37961	4.45657	4.6013	4.65845	5.13273	4.59422	4.93511	5.53166	5.23854	5.49294
202517_at	8.08158	8.09786	8.01511	7.9987	7.9811	8.07121	7.73075	7.94314	7.80635	7.98517	8.23862	8.23852	8.56575	8.62598	8.70984	9.04273	9.02691	9.1982
202554_s_at	6.08725	5.90791	5.85672	6.16683	6.25497	7.26054	6.88077	6.54013	6.88097	7.15772	7.33719	7.55488	7.58397	7.46693	7.68358	7.63062	7.81311	7.72021
202572_s_at	6.51384	6.39155	6.38727	6.76092	6.81475	6.77108	7.05138	7.18864	7.00464	6.79256	6.875	6.97951	7.09478	6.8893	6.97255	7.32775	7.26228	6.87766
202587_s_at	5.70733	5.84574	5.71371	5.98724	6.06616	6.36943	6.10998	6.16714	6.04406	6.0752	6.65291	6.40403	6.47293	6.25926	6.3205	6.88871	6.94414	6.73969
202599_s_at	7.62698	7.61051	7.81285	8.05401	7.9977	7.85096	8.48889	8.67352	8.7087	8.73446	8.91839	8.78944	8.6329	8.24626	8.5661	8.32095	8.51092	8.14323
202600_s_at	6.52402	6.74865	6.74402	7.10349	6.68216	6.84175	7.53834	7.55823	7.55583	7.81864	7.77609	8.38337	8.00827	7.7491	8.14442	7.50503	7.33272	7.30583
202629_at	6.54921	6.60451	6.59261	6.85028	6.77996	6.95491	6.99412	7.11335	7.20343	7.11661	7.34168	7.10121	7.23018	7.39604	7.19615	7.4102	7.4445	7.16452
202630_at	4.50807	4.32847	4.48766	5.00302	4.69216	4.903	5.03245	5.091	4.79062	5.05937	5.3968	5.18623	5.40834	5.08606	5.39415	5.75589	5.93602	5.69165
202743_at	6.59587	6.83171	6.49943	7.07147	6.9439	7.24622	7.0785	7.17721	6.54766	6.94255	7.58919	7.635	7.89065	7.68176	7.97251	8.25322	8.15828	8.10367
202765_s_at	5.73063	5.81837	5.47546	5.72361	5.54198	5.81274	5.96301	6.11426	6.06312	6.00836	5.91714	5.98596	6.1659	6.30348	6.41468	6.21866	6.21445	6.34167
202784_s_at	5.56807	5.69601	5.60925	5.89685	5.86185	6.06964	6.18204	5.89703	5.89979	6.08828	6.22779	6.39713	6.34346	6.13075	6.06809	6.18554	6.31229	6.10885
202786_at	4.35903	4.76942	4.80819	4.67972	4.67355	5.3187	5.20659	5.08768	5.1382	5.00385	5.34676	5.50585	6.18474	5.84797	5.8381	6.47663	6.15061	6.06397
202792_s_at	5.67668	5.27558	5.58651	5.41138	5.6035	5.577	5.5383	5.69086	5.66216	5.48452	5.84081	5.64115	5.91713	5.86871	5.82817	6.14419	5.98905	5.96926
202794_at	6.19957	6.27244	6.05804	6.18647	6.28025	6.31769	6.32486	6.15591	6.5101	6.45396	6.71566	6.67651	6.83165	6.89799	6.87781	6.97653	7.14422	7.00659
202796_at	5.52394	5.20633	5.3885	5.37764	5.72457	5.37339	5.49421	5.55138	5.57864	5.75622	5.79216	5.48879	6.21878	6.07251	6.10733	6.3682	6.24195	6.51144
202800_at	5.98919	6.40803	6.15453	6.71028	6.665	6.66765	6.79166	6.69105	6.68267	6.6899	6.79079	6.85027	6.87386	6.70298	6.91207	7.32805	7.46849	7.2357
202834_at	7.51332	7.64796	7.47255	6.38364	6.47208	6.65935	6.73996	6.12481	6.30921	6.0903	6.2387	6.40426	7.7337	7.87558	7.99646	9.04429	9.0565	8.92029
202878_s_at	6.96089	6.84175	6.84643	7.23458	7.03158	7.29709	7.49173	7.23412	7.4131	7.36588	7.33066	7.42377	7.37671	7.28328	7.47876	7.47473	7.67537	7.5577
202920_at	5.94613	6.01928	6.01689	5.93736	5.56421	5.78915	5.69578	5.86721	5.74006	5.58502	6.07819	5.99609	6.40064	6.29146	6.20459	6.98736	6.78752	6.47709
202936_s_at	7.38347	7.33263	7.32628	8.05353	7.59015	8.05277	7.81376	7.84822	8.10171	7.87161	8.23486	8.29229	8.62487	8.26145	8.42472	9.00928	9.09059	9.03078
202947_s_at	8.03472	7.82436	7.8522	8.25106	8.23591	8.39598	8.26086	8.12154	8.37631	8.58855	8.53852	8.79895	8.47207	8.78397	8.38652	8.63882	8.61665	8.59711
202949_s_at	6.78581	6.77617	6.71493	7.09721	7.10075	7.0958	6.97271	7.04247	7.0378	7.11188	6.72912	7.22923	7.42876	7.36736	7.26181	7.49114	7.38169	7.51276
202965_s_at	5.57258	5.22793	5.28019	5.24782	5.2963	5.37681	5.48117	5.37661	5.45377	5.61789	5.78868	5.46927	6.19297	6.05627	6.05421	6.498	6.50448	6.70367
202967_at	8.30674	8.23799	8.21293	8.51919	8.51288	8.77254	8.67986	8.6135	8.66317	8.72216	9.14216	8.9471	9.23619	9.14607	9.04178	9.48226	9.54248	9.50726
202982_s_at	4.92482	5.1614	4.91037	4.66726	4.69246	5.18848	5.03077	5.07569	5.3153	5.14143	5.3924	5.36856	5.37845	5.47962	5.60109	5.76226	6.06294	5.60872
202983_at	7.43112	7.37871	7.51616	7.33283	7.19767	6.96338	7.60413	7.23361	7.58888	7.54879	7.91648	7.8057	8.23458	7.83849	7.88631	8.27493	8.29079	8.03893
202986_at	5.34237	5.43712	5.43898	5.95363	5.59811	6.10757	5.88719	6.0578	6.0337	5.96827	6.40434	6.22751	6.32159	6.24299	6.2682	6.72828	6.94545	6.56119
203029_s_at	5.12874	5.30172	5.07933	4.71431	5.16555	5.78628	5.28759	5.46082	5.48846	5.93796	6.07181	6.09483	6.17164	6.46898	6.48927	6.70152	6.62673	6.64164
203030_s_at	5.52148	5.22059	5.17791	4.8481	4.94863	5.46087	5.27178	5.50621	5.73782	5.78327	5.94874	6.0294	6.30019	6.31018	6.2538	6.33331	6.38367	6.16312
203066_at	6.33576	6.43363	6.40709	6.02077	6.06132	6.40877	6.02751	6.23525	6.41792	6.30168	6.43467	6.53616	6.60491	6.79144	6.70483	6.50848	6.83175	6.87744
203080_s_at	6.43306	6.74989	6.32899	7.22515	7.09839	6.57642	7.34197	7.39537	7.35922	7.28396	7.24999	7.57823	7.64396	7.32158	7.56768	7.51247	7.33831	7.44624
203129_s_at	5.35328	5.36918	5.4111	5.47907	5.18068	5.27639	5.14986	5.12927	4.96543	5.07756	5.10288	5.50627	5.3899	5.47956	5.78785	6.01174	5.82322	5.85539
203130_s_at	8.15399	8.13295	8.22437	8.32029	8.25687	8.21463	8.06522	8.01012	7.91769	7.90364	8.28764	8.05339	8.53959	8.44463	8.67183	9.10754	9.39628	9.2347
203156_at	6.4126	6.54013	6.40688	6.67621	6.82432	6.36042	7.00962	6.91228	7.22895	6.81412	7.18019	6.93722	7.24014	7.02584	7.15441	7.16639	7.43177	7.052
203185_at	5.15822	5.20669	5.40592	5.05403	5.29556	5.28997	5.15617	5.34432	5.28332	5.28133	5.64854	5.40187	5.85584	5.61566	5.48056	5.88446	6.20036	5.87477
203232_s_at	4.16319	4.07864	4.09847	3.81994	4.05277	3.97134	4.17609	4.26248	4.2993	4.3467	4.46467	4.43728	4.90817	4.41341	4.94919	4.94911	5.03728	4.90326
203319_s_at	5.30749	5.70964	5.57999	6.01435	5.7911	5.61333	6.17654	5.85535	5.98969	5.88679	6.18222	6.43418	6.39809	6.13452	6.40665	6.43524	6.52	6.32262
203335_at	5.75475	5.76187	5.73394	5.21183	5.26135	5.40962	5.49869	5.46344	5.39792	5.47293	5.65491	5.60596	5.88604	5.98125	5.71223	6.04951	6.00878	6.31783
203340_s_at	5.88664	6.13788	5.98241	5.75202	5.9524	6.15838	6.17492	6.21451	6.37356	6.75807	6.77034	6.62728	6.93066	6.79085	6.71209	6.80057	6.83325	6.78664
203355_s_at	5.28848	5.63162	5.41165	5.90812	5.59631	5.82901	5.93147	5.9673	5.78044	5.56497	5.95852	5.9169	6.2654	5.89036	6.08586	6.28378	6.42472	6.40749
203413_at	7.73797	7.75276	7.95343	7.8124	7.63157	8.33663	8.0907	8.10332	8.04577	8.44921	8.54624	8.62153	8.42016	8.70011	8.73016	9.05817	8.92608	9.0179
203423_at	9.5275	9.38474	9.42239	8.96116	9.29884	9.65547	9.44966	9.49439	9.31838	9.69074	10.1635	9.92089	10.0937	10.0804	10.0343	10.4172	10.4541	10.174
203424_s_at	6.19659	6.24665	5.7603	6.9034	6.41788	7.16069	7.17189	7.35089	7.28486	7.19027	6.57783	7.6623	7.00984	7.38878	7.48033	7.47566	7.4918	7.73099
203427_at	4.87536	4.88832	4.80655	5.04289	4.7436	4.81693	5.06201	4.92697	5.2264	5.32365	5.36675	5.39339	5.35041	5.21225	5.42792	5.65751	5.79917	5.53783
203482_at	5.43629	5.62363	5.45285	5.9946	6.07939	5.76596	6.07672	6.25583	5.95329	5.74753	6.14117	6.1963	6.42513	6.04465	6.29587	6.51391	6.45208	6.21075
203502_at	4.6253	4.6278	4.52577	4.50449	4.3126	4.4802	4.42719	4.36452	4.37292	4.61623	4.42568	4.82988	4.49992	5.09891	5.00619	5.11389	4.82992	5.10467
203525_s_at	4.9765	4.87477	4.93151	5.31516	5.13835	4.63031	5.29071	5.26973	5.09269	5.26739	5.48965	5.44909	5.54349	5.36338	5.58017	5.77552	5.81626	5.71246
203526_s_at	4.95714	4.89597	4.85938	5.27149	5.24684	5.08746	5.44447	5.5448	5.40315	5.37072	5.37323	5.596	5.79281	5.45682	5.63893	5.66696	5.70245	5.6347
203562_at	7.2914	7.20774	7.19084	7.25861	7.05491	7.39081	6.81912	7.25542	6.89951	7.13756	7.06474	7.19127	7.6202	7.57206	7.61704	8.05599	8.25922	8.1861
203608_at	4.57321	4.59154	4.46193	4.83293	4.57807	4.94753	4.80798	5.0477	5.04166	4.88598	5.02819	4.93712	5.1767	5.02	5.00801	5.63806	5.8134	5.48813
203620_s_at	5.32246	5.18415	5.08638	5.0268	5.27017	5.21379	5.24126	5.18132	5.12381	5.2092	5.40266	5.49085	5.74266	5.42085	5.59424	5.83414	5.79862	5.94479
203666_at	7.12546	6.96352	7.38966	7.32326	7.36514	7.47993	7.47344	7.62784	7.71681	8.01114	8.02354	7.88215	8.52686	8.42882	8.6368	9.09959	9.16799	9.09834
203685_at	4.41898	4.29708	4.45545	4.65198	4.88549	4.86418	4.8058	4.88153	4.91911	4.74672	5.06093	4.88437	4.99041	5.01309	5.08597	5.29885	5.19246	5.12828
203723_at	4.94942	4.78634	4.8632	4.81553	5.01631	5.02394	5.04823	5.11196	5.06113	5.01922	5.23114	5.24245	5.137	5.22682	5.41792	5.68906	5.57421	5.62105
203724_s_at	4.34175	4.43014	4.47805	4.34899	4.72211	4.4947	4.71458	4.79446	4.57787	4.86465	5.10513	5.05491	5.654	5.33133	5.87108	6.0378	5.96836	6.54939
203749_s_at	5.16163	5.28024	5.25621	5.582	5.48727	5.69914	5.87372	5.67994	5.93505	5.6432	5.91672	5.80048	5.73344	5.83719	5.76203	6.03399	5.80345	5.83908
203795_s_at	6.12926	5.73795	5.67438	6.41089	6.44912	6.66496	6.73479	6.59353	6.33658	6.54694	6.64854	6.66582	6.88505	6.54316	6.86721	6.93458	7.0104	6.8778
203799_at	3.75259	3.85637	3.85053	3.77337	3.53871	3.61185	3.56971	3.68274	3.55895	3.86862	3.80701	3.74859	3.75209	4.11259	4.07994	4.52852	4.43731	4.37427
203817_at	4.59481	4.41508	4.35338	4.25668	4.35684	4.70986	4.39734	4.45925	4.59452	4.60846	4.7803	4.78639	4.923	4.83958	4.95474	5.16163	5.08117	4.96006
203855_at	4.60377	4.69761	4.62388	4.65316	4.34237	4.64131	4.45305	4.56667	4.79978	4.64691	5.02892	4.90715	5.39108	4.93152	5.45045	5.28556	5.52636	5.42899
203859_s_at	6.81745	6.71659	6.64216	6.94686	6.95833	7.0079	7.02019	7.17385	7.10971	7.08443	7.05812	7.21564	7.16982	7.51215	7.4667	7.82766	7.51595	7.36306
203861_s_at	6.44694	6.09605	6.74081	7.32997	7.63289	7.71538	7.3491	7.63701	7.47357	7.65604	7.88136	7.5525	7.57297	7.65605	7.40649	7.36637	7.40877	7.46473
203868_s_at	4.71257	4.76746	4.73658	5.59753	5.24637	6.17345	5.98945	6.07892	6.10821	6.1938	6.447	6.60861	6.90034	6.68554	6.86482	6.91604	7.03109	7.0202
203872_at	5.38702	5.09664	5.10942	7.13908	6.59086	6.89778	6.21766	5.97538	6.44167	6.33141	6.69005	6.86933	6.95326	6.74153	6.89179	7.07337	6.90937	6.79092
203921_at	5.07372	5.2896	5.11944	5.26239	5.1264	5.28315	5.54886	5.80443	5.66451	5.70625	6.03841	6.02718	6.2588	6.08757	6.14891	6.69953	6.66338	6.24392
203924_at	5.13115	5.08094	5.11581	4.27408	4.35279	4.26277	4.40984	4.46415	4.43858	4.45055	4.57418	4.58611	5.27192	5.05985	5.13507	5.89361	5.64669	5.78373
203929_s_at	4.4399	4.3852	4.46172	4.41799	4.55097	4.54762	4.46931	4.65829	4.59684	4.69639	4.84511	4.69497	5.06067	5.06638	5.29157	5.57415	5.62185	6.12388
203939_at	4.2564	4.26498	4.12982	4.26191	4.48713	4.45234	4.5849	4.43139	4.62632	4.53802	4.66571	4.62754	4.69582	4.94768	4.83716	5.14463	5.09157	4.99848
203940_s_at	5.65719	5.58631	5.55946	6.13435	6.21698	6.30911	6.04556	6.25195	6.19033	6.20593	6.74594	6.371	6.62624	6.72216	6.51271	7.03984	6.81646	6.73352
204018_x_at	11.9021	11.5575	11.6772	11.9363	11.4675	11.8529	11.4954	11.1709	12.034	12.4291	12.4122	13.4478	13.187	13.351	12.7516	13.0981	13.158	13.1939
204029_at	6.3978	6.33138	6.28653	6.48557	6.50373	6.88358	6.63626	6.76404	6.74295	6.6207	6.90975	6.80964	7.20867	7.11501	7.2094	7.34773	7.12318	7.22862
204030_s_at	6.91385	6.99714	6.96939	7.16644	6.89961	7.37468	7.45068	7.20618	7.4852	7.39361	7.60379	7.66115	7.87287	7.50742	7.74047	7.7624	7.85903	7.69647
204036_at	5.13654	5.06476	5.23539	5.23875	5.28212	5.48847	5.23104	5.43479	5.44624	5.56579	5.54487	5.89945	6.24405	6.11935	6.06207	6.57666	6.73094	6.69775
204037_at	5.73229	6.00713	5.86446	6.11728	5.85024	6.23513	6.15515	6.19234	6.00732	6.31555	6.50261	6.59254	6.78579	6.82232	7.20353	7.4638	7.4699	7.42945
204038_s_at	6.95947	6.57635	6.72408	6.54863	6.66252	6.60463	6.70293	6.8681	6.74174	6.89198	7.00996	6.96493	7.26919	7.2906	7.28852	7.37032	7.12713	7.306
204040_at	6.6285	6.9702	6.6754	6.79273	6.86555	7.2763	7.25589	7.14108	7.04031	7.4199	7.48574	7.63546	7.96091	7.55206	7.806	7.69284	7.7973	7.91587
204063_s_at	5.14462	4.94562	5.33421	5.27441	5.04392	5.23314	5.36051	5.51086	5.27848	5.2447	5.73934	5.38658	5.70501	5.59244	5.61413	5.68772	5.93727	5.51696
204069_at	7.60704	7.65091	7.55761	8.24577	8.23845	8.29965	8.36643	8.35763	8.20605	8.07846	8.23904	8.28888	8.3172	8.28548	8.25908	8.58859	8.65024	8.31499
204099_at	5.28552	5.47187	5.37055	5.70045	6.02821	6.04296	5.95684	6.0273	5.84346	6.10505	6.18215	6.28889	6.49785	6.21409	6.45267	7.036	6.78511	6.74239
204154_at	5.85065	5.84375	5.84566	6.03058	6.08425	6.38753	6.00807	6.04985	6.04841	6.17659	6.5457	6.41969	6.72574	6.5748	6.75478	6.55998	6.96891	6.97813
204236_at	3.88053	4.06163	4.15478	4.05727	3.62045	4.14448	4.01609	3.95602	3.97077	4.06909	4.30468	4.422	4.56433	4.205	4.8748	4.68144	4.81408	4.48088
204239_s_at	9.14159	8.75763	8.90564	9.39346	9.32504	9.48036	9.22817	9.3231	9.2557	9.39987	9.39747	9.47455	9.4962	9.50726	9.60807	9.78076	9.97562	9.87375
204246_s_at	7.89129	7.87548	7.90302	8.10566	8.20039	8.41622	8.29441	8.26914	8.37454	8.33778	8.53719	8.38213	8.35487	8.58001	8.54633	8.90738	8.79135	8.63667
204273_at	3.96621	4.12078	3.99649	3.71401	3.66138	3.81064	3.88579	3.93832	4.20537	4.10298	5.03597	4.75854	5.26313	4.75012	5.37403	4.94374	5.28694	5.52125
204288_s_at	6.03119	5.62817	5.93871	6.44952	6.52905	6.8597	6.72938	6.70748	6.84264	6.67755	6.97696	6.90083	7.40973	7.074	7.2395	7.38172	7.54553	7.47623
204301_at	5.16728	4.8432	5.01861	5.19916	5.44368	5.7369	5.35603	5.61909	5.79777	5.74485	6.33114	5.95687	6.02437	6.02627	6.21012	6.14507	6.3691	6.14758
204319_s_at	5.62921	5.8651	5.69481	5.86439	5.63738	5.88546	5.86785	5.47739	6.09931	5.93093	5.83531	6.73782	6.0261	6.40833	6.25517	6.64675	6.72391	6.51944
204320_at	5.18554	4.78299	4.98636	5.87684	5.92481	5.86079	6.34284	6.31297	6.70858	6.60659	6.35628	6.25256	6.63081	6.48397	6.58617	6.45176	6.78473	7.15265
204334_at	6.49685	6.34804	6.67161	6.32739	6.496	6.61577	6.50989	6.6449	6.64847	6.76062	6.76289	6.85178	6.79718	6.92178	6.94567	7.13484	7.37268	7.1303
204358_s_at	6.45463	6.2935	6.23579	6.4301	6.09939	6.41213	6.43871	6.7736	6.11296	6.30426	6.55878	7.10421	6.8501	6.76086	6.97731	7.11078	7.17128	6.92693
204359_at	8.39403	8.41813	8.38287	8.81652	8.765	8.7804	8.97423	8.98668	8.84445	8.65236	9.08933	9.10996	9.2921	9.01234	9.14792	9.29961	9.54054	9.34855
204364_s_at	5.49865	5.47974	5.70148	5.22479	5.50621	5.52933	5.39508	5.37452	5.27442	5.14354	5.56377	5.5403	5.8567	5.76326	5.91124	6.71154	6.69453	6.72824
204365_s_at	6.27609	6.05134	6.08358	5.85597	5.96806	6.27958	6.23862	6.17296	6.16051	6.34501	6.35773	6.21618	6.48854	6.67605	6.67612	6.99263	7.30978	6.82653
204396_s_at	6.07765	6.34905	6.19431	6.85402	6.65784	6.92876	6.98545	6.92306	7.04708	6.74948	6.86213	6.88023	6.87776	6.7518	6.80541	6.97056	7.06714	7.09314
204418_x_at	7.18847	6.96705	7.00379	7.079	7.15403	7.00627	6.98394	7.18408	7.56765	7.57036	7.45537	7.1819	7.54097	7.57858	7.79346	7.58766	7.70094	7.63172
204419_x_at	12.3498	12.3492	12.3138	12.6404	12.1163	12.5579	12.1358	11.8157	12.6898	12.8495	12.729	13.8138	13.2728	13.603	13.1768	13.2376	13.3531	13.3958
204424_s_at	6.80888	6.33848	6.65482	6.44354	6.58932	6.78524	6.67093	6.66105	6.86609	7.13046	7.23407	6.96902	7.20906	7.12489	7.35963	7.6453	7.71788	7.50348
204451_at	5.95714	5.89823	5.81401	6.19181	5.88563	6.51036	6.05972	5.99352	5.99088	6.05374	6.44865	6.44114	6.63436	6.58329	6.67989	6.66849	6.6784	6.82312
204456_s_at	6.89634	6.62686	6.87244	7.02921	6.93301	7.33565	7.35784	7.41164	7.31267	7.39148	7.41047	7.51463	7.44758	7.09956	7.50999	7.67197	7.556	7.65394
204463_s_at	4.04583	4.74071	4.20937	5.43763	5.57468	5.94345	6.30526	6.38186	6.28871	6.28727	6.44203	6.78023	6.79127	6.30245	6.73483	7.08891	7.02164	6.88497
204464_s_at	5.66639	5.94769	6.08247	7.39157	7.6125	8.03093	8.34382	8.46153	8.42718	8.07053	8.64714	8.37371	8.70085	8.24424	8.40932	8.73197	8.75198	8.62053
204466_s_at	6.73571	6.84485	6.88971	6.95393	6.67527	7.0974	7.20188	6.95342	7.25305	7.28246	7.27255	7.39448	7.22814	7.39586	7.13657	7.26306	7.53097	7.21049
204529_s_at	4.24055	4.20818	4.15005	3.72966	3.90675	4.31546	3.92032	3.9214	4.31034	4.20315	4.51442	4.31559	4.80011	4.76662	4.40976	5.55597	5.93956	5.40699
204550_x_at	6.92887	6.83529	6.82935	6.87503	6.9302	6.76573	6.66398	6.96659	7.32668	7.37895	7.30435	7.03726	7.32231	7.35599	7.67213	7.21341	7.29792	7.22318
204556_s_at	6.50212	6.49631	6.50242	6.7448	6.8958	6.71853	6.93631	7.08048	7.20216	7.04279	7.42509	7.0111	7.23123	7.24839	7.06384	7.46739	7.27908	7.32941
204557_s_at	4.67872	4.65636	4.70558	4.9841	4.88328	5.11923	5.39082	5.5539	5.43209	5.072	5.51538	5.25329	5.59077	4.97218	5.40288	5.67097	5.70328	5.31211
204561_x_at	7.13012	6.93176	6.87468	6.14686	6.27835	6.14384	6.43749	6.34861	6.28458	6.71769	6.53974	6.47382	7.33113	7.23296	7.33405	8.14823	8.22459	8.43176
204584_at	5.01704	4.7065	4.79714	4.59929	4.62183	4.59072	4.7252	4.81715	4.98389	5.10783	5.03644	4.96246	5.38244	5.57932	5.24428	5.53948	5.67926	5.38808
204589_at	7.16205	7.19434	7.12232	7.32519	7.14349	7.56381	7.65069	7.46296	7.63369	7.60819	7.95135	7.93397	7.8836	7.93534	7.73198	8.09286	8.23578	8.02799
204612_at	6.71063	6.7078	6.64057	6.75343	6.8477	7.05606	6.93523	6.79427	6.80726	7.06393	7.20414	7.38765	7.29274	7.4184	7.29465	7.47548	7.78145	7.58822
204672_s_at	4.50046	4.77446	4.5761	4.94209	4.73126	4.69547	4.89044	4.9007	4.83467	4.86928	4.9658	4.95269	5.35652	4.8595	5.23224	5.51179	5.51231	5.20812
204688_at	5.84117	6.27061	6.1241	6.32393	6.06363	6.38821	6.29357	6.246	6.41884	6.19883	6.30557	6.12752	6.25529	6.01226	6.37176	6.95117	6.81275	6.70317
204703_at	5.6008	5.5103	5.56705	5.82563	5.80874	5.51241	5.90563	5.9227	6.11853	5.84421	6.24792	5.90491	6.35736	5.80191	6.15208	6.17822	6.15882	5.99121
204705_x_at	4.83572	4.99165	4.90497	4.89439	4.81003	4.74092	4.93272	5.05164	5.05069	4.95114	5.13751	4.9549	5.27703	5.55413	5.56573	6.61458	6.67513	6.87421
204712_at	3.9406	4.01232	3.95882	4.35077	4.08192	4.14134	4.0055	3.9214	4.03399	3.9317	3.93424	3.99519	4.55203	4.12344	4.42688	5.29951	5.71137	5.03424
204730_at	5.01529	5.01652	5.11613	4.89484	4.94273	5.03467	4.82083	4.8834	5.02548	4.87059	5.45389	4.81042	5.41106	5.11742	5.09983	5.56597	5.69726	5.55223
204737_s_at	4.48711	4.65238	4.48416	7.9263	7.82457	8.07113	7.32377	7.59454	7.27327	6.63561	7.33367	7.15102	6.92261	6.26464	6.86928	6.69606	6.482	6.42464
204759_at	6.74266	7.10218	6.92759	7.15318	6.97015	7.44796	7.36446	7.08225	7.45043	7.22241	7.28548	7.50777	7.48365	7.4376	7.59221	7.55126	7.73145	7.67123
204773_at	5.35132	5.34175	4.82962	5.35711	5.31708	5.64575	5.53475	5.32386	5.528	5.84741	5.51549	5.97781	6.44663	6.12887	6.5643	6.82694	6.74672	7.15562
204776_at	7.01228	6.92676	6.88567	7.09079	6.98011	6.93646	6.86841	6.8341	6.98696	6.89372	6.66314	6.71859	6.83176	7.06161	7.32409	7.85215	7.64355	7.64977
204802_at	3.832	3.62145	3.76658	4.70126	4.83682	4.98459	5.00501	4.87555	5.23798	4.4746	4.80257	4.8176	4.58488	4.40015	4.66435	4.6392	4.4906	4.37487
204803_s_at	4.59062	4.81546	4.54811	5.86622	5.77793	6.1845	6.18827	6.20124	6.20066	5.76089	5.90481	5.87866	5.74921	5.52443	5.76317	5.34954	5.5103	5.21293
204810_s_at	5.62357	5.17334	5.31824	6.25507	6.16641	6.38364	5.97219	6.25814	6.35989	6.50404	6.59118	6.20916	6.0745	6.38906	6.40082	6.3288	6.26148	5.95507
204823_at	4.90437	4.81294	4.82986	4.91805	4.90247	4.78974	4.79721	4.93525	5.09998	5.18927	5.13316	5.15189	5.22228	5.30717	5.61844	5.84664	5.99287	5.91635
204848_x_at	12.3643	12.2598	12.2729	12.4518	11.9646	12.3603	12.0133	11.7211	12.5339	12.8481	12.6701	13.6358	13.2791	13.4903	13.0643	13.2214	13.3389	13.382
204913_s_at	7.96862	8.03251	7.99503	7.99154	7.90012	8.24947	8.12163	7.85225	8.08886	8.04216	8.3904	8.75446	8.7887	8.88824	9.25642	9.15584	8.9902	9.07953
204914_s_at	9.03509	9.0095	9.05533	9.20621	9.05395	9.34055	9.03289	9.38907	9.33805	9.21842	9.67535	9.68449	10.2275	9.9427	10.1799	10.4142	10.4772	10.58
204915_s_at	7.9472	7.83648	7.79916	8.32232	8.28004	8.32894	8.13685	8.50884	8.32931	8.21957	8.68675	8.5374	9.21555	9.03784	9.15309	9.43627	9.57879	9.53493
204920_at	5.59601	5.89622	6.0253	5.91496	5.72353	5.92908	5.82298	5.71976	6.0737	6.00568	5.9631	5.65238	6.24107	6.06341	6.10722	6.95209	6.9136	6.58411
204939_s_at	5.38191	5.1919	4.83617	6.08479	6.10884	5.97823	5.82767	6.029	5.85388	6.2569	6.13295	6.03834	5.99883	6.06099	6.2063	5.83452	6.00571	5.86942
205029_s_at	4.30033	4.43779	4.40081	5.70403	5.685	6.47215	6.27287	6.36211	6.14296	6.12658	6.31803	6.30628	6.10449	5.77754	5.81842	5.68282	5.87376	5.53417
205030_at	6.10438	5.87913	6.02971	7.19896	7.39569	7.85741	7.76245	7.55919	7.65422	7.91337	7.69444	7.909	7.46831	7.45096	7.54047	6.89985	7.4113	7.35449
205040_at	4.39674	4.42076	4.31839	4.20341	4.33754	4.43878	4.06227	4.27748	4.2545	4.36747	4.44983	4.3097	4.72308	4.76371	5.04064	4.75706	5.22904	5.01791
205041_s_at	3.80935	3.78591	3.64125	3.47175	3.70083	3.60577	3.43646	3.57822	3.60133	3.61171	3.7963	3.72532	4.05366	4.27148	4.09448	4.4846	4.55411	4.61019
205046_at	6.28281	6.02746	6.25001	6.84852	6.60686	5.95053	6.98884	6.77361	6.71235	6.80247	6.97381	6.83609	7.33253	6.81631	6.87823	6.96924	7.24664	7.03235
205054_at	4.26948	4.10559	3.95282	4.09658	4.16379	4.10882	4.27557	4.41077	4.17318	4.45426	4.52842	4.50996	4.63951	4.78695	4.68652	5.23357	5.27941	5.06409
205075_at	4.25529	4.01651	4.23759	4.08758	4.44229	4.06495	4.25457	4.21641	4.13666	4.32667	4.49078	4.37957	4.58278	4.81968	4.48193	5.48974	5.6952	5.26983
205116_at	3.88973	3.614	3.70579	3.68648	4.03305	3.78478	3.76711	3.78884	3.77971	3.88817	3.93299	3.83457	4.23259	3.98418	4.20769	4.42314	4.5837	4.54676
205143_at	5.86429	5.69397	5.78005	5.62238	5.52646	5.26523	5.25326	5.39485	5.38677	5.52356	5.42369	5.50962	5.63455	5.87716	5.5266	5.89398	6.03642	6.14475
205150_s_at	5.89305	5.87403	5.77457	6.05911	6.12623	6.32385	6.13222	6.3766	6.20185	6.39147	6.95917	6.88473	7.28282	7.14972	7.18143	7.17713	7.49513	7.25097
205168_at	6.50101	6.37403	6.60516	6.55576	6.6953	6.82373	7.00491	7.15317	7.05291	7.0983	7.2737	7.21998	7.41616	7.31289	7.20151	7.25621	7.29281	7.279
205177_at	6.58078	6.59298	6.67438	8.23321	8.46364	8.46581	8.05855	8.07714	8.08127	8.07868	8.21463	8.08703	7.78186	7.63535	7.68282	7.78939	7.91981	7.72107
205201_at	7.35577	7.47031	7.39698	8.05551	7.93283	8.04929	7.9742	8.12103	8.01407	7.93792	8.03961	8.07363	8.13433	8.12409	8.13577	8.3485	8.16834	8.17136
205221_at	4.3602	4.13316	4.17446	4.09724	4.256	4.15089	4.10887	4.02216	4.29175	4.31356	4.28399	4.35804	4.53218	4.59225	4.57139	4.99293	4.74007	4.55223
205240_at	6.0143	6.01433	6.17376	6.47181	6.51952	6.57788	6.67133	6.79646	6.69555	6.65332	6.9639	6.78802	7.10073	6.99525	7.03318	6.92989	7.11175	7.1188
205257_s_at	5.33394	4.85247	5.29452	5.20679	5.19513	5.3103	5.09112	5.59471	5.41437	5.64532	5.66318	5.7119	5.78985	5.88474	5.95063	6.35816	6.30976	6.20429
205279_s_at	4.75501	4.85072	4.89856	4.88256	4.93368	5.0886	5.22952	4.95905	5.24274	5.28029	5.51996	5.22822	5.50077	5.49451	5.39312	5.49148	5.35513	5.42198
205302_at	3.31345	3.50761	3.5653	3.57237	3.45996	3.59589	3.41236	3.4791	3.59913	3.6989	3.70662	3.65147	3.88099	4.44795	4.0768	4.43171	4.21444	4.21632
205311_at	6.08071	6.16103	5.89985	5.46778	5.32083	5.64112	5.48858	5.07591	5.2586	5.70916	5.55886	5.71984	6.14553	6.12271	6.24357	7.02257	6.65047	6.9357
205320_at	6.11996	6.07085	5.87667	6.04733	6.10445	5.95772	5.92455	6.26261	5.93236	6.07546	6.29415	6.22345	6.51539	6.59038	6.54595	6.63131	6.67867	6.76334
205330_at	6.48493	6.57955	6.64417	6.93874	6.55305	6.95769	6.66135	6.96103	7.09338	6.62977	7.23958	6.9883	7.39845	7.1523	7.33171	7.56284	7.88423	7.42707
205350_at	8.11861	8.0231	8.04645	9.48591	9.25281	9.6425	9.36314	9.39853	9.186	9.26694	9.45772	9.30977	9.55241	9.27145	9.61562	9.74323	9.55542	9.67459
205358_at	3.73575	3.84907	3.88559	3.90632	3.95545	3.98029	3.97743	3.93288	4.07009	4.13303	4.14778	3.92916	4.48803	4.30354	4.08565	4.87177	4.4716	4.63161
205383_s_at	5.97053	5.82159	5.86516	5.77818	6.10003	5.81746	5.95232	5.92784	6.17166	6.14102	6.09782	5.96126	6.525	6.32739	6.42289	6.55377	6.61602	6.73282
205405_at	6.25188	6.43395	6.27918	6.56914	6.57449	6.59728	6.75806	6.84127	6.77087	6.78005	6.9521	6.78685	6.98049	6.89821	6.88681	7.22324	7.0374	7.09315
205412_at	7.26984	7.34885	7.18312	7.2333	6.94733	7.25696	7.29227	7.1253	7.3395	7.28323	7.4763	7.48724	7.60889	7.8045	7.65137	8.08621	7.93637	7.76341
205413_at	5.23518	5.56243	5.4005	5.33397	5.05831	5.54975	5.24126	5.4141	5.37812	5.35449	5.30162	5.79009	5.95529	5.91737	6.22841	6.9755	6.4577	6.90772
205433_at	4.1126	4.0597	4.12418	4.20253	4.20253	4.15386	4.5888	4.41092	4.71998	5.01226	4.84426	4.95638	4.7935	5.32795	5.20151	5.43351	5.53212	5.28606
205471_s_at	5.31561	5.47801	5.52219	6.17715	5.86518	6.10602	6.32551	6.50772	6.46921	6.21719	6.73436	6.63639	6.58486	6.34614	6.55656	6.50012	6.63063	6.43978
205472_s_at	4.11066	4.06976	4.09352	4.58265	4.32364	4.85477	4.76531	4.7194	4.95231	4.79408	4.87968	5.02481	4.84867	4.88962	4.90448	5.02375	5.17036	4.99357
205475_at	4.26541	4.52994	4.57965	4.32491	4.76434	4.6516	4.97872	4.72033	5.0727	5.06906	5.18127	5.48535	5.36343	5.6893	5.55251	5.39769	6.01026	5.71825
205492_s_at	5.76349	5.70814	5.82327	5.90864	6.01018	6.18833	6.0298	6.11997	6.24438	6.31627	6.61078	6.46781	6.58021	6.80257	6.92614	6.97451	6.53616	6.99256
205501_at	4.27234	4.50502	4.15881	5.43437	5.1605	5.06999	5.42682	5.43427	5.18799	5.07686	5.76364	5.41076	5.74051	5.22575	5.37849	5.65615	5.85511	5.20476
205516_x_at	7.24369	7.24527	7.47948	7.78876	7.83241	7.86561	7.98263	7.89372	8.03751	7.82302	7.9067	7.94247	8.02026	8.13638	7.89217	8.20135	8.05907	8.14085
205522_at	6.59846	6.68276	6.61185	8.30486	8.33201	8.2467	8.54791	8.62003	8.53432	8.61441	8.56659	8.66766	9.01716	8.68947	8.69059	8.6299	8.78203	8.65096
205528_s_at	4.64902	4.64547	4.64751	4.80925	4.46215	4.53304	4.76148	4.8288	4.68509	4.47893	4.87561	5.27332	5.72226	5.48074	5.86937	5.89679	6.13688	5.90002
205529_s_at	6.36859	6.33488	6.32527	6.4865	6.58066	6.59753	6.68263	6.67287	6.78145	6.57059	6.83492	7.13271	7.08197	7.38755	7.40832	7.50061	7.60962	7.60282
205546_s_at	6.68936	6.46402	6.6374	6.47008	6.66142	6.82407	6.81956	6.77439	6.86699	6.85156	7.19394	6.94166	7.29162	7.11076	7.10341	7.29768	7.46758	7.3318
205547_s_at	5.57452	5.83704	5.79209	6.71337	7.03027	7.4125	7.48846	7.31789	6.9617	7.2285	7.6036	7.54275	7.19478	6.93408	7.0712	7.33817	7.12664	7.04862
205548_s_at	7.3661	7.41919	7.34719	7.64311	7.49327	7.80896	7.77722	7.62664	7.61165	7.7868	7.89073	8.0063	7.99169	7.82779	8.05731	8.06428	8.04805	8.01297
205549_at	4.35213	4.15461	3.94665	4.2225	4.40577	4.40926	4.09921	4.28011	4.46212	4.28049	4.59353	4.47197	4.73219	4.8	4.66458	5.15377	4.92974	4.78813
205553_s_at	4.96174	4.74454	4.96555	5.81	5.9336	6.29121	6.00505	6.23508	6.14056	6.32827	6.87117	6.21104	6.2913	6.39092	5.99947	6.14768	6.05231	5.93161
205576_at	5.06341	5.05476	4.97596	3.70665	3.88439	3.9227	4.04805	3.98798	4.04675	3.93221	3.89629	3.95053	4.55072	4.4033	4.68333	6.0651	6.22771	5.81992
205589_at	5.93866	6.07271	5.88713	7.60086	7.79481	8.2099	7.9355	8.16564	8.00765	8.24699	8.31531	8.17442	8.0943	7.83333	7.87085	7.5602	7.48016	7.41609
205592_at	6.98677	6.71707	6.78811	6.74983	6.53487	6.69965	6.68064	6.54478	6.96756	7.24669	6.91513	7.74255	7.49466	8.09834	7.43808	7.45412	7.5503	7.49834
205601_s_at	6.60838	6.43765	6.60959	6.418	6.62586	6.83862	6.71807	6.6105	6.73159	6.83606	7.01145	6.95001	7.1367	6.94864	7.05214	7.30492	7.24286	7.18978
205604_at	6.57808	6.43377	6.53038	6.74461	6.72149	6.72494	7.05287	7.04458	7.04173	7.11524	7.01876	7.01047	7.1643	7.11014	7.00006	7.15864	6.94199	7.1435
205612_at	3.65076	3.69852	3.66869	3.60066	3.58383	3.87159	3.93623	3.85123	4.08322	4.27109	4.28004	4.29056	4.0409	4.2716	4.20118	4.16992	4.26411	4.10257
205614_x_at	8.20556	7.89209	8.09196	7.66023	8.01271	7.66546	7.75539	7.6229	7.56899	7.81193	7.64143	7.87848	8.06055	8.28365	8.07174	8.47361	8.17187	8.33601
205638_at	3.63795	3.62321	3.48063	3.65337	3.55032	3.40051	3.63456	3.70822	3.69411	3.75426	3.83695	3.84446	4.11964	3.94927	3.86409	4.12449	4.33085	4.32659
205642_at	6.21638	5.83103	5.9085	5.9882	6.29978	5.78936	6.18369	6.37366	6.49329	6.32134	6.4871	6.32419	6.53302	6.73417	6.46354	6.37307	6.6807	6.67202
205646_s_at	6.36359	5.56318	6.35166	7.86906	8.01524	8.38997	8.15183	8.27609	8.20887	8.2435	8.42512	8.28453	8.07008	7.99258	7.88914	7.91078	7.97369	8.06158
205682_x_at	7.63426	7.68499	7.72025	6.99428	7.0199	7.07468	7.40047	6.64018	7.232	7.03269	6.69271	6.97631	7.48632	7.72553	7.71161	8.75235	8.74264	8.78733
205717_x_at	7.56116	7.66235	7.34348	8.08263	8.10019	8.38375	8.37051	8.61114	8.66267	8.49232	8.797	8.72241	8.99438	8.92059	8.87549	9.04885	9.01655	9.00417
205754_at	6.94796	6.94562	6.91233	6.65899	6.63848	6.53039	6.50215	6.68103	6.58193	6.53007	6.52852	6.41695	6.98476	6.90463	7.14035	7.58548	7.78823	7.75131
205774_at	6.00937	5.78274	6.11039	5.88945	6.13364	6.1036	5.89375	6.08541	6.00386	6.098	6.31866	6.09242	6.114	6.45142	6.44051	6.79474	6.87146	6.92998
205777_at	6.36437	6.23434	6.30755	5.97032	6.41952	6.49386	6.44872	6.00588	6.41502	6.39101	6.76086	6.78066	7.29367	7.29137	7.32845	7.75524	8.04264	7.6705
205794_s_at	6.20993	6.34196	6.46733	6.55454	6.72974	6.86146	6.63224	6.80023	6.81785	6.97585	7.4079	7.04526	7.23739	7.46064	7.48182	7.63228	7.77233	7.87621
205817_at	5.57143	5.37932	5.37297	6.06418	6.21673	6.09605	5.93428	5.96924	6.04273	6.01912	6.18535	6.02648	5.94925	5.95389	5.84797	6.2376	6.26953	5.98663
205858_at	4.81099	4.64107	4.73913	4.81559	5.09718	4.74944	5.07732	5.22813	5.04582	4.8753	5.31261	5.20301	5.20068	5.32724	5.49415	5.76342	5.46821	5.63061
205883_at	5.93606	5.82988	6.07753	6.90977	6.84437	7.20509	7.26472	7.32475	7.29142	7.13323	7.30317	7.03721	7.15938	6.80721	6.93846	6.59777	6.76665	6.64164
205888_s_at	6.12198	5.95502	6.12179	5.79125	5.90676	5.84105	5.84127	5.6897	5.79754	6.27548	6.24117	6.24634	6.12899	6.43404	6.40564	6.58005	6.41811	6.47634
205919_at	12.5974	12.6151	12.569	12.7333	12.4299	12.7215	12.5114	12.0542	12.9694	12.8712	12.8652	13.5019	13.3517	13.6185	13.262	13.2408	13.4196	13.4479
205927_s_at	5.64686	5.66139	5.64993	5.48297	5.59631	5.54831	5.54335	5.66685	6.03535	5.91924	5.89718	6.35042	6.05736	6.19375	6.14046	6.08525	6.27864	6.05612
205933_at	6.23688	5.89173	6.1507	6.44471	6.29115	6.46872	6.37835	6.35033	6.2752	6.56802	6.58097	6.73452	7.10793	6.80184	6.91253	7.19293	7.48605	7.35248
205938_at	4.62781	4.67262	4.46015	4.53267	4.60274	4.74633	4.75701	4.812	4.97245	5.06155	5.15427	5.15171	5.12423	5.22096	5.15843	5.16714	5.27974	5.35272
205939_at	5.07078	4.78894	5.0075	4.77837	5.04057	5.152	4.71794	5.20648	5.16512	5.23724	5.23436	5.11335	5.43089	5.42582	5.29932	6.09813	6.19447	6.06805
205991_s_at	6.12464	6.16289	6.4885	6.07987	6.35917	6.1573	6.23709	6.35968	6.47461	6.49016	6.72443	6.74504	7.55816	7.25684	7.38293	7.58645	7.7014	7.67352
206018_at	4.66214	4.55126	4.34775	5.97454	5.84437	6.01538	5.79564	5.85466	5.79856	5.8504	5.70269	5.87771	6.17212	5.84518	5.96814	6.30265	6.28018	6.20979
206025_s_at	4.14084	4.27353	4.15186	4.30737	4.22082	4.22569	4.38158	4.532	4.55739	4.65041	4.6623	4.56464	4.68893	4.89365	4.91512	5.04846	4.7181	4.89018
206039_at	4.56206	4.61283	4.41227	4.6736	4.61663	4.91563	4.86704	5.04531	4.86281	4.97406	5.12344	4.9338	5.01712	5.04762	5.27135	5.41501	5.26267	5.10711
206054_at	4.34622	4.11053	4.21998	3.94246	4.20029	4.02123	4.04161	4.0087	4.01951	4.13968	4.22938	4.11271	4.49054	4.54004	4.2849	5.73865	5.54642	5.53441
206059_at	6.09098	6.27257	6.21518	7.42706	6.95591	6.54811	6.94786	7.40622	7.23102	7.38783	7.41444	7.33732	7.09257	7.31106	7.37807	7.73548	7.63854	7.53188
206067_s_at	4.45757	4.40756	4.46589	4.10138	4.53428	5.02291	4.92576	4.8899	5.16763	5.25168	6.0401	5.64183	6.10999	5.58399	5.64251	5.63377	6.14482	5.60408
206071_s_at	4.35988	4.24363	4.25654	4.26862	4.21947	4.39009	4.32917	4.53699	4.41201	4.57371	4.75184	4.63041	4.78704	4.89275	4.94611	5.12705	5.09016	5.07167
206089_at	5.08807	4.96333	4.79561	5.02762	4.92861	5.15591	5.08718	5.10907	5.24393	5.2091	5.45473	5.39757	5.72657	5.63152	5.55857	5.63869	5.72863	5.58539
206130_s_at	7.16952	6.73951	6.89408	6.50428	7.00853	6.74957	6.64838	6.68863	6.83298	6.73169	6.91036	6.87228	7.35624	7.56133	7.50887	7.85318	7.77656	7.76297
206135_at	3.50148	3.5224	3.57024	3.56457	3.45631	3.49373	3.52725	3.51758	3.61964	3.70441	3.8425	3.93239	4.17608	4.29438	4.4764	4.64103	4.769	5.11534
206140_at	4.32996	4.33093	4.29573	4.97674	5.14076	5.83034	5.3193	5.55732	5.53341	5.47251	5.93094	6.16248	6.40125	6.22164	6.40935	6.76512	7.00861	6.48955
206177_s_at	4.05472	4.15454	4.12306	3.72397	3.8597	3.90575	3.87192	3.89172	3.99268	3.98099	3.96352	3.94001	4.38041	4.86906	4.67845	5.26624	5.26435	5.40713
206201_s_at	3.53356	3.47676	3.45601	3.70962	3.66867	4.05731	4.18852	4.39057	4.25134	4.25963	5.09681	4.84103	4.66319	4.47207	4.60912	4.92052	5.25698	4.5286
206226_at	4.86484	4.54273	4.81111	4.42601	4.82265	4.59925	4.42162	4.75312	4.77356	4.88349	4.86446	4.50841	4.91917	5.15455	4.96541	5.6752	5.75403	5.23897
206282_at	3.84712	3.77549	3.84254	3.62988	3.74548	3.8351	3.73574	3.96104	4.06513	3.98087	4.44351	4.02222	4.28069	4.50388	4.60602	4.59203	4.51518	5.12347
206289_at	5.7272	5.70872	5.63075	6.37254	6.25298	6.45707	6.49239	6.60737	6.49427	6.33113	6.65795	6.53902	6.96617	6.75465	6.70114	6.83797	6.78317	6.73377
206307_s_at	6.219	6.43833	5.81792	7.33598	7.32123	7.74437	8.16765	8.16232	8.60845	8.25423	8.59857	8.43632	8.33526	8.21452	8.2448	8.10627	8.17802	8.08159
206340_at	4.27317	4.15559	4.31694	4.24237	4.25923	4.46793	4.20914	4.44305	4.34234	4.40622	4.6297	4.52594	4.81603	4.69964	4.89424	4.7402	4.99224	4.85459
206372_at	4.65926	4.39803	4.49389	4.40205	4.48249	4.4722	4.32955	4.6094	4.81898	5.05888	5.33265	5.06256	5.07139	4.97824	4.93174	4.78623	4.93517	4.8697
206375_s_at	4.75021	4.48641	4.38635	4.58607	4.60204	4.53567	4.66937	4.77566	4.65232	5.00798	5.00014	4.94366	5.20199	5.24405	5.10119	5.1539	5.29138	5.20247
206403_at	5.20045	5.19349	5.23494	5.27677	5.34135	5.24418	5.33991	5.43758	5.44817	5.51831	5.86601	5.35012	5.72547	5.67829	5.85166	5.98359	5.98905	5.69629
206458_s_at	4.27179	4.1631	4.19451	4.11428	4.25623	4.47745	4.35154	4.43002	4.53008	4.68526	4.71275	4.57461	4.71305	4.55756	4.64927	4.75054	4.62537	4.66116
206488_s_at	5.25454	5.28105	5.02722	4.5914	4.51229	4.80798	4.93429	4.77024	4.77095	5.00767	5.01014	5.6104	5.44867	5.58342	5.3647	5.17965	5.70412	5.48298
206510_at	5.04915	5.18655	5.07714	5.46328	5.0875	5.53597	5.37443	5.43451	5.39701	5.38746	5.40406	5.67167	5.88604	5.81244	5.92289	6.63414	6.08099	6.29606
206527_at	5.38552	5.27216	5.27103	5.40816	5.35027	5.22878	5.41387	5.49577	5.2112	5.46711	5.5611	5.4861	5.74208	6.0495	6.03196	5.97883	5.92587	6.23513
206601_s_at	6.19611	5.87593	6.12998	6.82433	6.75116	7.25169	7.32154	7.36292	7.04766	7.36019	7.39612	7.34297	7.4073	7.07638	7.38926	7.33295	7.11517	7.10558
206602_s_at	4.61833	4.32395	4.35025	4.96493	4.98124	5.05873	5.23056	5.29182	5.2313	5.30343	5.68569	5.25305	5.33303	5.3204	5.07126	5.36729	5.32482	5.24388
206606_at	4.99679	5.2654	5.04741	4.56716	4.65929	4.64653	4.633	4.38101	4.63608	4.93769	4.8527	4.92815	5.31567	5.57213	5.36788	5.89272	6.20459	5.98887
206633_at	4.85071	4.90319	4.63642	4.64503	4.73878	4.69065	4.8309	4.68182	4.93204	5.12056	5.24359	4.9775	5.22859	5.18948	5.46876	5.25974	5.19367	5.26078
206643_at	4.38903	4.12273	4.16131	3.96201	4.06508	3.91547	4.01663	4.13069	4.19063	4.2358	4.31483	3.97633	4.88974	4.77104	4.57409	6.14009	5.57264	5.69672
206647_at	12.0281	11.9761	11.9221	12.2365	11.6503	12.2091	11.9261	11.425	12.4584	12.5219	12.3684	13.2683	13.0643	13.3576	12.8362	13.0933	12.9787	13.0629
206739_at	6.5649	6.56992	6.46856	6.6547	6.54856	6.77536	6.94907	6.9241	6.8826	7.09645	7.14228	7.10936	6.92416	7.1059	7.18291	7.20338	7.16142	7.17494
206743_s_at	5.12897	5.13547	4.92728	4.92239	4.70691	4.90722	4.9412	4.81356	5.04267	4.90329	5.12758	5.05957	5.33571	5.32739	5.52695	5.8829	5.7157	5.70053
206767_at	5.24175	4.80223	5.05133	5.20334	5.17959	5.26792	5.35596	5.40195	5.48952	5.55904	5.60147	5.31406	5.91936	5.9041	5.88297	5.86137	5.68314	5.5644
206805_at	5.99009	6.07797	5.90564	6.18024	6.05785	5.88766	6.21123	6.18787	6.24897	6.21491	6.31215	6.54485	6.57534	6.56855	6.60959	6.83025	6.36346	6.51538
206858_s_at	8.01003	7.89241	7.92237	9.33711	9.14338	9.05445	9.38513	9.25695	9.23644	9.00202	8.7744	8.8878	9.10164	8.83673	8.93625	8.94637	9.08388	9.11185
206874_s_at	5.35185	5.94439	5.81594	6.41185	6.34543	6.09393	6.65861	6.57066	6.6866	6.44134	6.50074	6.48404	6.58962	6.32404	6.69419	6.77512	6.92459	6.40663
206937_at	3.90845	3.77537	3.89428	3.73683	3.84267	3.74119	3.66717	3.66361	3.93076	4.0046	3.91279	4.22085	4.22445	4.36318	4.06051	4.28152	4.31364	4.29801
206940_s_at	4.41626	4.81191	4.71482	4.76602	4.71945	4.7489	5.08347	5.04389	5.34434	5.38933	5.13624	5.21872	5.13481	5.20921	5.50875	5.85692	5.81098	5.60923
206966_s_at	6.53458	6.21123	6.30294	6.26774	6.48875	6.27758	6.40976	6.65193	6.69058	6.55031	6.66496	6.75734	6.97405	6.88083	7.09184	6.87495	6.7928	6.85512
207009_at	4.7871	4.34199	4.48773	4.51469	4.54173	4.76554	4.61416	4.76439	4.99688	5.08109	5.28599	5.24203	5.37487	5.31119	5.44323	5.41623	5.73313	5.76273
207060_at	4.47667	4.32198	4.30306	4.32035	4.372	4.38527	4.24155	4.37755	4.46192	4.53617	4.59667	4.64393	4.65068	4.79226	4.89836	4.99575	4.83662	4.86735
207084_at	4.25477	4.27305	4.16462	4.42799	4.18886	4.89354	4.80225	4.92942	4.77137	4.83566	5.24205	5.33853	5.44295	5.31669	5.29244	5.41001	5.44393	5.23935
207147_at	4.52256	4.65189	4.51362	4.17526	3.99458	4.66287	4.45823	4.57026	4.5756	4.57649	5.04956	4.96034	5.41874	5.06521	5.12444	5.08223	5.17027	4.92514
207148_x_at	3.99048	4.0372	4.02294	4.44473	4.67609	5.09453	5.33356	5.31065	5.19127	5.82289	5.8183	5.40732	5.52083	5.39827	5.43753	5.48921	5.66139	5.49791
207163_s_at	7.27359	7.18488	7.17327	7.51606	7.505	7.75624	7.63062	7.75402	7.61612	7.69808	7.85528	7.67946	7.90202	7.7345	7.78411	8.058	7.98478	8.16858
207373_at	4.40493	3.95928	4.14311	4.10387	4.12762	4.2004	4.44783	4.47433	4.593	4.82964	4.66283	4.57213	5.16626	5.14672	5.13155	5.14309	5.05333	5.51579
207424_at	3.94853	4.00025	3.92605	4.00406	3.87004	4.38602	4.14032	4.28299	4.39899	4.7385	4.97019	4.85318	5.06374	4.78085	4.45691	4.65224	5.2396	4.74697
207443_at	4.59851	4.39049	4.4775	4.36885	4.62476	4.41321	4.39211	4.54309	4.59589	4.48512	4.65886	4.75265	4.82642	4.89797	5.15195	4.93189	5.11424	5.32575
207672_at	3.73575	3.64355	3.71953	4.03703	3.89183	4.0742	4.16855	4.49766	4.14376	4.49958	4.34052	4.35393	4.58137	4.26294	4.52704	4.22835	4.28921	3.99561
207820_at	3.79575	3.92052	3.73195	3.76598	3.76816	3.7993	3.96371	3.79617	3.77686	3.90901	3.83111	3.98732	3.83851	4.11872	4.1847	4.82064	4.7103	5.05435
207824_s_at	5.61063	5.88692	5.71447	6.56056	6.26759	6.58591	6.5714	6.62311	6.52322	6.49421	6.49486	6.30809	6.39056	6.32217	6.50473	6.71746	6.61205	6.63439
207828_s_at	8.43781	8.35282	8.47091	9.29304	9.24877	8.42105	9.39713	9.36129	9.10822	9.23834	9.54385	9.44102	9.33874	9.18473	9.09893	9.32726	9.46318	9.44028
208025_s_at	9.70585	10.0026	9.96885	10.4378	10.1591	10.3866	10.5009	10.4787	10.2244	10.4015	10.3116	10.404	10.6435	10.4226	10.567	10.5939	10.5951	10.6546
208033_s_at	4.92381	4.88163	5.09926	5.30432	5.52221	5.49409	5.59429	5.88238	5.69412	5.6933	5.93285	5.67869	6.19792	6.08917	6.11597	6.62589	6.53519	6.60893
208070_s_at	5.94799	5.97866	5.9556	6.29762	6.1907	5.86443	6.46058	6.33616	6.56833	6.43524	6.43528	6.634	6.80363	6.6169	6.61327	6.54752	6.6429	6.62842
208073_x_at	8.81287	8.51672	8.72223	9.39109	9.66011	8.98907	9.73176	9.6537	9.67831	9.86498	10.162	9.79811	10.1654	9.9967	10.0926	10.4394	10.5224	10.3282
208121_s_at	4.62006	4.52368	4.50416	4.56821	4.47218	4.58665	4.50772	4.72476	4.69786	4.62687	4.71863	4.72909	5.2422	4.90489	5.21946	5.11218	5.13973	5.38923
208178_x_at	6.39892	6.48627	6.39414	6.44461	6.11771	6.46577	6.49705	6.62783	6.6382	6.58298	6.84593	6.74542	6.85415	7.17551	6.99901	7.20843	7.17667	7.32215
208399_s_at	5.35601	5.03295	4.99477	5.26673	5.08678	5.85181	5.71274	5.62084	5.95153	6.01125	6.24865	6.2184	6.32475	6.24018	6.50883	6.55706	6.63825	6.68026
208427_s_at	4.56283	4.49335	4.68023	4.49508	4.35969	4.61172	4.50472	4.73783	4.80756	4.79036	5.06435	5.15029	5.31311	4.95328	5.3956	5.75391	5.31172	5.42917
208443_x_at	4.02843	3.82354	3.98353	3.85565	3.83359	3.92956	3.9207	3.96258	3.86529	3.96892	4.06455	4.17526	4.69744	4.14607	4.57517	4.7065	5.15049	4.86325
208476_s_at	5.3474	5.15759	5.02174	5.26993	5.40132	5.56669	5.69201	5.77159	5.75562	5.57317	5.84308	5.94721	6.23429	5.91428	6.27972	6.36386	6.31022	6.21339
208485_x_at	4.74247	4.79212	4.66854	4.7501	4.74891	4.69521	4.81761	4.93584	5.17754	4.97807	5.21468	5.22876	5.03641	5.37146	5.26938	4.96728	5.20337	5.24526
208497_x_at	4.9284	4.79924	4.5216	4.85206	4.83018	5.05132	4.75836	4.80543	4.84077	4.87872	5.1177	5.12146	5.23661	5.224	5.54841	5.47418	5.27259	5.32688
208557_at	4.69994	4.71561	4.81463	5.03316	5.0745	5.00437	5.75216	5.58011	5.53396	5.57279	5.35991	5.65178	5.90818	5.90705	5.83194	5.70891	5.81072	5.7021
208661_s_at	7.63101	7.56162	7.68349	7.99491	7.94843	7.70261	8.31812	8.40621	8.21656	8.36089	8.28772	8.76982	8.43458	8.62489	8.79565	8.66482	8.85425	8.89119
208662_s_at	7.87785	8.14341	7.86997	8.70462	8.60647	8.23911	8.80836	8.76126	8.75701	8.82497	8.94811	9.17232	9.10369	9.06766	9.28327	9.60939	9.6068	9.38929
208663_s_at	6.75273	6.94477	6.96306	7.44413	7.54468	7.11175	8.07453	7.90846	7.87676	7.67817	7.53346	8.14351	7.91172	8.05264	8.2057	8.1888	8.33558	8.14072
208664_s_at	6.52178	6.45051	6.19683	7.17804	7.21037	6.65771	7.26217	7.43771	7.2781	7.31436	7.40512	7.33001	7.42803	7.39039	7.46392	7.55854	7.91484	7.80289
208682_s_at	8.87037	8.93964	8.87991	8.94972	9.15345	9.24563	9.0376	9.09369	9.03252	9.02656	9.4001	9.2698	9.49245	9.41391	9.47732	9.81887	9.74635	9.74609
208763_s_at	7.23003	7.18328	7.04165	7.37183	7.43713	7.65249	7.57849	7.26228	7.38569	7.66981	7.74784	7.77512	7.89648	7.74898	7.96553	8.29058	8.03404	8.35888
208806_at	5.94093	5.62845	5.78274	5.86043	6.15038	5.9616	6.1309	6.09532	6.11734	6.20951	6.01385	6.31368	6.62691	6.32889	6.49788	6.80589	6.4995	6.82081
208807_s_at	7.07536	7.09654	7.02049	7.16173	7.23116	7.36389	7.27925	7.26928	7.37967	7.33497	7.32664	7.54069	7.65565	7.49485	7.65096	8.05492	7.68977	7.97886
208877_at	6.62716	6.84948	6.50597	7.16312	6.93678	7.18761	7.24378	7.33286	7.24915	7.0318	7.14231	7.42014	7.35995	7.19401	7.72422	7.41106	7.20939	7.35871
208944_at	5.76885	5.6446	5.61105	5.72268	5.74431	6.00144	5.93878	5.82505	5.76037	5.86092	6.01059	6.10153	6.06915	5.95772	6.19686	6.45802	6.67108	6.33739
208978_at	6.30576	6.41476	6.33921	6.57505	6.76309	7.03702	6.7492	6.8756	6.91087	7.07273	7.56234	7.32534	7.39688	7.22493	7.39749	7.57649	7.77821	7.58003
208986_at	8.54068	8.5345	8.55978	8.65115	8.54981	8.755	8.85401	8.85054	8.85808	8.91817	9.02369	9.31333	9.45187	9.28041	9.39066	9.37893	9.5556	9.3348
209012_at	6.26938	6.53338	6.17466	6.61739	6.49061	6.65809	6.37372	6.52404	6.52672	6.19267	6.80933	6.43167	6.85248	6.47474	6.8087	7.28973	7.22471	6.99445
209013_x_at	6.47265	6.37738	6.38362	6.28719	6.2309	6.24325	6.33856	6.66234	6.54423	6.29557	6.60263	6.73509	6.78699	7.01254	6.91087	7.22173	7.06061	6.74402
209050_s_at	6.91041	7.09326	7.01821	7.55144	7.39816	7.6928	7.48055	7.30172	7.54055	7.51297	7.50542	7.68081	7.52358	7.59353	7.77378	8.17853	8.07635	8.02195
209051_s_at	6.19349	6.42354	6.29808	6.82142	6.79482	6.7784	6.76451	7.01955	6.78581	6.90118	7.23537	6.82817	7.05561	7.0676	6.99524	7.34629	7.17596	7.18277
209068_at	7.72929	7.56334	7.56981	7.99655	8.14615	8.04378	8.01045	7.99526	8.01106	8.16326	8.11897	8.23759	8.38087	8.14725	8.37956	8.4751	8.4918	8.42803
209079_x_at	8.16723	8.26955	8.10343	8.66416	8.73865	8.8871	8.85414	9.03054	9.14255	9.17058	9.43751	9.28287	9.35275	9.37043	9.33521	9.53426	9.71065	9.59416
209087_x_at	5.62817	5.64167	5.87917	6.15736	5.87315	6.02328	6.13745	6.15202	6.06847	6.04779	5.96932	6.14666	6.55798	6.27404	6.22067	6.51172	6.25805	6.56749
209094_at	7.94796	8.01229	7.99737	7.93557	7.65097	8.11728	8.13946	7.91977	8.06629	8.28926	8.36093	8.28557	8.5977	8.10529	8.40509	8.52932	8.75351	8.57668
209112_at	7.52859	7.75899	7.54256	7.80831	7.78788	8.29131	8.46794	8.08684	8.04068	8.1304	8.19203	8.20694	8.33173	8.06665	8.1837	8.02631	8.24217	8.04679
209118_s_at	11.7264	11.6577	11.6618	11.7307	11.5985	11.9204	11.6155	11.8401	11.5653	11.7759	12.1529	12.0451	12.3066	12.1217	12.3399	12.5248	12.5439	12.302
209119_x_at	4.98442	5.22267	4.79172	5.62794	5.41497	5.97503	6.08786	6.32361	6.05151	6.25915	6.06227	6.51344	6.3624	6.05289	6.19708	6.65927	6.39137	6.16011
209120_at	6.26098	6.39002	6.12391	8.36976	8.01256	8.6268	9.12079	9.22765	8.83648	9.06733	9.02086	9.15835	9.63204	8.80804	9.31296	9.00612	9.02593	9.1581
209121_x_at	7.13669	6.98811	7.05065	8.49176	8.75058	9.00149	9.34525	9.56781	9.36146	9.27985	9.41761	9.49418	9.82719	9.47009	9.60563	9.70062	9.6093	9.62177
209148_at	5.83924	6.02615	6.0534	6.36528	6.45026	6.40787	6.45465	6.50423	6.6562	6.5182	6.58374	6.60653	6.6271	6.6206	6.77535	6.79292	6.9366	6.8539
209159_s_at	5.55894	5.58851	5.47678	5.638	5.941	5.82626	5.93776	6.01202	5.93267	5.96098	6.26113	6.09947	6.27303	6.1107	6.21025	6.43647	6.5618	6.54963
209167_at	6.1299	6.46133	6.44526	6.74987	6.32584	6.82387	6.78066	6.84679	6.93308	6.79798	6.71047	6.97365	7.0233	6.82314	6.7335	7.00871	7.26302	7.15844
209172_s_at	5.34087	5.3228	5.31471	6.22106	6.02195	5.33083	6.22601	6.18593	5.91179	6.08449	6.38272	6.49549	6.21987	6.03789	6.18213	6.28881	6.27437	6.39961
209197_at	5.12505	5.37396	5.17862	5.62304	5.75731	5.95893	5.80452	5.8657	5.84833	5.75919	6.1694	5.89688	6.33098	6.51373	6.3946	6.67657	6.75741	6.70783
209198_s_at	3.77117	3.88582	3.90228	4.02536	3.97368	4.26723	3.99338	4.1124	4.12334	4.24811	4.50668	4.20533	4.64036	4.70038	4.69894	5.20169	5.31074	5.38766
209200_at	5.55581	5.75297	5.72381	6.19797	5.94494	6.22269	6.10476	6.08995	5.98132	6.19717	6.35509	6.25279	6.37499	6.32186	6.44864	6.56824	6.72587	6.38062
209234_at	7.43405	7.55648	7.65394	7.70157	7.32133	7.89642	7.63721	7.75201	7.76539	7.69338	7.65557	7.76451	8.00281	7.96831	8.03739	8.4673	8.0613	8.45039
209285_s_at	6.17925	5.90413	6.18926	6.5296	6.30089	6.18048	6.55831	6.5118	6.54344	6.47751	6.93822	6.71543	7.08275	6.56868	6.85863	6.95082	7.03681	7.12513
209318_x_at	6.76684	6.95529	6.80156	7.39377	7.56397	7.54025	7.98929	7.90423	7.99582	7.87941	7.85435	7.87848	8.05328	7.63531	7.6822	7.59769	7.64297	7.29052
209355_s_at	6.75447	6.83971	6.83267	7.13686	6.72476	7.2167	7.11678	6.98239	7.15637	7.086	6.92564	7.52685	7.31989	7.20248	7.40956	7.62865	7.48876	7.52733
209361_s_at	7.32331	7.35723	7.2474	7.6913	7.85523	7.87663	7.66322	7.84003	7.60104	7.57144	7.89818	7.84209	8.10046	8.04277	8.03857	8.28711	8.4624	8.33895
209372_x_at	9.55672	9.45846	9.57633	9.09495	9.0186	9.36227	9.12482	8.90124	8.83958	8.99026	9.36697	9.32108	9.63604	9.487	9.66018	10.0282	10.1083	9.96012
209458_x_at	11.9579	11.6232	11.7487	11.9083	11.4276	11.8483	11.3858	11.2364	12.0324	12.4869	12.5103	13.4183	13.2311	13.3591	12.7623	13.1888	13.261	13.2768
209462_at	5.93017	5.57331	5.88785	6.23653	6.33593	6.64656	6.548	6.56884	6.57561	6.6056	7.0215	7.00817	7.30562	7.1521	7.11227	7.57558	7.44761	7.58413
209466_x_at	8.12245	8.15584	8.04389	8.40673	8.36704	8.56472	8.56176	8.54464	8.40936	8.30941	8.16246	8.62107	8.47209	8.62561	8.76798	9.18607	9.01769	9.23766
209470_s_at	4.38695	4.33207	4.46031	4.41347	4.27184	4.87608	4.51805	4.57078	4.57743	4.99054	5.10827	4.94539	5.32557	5.41754	5.65647	6.2311	6.25294	6.23516
209496_at	6.28439	6.19939	6.22728	5.4767	5.78172	5.79377	5.4091	5.85536	5.96809	6.34206	6.53728	6.30587	6.75964	6.61368	6.77026	6.96408	6.64298	6.94527
209505_at	5.01657	4.85715	5.00723	7.55233	7.43673	8.50291	8.66402	8.63525	8.65995	8.98125	9.14106	9.45521	9.7606	9.02774	9.63301	9.41706	9.56207	9.63538
209506_s_at	5.42563	5.51512	5.22737	6.20848	6.54381	6.76319	7.01142	7.00972	7.01783	7.04156	7.71762	7.67248	7.84791	7.62134	7.80015	8.04059	8.14413	7.96255
209541_at	4.05511	3.6978	3.88862	3.80368	3.90118	4.02613	3.78283	3.81931	3.96401	3.95355	4.07148	3.94633	4.30773	4.09826	4.27074	4.49507	4.52672	4.31058
209550_at	8.01827	8.08238	8.17973	8.34914	8.24746	8.62386	8.35774	8.40637	8.38326	8.46961	8.54559	8.68706	8.6563	8.57695	8.65238	9.11001	8.97125	9.01578
209560_s_at	8.63251	8.30338	8.48578	9.91444	9.81132	10.0958	10.0217	10.0902	10.0595	9.97772	9.94908	10.2703	10.359	10.282	10.456	10.5802	10.807	10.8187
209568_s_at	7.08542	7.09488	7.11729	7.10934	7.04268	7.24616	7.09314	7.15894	7.15572	7.11354	7.45967	7.42018	7.69334	7.55639	7.75933	7.68183	7.78698	7.59118
209582_s_at	6.11269	6.08339	6.02017	5.55963	5.79489	6.21277	6.02816	5.99323	5.67133	5.91586	6.32201	6.33625	6.35845	6.25853	6.32032	6.64843	6.67725	6.62198
209583_s_at	7.08008	7.10946	7.24079	7.01084	6.93481	7.29076	7.24923	7.26732	7.11573	7.03789	7.23983	7.44597	7.63693	7.49422	7.57209	7.84538	7.94745	7.89978
209590_at	6.30775	6.10479	6.06183	6.42652	6.55349	6.72981	6.58591	6.75456	7.02804	7.10973	7.12019	7.01531	6.91524	7.02099	6.86604	6.8203	6.84706	6.87441
209591_s_at	5.35511	5.41086	5.2812	5.76339	5.64412	5.99539	5.94406	6.00258	6.29584	6.09328	6.07811	6.28835	5.99344	6.06802	6.23495	6.13958	5.89376	5.94465
209596_at	6.81344	6.58033	6.61398	5.9827	6.2403	6.31728	6.24414	6.33367	6.3113	6.65404	7.07373	7.03808	7.2809	7.24391	7.44067	7.46815	7.91082	7.7795
209598_at	5.78377	6.02053	5.93302	6.42702	5.78705	6.43679	6.14125	5.88789	5.92383	6.55277	6.56673	6.5364	6.72988	6.79216	6.91187	6.92514	7.10365	6.99603
209610_s_at	4.54172	4.31521	4.21038	4.23038	4.40285	4.44093	4.5433	4.37588	4.60206	4.51549	4.64824	4.61528	4.67888	4.92894	4.8378	5.01547	4.8501	4.95813
209617_s_at	4.64929	4.7485	4.41716	4.83367	4.61226	5.03748	4.80032	4.91792	4.90409	4.83362	4.7386	5.27056	5.26327	5.22776	5.26171	5.4127	5.56516	5.42741
209621_s_at	5.23228	5.1269	5.01954	5.04735	5.35179	5.46877	5.38633	5.26037	5.25541	5.73234	5.9416	5.83438	5.94574	5.76888	5.71915	6.13795	6.07423	6.06254
209651_at	4.66723	4.36986	4.36765	4.2949	4.21475	4.35747	4.36511	4.24307	4.42342	4.50682	4.38453	4.33092	4.45505	4.60182	4.92797	4.91742	4.68027	4.83202
209687_at	7.19571	7.35723	7.13204	7.22352	6.78517	7.2639	7.04567	7.04616	7.16061	6.7858	7.40139	7.33374	7.98094	7.57785	8.03666	8.61098	8.40768	8.31311
209688_s_at	5.2515	5.4409	5.47711	5.80844	5.86618	5.65266	5.97216	5.84853	5.84194	5.83254	5.90703	5.79676	5.97764	5.88949	5.89828	6.19014	6.4978	6.06505
209692_at	5.24608	5.12303	5.13272	5.32643	5.38869	5.49339	5.24126	5.58473	5.62955	5.51593	5.75235	5.67305	5.74586	5.9379	5.80606	5.89372	5.97219	5.82667
209708_at	6.43375	6.27682	6.20662	6.11898	6.38874	6.55571	6.54887	6.48375	6.68966	6.83258	7.3399	7.20215	7.50538	7.36872	7.45332	7.91739	7.8388	7.7904
209711_at	6.203	6.0075	6.19577	5.62642	5.67683	5.49505	6.00549	5.92473	6.12975	6.08544	6.43639	6.18711	6.58699	6.30507	6.17946	6.72177	6.99405	6.49879
209737_at	4.38367	4.47937	4.40408	4.49488	4.3925	4.78749	4.71973	4.69702	4.59589	4.72402	4.83385	4.8705	5.02715	5.01336	5.12177	5.27	5.48418	5.43181
209760_at	5.87232	5.81026	5.84942	5.99798	6.00466	6.08121	6.15031	6.24332	6.08041	6.52693	6.39659	6.50371	6.86392	6.4829	6.73834	6.91232	6.97029	7.00684
209794_at	6.66409	6.51535	6.41213	6.53705	6.65993	6.78713	6.70077	6.98321	7.00834	7.18559	7.37615	7.13256	7.54043	7.47562	7.51898	7.70346	7.85184	7.7068
209841_s_at	5.68333	5.53991	6.0269	5.81442	6.15414	5.81301	6.1524	6.1592	6.34614	6.47652	6.85293	6.60114	6.93726	6.97183	6.80845	7.01491	7.22223	7.25151
209842_at	5.42472	5.25947	5.34757	5.42099	5.52827	5.99231	6.12156	6.41445	6.25258	6.11786	6.32776	6.25332	6.19421	6.25446	6.52124	6.28686	6.24157	6.48149
209863_s_at	4.38677	4.27111	4.39306	4.72429	4.90937	4.7576	5.17293	5.16038	5.17333	5.06272	5.19776	5.18053	5.01553	5.19958	5.08126	5.19907	4.85831	4.76126
209866_s_at	5.49314	5.76356	5.61683	5.9725	5.96843	6.04865	6.0116	5.83398	6.08731	6.04404	6.17128	6.19922	6.3805	6.3825	6.38658	6.72049	6.65159	6.5987
209867_s_at	6.45375	6.50288	6.37343	6.85807	6.58076	6.70382	6.5638	6.74674	6.94193	6.60815	6.8021	6.87682	6.90915	7.01893	7.08371	7.19629	7.28518	7.24993
209871_s_at	6.60952	6.47319	6.67675	7.17157	6.97764	7.23999	7.12974	7.29048	7.21338	7.37846	7.47094	7.44196	7.57625	7.41269	7.7003	7.82777	8.00406	7.8741
209877_at	5.02004	5.12918	5.00032	5.17016	5.29818	5.29127	5.30219	5.39281	5.2085	5.37053	5.65207	5.59519	5.87637	5.68414	5.90568	5.87888	5.92302	5.69375
209899_s_at	9.09017	9.0467	8.88474	9.34637	9.44881	9.4356	9.38574	9.46697	9.42026	9.46754	9.60321	9.56362	9.61283	9.52143	9.60264	9.74888	9.84659	9.81234
209905_at	6.06622	5.87652	6.02559	7.08386	7.08921	7.06012	7.30932	7.23079	7.10253	6.93268	7.12921	7.2764	7.85958	7.31053	7.65005	7.87631	7.97017	7.63342
209937_at	5.25184	5.16842	5.18892	4.99282	5.15049	5.34234	5.24439	5.42086	5.43445	5.58843	5.51146	5.53728	6.18069	5.76338	5.9882	5.99065	6.10049	5.85797
209957_s_at	5.5114	5.5377	5.20083	8.14687	8.25656	8.1617	7.74266	7.79124	7.98879	7.83159	8.0113	7.73909	7.71455	7.65758	7.59284	7.67557	7.53472	7.62742
209960_at	3.91099	3.74762	4.0195	3.50471	3.45235	3.7301	4.0665	3.83003	4.03091	4.28423	4.49559	4.38161	4.97259	4.73195	4.89088	4.64651	4.61074	4.38862
209977_at	6.31953	6.49199	6.38334	5.28535	5.59833	5.41716	5.41465	5.50513	5.68777	5.56626	5.25297	5.66502	6.45004	6.28296	6.45571	6.98496	7.54413	6.96646
209978_s_at	6.41548	6.50098	6.57139	5.74053	5.77952	5.80217	5.97219	5.76323	6.04573	6.06299	5.89953	5.93689	6.5601	6.68847	6.80621	7.09543	7.32829	7.31729
210015_s_at	5.17771	5.09167	5.1087	5.33443	5.33731	5.468	5.29501	5.49	5.64351	5.57317	5.72713	5.41114	5.71569	5.84797	6.0487	6.28236	6.31909	5.94277
210049_at	5.20153	5.18381	5.30392	4.53708	4.68382	4.56251	4.69087	4.69496	4.68982	4.81607	4.59542	4.67079	5.31205	5.27773	5.28535	6.36118	6.95779	6.42817
210073_at	3.47709	3.78563	3.59362	3.64612	3.57183	3.86222	3.92752	3.93562	3.78097	3.82049	3.75745	3.9173	4.07959	3.8067	4.1469	4.42062	4.266	4.11609
210138_at	4.22541	4.37446	4.17661	4.32416	4.33634	4.56375	4.70327	4.65109	4.70648	5.07806	4.84465	4.73553	4.84575	4.92104	4.89329	4.86299	4.81782	4.72173
210198_s_at	6.22553	5.93776	6.27487	6.12141	6.02615	6.51054	6.41176	6.40387	6.55659	6.54434	6.92979	7.1862	7.01405	7.15051	7.2047	7.44975	7.53582	7.34174
210251_s_at	4.87018	4.91093	4.97621	5.07754	4.98397	5.13899	5.0434	4.89466	5.03552	4.89335	5.07114	5.39997	5.55987	5.58946	5.58256	5.94328	5.94542	5.80069
210296_s_at	6.89238	7.15529	6.8584	7.18802	6.95316	7.4007	7.38617	7.19302	7.16238	7.33882	7.3566	7.62225	7.60669	7.398	7.53669	7.76242	7.69928	7.66628
210303_at	4.29627	4.30716	4.38298	4.32034	4.47046	4.55915	4.55136	4.54205	4.60971	4.54097	4.83128	4.69021	5.25349	4.65135	4.98083	6.04237	5.91391	5.98125
210347_s_at	6.02752	5.93547	5.95934	5.47984	5.86354	5.83255	5.81005	5.81611	6.05264	6.10423	5.99488	6.12813	6.48371	6.66572	6.98204	7.25951	6.73737	6.80088
210432_s_at	3.85966	3.57945	3.82643	3.76579	3.85415	3.82394	3.72514	3.87957	4.00761	4.0687	4.07522	4.05986	4.39614	4.49554	4.46063	5.53781	5.35108	5.25196
210508_s_at	6.7568	6.93473	6.66127	7.2881	7.22709	7.38805	7.2704	7.30952	7.18699	7.30657	7.49762	7.47479	7.32518	7.4205	7.44586	7.48115	7.50009	7.35631
210645_s_at	6.94086	7.88188	7.83855	8.69716	8.6792	8.20108	9.09072	9.01002	8.8883	8.88673	8.79047	8.98557	9.38431	8.98104	9.35907	9.50177	9.36568	9.2411
210746_s_at	5.6787	5.66314	5.47442	5.41501	5.38469	5.56861	5.48744	5.51362	5.51144	5.96704	5.8235	6.37984	6.30574	6.48678	6.01028	6.72297	6.35775	6.38159
210794_s_at	6.92152	6.93871	6.9117	6.97171	7.3733	6.90777	6.94246	6.74296	6.93825	6.8944	6.93665	7.08427	7.80318	7.59259	7.57828	8.06573	8.08155	7.94795
210869_s_at	5.1199	5.13785	5.07036	5.28001	5.36412	5.17008	5.07999	5.36866	5.54116	5.34592	5.57717	5.55054	5.58215	5.75825	5.71213	5.78538	5.72901	5.6196
210875_s_at	3.17556	3.40946	3.41062	3.79655	3.4624	3.51415	3.9653	3.88873	4.04016	3.93686	3.95967	3.95338	4.44618	4.00471	4.60574	4.82064	4.22978	4.67773
210881_s_at	6.77419	6.27763	6.33685	7.23703	7.43379	7.42468	7.56333	7.46484	7.21628	7.20004	7.21877	7.32486	7.50509	7.58305	7.57466	7.88911	7.82914	8.0195
210882_s_at	6.25746	6.57867	6.57398	6.65192	6.49875	6.72188	6.68403	6.71347	6.54919	6.47997	6.54217	6.72294	6.94611	6.57024	6.92369	7.15766	7.25178	7.02996
210888_s_at	5.91225	5.62363	5.57749	5.63061	5.7083	5.56818	5.6199	5.78755	5.77822	5.91171	5.85923	5.82401	6.06896	6.17684	6.25134	7.11252	7.21589	7.10262
210962_s_at	5.73013	5.34481	5.74467	6.28631	6.16354	5.42049	6.53239	6.27881	6.14348	6.46565	6.56158	6.44455	6.6982	6.36354	6.36338	6.81339	6.71488	6.70148
211031_s_at	5.03427	5.26758	5.28163	5.24173	5.30493	5.32159	5.23038	5.36187	5.12725	5.23605	5.5298	5.60311	5.91056	5.59174	5.63684	5.98196	6.0146	6.23811
211066_x_at	8.08084	8.02578	8.11177	8.61735	8.64624	8.83168	8.84495	8.9899	9.0671	9.12549	9.26904	9.19015	9.30847	9.33413	9.35355	9.43159	9.67763	9.64502
211071_s_at	9.0485	9.03825	9.04075	9.15478	9.27022	9.3957	9.26165	9.36423	9.19732	9.27257	9.61496	9.43687	9.87811	9.80256	10.0237	10.2732	10.5191	10.2841
211219_s_at	4.32976	4.51593	4.35905	4.69283	4.56322	4.8203	4.73234	4.87183	4.82538	4.85962	4.98103	5.09932	5.01564	5.18045	5.4353	5.14072	4.98448	5.31476
211302_s_at	5.18959	5.19632	5.0676	5.21297	5.13399	5.29369	5.47437	5.65235	5.49197	5.6007	5.65399	5.56814	5.99397	5.7355	5.60902	5.97577	5.76282	5.7764
211341_at	3.82482	3.87994	3.96134	3.87168	4.02545	4.09337	4.44804	4.39488	4.49728	4.32203	4.80158	4.63684	4.83843	4.7827	4.97941	5.15566	5.33971	5.19938
211357_s_at	3.53973	3.41026	3.4153	3.34261	3.42598	3.48678	3.44321	3.52857	3.40988	3.57308	3.43014	3.48898	3.96291	3.83908	4.10284	5.20001	5.41612	5.3588
211358_s_at	5.01507	5.02355	4.94818	5.43762	5.46217	5.56911	5.48441	5.48939	5.64136	5.42726	5.52304	5.59572	5.56175	5.51975	5.48769	5.65432	5.76701	5.52187
211467_s_at	5.39125	4.9731	5.24074	4.94352	5.13483	5.15669	5.15738	5.36332	5.2791	5.43361	5.64222	5.61416	5.59002	5.83411	6.03696	5.7923	5.79826	6.08166
211564_s_at	5.16451	5.45052	5.25984	5.74376	5.83578	5.94715	6.00605	5.69114	6.30342	6.15823	6.21038	6.27848	5.96765	6.02558	5.91203	6.1235	6.27599	6.11619
211580_s_at	5.01551	4.90851	5.02634	4.98995	5.19558	5.14062	5.06308	5.20501	4.89907	5.30717	5.89069	5.343	5.36923	5.59056	5.53945	5.98915	5.57475	5.56369
211671_s_at	5.49239	5.59281	5.54282	4.99188	5.18051	5.23543	5.31733	5.20642	5.32988	5.46588	5.63387	5.61022	5.79968	5.61646	5.63664	6.11978	6.18801	5.85323
211685_s_at	5.4398	5.40909	5.2138	6.35564	6.5591	7.08945	6.93519	6.9499	6.71451	7.17741	7.17916	7.50702	7.65304	7.35724	7.52522	7.72861	7.72964	7.74678
211699_x_at	11.3862	11.3874	11.3285	11.8865	11.252	11.7678	11.3925	10.9838	12.0247	12.0206	11.9684	13.4581	12.9565	13.3229	12.6344	12.8148	12.8544	12.7694
211700_s_at	7.96192	7.88712	7.90934	8.02906	8.05835	8.20259	8.21729	8.21734	8.27869	8.19859	8.33342	8.39862	8.51703	8.32383	8.4485	8.73915	8.84121	8.6914
211737_x_at	8.20266	8.21146	8.13116	8.49233	8.51928	8.72408	8.87738	8.5916	8.66969	8.32881	8.34947	8.83594	8.53683	8.93595	8.91187	9.14989	9.11553	9.12121
211745_x_at	11.6854	11.546	11.6338	11.9721	11.4087	11.8742	11.4974	11.1392	12.0877	12.1711	12.319	13.2432	13.0775	13.304	12.7169	12.9786	13.032	13.0296
211825_s_at	5.77381	5.70143	5.64728	5.70437	5.88213	5.93452	5.73461	5.88029	6.12711	6.03662	6.13027	6.17661	6.58113	6.60771	6.52864	6.58333	6.36786	6.48736
211843_x_at	4.19544	4.11253	4.13272	4.09746	4.03631	4.02263	4.17471	4.09467	4.12194	4.27191	4.29944	4.11948	4.50512	4.52166	4.34394	5.58546	5.3444	4.82303
211876_x_at	5.21275	5.42646	5.35237	5.88619	5.54983	6.22269	5.92342	6.17307	6.3077	6.05643	6.43527	6.56397	6.70634	6.4063	6.46656	6.65471	6.58783	6.59499
211922_s_at	6.82048	6.72108	6.7696	6.69727	6.35276	6.57217	6.60667	6.30348	6.55466	6.57255	6.6314	6.88161	6.92315	7.0213	6.94815	7.2051	7.31996	7.38611
211929_at	7.53473	8.12545	8.20794	8.46033	8.3781	8.42927	8.72357	8.63939	8.58638	8.48767	8.69359	8.76244	9.09511	8.30591	9.05477	9.06384	9.09406	8.85916
211930_at	7.66744	7.45574	7.5761	7.90652	8.0361	7.68047	8.08399	8.11553	8.10929	8.15088	8.31651	8.33319	8.21673	8.38234	8.5299	8.29021	8.43945	8.49106
211958_at	5.95514	6.16193	6.08362	6.45044	6.43551	6.74821	6.84994	7.19988	6.92388	6.78018	7.05206	7.069	6.90497	6.63501	7.11448	7.40094	7.21684	7.24479
211959_at	6.91444	7.00112	7.25505	7.91511	7.74438	8.38182	8.54339	8.48366	8.51994	8.26285	8.43632	8.60224	8.64718	8.31692	8.68705	9.08329	8.77967	9.02824
211976_at	7.86809	7.71661	7.77679	7.63487	7.8882	7.81168	7.6518	7.93937	7.7854	8.02075	8.35329	7.88974	8.29705	8.21811	8.33739	8.43188	8.61157	8.54493
211984_at	7.88592	7.72599	7.86687	7.77022	7.7248	7.85754	7.85727	7.77836	7.48227	7.39763	7.7222	7.93473	8.03459	7.97706	8.11527	8.26214	8.49786	8.50792
211985_s_at	6.93515	7.0297	6.9845	6.70785	6.73196	7.08268	6.90281	6.75409	6.35693	6.30867	6.94708	7.10582	7.25294	7.06629	7.26344	7.64273	7.90606	7.67552
212017_at	8.32777	8.17361	8.39714	8.70177	8.62276	8.90786	8.7842	8.97338	8.7932	9.00545	9.23731	9.10869	9.27421	8.96918	9.18813	9.23177	9.37417	9.33618
212020_s_at	7.64019	7.34136	7.65265	7.86865	7.95462	7.52835	7.93033	8.14576	7.82449	7.70503	8.30511	7.97032	8.26326	8.08689	8.11409	8.19261	8.24605	8.25659
212021_s_at	7.47365	7.41663	7.50165	7.82015	7.94632	7.60468	7.82327	8.13648	7.86926	7.58866	8.192	7.89879	8.32933	8.00246	7.921	8.23261	8.25877	8.03342
212022_s_at	7.02809	7.1435	7.02326	7.63687	7.70249	7.11868	7.60693	7.89789	7.35294	7.45621	7.89059	7.72322	8.12914	7.93112	7.6724	7.93499	7.7844	7.81519
212023_s_at	6.05123	5.98131	5.90188	6.46482	6.39729	6.04579	6.59079	6.31688	6.27311	6.35127	6.34951	6.72466	6.81746	6.44911	6.6662	6.69403	6.77585	6.93531
212070_at	5.45103	5.29398	5.4194	5.60587	5.4846	5.62752	5.46303	5.65417	5.58577	5.59599	5.72346	5.68822	6.30856	5.9554	6.03239	6.61761	6.72079	6.33731
212092_at	7.77848	7.83124	7.78488	8.28051	8.3497	8.63474	8.74396	8.69365	8.62229	8.73794	8.97438	8.99741	9.13211	8.81902	8.92883	9.20097	9.22038	9.162
212094_at	8.62471	8.46397	8.57335	9.23621	9.08701	9.43027	9.57018	9.44365	9.2352	9.49237	9.42879	9.79001	9.41806	9.43144	9.735	9.86124	9.8227	9.97129
212096_s_at	5.44009	5.4074	5.67162	5.42985	5.6908	5.74034	5.98798	5.89409	5.90183	5.9097	6.03417	6.29576	6.67744	6.45022	6.683	6.53534	6.86245	6.474
212162_at	5.93199	6.18396	6.34257	6.45752	6.57931	6.24783	6.50803	6.62974	6.5657	6.57719	6.82175	6.55269	6.92117	6.73213	6.68657	7.02846	7.07366	6.78509
212163_at	7.53658	7.67268	7.70695	7.84339	7.8973	7.63555	8.07335	7.92469	8.07781	8.0517	7.84288	8.04706	8.56026	8.21063	8.10755	8.45885	8.6432	8.58263
212176_at	7.67007	7.70499	7.72298	8.1844	8.28919	7.70006	8.41705	8.39903	8.32271	8.07558	8.31616	8.42665	8.64352	8.32032	8.38672	8.26307	8.30858	8.1096
212179_at	6.91067	7.2897	7.13666	7.8208	7.55074	7.00824	7.57191	7.5654	7.71854	7.57213	7.74458	7.60146	8.29315	7.61115	7.90311	8.1226	7.98067	7.91322
212188_at	7.18366	7.15889	7.00754	6.53112	6.26393	6.61605	6.78405	6.42853	6.57032	6.54023	6.31282	6.78052	6.84194	6.82752	7.22282	7.47215	7.47729	7.89529
212192_at	6.71726	6.90532	7.1498	6.79069	6.23535	6.7344	6.7252	6.3781	6.33093	6.10685	6.57581	6.61064	7.19335	6.82078	7.24418	7.90917	7.92479	7.83431
212205_at	8.33111	8.48046	8.45618	8.69487	8.46953	8.72023	8.85485	8.79585	8.66402	8.54651	8.85363	8.98567	9.03417	8.70029	9.141	9.2093	9.22893	9.09071
212226_s_at	8.23625	8.39199	8.27552	8.49136	8.20563	8.59808	8.54373	8.40843	8.64952	8.59968	8.40231	8.98993	8.94548	8.83033	8.95044	9.1485	9.10328	8.97219
212233_at	8.02761	8.1407	8.19357	8.55192	8.45677	8.54484	8.64581	8.6309	8.58544	8.71807	9.0034	9.04981	9.25592	9.22458	9.22413	9.51547	9.54278	9.59943
212248_at	5.28787	5.8355	5.56899	5.57543	5.25848	5.57414	5.6329	5.67886	5.60662	5.33809	5.74761	5.72465	5.89748	6.00483	6.00254	6.39475	6.77637	6.14271
212277_at	6.59197	6.92817	6.67664	6.97209	6.81779	7.21539	7.20822	7.25514	7.10877	7.18445	7.34957	7.37722	7.59755	7.28447	7.48134	7.15738	7.52033	7.5001
212294_at	6.74875	7.31232	7.16965	7.5408	7.45641	7.7324	7.83961	7.78957	7.60972	7.87845	7.85931	7.86742	7.99852	7.90473	7.8817	8.10438	7.87674	7.80561
212325_at	5.07227	5.31444	5.46067	5.10527	4.5321	5.4555	5.31859	5.12997	5.36874	5.41645	6.21665	5.63827	6.57867	6.03855	6.06822	6.39449	6.90025	6.11171
212344_at	6.04623	5.6432	6.08282	6.67755	6.70618	6.8113	7.16859	7.27778	7.29897	7.23442	7.63801	7.26652	7.33896	7.10361	7.29234	7.62876	7.68731	7.41237
212353_at	5.17283	5.4503	5.13272	5.94649	5.67917	6.14417	6.57386	6.71853	6.74682	6.8594	6.95371	6.77982	6.97156	7.08467	6.73671	7.229	6.97738	7.0824
212354_at	6.28034	6.43615	6.7369	7.41276	7.35997	7.49236	8.02175	7.93666	7.93774	7.7216	8.04836	8.05075	8.01532	7.8704	7.8893	8.32619	8.24471	8.21134
212368_at	7.15895	7.34253	7.17374	8.07638	7.92701	7.16127	8.3119	8.03133	8.17107	7.86901	7.93097	8.15148	8.23536	7.73453	7.91469	8.00704	7.97823	7.81874
212413_at	4.36479	4.33137	4.13027	4.39084	4.55151	4.69797	4.72254	4.63324	4.91503	5.0237	5.04506	4.97953	5.04279	5.11411	5.18772	5.04846	5.35769	5.35275
212414_s_at	6.00274	6.05164	6.07225	6.79075	6.6515	7.37521	7.41483	7.47184	7.84305	8.08489	8.11607	7.91845	8.26037	8.20845	8.20228	8.43866	8.46109	8.32619
212419_at	7.34779	7.44684	7.46106	7.42545	7.62388	7.72028	7.37487	7.48102	7.68108	7.47234	7.90144	7.58047	7.94757	7.75536	7.88085	7.95478	8.17102	8.04528
212470_at	6.40785	6.5792	6.67233	6.23604	5.84917	6.33967	6.41641	6.44641	6.52077	6.53328	6.63528	6.57225	6.68422	6.77972	6.82583	7.03185	6.91119	6.85632
212535_at	6.33617	6.56541	6.46938	6.78868	6.6996	6.69141	6.73674	6.82194	6.87072	6.86638	7.18911	6.94935	7.08021	6.85096	7.0517	7.00131	7.29085	7.08073
212595_s_at	7.00624	7.00595	6.83446	7.158	7.05567	7.41506	7.21679	7.30704	7.31846	7.64071	7.5603	7.57003	7.83281	7.69171	7.77332	7.98004	7.97446	7.71651
212599_at	8.62639	8.66366	8.66399	8.68912	8.62971	8.7646	8.72556	8.8739	8.63335	8.56043	9.06361	9.00307	9.44099	9.02748	9.19256	9.51689	9.59762	9.57254
212605_s_at	4.92838	5.04416	5.34002	5.20202	5.24021	5.72466	5.42591	5.38541	5.53499	5.41236	5.87952	5.92095	6.37252	5.92985	6.25816	6.38024	6.17979	6.335
212607_at	6.79972	6.80529	6.62901	6.93849	6.7739	6.81349	7.04201	7.02276	7.21295	7.27721	7.21052	7.21271	7.4577	7.55743	7.40903	7.54899	7.64428	7.57245
212608_s_at	7.69956	7.70764	7.78789	7.49961	7.75118	7.81783	7.73857	7.82478	7.911	7.80824	8.17345	8.15744	8.31751	8.11525	8.3748	8.42998	8.73804	8.61747
212609_s_at	4.96469	4.94051	4.99892	5.11405	5.20362	5.31927	5.35988	5.29375	5.39205	5.6671	5.74819	5.67058	5.8064	5.77709	5.90387	6.12348	6.11766	6.10908
212611_at	7.42903	7.40542	7.64392	7.72683	7.78374	8.1272	8.02528	8.03412	8.37873	8.30967	8.49442	8.65148	8.64248	8.79201	8.51094	8.80601	8.80284	8.61077
212616_at	6.82631	6.88052	6.98181	7.55989	7.3792	7.09711	7.53541	7.46521	7.52811	7.03754	7.68313	7.58415	7.53774	7.52646	7.53605	7.84432	7.85751	7.56056
212636_at	6.66034	6.76198	6.65832	6.96653	6.51352	6.88306	7.01803	6.68452	6.68725	6.97005	6.8995	7.2462	7.25393	7.07854	7.24235	7.51328	7.3136	7.26738
212654_at	5.90642	5.62024	5.61452	6.41284	6.57185	6.49806	6.30535	6.38097	6.23691	6.47171	6.56511	6.66332	6.70401	6.61994	6.66866	6.61431	7.0019	6.91942
212690_at	6.61652	6.56633	6.46335	6.86948	6.81738	7.11516	7.10581	7.02712	6.95896	6.94776	7.19036	7.30857	7.30588	7.1023	7.35872	7.36578	7.63717	7.3756
212713_at	6.12684	6.06605	6.0897	6.02411	5.94186	6.14688	5.97071	6.1892	6.21966	6.11517	6.39312	6.23156	6.59045	6.53344	6.59926	7.35028	7.30186	7.05539
212724_at	8.24178	8.21216	8.17031	8.24921	8.33666	8.06509	8.36226	8.33251	8.4114	8.56171	8.6904	8.60224	9.13268	8.84687	9.10577	9.47444	9.55612	9.49265
212726_at	5.63894	5.41022	5.56225	5.55685	5.69386	5.76842	5.80641	6.00885	5.83168	5.86735	6.16487	6.22664	6.57015	6.24928	6.36551	6.28631	6.64757	6.51507
212732_at	3.79259	3.99762	3.93796	4.02009	4.04239	3.96795	4.13809	4.08041	3.99444	3.93857	4.03839	4.18407	4.89338	4.28999	4.3665	4.89746	4.68995	4.61749
212736_at	6.43692	6.77876	6.68951	6.82508	6.74304	6.98641	6.75301	6.73822	6.73296	6.75785	6.7579	6.97768	7.10009	6.65204	7.14137	7.55375	7.5552	7.32691
212746_s_at	7.14162	7.29163	7.31386	7.47676	7.25662	6.98272	7.59414	7.63641	7.45158	7.55193	7.64323	7.80433	7.75209	7.6145	7.96219	8.1988	8.01486	7.95844
212753_at	5.64822	5.64575	5.56802	5.7287	5.64904	5.6213	5.75908	5.81149	5.69096	5.86429	6.03245	6.06476	6.23	6.13836	6.16735	6.38221	6.60247	6.45321
212764_at	4.62364	4.79731	4.53478	6.1571	5.65001	5.87108	6.76443	6.60289	6.6987	6.92519	6.81778	7.27437	7.85469	7.15247	7.76237	7.95771	7.88484	7.81412
212778_at	5.91378	5.68768	5.82693	5.73186	5.909	6.06209	6.06857	6.11759	5.97993	5.86999	6.3181	6.10757	6.19779	6.17357	6.50529	6.63748	6.62968	6.55864
212820_at	6.14664	6.04674	5.97159	6.59195	6.34403	5.99784	6.7346	6.59195	6.63812	6.63606	6.32624	6.92867	7.19773	6.64007	7.00273	6.66196	6.75511	6.73019
212830_at	4.59782	4.86983	4.717	4.9203	4.88846	4.94919	5.04004	5.18646	5.20202	5.23866	5.21175	5.4176	5.87603	5.31873	5.66503	5.96975	6.13276	5.73666
212843_at	7.33089	7.5967	7.46447	8.05797	8.09955	8.12192	8.27312	8.13628	8.28863	8.10378	8.10104	8.3225	8.51435	8.63388	8.75414	9.20886	8.95367	9.09796
212866_at	5.12872	5.52003	5.28215	5.72737	5.51157	5.92193	5.73594	5.69499	5.71091	5.93355	5.73871	5.83182	5.79839	5.67971	5.8763	6.05993	6.05784	6.09109
212870_at	5.62524	5.69009	5.65386	5.83143	5.53061	5.54675	5.7353	6.04136	5.72028	5.68514	6.02667	6.00238	6.55004	5.9016	6.11809	6.22399	6.6953	6.20586
212877_at	7.16361	7.26238	7.22002	7.22522	7.16002	7.29318	7.07163	7.08368	6.96659	6.63094	7.0783	7.12381	7.1435	7.23341	7.59204	7.82493	7.86096	7.885
212878_s_at	7.53192	7.57384	7.53715	7.59134	7.55028	7.80431	7.43523	7.24292	7.25316	7.1641	7.6226	7.76889	7.73667	7.71075	7.74885	8.28548	8.30399	8.15451
212909_at	5.09943	5.20748	5.15788	5.47806	5.31663	5.55354	5.41918	5.41313	5.92056	6.11178	6.09208	5.9327	6.06758	5.9845	6.04157	6.19935	6.15974	6.23798
212912_at	4.71759	4.76605	4.63104	4.59239	4.65976	4.80134	4.81234	4.76768	4.85915	4.82596	4.97558	5.02021	5.30373	5.32548	5.31666	5.55683	5.78366	5.46245
212956_at	5.73126	5.62851	5.6472	5.56148	5.60489	5.77869	5.86547	5.19235	5.41028	5.21555	5.70303	6.23767	6.39261	5.89893	6.1443	6.21866	6.72834	6.52387
212977_at	6.19474	6.29211	6.19347	6.6065	6.17441	7.07474	6.62897	6.63305	6.87483	6.8926	7.18919	7.36035	7.2664	6.95688	7.10188	7.24202	7.34662	7.2266
213029_at	4.68082	4.72422	4.50213	4.65386	4.77456	4.70158	4.73586	4.99302	5.03967	4.93299	5.30426	5.27363	5.77871	5.76857	5.88232	6.31477	6.52715	6.51027
213032_at	3.66106	3.55479	3.46979	3.70476	3.62691	3.73158	3.66478	3.6825	3.86686	3.8535	3.81976	4.14714	4.16992	4.20302	4.38454	4.48895	4.93857	4.90123
213046_at	6.90921	7.42952	7.28649	7.55336	7.63913	7.49269	7.76247	7.81786	7.79699	7.52161	7.22954	7.90689	8.04225	7.8681	8.13053	8.1413	8.05406	7.85254
213049_at	5.30259	5.45395	5.49256	5.26685	5.36412	5.22293	5.44621	5.57916	5.39983	5.30132	5.82301	5.60059	5.95489	5.65341	5.83808	6.02867	6.18238	5.78635
213058_at	6.76109	6.91723	6.954	7.3079	7.01314	7.39499	7.12206	7.21768	7.44854	7.23691	7.35981	7.37747	7.29226	7.58041	7.68174	7.87529	7.88884	7.74507
213106_at	4.03097	3.79708	3.93732	4.25828	3.98954	3.91362	4.23738	4.24243	4.20236	4.3567	4.4066	4.43859	4.70861	4.67146	4.72514	4.39056	4.78408	4.50622
213147_at	6.5	6.36862	6.25443	6.83048	6.74839	6.59139	7.30998	6.89175	7.26864	7.03983	6.69013	7.11753	7.38967	7.5136	7.38695	7.66465	7.5819	7.33044
213150_at	4.35561	4.23402	4.49387	4.92686	4.68578	4.96193	5.60143	5.69206	5.78199	5.33969	5.05605	5.23992	5.9684	5.62024	5.83242	6.13417	6.45086	5.9739
213156_at	3.51304	3.84644	3.78176	3.98306	3.77733	3.70046	4.00859	3.86693	4.12529	3.88483	3.90828	4.09673	4.45618	4.13587	4.24934	5.05521	4.72745	4.33155
213158_at	3.64901	3.5881	3.68592	3.59714	3.7945	3.72981	3.73456	3.58689	3.91402	3.92227	3.88114	3.91401	4.48866	4.13113	4.15853	4.45108	4.6316	4.36518
213169_at	6.04893	5.89573	5.80723	6.02723	5.7788	6.06541	6.09961	5.97736	6.16526	6.45382	6.33417	6.34774	6.47942	6.56309	6.39143	6.63645	6.90954	6.75002
213170_at	6.02455	6.14559	5.94859	5.99092	6.17731	6.64442	6.26192	6.24356	6.32171	6.64799	6.8723	6.88005	6.80724	6.84059	6.72685	7.4166	7.47558	7.25582
213194_at	7.98196	8.08662	8.10826	8.37853	7.97834	8.07892	8.21709	8.12608	7.93707	8.07689	8.00895	8.09305	8.62858	8.13578	8.46284	8.85352	8.81564	8.71304
213222_at	4.22744	4.28594	4.24613	3.93815	4.1115	4.01947	4.24994	4.12759	4.05478	4.37029	4.41563	4.35638	4.79022	4.58625	4.55485	4.47787	4.69485	4.68724
213229_at	7.89497	7.68504	7.57255	7.83337	7.55311	7.72467	7.89264	8.00489	7.81854	7.58912	8.14065	8.23573	8.3012	8.12264	8.11808	8.54049	8.57421	8.13276
213238_at	5.10737	5.15941	5.16386	4.84856	4.95608	5.25706	5.3193	5.02323	5.23176	5.30942	5.47773	5.49401	5.58381	5.57912	5.66336	5.69973	5.94482	5.7764
213249_at	7.16432	7.00608	7.24755	7.43759	7.46341	7.7479	7.83718	7.82176	7.58167	7.78071	7.83727	8.05334	8.03349	7.89263	7.97784	8.30689	8.13376	8.17061
213260_at	7.36048	7.44542	7.33314	7.95171	7.63471	7.8814	7.92855	7.9105	8.19705	7.94628	8.16657	8.35039	8.26888	8.00723	8.15867	8.00782	8.2966	8.31778
213262_at	5.78696	5.94058	5.95255	6.986	6.41974	5.95165	6.48272	6.62866	6.59887	6.46984	6.67137	6.76916	6.95333	6.55254	6.6786	7.13642	6.85406	6.78252
213288_at	6.5627	6.59502	6.65518	6.86042	7.03663	6.6792	6.98697	7.08491	7.14566	7.13488	7.26154	7.14322	7.5337	7.4972	7.44025	7.39206	7.51986	7.45002
213371_at	4.58851	4.45505	4.63165	5.72325	5.57277	5.71325	5.67604	5.77432	5.65031	5.5657	5.67686	5.58151	5.58448	5.4593	5.56281	5.11333	5.47898	5.46423
213380_x_at	7.33829	7.12075	7.08165	6.88416	7.16758	6.8113	6.76154	6.77006	6.92418	6.80716	6.89846	6.77015	7.02165	7.55454	7.21226	7.49072	7.3324	7.57695
213405_at	5.99047	5.96523	5.94941	5.96338	5.92874	5.82272	5.95583	6.25814	6.22344	6.31477	6.51691	6.51019	6.91828	6.50077	6.81789	6.89984	7.03214	6.89435
213416_at	3.9985	3.81094	4.04536	3.98268	4.02698	3.87226	4.10175	4.36418	4.25491	4.0778	4.26654	4.36695	4.66826	4.48544	4.38362	4.79781	4.68363	4.81938
213417_at	5.34512	5.0386	5.17413	5.26836	5.23392	5.53966	5.54628	5.54704	5.73055	5.62496	5.52632	5.80164	6.13454	5.81298	6.0805	6.13425	6.20459	6.03099
213436_at	3.83127	3.93043	3.90163	4.04738	3.84995	4.06331	4.1299	4.06252	4.1241	4.13408	4.34941	4.24911	4.73093	4.23353	4.86765	5.80851	4.75396	5.08323
213467_at	7.53886	7.15509	7.33551	7.25201	7.31672	7.38784	7.11008	7.02765	6.99451	6.93896	7.11471	7.18826	7.46301	7.46886	7.23386	8.0017	7.70203	7.65714
213476_x_at	11.007	11.1568	11.0742	10.9647	10.9958	11.1199	10.8689	10.9718	10.8793	10.8094	11.1721	11.2733	11.4314	11.4488	11.4583	11.6823	11.808	11.7156
213486_at	5.38195	5.46014	5.42164	6.09259	6.1318	6.04701	6.4182	6.81627	6.63945	6.67822	6.76968	6.11542	6.57257	6.25371	6.49811	6.36351	6.60059	6.63519
213489_at	6.84868	6.98915	7.00795	7.43817	7.51051	7.63813	7.58117	7.53402	7.57142	7.39903	7.65019	7.63996	7.88849	7.98147	8.01346	8.45892	8.45318	8.16997
213492_at	9.23371	9.24497	9.19105	10.3913	10.3848	10.4367	10.4894	10.791	10.4465	10.3127	10.6687	10.432	10.4316	10.3123	10.3664	10.4672	10.4074	10.4477
213515_x_at	12.1248	12.1067	12.0253	12.1924	11.6016	12.1891	11.7461	11.4526	12.2998	12.4252	12.3988	13.2977	12.8535	13.2909	12.7553	13.0278	13.0444	12.9382
213519_s_at	4.35518	4.16056	4.13535	4.12524	4.2345	4.18828	4.14887	4.39569	4.17755	4.24782	4.35602	4.23052	4.76194	4.56486	4.55792	4.93011	4.73376	5.06229
213541_s_at	4.23128	4.32302	4.29035	4.4311	4.18547	4.56281	4.32907	4.21435	4.22266	4.14032	4.4512	4.45945	4.61521	4.76071	4.90443	4.83873	5.61002	4.92428
213543_at	3.978	3.87413	3.88007	3.80107	4.07248	3.89844	4.16489	4.19456	4.33962	4.63483	4.54673	4.46994	4.72424	4.81066	4.81034	5.04711	5.36117	4.75879
213547_at	5.52435	5.48298	5.32805	5.47562	5.20469	5.7809	5.52342	5.60744	5.33953	5.72122	5.58714	5.79599	6.19752	5.60354	5.80115	6.1752	6.52543	6.09296
213573_at	6.91203	6.72184	6.86868	7.37719	7.32446	7.43505	7.46445	7.26051	7.49782	7.41707	7.64553	7.68656	7.40507	7.30559	7.60761	7.54239	7.6034	7.43134
213574_s_at	8.4708	8.44444	8.38133	9.17593	9.03049	9.25192	9.09715	9.35269	9.23291	9.31495	9.41425	9.43799	9.09956	9.36538	9.45795	9.48369	9.4541	9.39588
213587_s_at	5.95503	5.83976	5.68698	6.2445	5.94456	6.41137	6.39161	6.30376	6.13699	6.01941	6.02893	6.48466	6.47973	6.57777	6.43757	6.58792	6.50306	6.44512
213601_at	6.95086	6.92741	6.98196	7.1865	6.89122	7.47089	6.96456	7.31724	7.42272	7.66542	7.82517	7.56082	7.53211	7.85335	7.78039	8.06922	7.76289	7.93767
213605_s_at	7.75333	7.86039	7.7182	7.79887	8.0325	7.7001	8.36661	8.71175	8.65067	8.21437	8.52827	8.39266	8.88729	8.30343	8.48646	8.36777	8.21261	8.16495
213627_at	8.17665	8.11318	8.18483	8.13917	8.27938	8.38712	8.17965	8.26566	8.15982	8.35788	8.47024	8.46136	8.6941	8.48657	8.61886	8.91488	9.13196	8.99561
213657_s_at	5.73904	5.9458	5.96593	6.18531	6.18364	6.3056	6.26912	6.31514	6.45208	6.39479	6.59416	6.27328	6.45136	6.35709	6.60504	6.64519	6.6291	6.40695
213658_at	5.69354	5.3582	5.40301	5.6184	5.60426	6.02407	5.81718	6.00342	6.09116	6.09034	6.1118	5.92692	6.2217	6.17576	6.16926	6.10428	6.21251	5.90974
213668_s_at	7.03271	7.09402	7.0043	7.19091	7.09516	7.46766	7.45557	7.46496	7.22682	7.31959	7.37556	7.9463	7.6822	7.35451	7.99453	8.12278	8.14285	8.03293
213676_at	5.43323	5.24204	5.51111	5.23263	5.36851	5.37093	5.35605	5.38767	5.49356	5.60446	5.92229	5.48931	5.89937	5.85429	5.63026	6.0969	6.10915	5.99247
213703_at	4.11065	4.19516	4.2669	4.66909	4.63657	4.27393	4.67398	4.62345	4.69365	4.78869	5.16651	4.80411	5.34841	4.5684	4.93394	5.33054	5.2389	5.17549
213712_at	4.19609	4.18451	4.0437	4.35028	4.57815	4.74037	4.53357	4.6373	4.43664	4.50267	4.82714	4.7053	4.85377	4.75897	5.00484	5.00083	5.03232	4.78597
213750_at	5.82705	6.00986	5.81865	6.35329	6.14516	6.31077	6.38682	6.28884	6.47269	6.69203	6.45986	6.41338	6.39296	6.31003	6.52791	6.53024	6.72765	6.46522
213768_s_at	5.84489	5.38111	5.56299	5.69833	5.56367	5.5795	5.67149	5.94966	6.00205	6.13849	6.00251	6.00285	6.07303	6.35303	6.20375	6.17183	6.21314	6.2771
213782_s_at	3.67308	3.31245	3.32948	3.76708	4.02035	4.6558	4.80669	4.74512	4.85348	5.09413	5.1866	5.05711	4.96587	4.84847	4.84244	4.86319	4.80179	4.68302
213784_at	5.64483	5.66137	5.47647	5.60821	5.5728	5.64509	5.52215	5.82002	5.87866	5.90592	6.15138	5.81076	6.06022	6.12611	6.10151	6.12244	5.92612	6.02897
213803_at	6.73864	7.1865	6.8342	7.86179	7.45226	7.82016	7.83335	7.87877	7.77281	7.70969	7.40492	8.00105	7.82306	7.78466	8.12738	8.04187	7.67034	7.71502
213823_at	5.85169	6.25196	6.09037	5.88463	6.08558	6.26478	6.37634	6.37733	6.49971	6.53633	6.37309	6.53557	6.78628	6.82234	6.89277	6.95547	6.6434	6.90255
213825_at	4.14093	4.01972	3.97938	4.03233	4.13463	4.72304	4.4065	4.52515	4.89427	5.04847	5.29697	5.10658	5.32255	5.07663	5.11653	4.58249	4.53215	4.62971
213844_at	5.66638	5.86779	6.03554	7.48838	7.46852	7.86059	8.12926	7.99622	7.9722	8.09426	8.09412	8.26602	8.66254	8.37312	8.37442	8.66965	8.77556	8.52938
213847_at	6.99885	7.0596	6.83159	6.6811	6.74586	6.64846	6.77154	6.90296	7.01453	7.29745	7.19148	7.19214	7.24801	7.21017	7.28991	7.69979	7.59638	7.6798
213874_at	5.49239	5.37578	5.57088	5.52106	5.76769	5.60739	5.70992	5.77404	5.48163	5.71332	5.74558	5.82569	5.94649	5.95446	5.93677	6.49223	6.22517	6.32009
213894_at	3.86918	3.79277	4.04722	3.70347	3.78398	3.7695	3.82583	3.94889	3.81549	4.12875	4.11501	4.2532	4.77973	4.72117	4.96888	5.13442	5.17562	4.97001
213905_x_at	5.75767	5.65908	5.69548	5.80236	6.07428	6.01372	6.04754	6.15353	6.16817	6.17196	6.23687	6.18846	6.25253	6.15601	6.33932	6.46288	6.62772	6.29038
213920_at	4.33744	4.29273	4.26415	4.0639	4.01819	4.20599	4.27127	4.08659	4.032	4.34059	4.50159	4.23107	4.74238	4.33853	4.49373	4.64761	5.01911	4.88108
213939_s_at	5.38694	5.40364	5.39516	5.38473	5.43164	5.47423	5.74646	5.76888	5.66621	5.68991	5.96183	6.00782	6.90892	6.45461	6.63101	7.27016	7.19904	6.99215
213943_at	6.34404	6.82691	6.44809	7.18939	6.82993	7.81206	7.86785	7.88704	7.95643	7.93859	8.30207	8.40989	8.36364	8.27224	8.46497	8.67466	8.48686	8.53704
213977_s_at	6.31873	6.42957	6.52797	6.71223	6.74982	6.90996	6.87145	6.82513	6.95657	6.9239	7.02301	6.92131	6.93898	6.91551	6.87663	7.14276	7.07307	7.09229
213990_s_at	5.17649	4.98671	4.97507	4.94943	5.14697	5.08886	5.06293	5.45742	5.34957	5.39376	5.47182	5.22845	5.55943	5.51005	5.53039	5.91347	5.73811	5.62072
214023_x_at	9.20045	9.27138	9.45397	8.9588	8.85451	9.22827	8.93711	8.82824	8.80182	8.94727	9.2041	9.07738	9.32621	9.15539	9.35169	9.82397	9.80456	9.3249
214036_at	7.22216	6.87717	7.04628	7.24571	7.33272	7.49624	7.47389	7.61574	7.60326	7.61844	7.63674	7.57611	7.95942	7.55552	7.54252	7.73323	7.44141	7.77805
214051_at	7.14827	7.15145	7.10464	7.41665	7.41148	7.57418	7.46266	7.48634	7.2642	7.44327	7.52989	7.61937	7.65603	7.57343	7.75045	7.89554	7.92007	7.86683
214106_s_at	5.99056	5.6596	5.89499	5.7064	5.99998	6.06911	6.11338	6.08978	6.13432	6.501	6.32619	6.44226	6.51921	6.47094	6.54072	6.36358	6.67717	6.39224
214110_s_at	5.02947	5.01311	4.78233	4.91948	4.91511	5.27154	5.34272	5.42523	5.36874	5.81964	5.56096	5.33515	5.39352	5.41829	5.3911	6.00318	5.89574	5.8453
214162_at	4.76111	5.06486	4.87404	5.56197	5.33657	5.41564	5.39932	5.51362	5.49715	5.40057	5.61716	5.50918	5.93614	5.70328	5.80983	6.02667	6.14317	6.35076
214261_s_at	4.60939	4.48431	4.45296	4.44996	4.49454	4.48254	4.47254	4.67425	4.55251	4.70622	4.66314	4.71957	4.86969	5.1067	5.02077	5.27075	5.27275	5.29376
214295_at	3.98419	3.97117	4.04531	3.86155	4.03281	3.95554	4.20887	4.39678	4.28059	4.26672	4.4321	4.50323	5.1249	4.61863	4.86905	5.07039	4.77172	4.7282
214298_x_at	5.51428	5.42093	5.36899	5.68727	5.84122	6.16797	6.23796	6.4003	6.71813	7.0292	6.86813	6.8457	7.08337	6.88392	7.03027	7.02832	7.19787	7.29658
214401_at	5.36445	5.48551	5.3455	5.43863	5.43345	5.43584	5.40406	5.56163	5.93279	5.53524	5.73883	5.59392	5.92409	5.82402	6.12831	6.20452	6.12838	6.19773
214407_x_at	7.07109	6.5684	6.87785	6.52404	6.42322	6.53923	6.38373	6.2029	6.76907	7.11842	6.99557	7.78103	7.40958	7.62291	7.13545	7.12356	7.36564	7.27727
214414_x_at	11.7488	11.6894	11.7213	11.8943	11.1933	11.8546	11.4099	11.1618	12.013	12.2206	12.1559	13.2385	12.9459	13.0042	12.7431	12.9493	12.9225	12.8328
214432_at	4.24374	4.08807	4.22807	4.26917	4.31919	4.41307	4.39022	4.36143	4.29837	4.44993	4.58329	4.1961	4.78951	4.92894	4.80715	5.15152	5.40872	5.25424
214434_at	4.92246	4.60833	4.85926	4.75734	4.96972	4.7177	4.66392	4.92486	4.85029	5.01096	5.17294	5.16701	5.26018	5.2955	5.27106	5.32234	5.61276	5.50894
214451_at	4.4855	4.44111	4.65845	5.34599	5.30261	5.62681	5.72549	5.7471	5.82452	5.69076	5.73937	5.93444	5.70501	5.496	5.67923	6.00121	6.13334	6.04142
214457_at	5.74799	5.55361	5.57042	5.89323	6.06539	6.11527	6.07719	6.11887	6.17155	6.28347	6.54135	6.35095	6.63806	6.42444	6.39755	6.26815	6.50771	6.4104
214500_at	4.63016	4.82052	4.71107	5.2041	5.30783	5.41153	5.23742	5.34141	5.56171	5.36232	5.28424	5.57978	5.75936	5.363	5.47886	6.00145	5.94703	5.68202
214564_s_at	4.66547	5.16844	4.77382	5.23052	5.22575	5.53825	5.5232	5.7848	5.81476	5.44448	5.86794	5.88785	5.68417	5.80191	5.9331	5.92868	5.88383	5.79785
214577_at	5.90588	5.60974	5.51239	6.04392	5.95947	6.00238	5.95736	6.23355	5.80481	6.26164	6.54661	6.56667	6.58305	6.86844	6.74763	7.14854	7.16026	6.99284
214604_at	4.73813	4.59824	4.54827	4.66489	4.73401	4.6108	4.90305	4.92249	5.10155	5.13089	5.18454	5.10225	5.31174	5.42651	5.30734	5.44996	5.54463	5.23748
214607_at	5.71407	5.45511	5.62007	5.3726	5.64878	5.35131	5.47573	5.7346	5.75526	5.6932	5.79688	5.80482	5.9769	6.34631	6.02978	6.41111	6.15185	6.12682
214628_at	6.73297	6.42614	6.44783	6.63762	6.87902	6.80951	6.7633	7.01361	6.79674	7.23617	7.50918	7.44368	7.92077	7.63028	7.72404	7.97296	7.93542	7.90466
214633_at	6.69599	6.8226	6.67299	7.15899	7.07228	7.46246	7.18837	7.26697	7.17709	7.22894	7.57844	7.78961	7.76983	7.44359	7.63694	7.49956	7.57337	7.40257
214636_at	4.26211	4.22491	4.28439	4.33851	4.4044	4.29481	4.21113	4.27522	4.32274	4.61765	4.6251	4.53435	4.87485	4.62291	4.79193	4.94786	5.25752	4.96712
214651_s_at	4.90194	4.78453	4.69622	6.94289	6.92748	6.87527	7.21726	6.93922	6.88402	6.62826	6.48351	6.95198	7.72015	6.88762	7.33412	7.27092	7.668	7.55977
214670_at	6.36622	6.47799	6.39832	6.44067	5.8091	6.2059	6.22464	6.55169	6.41355	6.3299	6.86801	6.57058	7.22203	6.89134	7.22279	7.06357	6.99314	7.0212
214721_x_at	7.33553	7.20503	7.23843	7.45944	7.42558	7.42198	7.46143	7.55674	7.50111	7.54329	7.99009	7.60806	7.84332	7.78287	7.96735	8.28442	8.41733	7.98638
214722_at	7.85657	7.96869	7.9736	8.13775	8.38452	8.24314	8.4805	8.51111	8.62222	8.31793	8.73914	8.67144	9.28353	8.76408	8.82664	8.79953	8.95584	8.72155
214724_at	6.48098	6.79833	6.73733	7.04979	6.99705	7.37163	7.148	7.17468	7.35112	7.18452	7.09982	7.37618	7.38436	7.14138	7.32891	7.18545	7.30837	7.37122
214753_at	5.22023	5.44211	5.36167	5.47965	5.45354	5.36918	6.01459	6.1325	6.56065	5.92325	6.07385	5.97022	6.40939	5.82727	6.28423	6.02198	5.9112	5.82249
214761_at	8.2046	8.06538	8.34455	8.10909	8.0641	8.37687	8.21661	8.17816	8.29676	8.23148	8.59026	8.52607	8.72439	8.41919	8.65988	8.70166	8.90193	8.71326
214803_at	5.71956	5.46363	5.72785	6.07432	6.31172	5.97767	6.5253	6.73797	6.55784	6.80716	6.83582	6.60894	6.61877	6.79361	7.03456	7.26885	6.98649	6.97183
214839_at	5.7284	5.65981	5.58557	5.48877	5.67164	5.4154	5.58306	5.58413	5.94927	5.7892	5.87314	5.7566	6.20622	6.10718	5.98698	6.14976	6.14496	6.15356
214844_s_at	6.18003	6.00818	6.12106	5.66833	5.53894	5.71325	5.52707	5.67939	5.71042	5.79517	5.82209	5.85038	5.97834	6.30806	6.20227	6.43046	6.48968	6.34593
214855_s_at	5.20491	5.3647	5.32784	5.42192	5.55637	5.31031	5.74262	5.73084	5.73392	5.61928	5.83635	5.77206	6.20315	5.79534	5.97462	5.83776	5.99282	5.83635
214909_s_at	7.50305	7.4924	7.39787	7.94371	7.96077	8.13632	7.9015	7.9116	7.88759	7.88225	7.99658	8.08606	8.22567	8.15966	8.28523	8.58622	8.47223	8.60168
214910_s_at	7.38568	7.56284	7.49504	6.75271	6.83207	6.80389	6.95678	6.40542	7.01851	6.72149	6.85265	6.47831	7.49827	7.69126	7.55023	8.20366	8.3654	8.54909
214920_at	3.60929	3.67448	3.58792	3.67666	3.77004	3.68201	3.56439	3.60931	3.71223	3.70823	4.02371	3.98016	4.55264	4.31767	4.4764	5.10959	4.9553	5.05808
215073_s_at	3.91305	3.61364	3.51537	5.14587	4.9608	5.54822	6.24941	6.16699	5.7743	5.73051	6.05772	6.06803	6.16844	5.52263	6.20159	5.89071	5.84728	5.81529
215116_s_at	6.39546	6.1937	6.10011	6.4983	6.99734	6.69587	6.84139	6.94968	7.00772	6.86005	6.98976	7.04139	7.69974	7.32112	7.31931	7.77059	7.68299	7.4444
215333_x_at	7.22551	6.98818	6.96692	7.06816	7.07209	6.93401	7.01599	7.13393	7.45068	7.60161	7.62994	7.17199	7.44048	7.50318	7.61035	7.50758	7.60108	7.54359
215387_x_at	5.46746	5.3225	5.44864	5.62213	5.71678	5.73753	6.21921	6.18807	6.11128	5.97772	6.0325	6.30935	6.36741	5.89382	6.1761	5.88957	5.81274	5.79229
215429_s_at	6.56634	6.46035	6.5685	7.04531	7.05148	7.12324	6.98975	7.1522	7.27001	7.25671	7.47789	7.307	7.45586	7.46618	7.47946	7.82234	7.78175	7.62026
215434_x_at	8.02627	7.98706	7.85537	7.76304	7.94366	7.94477	8.0703	8.24243	7.99972	8.11323	8.32679	8.48491	8.48629	8.57624	8.41137	8.33064	8.45817	8.57435
215489_x_at	7.00953	6.91713	7.04917	7.50419	7.48816	7.53561	7.46634	7.5781	7.43421	7.52203	7.54929	7.59853	7.58796	7.50295	7.48996	7.66842	7.74337	7.53669
215537_x_at	8.14309	8.39299	8.44913	8.94842	9.06536	9.07666	9.02034	9.00459	8.85131	8.74258	8.99926	9.1189	9.21319	9.16859	9.23786	9.33547	9.43475	9.45087
215692_s_at	4.12886	4.04019	4.11855	4.11346	4.19022	4.10042	4.21512	4.11619	4.17991	4.28138	4.39603	4.20157	4.86279	4.29567	4.51704	4.96407	5.13562	5.01223
215836_s_at	7.52157	7.62559	7.35269	8.06717	8.10472	8.27084	8.33873	8.53663	8.54858	8.55273	8.92707	8.75105	9.11081	8.86087	8.82197	8.89933	9.0837	9.03332
215945_s_at	6.75687	6.87201	6.77471	6.73106	6.73202	6.69663	6.69443	6.52584	6.60591	6.65829	6.98327	7.06819	7.04946	7.10598	7.21491	7.58593	7.70234	7.4459
216060_s_at	6.27802	6.51579	6.56272	6.77392	6.46938	6.40841	6.74864	6.47489	6.75646	6.76083	7.09788	6.9908	7.26021	6.90199	7.01526	7.25076	7.29604	7.04417
216147_at	3.7247	3.64479	3.5347	3.6913	3.6126	3.94895	4.22201	4.25432	4.33515	4.1862	4.48153	4.36169	4.5694	4.11277	4.06391	3.94683	3.87984	3.94878
216235_s_at	5.99685	5.94338	5.95989	6.46195	6.5107	6.7321	6.93538	7.24227	7.18304	7.02959	7.13302	7.45205	7.38977	7.32263	7.42863	7.39035	7.69945	7.64586
216247_at	4.1055	3.87757	3.93073	3.83617	3.84526	4.4261	4.01984	4.49778	4.42442	4.55212	4.58201	4.4537	4.47755	4.69514	4.53782	4.5933	4.82309	5.09182
216320_x_at	8.19245	7.93232	8.03057	7.69217	7.99363	7.70273	7.75759	7.66218	7.77008	7.74617	7.57621	7.89527	8.10952	8.39189	8.10735	8.45817	8.2147	8.48915
216321_s_at	4.392	4.57491	4.61471	4.13226	4.23356	4.33815	4.34238	4.20234	4.47067	4.61868	4.46959	4.74461	4.79859	4.56238	4.80528	4.88706	5.40125	5.03732
216352_x_at	4.8616	4.68825	4.7319	5.04287	5.06703	5.3912	5.18855	5.3265	5.33189	5.41043	5.78359	5.58226	5.79627	5.57527	5.76442	6.04272	5.74832	5.93682
216438_s_at	10.8644	10.8383	10.7279	10.4975	10.6326	10.8344	10.6594	10.5967	10.6143	10.5719	10.9512	10.91	10.9368	11.0284	10.9971	11.2064	11.2307	11.0191
216696_s_at	6.81549	6.59986	6.71349	6.19235	6.61871	6.33636	6.39225	6.35613	6.41694	6.69067	6.95735	6.49926	6.9182	7.18858	6.9505	7.14748	7.41911	7.094
216831_s_at	4.8094	4.86967	4.66796	4.82448	4.71264	4.86365	4.8916	5.07434	4.87837	4.94355	5.01385	5.30663	5.59832	5.2249	5.42488	5.59277	5.8297	5.31406
216963_s_at	5.43222	5.35841	5.2919	5.45473	5.39798	5.46783	5.38457	5.14326	5.42352	5.62428	5.57249	5.57334	5.92775	6.11134	6.23481	7.11035	6.94302	7.03852
217286_s_at	7.08954	6.80362	6.96724	6.97982	7.00299	7.06737	6.94494	7.09006	6.99316	7.18727	7.26267	7.33911	7.38726	7.23782	7.3822	7.60138	7.42749	7.43085
217317_s_at	6.96744	7.06935	6.81735	6.66226	6.73421	7.12021	7.28682	7.20178	7.29816	7.26498	7.31855	7.51016	7.73003	7.47149	7.80964	7.67337	7.93741	7.92296
217404_s_at	8.26568	8.27348	8.40692	9.78236	9.76445	9.86572	9.95151	10.0942	9.86049	9.66207	9.97979	9.8761	9.91287	9.43271	9.70794	9.80309	9.76776	9.60269
217414_x_at	11.4602	11.454	11.4563	11.8927	11.3422	11.793	11.4471	11.1323	12.0275	12.1388	12.0619	13.3181	12.9138	13.2837	12.6513	12.863	12.7983	12.7494
217506_at	4.72832	4.71527	4.81119	4.73588	4.58781	4.83166	4.97632	4.97773	4.77977	4.91673	4.93376	4.91857	5.48713	4.89643	5.37973	5.27867	5.64926	5.52909
217521_at	5.13857	4.85303	4.89731	4.69473	4.86757	4.8216	4.78485	5.04006	5.01371	5.1008	4.97901	4.78557	5.3553	5.44989	5.23503	5.60903	5.89248	5.48744
217564_s_at	4.19206	4.37947	4.30731	4.10823	4.09382	4.32233	4.33172	4.05791	4.12279	3.82711	3.94876	4.00356	4.42607	4.21544	4.39935	5.04728	4.75767	4.76878
217591_at	5.20299	4.73984	4.89373	4.84606	5.16087	5.16503	5.28384	5.53109	5.50221	5.61497	5.5045	5.62962	5.32591	5.90873	5.74424	5.79771	5.46135	5.55528
217653_x_at	5.21102	5.17511	5.06736	5.06929	5.38589	5.53894	5.47552	5.85101	5.77503	5.47888	5.86289	5.61399	5.80739	5.79426	5.97779	5.86712	5.85508	5.53939
217760_at	7.25876	7.45448	7.1067	7.54267	7.44073	7.62347	7.60701	7.73907	7.59566	7.83256	8.06581	7.84909	8.06318	7.72032	7.99677	8.25782	8.25326	8.16759
217837_s_at	6.35647	6.34722	6.27631	6.61812	6.89399	7.16057	7.23628	6.66582	7.16491	7.24484	6.98061	7.47734	7.31786	7.10595	7.2546	7.2529	7.20008	7.50216
217838_s_at	7.16288	7.04451	7.21376	7.65732	7.66433	7.90231	7.92256	7.87754	7.6843	7.72721	7.74784	7.93777	8.00943	7.84877	8.04794	8.25585	8.17846	8.27948
217856_at	6.49833	6.01341	6.21127	7.00031	6.97628	6.96948	6.82032	7.02374	6.97824	6.97347	7.08624	6.7995	6.76405	6.87844	6.8783	7.26996	7.21173	7.20366
217870_s_at	5.9344	5.93025	5.80888	5.56273	5.53922	5.90489	6.04251	5.9001	5.96306	6.03466	6.36667	6.47656	6.65389	6.42441	6.58155	6.57637	6.85848	6.67632
217875_s_at	4.34209	4.30042	4.32784	4.23073	4.50598	4.36842	4.45545	4.44093	4.24829	4.51763	4.72418	4.42535	4.69112	4.70126	4.7086	5.07633	5.12413	5.23894
217892_s_at	7.39952	7.11399	7.30771	7.16929	7.05524	7.11319	7.36415	7.62782	7.30884	7.41947	7.80089	7.47023	7.9857	7.77032	7.80575	8.06747	7.92285	7.59036
217941_s_at	6.45647	6.51452	6.8936	6.86563	6.46285	6.63396	7.1266	7.08824	6.80516	6.96836	7.04798	7.52985	7.46097	6.94231	7.50875	7.53152	7.64792	7.56387
217985_s_at	4.69143	4.5345	4.774	4.9599	4.75267	4.72918	5.18862	5.24609	4.87173	5.09755	5.25641	5.77848	5.54836	5.38983	5.75578	6.02579	5.75248	5.47319
217986_s_at	5.54709	5.5386	5.56817	5.65764	5.62943	5.69033	6.28001	6.13703	5.68975	5.9711	6.47647	6.32649	6.83325	6.38787	6.55551	6.70602	6.82813	6.54647
217989_at	6.52456	6.53957	6.41906	6.25103	6.15194	6.64707	6.43725	6.10837	6.60961	6.49671	6.18175	6.54815	6.60718	6.82325	6.80175	6.90593	6.97503	6.92732
218002_s_at	5.25558	5.12516	5.21634	5.80878	5.9689	6.79285	6.48642	6.43434	6.68174	6.60354	7.24687	6.8919	7.26265	6.98194	6.93102	8.08315	8.02573	7.79807
218024_at	5.5869	5.80368	5.53892	5.92579	5.69829	6.08835	5.90559	5.87189	5.94594	5.96596	6.09075	6.22082	6.41505	6.21887	6.39683	6.48123	6.82858	6.70637
218045_x_at	6.81349	6.51328	6.52711	7.38029	7.46223	7.3926	7.40696	7.46513	7.20214	7.00617	7.04902	7.21246	7.14627	7.04019	7.29794	7.55464	7.57154	7.45779
218048_at	6.82765	6.43737	6.64338	6.679	6.82502	6.97528	7.03652	6.87007	6.98251	7.2262	7.00321	7.14936	7.30956	7.28717	7.14564	7.37158	7.50151	7.65088
218175_at	5.83564	6.01635	5.85457	6.16754	6.51311	6.38659	6.21743	6.28046	6.3451	6.15949	6.48204	6.234	6.45792	6.26801	6.52826	7.05269	6.99444	6.8262
218181_s_at	6.98157	7.46968	7.32315	7.55669	7.19285	7.56887	7.54754	7.51533	7.60674	7.43859	7.21858	7.57346	7.77792	7.46061	7.92985	8.09938	7.94465	8.0079
218197_s_at	4.36098	4.67428	4.52205	4.9993	4.61461	4.7196	5.41619	4.92971	5.17693	5.1355	4.93235	5.8602	5.13	5.28241	5.55685	5.55781	5.55296	5.5375
218242_s_at	5.70166	6.23926	6.15997	6.31465	5.94248	5.95954	6.22035	6.27112	6.35299	5.95382	6.69636	6.50055	6.64737	6.58088	6.8441	7.29709	7.42274	7.04417
218284_at	7.43102	7.39834	7.32405	7.65198	7.58151	7.85016	7.68462	7.83529	7.87062	7.82603	8.03936	7.79411	8.1602	7.95883	7.97076	8.32746	8.06217	7.97127
218285_s_at	7.60722	7.76158	7.66919	7.85282	7.75839	7.95272	7.9125	7.85818	8.0899	7.98563	7.99513	8.20387	8.29468	8.13484	8.23686	8.4962	8.38803	8.34694
218287_s_at	7.21094	6.80203	6.91637	7.08363	6.88134	7.17257	6.93036	7.14423	7.09115	7.23226	7.21229	7.36598	7.3524	7.42805	7.52237	7.69428	7.35285	7.58374
218309_at	6.96076	6.85169	6.92486	7.23473	7.23862	7.38523	7.09255	7.1532	7.20174	7.26022	7.48018	7.37072	7.74089	7.64242	7.69402	7.84074	7.91354	7.77884
218345_at	6.12464	6.02223	6.08817	5.66591	6.01012	5.89849	5.94063	5.94977	6.27589	6.37086	6.41311	6.25813	6.50034	6.6738	6.49697	6.62521	6.47904	6.57568
218375_at	7.24409	7.1486	7.09143	7.13112	7.05936	7.15196	7.14171	7.02966	7.10995	7.18592	7.59782	7.27417	7.49489	7.25339	7.2059	7.74003	7.69863	7.58172
218380_at	7.43176	7.33511	7.24881	7.77379	7.88542	8.46906	7.99193	8.0348	8.14612	8.42225	8.44485	8.43892	8.71561	8.63979	8.81593	8.9605	8.93222	8.93986
218502_s_at	4.42421	4.12906	4.30601	4.32785	4.38191	4.4661	4.38513	4.51302	4.40557	4.55733	4.78148	4.76863	4.92972	4.56106	4.85949	5.17106	5.3976	5.12514
218589_at	5.27376	5.20857	5.27372	5.69388	5.70705	5.907	6.40872	6.19952	6.48424	6.3211	6.46337	6.47814	6.55764	6.13868	6.25258	6.24661	6.45573	6.33056
218599_at	7.88983	7.9318	7.9109	8.46774	8.50503	8.5876	8.61341	8.61687	8.45447	8.62003	8.6117	8.72905	8.74674	8.54249	8.52228	8.42986	8.55586	8.63015
218603_at	6.13367	6.16081	6.12187	5.85714	5.78033	5.80094	5.97047	5.95468	6.05093	6.05607	6.15404	6.18519	6.52537	6.09645	6.44051	6.2639	6.5962	6.4111
218604_at	7.5917	7.7895	7.72379	7.37054	7.1435	7.57805	7.57203	7.45321	7.57209	7.61025	7.6815	7.85125	7.97338	7.78811	7.9613	7.91641	8.04838	7.79222
218613_at	5.74243	5.84685	5.84651	6.29353	6.18966	6.17262	6.27058	6.46888	6.35649	6.39479	6.22775	6.50451	6.80005	6.57446	6.67469	6.65861	6.86488	6.64901
218623_at	5.18323	4.71953	5.15281	4.86386	5.02976	4.80659	5.08153	5.03271	5.15022	5.27934	5.31998	5.18063	5.65347	5.65916	5.64114	5.78472	6.24781	6.20581
218641_at	7.63781	7.41929	7.42924	7.65269	7.40185	7.6903	7.3878	7.65031	7.34401	7.33193	7.66322	7.65228	8.00518	7.63121	8.09159	8.28912	8.37311	8.40636
218648_at	6.31288	6.06629	6.19438	5.94407	5.97606	6.25312	6.27609	6.50187	6.2173	6.45012	6.64615	6.54964	6.88568	6.88905	6.86151	6.96848	6.91202	6.79118
218678_at	9.10274	8.94513	9.11172	9.55861	9.67238	9.69104	9.60164	9.82113	9.71766	9.72375	10.149	9.92726	10.2575	10.1266	10.1504	10.2457	10.3363	10.2897
218723_s_at	4.16943	4.18228	3.99575	4.07491	3.75235	4.2585	4.11519	4.17971	4.22826	4.5123	4.62078	5.05709	5.06624	4.92066	4.8707	6.00172	5.62899	5.61655
218791_s_at	4.53606	4.6676	4.71004	4.77585	4.64916	4.59003	5.00706	4.91164	4.90849	4.88332	4.86053	4.94251	5.22487	4.92406	5.28689	5.47783	5.12151	5.24502
218820_at	7.71346	7.92598	7.69833	7.57419	7.207	8.09318	7.60848	7.97413	8.00361	7.85116	8.38004	8.36821	8.76834	8.60749	9.04154	9.49441	9.36328	9.28737
218844_at	6.29388	6.2601	6.07957	5.9287	6.11647	6.25663	6.30763	6.07709	6.28355	6.27541	6.43189	6.6044	6.88059	6.85304	6.56445	6.75758	6.84197	6.84582
218874_s_at	6.37689	5.84308	6.30073	6.33614	6.41533	6.39318	6.42547	6.63629	6.6112	6.50746	6.76086	6.56678	6.9713	6.99463	7.00006	7.11789	7.20778	7.00967
218888_s_at	6.67451	7.42454	7.12951	7.57299	7.46839	7.66591	7.57552	7.35106	7.28529	7.62071	7.70426	7.80067	8.1796	7.57164	7.83267	7.97762	8.14246	8.19253
218892_at	5.87557	5.65744	5.57912	5.91273	5.93787	5.88022	5.91129	5.92382	6.00582	6.09613	6.50246	6.10567	6.51894	6.2205	6.27234	6.56371	6.37137	6.45016
218934_s_at	5.29969	5.34761	5.0756	6.25481	6.66496	6.88115	6.6842	6.74914	6.72819	6.84617	7.13391	7.01272	6.76304	6.68342	6.76048	6.5712	6.40793	6.40388
218959_at	5.50299	5.58025	5.43398	5.85783	5.9033	6.04167	7.31277	7.17684	7.06214	6.75716	6.49951	6.2098	6.5217	6.48276	6.66991	6.80552	6.54551	6.53289
218974_at	6.00832	6.28159	6.12099	7.13302	6.72353	7.13807	6.90841	6.99326	6.84282	6.95631	7.28073	7.04139	7.23462	7.06474	7.46677	7.41183	7.72934	7.69972
218976_at	4.64157	4.76024	4.76165	4.79291	4.7983	5.18899	4.9151	4.80031	5.24512	5.42511	5.48671	5.54632	5.66233	5.69343	6.00013	5.56634	5.77528	5.64991
219054_at	6.02948	5.60035	5.76249	6.48777	6.87557	7.02392	7.34632	7.36296	7.55404	7.4688	7.88026	7.62026	7.86098	7.91562	7.91234	7.9862	8.18028	7.90029
219148_at	6.62863	6.94045	6.84639	7.43071	7.17183	7.76534	7.65639	7.63391	7.31745	7.38726	7.82754	7.87017	7.79973	7.53848	7.72995	7.90723	7.88828	7.70152
219197_s_at	4.66533	4.74849	4.77853	5.09423	5.06811	5.22551	5.37347	5.37387	5.29087	5.80805	5.51256	5.58984	5.69594	5.45152	5.78547	5.67306	5.52898	5.53453
219213_at	5.75158	5.52984	5.68315	5.51746	5.73802	6.06898	6.15582	5.98257	6.42358	6.59537	6.53085	6.62063	6.84604	6.87867	6.90356	6.93062	6.64751	6.84267
219257_s_at	5.34742	5.16896	5.37161	5.21324	5.27176	5.51464	5.47909	5.64991	5.51673	5.88709	6.04269	5.88521	5.80658	6.06783	5.94181	5.68182	5.81763	5.80337
219288_at	5.40199	5.47998	5.33295	5.33195	5.50098	5.76818	5.345	5.40712	5.37631	5.24666	6.00463	5.62733	5.83452	5.61725	5.68189	6.26896	6.42528	5.97037
219306_at	6.8971	6.86095	6.89981	7.57406	7.43415	7.02684	7.66273	7.6386	7.42056	7.41665	7.70062	7.73991	7.71328	7.52366	7.63002	7.5247	7.61302	7.72093
219315_s_at	5.49239	5.70709	5.42006	5.4085	5.52101	5.76161	5.87542	5.71771	6.08995	6.13777	6.37832	5.97017	6.2445	6.53344	6.41052	6.30417	6.74956	6.57205
219331_s_at	5.31415	5.14557	5.21429	5.27091	5.46371	5.62161	5.61514	5.79921	5.62366	5.60656	5.86491	6.0041	6.12039	6.22724	6.26888	6.38811	6.67123	6.52225
219355_at	4.63267	4.64987	4.70231	4.83613	4.97969	5.09161	5.09602	5.19985	5.1419	5.17152	5.3814	5.43292	5.34123	5.28446	5.39749	5.52541	5.29803	5.16576
219407_s_at	5.43649	5.42321	5.29941	5.10965	5.29564	5.23466	5.30257	5.45781	5.29237	5.42537	5.77685	5.49995	5.75215	5.78504	5.83907	5.96025	5.96948	6.05432
219427_at	4.43471	4.4726	4.40152	4.43271	4.54955	4.68423	4.71973	5.02812	5.04344	5.0049	5.49599	5.14222	5.94064	5.4975	5.57646	6.03028	6.02224	6.06974
219436_s_at	4.51466	4.26293	4.54157	4.57827	4.87138	4.96764	5.01585	4.73208	5.03497	5.23105	4.90222	5.03699	4.82325	5.00768	5.03842	5.22384	5.10687	5.03914
219463_at	6.13775	5.95603	6.02611	6.21451	6.2914	6.17185	6.15343	6.13835	6.33193	6.67143	6.49755	6.37309	6.93525	6.79744	6.48306	7.02773	6.80918	6.93202
219498_s_at	7.22217	7.12717	7.02787	6.69801	7.1227	6.88315	6.95274	7.03843	7.06089	7.0157	7.11503	7.06009	7.53305	7.72964	7.61707	8.15453	7.99719	7.87173
219511_s_at	6.82626	6.46551	6.92553	7.03361	7.20601	7.12031	7.31413	7.45222	7.25108	7.49452	7.87929	7.79168	8.0567	8.02166	7.90143	8.1627	8.3482	7.98382
219528_s_at	3.674	3.66224	3.73666	3.66497	3.65009	3.60337	3.61487	3.67666	3.75092	3.62383	3.66097	3.68859	4.07895	4.02656	3.90046	4.35456	4.3007	4.40671
[truncated: 151 more rows]

## Sheet: Sheet2
Gene Info					Log2 Ratio compared to the mean intensity across the developmental stages
AffyID	ACCN	EntrezGene ID	Symbol	Description	S9_R1	S9_R2	S9_R3	S10_R1	S10_R2	S10_R3	S11_R1	S11_R2	S11_R3	S12_R1	S12_R2	S12_R3	S13_R1	S13_R2	S13_R3	S14_R1	S14_R2	S14_R3
201650_at	NM_002276	3880	KRT19	keratin 19	2.09906	2.00244	1.95497	1.76037	1.57093	1.4356	1.02697	0.628092	0.663191	0.132733	-0.582443	-0.597547	-1.58196	-1.64919	-2.19271	-2.07189	-2.24744	-2.3512
202499_s_at	NM_006931	6515	SLC2A3	solute carrier family 2 (facilitated glucose transporter), member 3	1.6166	1.80506	1.78597	1.64451	1.37428	1.28772	1.01587	0.815973	1.11498	-0.0478401	-0.329878	-0.355033	-1.44758	-1.14821	-1.77776	-2.36338	-2.23255	-2.75874
219823_at	NM_024674	79727	LIN28	lin-28 homolog (C. elegans)	1.5527	1.72123	1.81155	1.29567	1.01077	1.01938	0.933851	0.765969	0.835071	0.683841	0.304327	0.338709	-0.851634	-1.13501	-1.03734	-3.03472	-3.13248	-3.08187
213506_at	BE965369	2150	F2RL1	coagulation factor II (thrombin) receptor-like 1	2.36817	2.81165	2.75394	1.84898	0.661814	1.20544	0.286124	-0.260309	-0.220346	-0.756649	-1.2624	-0.849184	-1.27162	-1.35416	-1.2772	-1.56537	-1.5171	-1.60178
222088_s_at	AA778684	6515	SLC2A3	solute carrier family 2 (facilitated glucose transporter), member 3	1.64422	1.67406	1.68008	1.3606	1.2184	1.15057	0.90673	0.7426	0.914921	-0.0660997	-0.663264	-0.285505	-1.51569	-0.962315	-1.57762	-2.20125	-2.02073	-1.99971
210074_at	AF070448	1515	CTSL2	cathepsin L2	2.57491	2.36078	2.43715	1.34786	1.16256	1.14261	0.160237	0.0818979	-0.209821	-0.652077	-0.879024	-0.804013	-1.3667	-1.39463	-1.46783	-1.65204	-1.35088	-1.49097
202856_s_at	NM_004207	9123	SLC16A3	solute carrier family 16, member 3 (monocarboxylic acid transporter 4)	1.46641	1.51738	1.37266	1.59215	1.12515	1.30708	1.07451	0.578606	1.07991	0.209553	-0.0833436	-0.680309	-1.53591	-1.1099	-1.67323	-1.99189	-2.11472	-2.13412
216236_s_at	AL110298	6515	SLC2A3	solute carrier family 2 (facilitated glucose transporter), member 3	1.50767	1.54179	1.67456	1.44331	1.19522	1.10339	0.831548	0.633363	0.919592	0.0734711	-0.472969	-0.384859	-1.38316	-0.951251	-1.67653	-2.00362	-2.00291	-2.04862
202498_s_at	BE550486	6515	SLC2A3	solute carrier family 2 (facilitated glucose transporter), member 3	1.12	1.73157	1.71957	1.47536	1.17235	1.06487	0.796069	0.717443	0.909182	0.0824193	-0.553887	-0.202773	-1.25254	-1.18125	-1.28734	-2.07866	-1.97044	-2.26194
205523_at	U43328	1404	HAPLN1	hyaluronan and proteoglycan link protein 1	1.56505	1.49896	1.78836	1.61157	1.21539	1.12194	0.816855	0.70818	0.30952	-0.226605	-0.228546	-0.477679	-1.04047	-1.88589	-1.24043	-1.82185	-1.71119	-2.00316
202855_s_at	AL513917	9123	SLC16A3	solute carrier family 16, member 3 (monocarboxylic acid transporter 4)	1.5843	1.35351	1.47856	1.43045	1.04422	1.1753	0.898646	0.627029	0.86776	0.125025	0.0584629	-0.698432	-1.33393	-0.916596	-1.36275	-2.07715	-2.19008	-2.06431
202497_x_at	AI631159	6515	SLC2A3	solute carrier family 2 (facilitated glucose transporter), member 3	1.48476	1.77886	1.44797	1.30253	1.0675	1.10769	0.85206	0.491781	0.881037	0.0971411	-0.587757	-0.23936	-1.14845	-0.921187	-1.73771	-1.8162	-1.87689	-2.18378
201839_s_at	NM_002354	4072	TACSTD1	tumor-associated calcium signal transducer 1	1.58509	2.29099	2.21732	1.11684	0.84203	0.953836	0.662517	0.28254	0.417474	-0.400475	-0.778	-0.798329	-0.954215	-1.38391	-1.3585	-1.33848	-1.45485	-1.90187
214639_s_at	S79910	3198	HOXA1	homeobox A1	1.58985	1.56558	1.58239	1.47828	1.02763	1.14409	0.928101	0.729174	0.302927	-0.169463	-0.523009	-0.458209	-1.35383	-1.39289	-1.46227	-1.80667	-1.66399	-1.51768
204637_at	NM_000735	1081	CGA	glycoprotein hormones, alpha polypeptide	2.3233	2.22123	2.33507	0.525166	-0.0592499	0.985248	0.0733569	0.150838	1.47014	-0.81039	-0.012248	-0.857343	-1.65407	-0.998733	-1.25275	-1.44483	-1.47489	-1.51983
201131_s_at	NM_004360	999	CDH1	cadherin 1, type 1, E-cadherin (epithelial)	1.72847	2.05298	1.87503	1.12337	0.700057	0.939552	0.478643	0.197523	0.21419	-0.270119	-0.82506	-0.911859	-1.13072	-1.32888	-1.36844	-1.17905	-1.10692	-1.18879
205328_at	NM_006984	9071	CLDN10	claudin 10	2.15049	2.30343	2.42506	1.09889	0.684019	0.606493	-0.12655	-0.177307	-0.17686	-0.454157	-0.818998	-1.07437	-0.969687	-0.55669	-1.39578	-1.3565	-1.04899	-1.1125
204337_at	AL514445	5999	RGS4	regulator of G-protein signaling 4	1.55444	1.5266	1.52088	1.32705	1.27653	1.16903	0.47983	0.111121	0.390387	-0.423472	-0.722605	-0.797401	-1.06918	-1.38102	-1.1526	-1.48061	-1.01298	-1.31601
220138_at	NM_004821	9421	HAND1	heart and neural crest derivatives expressed 1	1.49363	1.55154	1.5167	0.928745	1.17215	0.867184	0.549191	0.55455	0.606507	-0.38221	-0.52263	-0.579695	-0.964946	-1.03224	-1.29033	-1.49073	-1.37768	-1.59974
201596_x_at	NM_000224	3875	KRT18	keratin 18	1.2118	1.21908	1.2073	1.14381	1.11849	1.0035	0.732884	0.576666	0.51187	0.178161	-0.205489	-0.320907	-1.21768	-1.13126	-1.39096	-1.54107	-1.47946	-1.61674
209369_at	M63310	306	ANXA3	annexin A3	1.59296	1.57488	1.59447	0.638596	1.01831	1.06514	0.539785	0.471051	0.509526	-0.16878	-0.315738	-0.822178	-1.11167	-1.05151	-1.61815	-1.42617	-0.84755	-1.64298
206893_at	NM_002968	6299	SALL1	sal-like 1 (Drosophila)	1.07181	1.32837	1.16483	1.44532	1.14455	0.944442	0.875606	0.750068	0.470157	-0.458965	-0.627845	-0.522657	-0.845815	-1.27327	-1.09565	-1.41035	-1.3605	-1.6001
201578_at	NM_005397	5420	PODXL	podocalyxin-like	1.75602	1.76594	1.62213	0.83716	0.867332	0.67606	0.611079	0.337159	0.26007	-0.367855	-0.469999	-0.666876	-0.929659	-1.24877	-1.05572	-1.38794	-1.23064	-1.37549
206424_at	NM_000783	1592	CYP26A1	cytochrome P450, family 26, subfamily A, polypeptide 1	1.8992	1.94932	1.9275	1.14303	1.11575	0.363718	0.3474	-0.037502	0.0593666	-0.827519	-0.849608	-0.911666	-1.06576	-1.03605	-1.13464	-1.02872	-0.979675	-0.934153
209189_at	BC004490	2353	FOS	v-fos FBJ murine osteosarcoma viral oncogene homolog	0.754974	1.03598	1.07794	0.738987	1.29377	2.19866	1.57603	-0.20889	-0.00311384	0.635787	-0.842866	-0.46728	-2.1275	-0.692461	-0.755718	-1.49358	-1.44056	-1.28016
217744_s_at	NM_022121	64065	PERP	PERP, TP53 apoptosis effector	1.41237	1.67373	1.55456	1.25195	0.719411	1.05207	0.443597	0.240887	0.396352	-0.751748	-0.905584	-0.598337	-1.04864	-1.03465	-1.14027	-0.9287	-1.13904	-1.19795
202912_at	NM_001124	133	ADM	adrenomedullin	1.13616	1.45497	1.58655	1.04085	0.704885	1.14418	0.56475	-0.201995	0.375944	0.0540137	-0.252951	-0.535491	-0.952773	-0.533918	-1.28049	-1.39145	-1.43422	-1.47901
218186_at	NM_020387	57111	RAB25	RAB25, member RAS oncogene family	1.88177	2.02948	1.84136	0.873433	0.668897	0.741657	-0.0479599	-0.331427	0.0390218	-0.398349	-0.439821	-0.681647	-0.869148	-1.01248	-1.07105	-1.00352	-0.92453	-1.29569
208949_s_at	BC001120	3958	LGALS3	lectin, galactoside-binding, soluble, 3	1.58952	1.74126	1.50054	0.712953	0.570479	0.630273	0.894474	0.277745	0.329157	-0.16352	-1.02093	-0.538975	-1.16502	-1.02915	-0.940598	-0.877857	-1.05472	-1.45565
209008_x_at	U76549	3856	KRT8	keratin 8	0.901904	1.00613	0.783236	1.19301	1.26956	1.09638	0.803298	0.526335	0.460346	0.172828	-0.318232	-0.332196	-1.01229	-1.07613	-1.30095	-1.40398	-1.1733	-1.59595
204338_s_at	NM_005613	5999	RGS4	regulator of G-protein signaling 4	1.52328	1.33377	1.51522	1.48765	1.07458	1.00866	0.192509	0.00382365	0.12828	-0.674438	-0.873728	-0.890482	-0.814737	-1.10609	-1.14328	-0.776093	-0.995502	-0.993424
205524_s_at	NM_001884	1404	HAPLN1	hyaluronan and proteoglycan link protein 1	1.08227	1.22726	1.14896	1.13461	0.957212	0.690873	0.497961	0.507852	0.450206	-0.193498	-0.16399	-0.450082	-0.852686	-0.827112	-1.06168	-1.32493	-1.25733	-1.56589
209047_at	AL518391	358	AQP1	aquaporin 1 (Colton blood group)	1.4207	1.54172	1.42366	0.852392	0.676711	0.943502	0.835892	-0.0747997	0.134227	-0.0972835	-0.714492	-0.416534	-1.01744	-1.16701	-1.30093	-0.884532	-1.09659	-1.05921
217901_at	BF031829	1829	DSG2	desmoglein 2	1.13975	1.22535	1.19401	1.22668	0.928012	0.577856	0.786	0.498148	0.382511	-0.111264	-0.878355	-0.581939	-0.67979	-1.09269	-0.850129	-1.39423	-1.10988	-1.26004
208474_at	NM_021195	9074	CLDN6	claudin 6	1.30119	1.38539	1.52788	0.938805	0.886447	0.946243	0.240602	0.19241	0.122533	-0.323599	-0.355456	-0.5195	-1.09232	-0.849679	-1.0418	-0.951274	-0.925209	-1.48266
201037_at	NM_002627	5214	PFKP	phosphofructokinase, platelet	0.736944	0.953403	0.885464	1.10528	1.04537	0.962355	0.52704	0.369121	0.827758	0.179793	0.0179881	-0.440676	-0.961498	-0.768679	-1.20505	-1.48515	-1.33814	-1.41132
212812_at	AI700633	256987	SERINC5	serine incorporator 5	1.10617	1.18271	1.29058	0.972126	0.618525	0.690013	0.774951	0.432093	0.480242	-0.0913787	-0.4693	-0.589072	-0.73599	-1.23478	-1.09802	-1.00535	-1.08697	-1.23655
210002_at	D87811	2627	GATA6	GATA binding protein 6	1.09738	1.1979	1.2072	0.96215	0.489213	0.907154	0.630245	0.513321	0.175213	-0.120698	-0.421873	-0.199415	-0.479536	-1.48208	-0.75632	-1.3128	-1.15961	-1.24745
221340_at	NM_005193	1046	CDX4	caudal type homeobox 4	0.769306	1.2265	0.939203	1.75772	1.19058	0.997684	0.379827	0.358249	0.114652	-0.49248	-0.721534	-0.917829	-0.752634	-0.88744	-0.790441	-1.08032	-0.96642	-1.12462
205044_at	NM_014211	2568	GABRP	gamma-aminobutyric acid (GABA) A receptor, pi	1.10962	1.34311	1.26203	0.788163	0.791766	0.943497	0.824644	-0.0148646	0.0349391	-0.392146	-0.544665	-0.476625	-0.918644	-0.626279	-1.15484	-0.974444	-0.833541	-1.16172
207717_s_at	NM_004572	5318	PKP2	plakophilin 2	0.692839	0.748478	0.791851	1.27267	0.686477	0.820491	1.0379	0.70831	0.511556	-0.185356	-0.169118	-0.3721	-0.799536	-1.09978	-1.01642	-1.22809	-1.23166	-1.16851
221245_s_at	NM_030804	NaN	NA	NA	1.33983	1.30304	1.32077	1.11306	0.624594	0.809272	0.155704	0.108218	0.11143	-0.657019	-0.602625	-0.146016	-0.86345	-0.922087	-0.775085	-0.922067	-0.826376	-1.17119
200606_at	NM_004415	1832	DSP	desmoplakin	0.866541	0.9854	0.925887	0.899557	0.646975	0.432309	0.69148	0.638137	0.570681	0.071571	-0.0910482	-0.314112	-0.688796	-0.991458	-0.837764	-1.25903	-1.12239	-1.42394
207542_s_at	NM_000385	358	AQP1	aquaporin 1 (Colton blood group)	1.294	1.28117	1.25057	0.618274	0.58725	0.736368	0.549917	0.0770511	0.0295317	0.123824	-0.635961	-0.591563	-0.753265	-0.520823	-0.629923	-1.27842	-0.98262	-1.15539
206001_at	NM_000905	4852	NPY	neuropeptide Y	0.952744	0.512299	0.73274	1.68684	1.13972	0.986	0.596957	0.448237	0.0640208	-0.256181	-0.673396	-0.59478	-0.892232	-0.918933	-0.863215	-1.10685	-0.816268	-0.9977
203962_s_at	NM_006393	10529	NEBL	nebulette	0.634209	0.669227	0.601873	1.18211	1.10559	0.461966	0.74863	0.510818	0.471294	0.10804	-0.00623235	-0.00823608	-0.857048	-0.556526	-1.17925	-1.1598	-1.37965	-1.34701
204114_at	NM_007361	22795	NID2	nidogen 2 (osteonidogen)	0.796447	0.930989	0.975644	1.01056	0.694897	0.827847	0.653028	0.555751	0.317182	-0.137762	-0.490725	-0.444633	-0.855498	-0.977815	-0.903746	-0.892348	-1.02743	-1.03238
209723_at	BC002538	5272	SERPINB9	serpin peptidase inhibitor, clade B (ovalbumin), member 9	1.01017	1.31809	1.30314	0.836081	0.528663	0.790651	0.320945	0.0679993	0.325829	-0.305825	-0.344133	-0.607431	-0.739003	-0.916557	-0.732899	-1.08628	-0.799217	-0.970216
205559_s_at	NM_006200	5125	PCSK5	proprotein convertase subtilisin/kexin type 5	0.611897	1.23807	0.831447	1.19479	0.398708	0.799234	0.69215	0.400356	0.495176	-0.22932	-0.644671	-0.242493	-0.693199	-0.631496	-0.917909	-1.15344	-1.1962	-0.9531
201849_at	NM_004052	664	BNIP3	BCL2/adenovirus E1B 19kDa interacting protein 3	0.830282	0.794296	0.716761	0.910881	0.50456	0.844699	0.461361	0.0677892	0.982885	0.339771	0.0371262	-0.374133	-0.973878	-0.316473	-0.809777	-1.32996	-1.30924	-1.37695
203946_s_at	U75667	384	ARG2	arginase, type II	1.1586	1.1333	1.17329	0.865688	0.517166	0.841114	0.484643	0.295296	-0.0238791	-0.477679	-0.355757	-0.257059	-0.971409	-0.760878	-0.980496	-0.90701	-0.638096	-1.09683
221664_s_at	AF154005	50848	F11R	F11 receptor	1.20842	1.46741	1.3782	0.775656	0.603342	0.739019	0.151504	0.00624973	0.0360857	-0.232414	-0.748992	-0.40845	-1.27683	-0.670403	-0.800269	-0.907716	-0.741823	-0.57898
200872_at	NM_002966	6281	S100A10	S100 calcium binding protein A10	1.25137	1.54108	1.49489	0.727837	0.414595	0.706129	0.174016	-0.135285	0.0871833	-0.160567	-0.636052	-0.619874	-0.778881	-0.974411	-1.13402	-0.620793	-0.632734	-0.70449
201061_s_at	M81635	2040	STOM	stomatin	1.21617	1.42889	1.32491	0.9346	0.529167	0.816239	0.0941734	-0.00067459	0.00572285	-0.424237	-0.648852	-0.611392	-0.635922	-0.804189	-0.788464	-0.587985	-0.98247	-0.865692
207345_at	NM_006350	10468	FST	follistatin	1.16029	1.27562	1.44902	0.68929	0.359095	0.452282	0.127527	0.124284	0.30683	-0.00675435	-0.335286	-0.206673	-0.76152	-0.997328	-0.917173	-0.861912	-0.909194	-0.948398
201848_s_at	U15174	664	BNIP3	BCL2/adenovirus E1B 19kDa interacting protein 3	0.822786	0.667213	0.771085	1.06767	0.5643	0.8851	0.422118	0.0559119	0.839343	0.331282	-0.0858882	-0.475511	-0.902571	-0.492478	-1.00277	-1.19088	-1.0283	-1.24841
201060_x_at	AI537887	2040	STOM	stomatin	1.08739	1.48725	1.32108	1.02364	0.373612	0.649292	0.160468	0.0315774	-0.0782893	-0.302427	-0.550136	-0.473263	-0.65108	-0.729974	-0.799847	-0.832912	-0.84524	-0.871138
219768_at	NM_024626	79679	VTCN1	V-set domain containing T cell activation inhibitor 1	1.36924	1.36043	1.31463	0.703171	0.387138	0.455646	0.425934	0.0257777	0.0223325	-0.0909057	-0.890781	-0.66257	-0.778722	-0.59971	-0.530597	-0.672001	-1.01336	-0.825661
209357_at	AF109161	10370	CITED2	Cbp/p300-interacting transactivator, with Glu/Asp-rich carboxy-terminal domain, 2	1.14706	1.1381	1.06571	0.858519	0.444315	0.771258	0.596937	0.165717	-0.0403074	-0.390146	-0.688638	-0.146895	-0.922987	-0.897991	-0.505771	-0.604365	-1.10587	-0.884638
201641_at	NM_004335	684	BST2	bone marrow stromal cell antigen 2	0.400861	0.825723	0.826459	0.785876	0.9072	0.704618	0.465256	0.5581	0.593253	0.186033	-0.205028	-0.303646	-0.943322	-0.811995	-0.745388	-1.03539	-1.00857	-1.20005
201250_s_at	NM_006516	6513	SLC2A1	solute carrier family 2 (facilitated glucose transporter), member 1	1.01422	0.834655	0.9999	0.690126	0.505784	0.577099	0.392795	0.0933874	0.5242	0.300302	-0.193348	-0.347134	-0.667857	-0.344932	-1.06322	-1.03886	-0.977082	-1.30003
204751_x_at	NM_004949	1824	DSC2	desmocollin 2	0.784888	1.1571	0.748428	0.8051	0.464336	0.564448	0.932111	0.285317	0.391343	-0.0747453	-0.506666	-0.219423	-0.716562	-1.13337	-0.666383	-0.960588	-0.913802	-0.941534
222108_at	AC004010	347902	AMIGO2	adhesion molecule with Ig-like domain 2	0.872818	1.31928	0.954666	1.01026	0.661247	0.733237	0.468516	-0.00142952	0.161989	-0.37197	-0.549229	-0.770579	-0.622922	-0.705265	-0.87319	-0.627093	-0.749412	-0.910919
201798_s_at	NM_013451	26509	FER1L3	fer-1-like 3, myoferlin (C. elegans)	0.804137	1.05633	1.37998	0.659134	0.535099	0.473532	0.379911	0.366027	0.306829	-0.0213225	-0.437501	-0.678889	-0.548135	-0.672244	-1.12275	-0.917573	-0.653785	-0.908779
213661_at	AI671186	25891	DKFZP586H2123	regeneration associated muscle protease	0.983875	0.935272	0.901122	1.23851	0.706609	0.887979	0.0994624	0.192055	0.097607	-0.359604	-0.424392	-0.514043	-0.622755	-0.829043	-1.07509	-0.673667	-0.809334	-0.734572
212560_at	AV728268	6653	SORL1	sortilin-related receptor, L(DLR class) A repeats-containing	1.11867	1.03427	1.12429	0.74982	0.788665	0.61576	0.198899	0.137881	0.281265	-0.0344088	-0.497771	-0.769881	-0.868487	-1.06006	-0.895542	-0.569138	-0.749604	-0.604627
213592_at	X89271	187	AGTRL1	angiotensin II receptor-like 1	1.20247	1.19712	1.27841	0.94263	0.716001	0.531744	0.119998	0.0844512	-0.19315	-0.392036	-0.472472	-0.693919	-0.848492	-0.799671	-0.785112	-0.663064	-0.518024	-0.706878
202934_at	AI761561	3099	HK2	hexokinase 2	0.563998	0.377248	0.461539	0.825208	0.690506	0.672558	0.723211	0.395591	0.928788	0.201069	-0.0453372	0.0675566	-0.842482	-0.2872	-0.898912	-1.61839	-1.06008	-1.15487
209487_at	D84109	11030	RBPMS	RNA binding protein with multiple splicing	1.3995	1.19702	1.20798	0.547032	0.304645	0.418214	0.363589	-0.0835697	0.0224175	-0.0427317	-0.648237	-0.128447	-0.733378	-0.586867	-0.600078	-0.621295	-1.25512	-0.76068
205290_s_at	NM_001200	650	BMP2	bone morphogenetic protein 2	0.970357	1.50959	1.08044	1.07207	0.282445	0.452691	0.457562	0.00137165	0.0794088	-0.394635	-0.691799	-0.584614	-0.747535	-0.939672	-0.743548	-0.533216	-0.553321	-0.717589
209602_s_at	AI796169	2625	GATA3	GATA binding protein 3	1.06906	1.42472	1.17194	0.552721	0.385164	0.577991	0.331711	0.0317555	-0.112144	-0.190939	-0.583697	-0.319009	-0.374583	-0.878434	-0.496864	-1.00008	-0.724046	-0.865262
201349_at	NM_004252	9368	SLC9A3R1	solute carrier family 9 (sodium/hydrogen exchanger), member 3 regulator 1	1.0541	1.17563	1.14553	0.61243	0.808702	0.571859	0.241823	0.00963026	-0.00513814	-0.428668	-0.375677	-0.507838	-0.536059	-0.468957	-0.730909	-0.936264	-0.753074	-0.877118
202525_at	NM_002773	5652	PRSS8	protease, serine, 8	0.939193	0.922941	0.858418	0.912104	0.745691	0.601584	0.38663	0.103538	0.193008	-0.324382	-0.35538	-0.480039	-0.581117	-0.450049	-0.793373	-1.06853	-0.81839	-0.791851
209071_s_at	AF159570	8490	RGS5	regulator of G-protein signaling 5	0.891195	1.03147	1.00736	0.778854	0.517692	0.412612	0.405691	0.272449	0.219031	-0.188015	-0.39806	-0.395308	-0.658483	-0.739294	-0.70128	-0.721803	-0.801754	-0.932363
202464_s_at	NM_004566	5209	PFKFB3	6-phosphofructo-2-kinase/fructose-2,6-biphosphatase 3	0.689834	0.550627	0.593934	0.806277	0.519708	0.881688	0.757806	0.200816	0.563106	0.0550758	-0.260321	-0.21182	-0.803221	-0.542604	-0.697294	-0.985847	-1.22318	-0.894589
214154_s_at	AA888057	5318	PKP2	plakophilin 2	0.871953	0.654076	0.584817	0.754576	0.891333	0.634115	0.498101	0.419738	0.359953	-0.0925111	-0.21747	-0.414315	-0.712362	-0.692333	-0.912759	-0.889801	-0.88351	-0.853599
207543_s_at	NM_000917	5033	P4HA1	procollagen-proline, 2-oxoglutarate 4-dioxygenase (proline 4-hydroxylase), alpha polypeptide I	0.666165	0.656733	0.712617	0.675255	0.582125	0.59967	0.450473	-0.0244777	0.689557	0.476734	-0.0524996	-0.124832	-0.724394	-0.421155	-0.841686	-1.2265	-0.935903	-1.15789
217356_s_at	S81916	5230	PGK1	phosphoglycerate kinase 1	0.674709	0.851178	0.590975	0.948642	0.568634	0.664649	0.327414	-0.107321	0.588996	0.331468	-0.0771688	-0.361539	-0.828518	-0.569756	-0.617755	-0.919939	-0.970155	-1.09451
204339_s_at	BC000737	5999	RGS4	regulator of G-protein signaling 4	1.08969	0.980523	0.914303	0.941856	0.69841	0.73277	0.155777	0.0949135	-0.0654486	-0.212956	-0.463066	-0.794838	-0.536238	-0.719455	-0.750366	-0.72365	-0.698112	-0.644112
215726_s_at	M22976	1528	CYB5A	cytochrome b5 type A (microsomal)	1.16313	1.26348	1.19678	0.587271	0.340243	0.585312	0.236979	0.0852776	0.150582	-0.437729	-0.807523	-0.329868	-0.609147	-0.90996	-0.65242	-0.543559	-0.684937	-0.633918
213652_at	AU152579	5125	PCSK5	proprotein convertase subtilisin/kexin type 5	0.573064	0.743451	0.851066	1.02008	0.748789	0.440333	0.43567	0.141278	0.34399	-0.109309	-0.185236	-0.195409	-0.602817	-0.778044	-0.825128	-0.894826	-0.866047	-0.8409
202207_at	BG435404	10123	ARL4C	ADP-ribosylation factor-like 4C	0.389637	0.462202	0.450887	0.956662	0.686482	0.835679	0.760921	0.450466	0.425127	0.180801	-0.280039	-0.040394	-0.556304	-0.956654	-0.706983	-0.970973	-1.13228	-0.955233
36711_at	AL021977	23764	MAFF	v-maf musculoaponeurotic fibrosarcoma oncogene homolog F (avian)	0.507115	1.01501	1.06046	0.665202	0.0832904	1.73302	0.4909	-0.14614	0.0585431	-0.00610301	-0.693149	-0.419039	-0.757255	-0.669097	-0.616804	-0.801827	-0.727962	-0.776164
203739_at	NM_006526	7764	ZNF217	zinc finger protein 217	0.913155	1.19377	0.952265	0.636919	0.340672	0.399203	0.299243	0.231797	0.236365	-0.37496	-0.0986912	-0.366612	-0.424634	-1.05336	-0.514389	-0.656195	-0.773458	-0.941096
219474_at	NM_024616	79669	C3orf52	chromosome 3 open reading frame 52	0.310293	0.503823	0.298692	1.93571	1.12199	0.62751	0.320004	0.40637	0.0159335	-0.334342	-0.362516	-0.487329	-0.654272	-0.60998	-0.536534	-0.828332	-0.796133	-0.930891
201012_at	NM_000700	301	ANXA1	annexin A1	0.994343	1.05059	0.973712	0.657391	0.381384	0.340511	0.582669	0.232035	0.176364	-0.0880257	-0.517053	-0.628592	-0.752059	-0.706385	-0.589476	-0.793625	-0.654676	-0.659104
203304_at	NM_012342	25805	BAMBI	BMP and activin membrane-bound inhibitor homolog (Xenopus laevis)	0.783586	0.79413	0.824823	0.782524	0.811061	0.696707	0.393335	0.179135	0.170306	-0.377438	-0.281891	-0.404675	-0.736006	-0.77524	-0.774818	-0.603764	-0.61477	-0.867005
209735_at	AF098951	9429	ABCG2	ATP-binding cassette, sub-family G (WHITE), member 2	0.916415	0.732082	0.547608	1.00589	0.524271	0.728408	0.476025	0.28566	0.0710615	-0.248293	-0.212775	-0.312225	-0.738392	-0.713162	-0.70435	-0.96237	-0.617159	-0.778692
210512_s_at	AF022375	7422	VEGFA	vascular endothelial growth factor A	0.244535	0.482285	0.548307	0.857188	0.622096	0.533413	0.774596	0.339396	0.621228	0.239619	0.0771788	-0.184718	-0.516669	-0.724495	-0.661852	-1.25077	-0.912729	-1.08861
207980_s_at	NM_006079	10370	CITED2	Cbp/p300-interacting transactivator, with Glu/Asp-rich carboxy-terminal domain, 2	0.733318	0.977591	0.928331	0.727352	0.532444	0.636136	0.483729	0.177462	-0.0559469	-0.185399	-0.541428	-0.243624	-0.503656	-0.79137	-0.520423	-0.750023	-0.789183	-0.815311
200737_at	NM_000291	5230	PGK1	phosphoglycerate kinase 1	0.489648	0.752369	0.636093	0.907796	0.582204	0.657176	0.285313	-0.0409734	0.68176	0.237485	0.0041284	-0.31922	-0.948156	-0.526641	-0.809137	-0.882448	-0.749788	-0.957609
209604_s_at	BC003070	2625	GATA3	GATA binding protein 3	1.09886	0.869823	1.16172	0.594374	0.539352	0.24147	0.391171	0.160791	0.0452568	-0.451909	-0.388446	-0.206018	-0.62558	-0.544149	-0.636504	-0.599301	-0.762921	-0.88798
208190_s_at	NM_015925	51599	LSR	lipolysis stimulated lipoprotein receptor	0.542107	1.06213	0.696468	0.807597	0.550014	0.684386	0.428663	0.272386	0.167242	-0.204785	-0.283387	-0.373919	-0.905359	-0.541547	-0.573152	-0.824756	-0.769434	-0.734659
217739_s_at	NM_005746	10135	NAMPT	nicotinamide phosphoribosyltransferase	0.393276	1.12604	0.679825	0.872541	0.319643	0.453826	0.488809	-0.0242885	0.765399	0.0351523	-0.416825	-0.142368	-0.668916	-0.557356	-0.720282	-0.85897	-0.75923	-0.986275
204348_s_at	NM_013410	205	AK3L1	adenylate kinase 3-like 1	0.880693	0.643668	0.933512	0.943971	0.530382	0.549778	0.1928	-0.0489364	0.391672	0.0586657	-0.312488	-0.49137	-0.689855	-0.483001	-0.832003	-0.796677	-0.771076	-0.699736
202071_at	NM_002999	6385	SDC4	syndecan 4	1.15235	1.13011	1.0633	0.512074	0.324198	0.526529	0.186178	-0.096014	0.12443	-0.151439	-0.349879	-0.37864	-0.773203	-0.532538	-0.76442	-0.599738	-0.599798	-0.773503
209691_s_at	BC003541	55715	DOK4	docking protein 4	0.611009	0.618058	0.623326	0.62357	0.711772	0.646215	0.531151	0.423705	0.366267	-0.143385	-0.0391591	-0.167951	-0.694383	-0.899388	-0.775023	-0.839933	-0.763893	-0.831958
202672_s_at	NM_001674	467	ATF3	activating transcription factor 3	0.195275	0.58406	0.493713	0.675188	0.474837	1.05513	1.10183	0.346255	0.107542	0.396612	-0.357677	-0.216146	-0.698147	-0.724143	-0.765444	-0.648463	-1.03182	-0.988599
201170_s_at	NM_003670	8553	BHLHB2	basic helix-loop-helix domain containing, class B, 2	0.448648	0.492713	0.34378	0.865355	0.521662	0.737383	0.767308	0.245046	0.563504	0.409551	-0.490424	-0.178819	-0.546653	-0.599832	-0.738619	-0.916871	-0.910556	-1.01317
209070_s_at	AI183997	8490	RGS5	regulator of G-protein signaling 5	0.755622	0.928013	0.853096	0.754636	0.583552	0.409884	0.239398	0.229777	-0.0580697	-0.0451586	-0.232741	-0.376493	-0.556634	-0.329642	-0.766178	-0.991382	-0.769372	-0.628306
205560_at	NM_006200	5125	PCSK5	proprotein convertase subtilisin/kexin type 5	0.533475	0.580898	0.399849	0.908333	0.67312	0.788902	0.546391	0.451858	0.360017	-0.11305	-0.352873	-0.213129	-0.658214	-0.902728	-0.850826	-0.638183	-0.704982	-0.808858
218507_at	NM_013332	29923	HIG2	hypoxia-inducible protein 2	0.746133	0.661706	0.637639	0.823767	0.431972	0.663178	0.442511	0.250136	0.133565	-0.150795	-0.0964911	-0.399711	-0.447544	-0.45166	-0.746589	-0.864844	-0.730596	-0.902377
213992_at	AI889941	1288	COL4A6	collagen, type IV, alpha 6	0.744594	0.745588	1.01661	0.667919	0.492102	0.424604	0.252416	0.266541	0.225816	-0.241979	-0.259583	-0.459584	-0.455798	-0.53618	-0.502484	-0.806787	-0.832204	-0.741589
203961_at	AL157398	10529	NEBL	nebulette	0.447169	0.541283	0.42923	0.982375	0.637095	0.36689	0.449332	0.426705	0.223847	0.0568692	0.0802751	0.0132357	-0.250784	-0.738731	-0.64951	-0.992397	-0.957498	-1.06539
209488_s_at	D84109	11030	RBPMS	RNA binding protein with multiple splicing	0.841469	0.640944	0.734458	0.678665	0.597194	0.565487	0.325418	0.142937	0.11553	-0.129652	-0.323641	-0.162495	-0.531743	-0.577856	-0.713649	-0.699254	-0.73839	-0.765422
204597_x_at	NM_003155	6781	STC1	stanniocalcin 1	0.46798	0.455664	0.504198	0.998198	0.29178	0.798826	0.405658	0.0225612	0.661441	0.121534	-0.246154	-0.240522	-0.517957	-0.162282	-0.625227	-0.984519	-0.961288	-0.989889
201761_at	NM_006636	10797	MTHFD2	methylenetetrahydrofolate dehydrogenase (NADP+ dependent) 2, methenyltetrahydrofolate cyclohydrolase	0.486655	0.591815	0.640626	0.625793	0.316226	0.475984	0.525986	0.0578538	0.171982	0.471295	-0.235591	0.192328	-0.591789	-0.767587	-0.310101	-1.07441	-0.973256	-0.603806
219955_at	NM_019079	54596	L1TD1	LINE-1 type transposase domain containing 1	1.61802	1.82567	1.92955	1.04004	0.723638	-0.11585	0.123495	-0.297329	-0.519078	-0.672237	-0.571031	-0.482879	-0.527955	-0.79878	-0.978563	-0.72086	-0.734987	-0.840858
219121_s_at	NM_017697	54845	RBM35A	RNA binding motif protein 35A	1.56402	1.80534	1.9133	0.370317	0.170854	0.312966	0.120001	0.10803	0.041782	-0.262048	-0.536059	-0.73079	-0.857816	-0.500755	-0.780505	-0.867322	-0.861202	-1.01012
206291_at	NM_006183	4922	NTS	neurotensin	2.29818	2.45652	2.51566	0.58506	0.171028	-0.0942947	-0.598251	-1.01911	-1.03886	-0.880403	-0.584828	-0.74658	-0.55647	-0.530964	-0.399704	-0.414133	-0.603694	-0.559172
210265_x_at	AF268617	642559	POU5F1P3	POU class 5 homeobox 1 pseudogene 3	2.32177	2.40182	2.08231	-0.0906595	-0.0363477	-0.0829627	-0.500246	-0.41237	-0.487018	-0.534037	-0.294803	-0.530762	-0.523743	-0.731212	-0.510387	-0.655594	-0.814008	-0.601756
203382_s_at	NM_000041	348	APOE	apolipoprotein E	1.44749	1.62581	1.47516	0.750747	0.699741	0.545743	0.230638	-0.139077	-0.0887475	-0.80233	-1.11302	-1.17769	-1.00022	-0.99867	-0.850977	-0.107272	-0.268658	-0.228677
218035_s_at	NM_019027	54502	RBM47	RNA binding motif protein 47	1.49908	1.35804	1.59874	0.502982	0.483074	0.245722	0.109082	-0.201943	-0.0313173	-0.393912	-0.586639	-0.812667	-0.685742	-0.446753	-0.576114	-0.555729	-0.763544	-0.742353
203381_s_at	N33009	348	APOE	apolipoprotein E	1.4931	1.52728	1.54766	0.671253	0.613761	0.591479	0.252361	-0.295821	-0.106921	-0.649511	-1.11128	-1.11398	-1.06012	-1.06412	-1.05648	0.005237	-0.0799216	-0.163974
205289_at	AA583044	650	BMP2	bone morphogenetic protein 2	1.85477	1.43728	1.60671	0.195517	0.19231	0.130055	0.0757554	-0.317653	-0.183343	-0.448933	-0.269437	-0.384161	-0.602339	-0.551277	-0.622698	-0.637745	-0.840813	-0.633997
210905_x_at	AF268613	645682	POU5F1P4	POU class 5 homeobox 1 pseudogene 4	1.97643	2.06193	2.11387	-0.00472397	0.0900257	-0.140379	-0.467003	-0.417195	-0.445121	-0.508552	-0.617921	-0.409072	-0.643641	-0.394095	-0.60051	-0.484677	-0.582226	-0.527147
206432_at	NM_005328	3037	HAS2	hyaluronan synthase 2	1.19848	1.29905	1.40745	0.806305	-0.00479423	-0.0260077	0.194638	-0.102111	-0.0284315	-0.346576	-0.0576437	-0.217071	-0.251186	-0.694684	-0.478326	-0.97449	-0.734577	-0.990028
208286_x_at	NM_002701	5460	POU5F1	POU class 5 homeobox 1	1.71006	2.1978	1.96569	-0.027596	0.0566095	-0.339848	-0.405775	-0.33546	-0.425073	-0.314788	-0.366278	-0.589805	-0.610648	-0.343369	-0.382453	-0.416103	-0.833729	-0.539242
204298_s_at	NM_002317	4015	LOX	lysyl oxidase	1.16853	1.65607	1.4078	0.0287883	0.265673	0.271954	0.32222	-0.458656	0.00567746	0.000883478	-0.475599	-0.258271	-0.857522	-0.353313	-0.699913	-0.777619	-0.595373	-0.65134
202234_s_at	BF511091	6566	SLC16A1	solute carrier family 16, member 1 (monocarboxylic acid transporter 1)	0.820019	1.14127	1.38487	0.665848	-0.0317801	0.382091	0.419123	0.106734	-0.133708	-0.204399	-0.189889	-0.170311	-0.486068	-0.508845	-0.720511	-0.877449	-0.712826	-0.884168
201130_s_at	L08599	999	CDH1	cadherin 1, type 1, E-cadherin (epithelial)	1.20578	1.44564	1.36569	0.671722	0.112548	0.232076	-0.0795955	0.0313863	-0.144812	-0.248412	-0.384524	-0.556903	-0.645779	-0.607971	-0.467829	-0.51063	-0.670029	-0.748366
202546_at	NM_003761	8673	VAMP8	vesicle-associated membrane protein 8 (endobrevin)	1.41234	1.32761	1.15999	0.664897	0.248394	0.563745	0.0574395	-0.024338	-0.0950206	-0.668472	-0.548478	-0.473679	-0.589295	-1.02273	-0.787946	-0.323046	-0.447506	-0.453909
205278_at	NM_000817	2571	GAD1	glutamate decarboxylase 1 (brain, 67kDa)	1.49264	1.5314	1.48292	0.887102	0.209071	0.122218	-0.312858	-0.334742	-0.268025	-0.491172	-0.619735	-0.569048	-0.604319	-0.460135	-0.621445	-0.508851	-0.600145	-0.334876
208966_x_at	AF208043	3428	IFI16	interferon, gamma-inducible protein 16	1.04116	0.968308	0.81547	1.40234	0.875466	0.163162	0.175138	-0.125345	-0.534907	-0.172642	-0.467465	-0.283164	-1.04344	-0.480167	-0.79924	-0.697431	-0.424717	-0.412529
206524_at	NM_003181	6862	T	T, brachyury homolog (mouse)	1.07698	1.27934	1.14203	0.401757	0.531612	0.0869614	0.186054	0.243867	0.0631465	-0.194212	-0.425672	-0.464841	-0.640618	-0.603688	-0.950555	-0.601481	-0.490133	-0.640545
204948_s_at	NM_013409	10468	FST	follistatin	1.14091	0.98296	1.03379	0.600843	0.282674	0.255263	0.126012	0.25975	0.186582	-0.0460492	-0.329742	-0.34442	-0.659242	-0.578422	-0.787081	-0.800732	-0.785572	-0.537518
218195_at	NM_024573	79624	C6orf211	chromosome 6 open reading frame 211	0.878418	1.17772	1.1605	0.662895	0.448927	0.422648	0.423702	-0.0434688	-0.0475435	-0.48807	-0.541435	-0.184506	-0.487223	-0.8518	-0.815187	-0.575636	-0.519661	-0.620283
208690_s_at	BC000915	9124	PDLIM1	PDZ and LIM domain 1 (elfin)	0.930217	0.941769	0.840503	0.750419	0.516516	0.569978	0.139261	0.134931	0.164008	-0.0543456	-0.395411	-0.416463	-0.754585	-0.710805	-0.662098	-0.59865	-0.557119	-0.838126
208456_s_at	NM_012250	22800	RRAS2	related RAS viral (r-ras) oncogene homolog 2	1.24248	1.0616	1.01803	0.564974	0.345512	0.48854	0.352639	-0.395761	-0.165195	-0.112002	-0.255049	-0.0712013	-0.662483	-0.775997	-0.665977	-0.737332	-0.572236	-0.660542
206387_at	U51096	1045	CDX2	caudal type homeobox 2	1.05114	0.840722	0.782946	0.991349	0.754976	0.429133	0.204384	0.0783558	-0.0905422	-0.229479	-0.714296	-0.438183	-0.672865	-0.290044	-0.617104	-0.568636	-0.757478	-0.754378
205505_at	NM_001490	2650	GCNT1	glucosaminyl (N-acetyl) transferase 1, core 2 (beta-1,6-N-acetylglucosaminyltransferase)	0.678166	1.17781	1.08294	0.732671	0.572487	0.199385	0.290692	-0.0541047	0.0202529	-0.192464	-0.496485	-0.220296	-0.64217	-0.461937	-0.501035	-0.678732	-0.755869	-0.751313
206209_s_at	NM_000717	762	CA4	carbonic anhydrase IV	1.54598	1.69568	1.76057	0.0919547	-0.0270095	-0.127837	-0.0982727	-0.213112	-0.236844	-0.385608	-0.317512	-0.542463	-0.620118	-0.401778	-0.397234	-0.614574	-0.564405	-0.547418
216899_s_at	AC003999	8935	SKAP2	src kinase associated phosphoprotein 2	1.29401	1.33872	1.06525	0.738864	0.00660801	0.168512	0.0789076	0.0536782	-0.119252	-0.209639	-0.450826	-0.291721	-0.831756	-0.661347	-0.458789	-0.544862	-0.608225	-0.568131
202085_at	NM_004817	9414	TJP2	tight junction protein 2 (zona occludens 2)	0.831021	1.20847	0.872794	0.799126	0.553401	0.708507	0.105475	0.0722073	-0.0984346	-0.607119	-0.42964	-0.253052	-0.640668	-1.0112	-0.605208	-0.559856	-0.422053	-0.523775
206012_at	NM_003240	7044	LEFTY2	left-right determination factor 2	1.91146	2.00359	2.01847	-0.383851	-0.507382	-0.625466	-0.117516	-0.242897	0.139953	-0.241579	-0.519798	-0.40346	-0.528518	-0.423701	-0.379786	-0.524457	-0.636603	-0.538462
206286_s_at	NM_003212	6997	TDGF1	teratocarcinoma-derived growth factor 1	1.66042	2.68055	2.52063	-0.696819	-0.503335	-0.441824	-0.532985	-0.394882	-0.560347	-0.237498	-0.435917	-0.47392	-0.42334	-0.272667	-0.414268	-0.49986	-0.502604	-0.471337
216604_s_at	AL365343	23428	SLC7A8	solute carrier family 7 (cationic amino acid transporter, y+ system), member 8	0.90265	1.27502	1.00772	0.620843	0.64455	0.405028	0.290947	0.0061416	-0.2387	-0.313046	-0.700154	-0.670633	-0.421818	-0.403978	-0.630005	-0.565633	-0.637315	-0.57162
217234_s_at	AF199015	7430	EZR	ezrin	0.912703	0.96656	0.930901	0.621099	0.350188	0.532799	0.289583	0.103484	-0.00745485	-0.217121	-0.298427	-0.306459	-0.485318	-0.691353	-0.63373	-0.646667	-0.617148	-0.803637
205387_s_at	NM_000737	1082	CGB	chorionic gonadotropin, beta polypeptide	1.31516	1.63483	0.839053	0.0249028	-0.171793	0.403931	-0.232257	-0.022934	1.33275	-0.872444	0.0436915	-0.348153	-0.766704	-0.9036	-0.587948	-0.364784	-0.72658	-0.59712
213664_at	AW235061	6505	SLC1A1	solute carrier family 1 (neuronal/epithelial high affinity glutamate transporter, system Xag), member 1	0.565397	0.940986	0.808982	1.04291	0.678349	0.476875	0.330978	0.044571	0.106251	-0.302919	-0.356871	-0.660333	-0.939038	-0.581382	-0.507012	-0.677498	-0.545323	-0.424924
214532_x_at	AF268615	5462	POU5F1P1	POU class 5 homeobox 1 pseudogene 1	1.66184	1.77388	1.67996	-0.0148304	0.179572	-0.240991	-0.339019	-0.516307	-0.258694	-0.1539	-0.29677	-0.479539	-0.429087	-0.438081	-0.519082	-0.513617	-0.77156	-0.323767
220668_s_at	NM_006892	1789	DNMT3B	DNA (cytosine-5-)-methyltransferase 3 beta	1.27749	1.21443	1.34017	0.326388	0.240185	0.350195	0.0495585	0.0348075	-0.326722	-0.44359	-0.329873	-0.467197	-0.319198	-0.64463	-0.479551	-0.61787	-0.604652	-0.599941
210087_s_at	AF095727	9019	MPZL1	myelin protein zero-like 1	0.787148	1.0768	0.879896	0.700331	0.306445	0.663552	0.142069	0.205728	-0.095948	-0.196938	-0.699621	-0.210077	-0.301469	-0.584526	-0.608783	-0.717937	-0.620426	-0.726248
207836_s_at	NM_006867	11030	RBPMS	RNA binding protein with multiple splicing	0.75087	0.738281	0.586844	0.577367	0.468761	0.472053	0.598803	0.235494	0.290535	-0.133378	-0.204083	-0.390787	-0.506057	-0.494335	-0.35787	-0.805093	-1.01458	-0.812819
213355_at	AI989567	10402	ST3GAL6	ST3 beta-galactoside alpha-2,3-sialyltransferase 6	0.903833	0.370505	1.52426	0.738823	0.338378	0.679368	0.115114	-0.0197989	-0.0508065	-0.370759	-0.317934	-0.31131	-0.452444	-0.677943	-0.488392	-0.882296	-0.583554	-0.515045
209900_s_at	AL162079	6566	SLC16A1	solute carrier family 16, member 1 (monocarboxylic acid transporter 1)	0.85768	1.1076	0.991511	0.542457	0.27702	0.35358	0.211912	0.0804571	-0.13705	-0.161918	-0.411344	0.0101741	-0.393524	-0.673343	-0.314305	-0.898904	-0.7049	-0.737099
207558_s_at	NM_000325	5308	PITX2	paired-like homeodomain 2	1.13348	1.14512	0.99012	0.427294	0.104894	0.628735	0.535312	0.0577345	-0.087902	-0.602772	-0.478187	-0.396783	-0.598292	-0.806497	-0.651995	-0.510753	-0.414757	-0.474755
211986_at	BG287862	79026	AHNAK	AHNAK nucleoprotein	0.66888	0.737793	0.911064	0.738997	0.606206	0.477307	0.333251	0.280357	0.222219	-0.204666	-0.492402	-0.549958	-0.606163	-0.627196	-0.860296	-0.615708	-0.446078	-0.573606
214146_s_at	R64130	5473	PPBP	pro-platelet basic protein (chemokine (C-X-C motif) ligand 7)	1.37142	1.45459	1.40254	0.802483	0.624774	0.87578	-0.276581	-1.60552	-0.491987	-0.351372	-0.819166	-0.691332	-0.338075	-0.698134	-0.460575	-0.307081	-0.268693	-0.22308
211864_s_at	AF207990	26509	FER1L3	fer-1-like 3, myoferlin (C. elegans)	0.696287	0.832904	0.992743	0.506936	0.53017	0.767254	0.255761	0.0592835	0.0580257	-0.203897	-0.585618	-0.27354	-0.712919	-0.536042	-0.633451	-0.72483	-0.552447	-0.47662
203455_s_at	NM_002970	6303	SAT1	spermidine/spermine N1-acetyltransferase 1	1.08361	1.21258	1.12558	0.771538	0.0836658	0.636349	0.10823	-0.36902	0.032434	-0.715241	-0.593054	-0.378536	-0.347199	-0.65337	-0.570428	-0.372337	-0.344932	-0.709871
209238_at	BE966922	6809	STX3	syntaxin 3	0.649047	0.870204	0.996373	0.766194	0.507763	0.394987	0.301421	-0.0763376	0.0569765	-0.157211	-0.428244	-0.392801	-0.509388	-0.48895	-0.546523	-0.640209	-0.546841	-0.756459
214397_at	AI827820	8932	MBD2	methyl-CpG binding domain protein 2	1.05992	1.14304	0.848855	0.412514	0.216689	0.425754	-0.0556759	0.104732	-0.0400138	-0.23263	-0.0383123	-0.249297	-0.296086	-0.553844	-0.480311	-1.028	-0.666098	-0.571234
218826_at	NM_017515	54733	SLC35F2	solute carrier family 35, member F2	0.88483	0.661882	0.589029	0.824291	0.666956	0.306916	0.129139	0.3504	0.145031	-0.168513	-0.230746	-0.508574	-0.371975	-0.595727	-0.546674	-0.723273	-0.822163	-0.590829
206670_s_at	NM_013445	2571	GAD1	glutamate decarboxylase 1 (brain, 67kDa)	1.13352	1.87436	1.37243	0.396562	0.036826	-0.155588	-0.32181	-0.23327	-0.119559	-0.342653	-0.218661	-0.53543	-0.520406	-0.390414	-0.468456	-0.471015	-0.484127	-0.552303
203453_at	NM_001038	6337	SCNN1A	sodium channel, nonvoltage-gated 1 alpha	1.55601	1.2969	1.34352	-0.0660587	0.231	0.056881	-0.0937133	-0.290718	-0.0113553	-0.240557	-0.405185	-0.317402	-0.470205	-0.446359	-0.154643	-1.06692	-0.627107	-0.294092
210715_s_at	AF027205	10653	SPINT2	serine peptidase inhibitor, Kunitz type, 2	0.769096	0.876534	0.783485	0.678582	0.50774	0.49767	0.317244	-0.0824961	0.0764478	-0.11616	-0.431849	-0.32144	-0.456993	-0.557726	-0.675837	-0.56658	-0.52311	-0.774609
205286_at	U85658	7022	TFAP2C	transcription factor AP-2 gamma (activating enhancer binding protein 2 gamma)	0.982061	0.992757	1.04969	0.644726	0.066091	0.228536	0.215231	0.0226323	0.120467	-0.156661	-0.553717	-0.266569	-0.468112	-0.552564	-0.314299	-0.83979	-0.598591	-0.571889
220484_at	NM_018298	55283	MCOLN3	mucolipin 3	0.928689	1.02967	0.800198	0.641118	0.721242	-0.00672171	0.122815	0.180555	0.0995381	-0.297879	-0.463686	-0.453192	-0.470465	-0.482551	-0.52435	-0.543956	-0.623861	-0.657163
202345_s_at	NM_001444	2171	FABP5	fatty acid binding protein 5 (psoriasis-associated)	0.648657	0.734665	0.501583	0.947505	0.670778	0.701732	0.324812	0.111407	-0.0819021	-0.35944	-0.343392	-0.130458	-0.52877	-0.929526	-0.426048	-0.505482	-0.627225	-0.708894
204362_at	NM_003930	8935	SKAP2	src kinase associated phosphoprotein 2	0.827789	0.85235	0.98518	0.66377	0.348908	0.203789	0.150263	0.0997032	0.0690548	-0.146445	-0.414508	-0.189588	-0.476346	-0.446835	-0.509682	-0.946258	-0.41375	-0.657396
208622_s_at	AA670344	7430	EZR	ezrin	0.919148	0.848739	0.845538	0.409699	0.310066	0.397428	0.33451	0.215887	0.00198921	-0.236737	-0.192443	-0.209318	-0.427268	-0.597606	-0.624439	-0.763215	-0.489089	-0.742887
208623_s_at	J05021	7430	EZR	ezrin	1.02429	0.812056	1.01566	0.326479	0.305099	0.595437	0.289823	0.0899252	-0.131745	-0.424419	-0.218312	-0.139388	-0.352396	-0.856176	-0.629665	-0.49398	-0.431256	-0.78144
200878_at	AF052094	2034	EPAS1	endothelial PAS domain protein 1	1.45387	1.46802	1.38703	0.273031	0.0927237	0.445062	0.0613957	-0.25296	-0.295523	-0.555623	-0.942617	-0.824636	-0.608533	-0.610354	-0.387373	-0.275032	-0.261347	-0.167141
204005_s_at	NM_002583	5074	PAWR	PRKC, apoptosis, WT1, regulator	0.625213	0.381375	0.601183	0.62878	0.510632	0.337925	0.691119	0.193755	0.197937	0.116219	-0.340196	0.152333	-0.0797292	-1.01453	-0.355322	-1.15085	-0.341735	-1.15411
221974_at	AW770748	3653	IPW	imprinted in Prader-Willi syndrome	0.698105	1.10007	1.09604	0.6231	0.52175	0.231554	0.187299	-0.0220294	0.0492477	-0.541063	-0.665556	-0.315119	-0.171463	-0.540258	-0.503236	-0.607791	-0.450341	-0.690307
219326_s_at	NM_006577	10678	B3GNT2	UDP-GlcNAc:betaGal beta-1,3-N-acetylglucosaminyltransferase 2	0.804635	0.874182	1.16346	0.314315	0.472843	0.18697	0.111597	0.179927	-0.0497058	0.0692668	-0.441334	-0.339363	-0.257074	-0.403721	-0.581422	-0.841938	-0.953768	-0.308872
202733_at	NM_004199	8974	P4HA2	procollagen-proline, 2-oxoglutarate 4-dioxygenase (proline 4-hydroxylase), alpha polypeptide II	0.378435	0.828786	0.797917	0.770382	0.326185	0.576893	0.269173	-0.35131	0.559181	0.287891	-0.118659	-0.501158	-0.670823	-0.58908	-0.751658	-0.433038	-0.763492	-0.615621
202023_at	NM_004428	1942	EFNA1	ephrin-A1	0.548105	0.741487	0.549684	0.761434	0.568938	0.563904	0.435008	0.102571	0.285841	-0.182006	-0.450209	-0.381213	-0.627067	-0.415268	-0.545221	-0.543991	-0.680461	-0.731535
218102_at	NM_015954	51071	DERA	2-deoxyribose-5-phosphate aldolase homolog (C. elegans)	0.483959	1.06942	0.76359	0.912095	0.266878	0.460496	0.187489	0.0624809	0.114554	-0.534827	-0.270294	-0.172428	-0.267099	-0.536916	-0.502664	-0.626125	-0.4963	-0.914305
208621_s_at	BF663141	7430	EZR	ezrin	0.938211	1.01946	0.995605	0.323498	0.340059	0.308212	0.242413	0.0495538	-0.157081	-0.0961543	-0.413757	-0.141961	-0.499194	-0.459315	-0.681313	-0.551275	-0.606639	-0.610319
215695_s_at	U94357	8908	GYG2	glycogenin 2	0.709289	0.600846	0.609904	0.677551	0.451806	0.223545	0.636158	-0.0284394	-0.0646729	0.127847	-0.173897	0.181474	-0.331952	-0.623953	-0.464045	-0.99815	-0.743187	-0.790125
202890_at	AW242297	9053	MAP7	microtubule-associated protein 7	1.05789	1.06663	1.24468	0.521725	0.0470949	0.173385	0.0540368	-0.00898645	-0.0193418	-0.330431	-0.433406	-0.44681	-0.428495	-0.363562	-0.410596	-0.656746	-0.486376	-0.580689
203992_s_at	AF000992	7403	UTX	ubiquitously transcribed tetratricopeptide repeat, X chromosome	0.552938	0.764252	0.583504	0.665021	0.560186	0.406464	0.525364	0.346116	-0.221249	-0.11932	-0.0481861	-0.220941	-0.481008	-0.851755	-0.538756	-0.659621	-0.499452	-0.763557
218611_at	NM_016545	51278	IER5	immediate early response 5	0.7521	1.06641	0.974246	0.709213	0.276626	1.5744	-0.0114487	-0.344895	-0.430887	-0.517201	-0.806089	-0.531496	-0.609396	-0.91123	-0.370502	-0.253811	-0.150063	-0.415985
202458_at	NM_007173	11098	PRSS23	protease, serine, 23	0.366808	0.589267	0.378188	0.791551	0.524855	0.890394	0.57812	0.181586	0.0962618	-0.163022	-0.271541	-0.237987	-0.402986	-0.585729	-0.615598	-0.684123	-0.668773	-0.767272
203407_at	NM_002705	5493	PPL	periplakin	0.622002	0.967187	0.767228	0.710708	0.229684	0.393832	0.352699	0.176625	-0.0796358	0.144697	-0.657543	-0.321973	-0.523678	-0.443615	-0.58038	-0.667694	-0.517703	-0.572442
37117_at	Z83838	23779	ARHGAP8	Rho GTPase activating protein 8	0.638787	1.02752	0.861881	0.511829	0.267164	0.557171	-0.0268291	-0.0567567	0.131795	-0.0901471	-0.213675	-0.168886	-0.536987	-0.426408	-0.483365	-0.538626	-0.554057	-0.900408
212590_at	AI431643	22800	RRAS2	related RAS viral (r-ras) oncogene homolog 2	0.79355	0.979674	0.664062	0.646558	0.291351	0.558345	0.137167	0.0768764	0.0963426	-0.283644	-0.233085	-0.37463	-0.64348	-0.638934	-0.466691	-0.523035	-0.320909	-0.759519
221029_s_at	NM_030775	81029	WNT5B	wingless-type MMTV integration site family, member 5B	1.0588	0.460953	1.20561	0.470371	0.663908	0.670704	-0.00929243	-0.0365294	-0.10843	-0.512096	-0.264263	-0.550204	-0.721547	-0.536211	-0.53779	-0.462059	-0.48196	-0.309958
202826_at	NM_003710	6692	SPINT1	serine peptidase inhibitor, Kunitz type 1	0.830993	1.08179	0.765318	0.57726	0.134856	0.292574	-0.00483702	0.362315	-0.0484193	-0.0739649	-0.23934	-0.441543	-0.267652	-0.472322	-0.637166	-0.563529	-0.710144	-0.586193
201667_at	NM_000165	2697	GJA1	gap junction protein, alpha 1, 43kDa	1.08628	1.07995	0.954081	0.544509	0.197161	0.371146	0.0817282	-0.149942	-0.236571	-0.38982	-0.35516	-0.189038	-0.428956	-0.544089	-0.444352	-0.575797	-0.480245	-0.520889
205374_at	NM_003063	6588	SLN	sarcolipin	0.923149	0.659769	0.899486	0.444146	0.307286	0.744396	-0.052742	0.141423	-0.177257	0.230168	-0.395256	-0.5267	-0.350366	-0.319954	-0.558723	-0.771392	-0.659935	-0.537498
219327_s_at	NM_022036	55890	GPRC5C	G protein-coupled receptor, family C, group 5, member C	0.443226	0.707915	0.492155	0.707364	0.415022	0.566062	0.526798	0.176726	0.228025	-0.0849304	-0.327618	-0.205353	-0.935385	-0.182063	-0.545207	-0.63935	-1.0097	-0.333686
203887_s_at	NM_000361	7056	THBD	thrombomodulin	0.765482	0.601657	0.922754	0.509171	0.253082	0.637939	0.17202	0.161898	0.0883244	-0.049982	-0.507632	-0.311156	-0.535646	-0.471677	-0.295841	-0.698459	-0.52236	-0.719573
208029_s_at	NM_018407	55353	LAPTM4B	lysosomal associated protein transmembrane 4 beta	0.519519	0.557931	0.721072	0.565234	0.504159	0.491184	0.382044	0.302699	0.143987	-0.136548	-0.317367	-0.17998	-0.539734	-0.559338	-0.51726	-0.703723	-0.651627	-0.582252
214039_s_at	T15777	55353	LAPTM4B	lysosomal associated protein transmembrane 4 beta	0.754039	0.692667	0.737057	0.488412	0.427959	0.405415	0.285413	0.192793	0.0916322	-0.0785812	-0.337831	-0.228834	-0.585307	-0.574257	-0.485842	-0.597273	-0.522197	-0.665266
209679_s_at	BC003379	57228	LOC57228	small trans-membrane and glycosylated protein	0.932601	0.95612	0.771483	0.51624	0.342407	0.376198	-0.0262598	-0.0742444	-0.0585391	-0.00485621	-0.266736	-0.373493	-0.406106	-0.267537	-0.573453	-0.497998	-0.774538	-0.571289
208767_s_at	AW149681	55353	LAPTM4B	lysosomal associated protein transmembrane 4 beta	0.718754	0.624321	0.580429	0.652928	0.422741	0.461927	0.209225	0.262316	0.0173377	0.0187856	-0.230248	-0.206476	-0.443964	-0.649573	-0.561906	-0.677846	-0.614869	-0.583882
211297_s_at	L20320	1022	CDK7	cyclin-dependent kinase 7	0.763615	0.853593	0.667975	0.576398	0.448566	0.385339	0.262964	-0.0899909	0.0964589	-0.173901	-0.148751	-0.231981	-0.329662	-0.846392	-0.714601	-0.331044	-0.586182	-0.602405
206332_s_at	NM_005531	3428	IFI16	interferon, gamma-inducible protein 16	0.448226	1.08925	0.843932	1.24218	0.637398	0.145768	0.0534208	-0.101466	-0.357643	-0.151632	-0.501318	-0.554245	-0.654047	-0.75399	-0.519106	-0.281532	-0.310499	-0.274694
219181_at	NM_006033	9388	LIPG	lipase, endothelial	0.624299	0.9727	0.700798	0.767114	0.336116	0.467323	0.157715	-0.0539095	-0.0847124	-0.341601	-0.362645	-0.226396	-0.365149	-0.25952	-0.395606	-0.487986	-0.667186	-0.781354
203705_s_at	AI333651	8324	FZD7	frizzled homolog 7 (Drosophila)	0.762909	0.854613	0.722008	0.310789	0.158495	0.44766	0.15545	0.235669	0.0974985	0.00329409	-0.0408167	-0.228756	-0.393747	-0.785569	-0.290839	-0.805072	-0.438298	-0.765287
204347_at	AI653169	205	AK3L1	adenylate kinase 3-like 1	0.812933	0.777802	0.561191	0.606443	0.314892	0.556026	0.0990377	-0.201037	0.380526	-0.0903646	-0.25447	-0.433551	-0.599817	-0.0328253	-0.461939	-0.828687	-0.69672	-0.509438
202330_s_at	NM_003362	7374	UNG	uracil-DNA glycosylase	0.52519	0.816253	0.717334	0.532396	0.309407	0.3812	0.369883	0.161406	-0.0828565	-0.120863	-0.156159	-0.00858412	-0.1801	-0.790368	-0.37539	-0.702295	-0.630538	-0.765914
202644_s_at	NM_006290	7128	TNFAIP3	tumor necrosis factor, alpha-induced protein 3	1.05935	0.882427	0.879445	0.456078	0.431816	0.301721	0.147644	0.000713925	-0.29969	-0.249789	-0.37622	-0.461713	-0.296662	-0.536307	-0.360023	-0.435994	-0.68762	-0.455178
203851_at	NM_002178	3489	IGFBP6	insulin-like growth factor binding protein 6	0.840313	0.511142	0.477367	0.908763	0.588209	0.543582	0.086576	0.0529255	0.0485682	-0.186342	-0.289645	-0.474599	-0.529533	-0.520816	-0.394676	-0.451318	-0.710263	-0.500253
214022_s_at	AA749101	10581	IFITM2	interferon induced transmembrane protein 2 (1-8D)	1.02386	0.927294	0.818722	0.523198	0.381134	0.251773	-0.125162	-0.141538	-0.0935699	-0.0208683	-0.218349	-0.406242	-0.591396	-0.167494	-0.359867	-0.531147	-0.696502	-0.573841
203917_at	NM_001338	1525	CXADR	coxsackie virus and adenovirus receptor	0.719417	0.769469	0.815708	0.647605	0.498929	0.232236	0.262273	0.0507979	0.0767619	-0.275714	-0.320271	-0.347881	-0.512969	-0.704103	-0.672149	-0.415967	-0.26083	-0.563312
210942_s_at	AB022918	10402	ST3GAL6	ST3 beta-galactoside alpha-2,3-sialyltransferase 6	0.601034	0.786323	0.826369	0.600869	0.258697	0.53861	0.271069	-0.00821608	0.110123	-0.125959	-0.356406	-0.529821	-0.371024	-0.379374	-0.460932	-0.495142	-0.404103	-0.862117
207843_x_at	NM_001914	1528	CYB5A	cytochrome b5 type A (microsomal)	0.623388	0.949145	0.894157	0.448903	0.294251	0.549158	0.154821	0.0333957	0.0372716	-0.292133	-0.400258	-0.170965	-0.536865	-0.692123	-0.548624	-0.496258	-0.455163	-0.3921
203434_s_at	AI433463	4311	MME	membrane metallo-endopeptidase	0.532565	0.639994	0.618595	0.85114	0.481874	0.201695	0.607234	0.142042	0.0957019	-0.168221	-0.645536	-0.375356	-0.400973	-0.46521	-0.369164	-0.764905	-0.381966	-0.59951
201195_s_at	AB018009	8140	SLC7A5	solute carrier family 7 (cationic amino acid transporter, y+ system), member 5	0.743191	0.69953	0.821934	0.278801	0.495813	0.151664	0.291152	0.120313	0.0561375	-0.0943004	-0.000441908	-0.167072	-0.436048	-0.329392	-0.658466	-0.593672	-0.695192	-0.683951
218330_s_at	NM_018162	NaN	NA	NA	0.979467	1.01275	0.972469	0.180096	0.210303	0.31614	0.109714	-0.102375	-0.0171586	-0.226922	-0.131835	-0.31349	-0.179523	-0.837845	-0.355166	-0.905241	-0.253341	-0.458046
201200_at	NM_003851	8804	CREG1	cellular repressor of E1A-stimulated genes 1	0.693795	0.454023	0.631269	0.602088	0.692053	0.466115	0.282028	0.142493	0.106263	-0.329138	-0.283393	-0.269264	-0.376407	-0.578299	-0.516286	-0.501885	-0.564038	-0.651416
203256_at	NM_001793	1001	CDH3	cadherin 3, type 1, P-cadherin (placental)	0.71475	0.606249	0.719055	0.425374	0.318054	0.415925	0.287728	0.301552	0.133579	-0.159396	-0.141765	-0.307414	-0.288625	-0.484364	-0.786762	-0.701882	-0.382808	-0.669251
39248_at	N74607	360	AQP3	aquaporin 3 (Gill blood group)	1.30367	1.31798	1.46165	-0.105693	0.036038	0.038497	0.119637	-0.331159	-0.164948	-0.300923	-0.503786	-0.456245	-0.53434	-0.425164	-0.468709	-0.299884	-0.328161	-0.358467
204304_s_at	NM_006017	8842	PROM1	prominin 1	0.644303	0.907471	0.759938	0.511003	0.521414	0.352008	0.299143	0.118078	-0.1257	-0.359772	-0.391205	-0.388047	-0.236825	-0.653023	-0.408842	-0.497671	-0.495872	-0.556399
210868_s_at	BC001305	79071	ELOVL6	ELOVL family member 6, elongation of long chain fatty acids (FEN1/Elo2, SUR4/Elo3-like, yeast)	0.391981	0.615865	0.594396	0.725944	0.322976	0.464776	0.482451	0.173364	0.010509	-0.0451473	-0.598167	0.122871	-0.208436	-0.589773	-0.303521	-0.685028	-0.575916	-0.899144
209772_s_at	X69397	934	CD24	CD24 molecule	1.01977	0.936768	0.930399	0.465604	0.258515	0.324018	-0.00609709	-0.0607722	-0.139689	-0.346508	-0.295698	-0.393149	-0.428885	-0.541484	-0.351797	-0.519382	-0.36863	-0.482985
205445_at	NM_000948	5617	PRL	prolactin	0.159279	0.114227	0.272921	1.75605	1.24882	1.11264	0.113765	-0.100066	-0.340514	-0.458838	-0.385063	-0.763782	-0.840833	-0.206193	-0.487967	-0.486951	-0.327556	-0.379936
212501_at	AL564683	1051	CEBPB	CCAAT/enhancer binding protein (C/EBP), beta	0.836764	1.00663	0.672031	0.20387	0.0546662	0.721414	0.270932	-0.355032	0.128586	0.0465618	-0.104899	-0.258171	-0.519803	-0.484469	-0.711151	-0.534178	-0.416516	-0.557239
208650_s_at	BG327863	934	CD24	CD24 molecule	0.915696	0.911043	0.935458	0.496971	0.258385	0.416711	0.0875177	-0.0213727	-0.263219	-0.302788	-0.440078	-0.214017	-0.35999	-0.90459	-0.330368	-0.468852	-0.369695	-0.34681
215446_s_at	L16895	4015	LOX	lysyl oxidase	1.0354	1.16221	1.15621	0.0392319	0.156913	-0.0505938	0.331335	-0.367104	0.164285	-0.249098	-0.184762	-0.472068	-0.529634	-0.418637	-0.49424	-0.423778	-0.317075	-0.538588
211404_s_at	BC004371	334	APLP2	amyloid beta (A4) precursor-like protein 2	0.879656	1.00653	0.814991	0.29646	0.210131	0.316552	0.214896	-0.00748804	-0.148195	-0.230598	-0.25015	-0.156388	-0.344485	-0.538769	-0.491891	-0.487682	-0.477625	-0.60595
205603_s_at	NM_007309	1730	DIAPH2	diaphanous homolog 2 (Drosophila)	1.2975	1.15306	1.09338	0.481007	0.206395	-0.163924	-0.0549561	-0.254347	-0.351987	-0.409579	-0.249508	-0.311289	-0.38069	-0.427825	-0.473372	-0.391899	-0.49505	-0.266908
212884_x_at	AI358867	348	APOE	apolipoprotein E	1.28705	0.876864	0.999002	0.565783	0.390056	0.341091	0.0658411	-0.140454	-0.185633	-0.537259	-0.856498	-0.68129	-0.448577	-0.608027	-0.61909	-0.136612	-0.215303	-0.0969445
204731_at	NM_003243	7049	TGFBR3	transforming growth factor, beta receptor III	0.408764	1.03103	0.991102	0.392134	0.0618672	0.410372	0.291558	-0.0757529	0.197706	-0.223084	-0.351669	-0.0484791	-0.399808	-0.756401	-0.584387	-0.286696	-0.586075	-0.472176
209366_x_at	M22865	1528	CYB5A	cytochrome b5 type A (microsomal)	0.777427	0.831469	0.74247	0.492411	0.338682	0.514285	0.234388	-0.0270498	-0.034006	-0.313687	-0.471444	-0.222587	-0.572013	-0.523182	-0.638228	-0.477464	-0.378812	-0.272659
216603_at	AL365343	23428	SLC7A8	solute carrier family 7 (cationic amino acid transporter, y+ system), member 8	0.878472	0.795019	1.07577	0.127699	0.475436	-0.0446326	0.305686	0.0232694	-0.00587856	-0.172626	-0.416794	-0.465996	-0.147964	-0.282343	-0.248323	-0.662047	-0.597276	-0.637471
208965_s_at	BG256677	3428	IFI16	interferon, gamma-inducible protein 16	0.524568	1.04801	0.578374	1.0832	0.433648	-0.0126021	0.268723	0.0233388	-0.0838203	-0.386984	-0.527097	-0.309238	-0.670758	-0.43186	-0.357753	-0.153011	-0.554389	-0.472349
213446_s_at	AI679073	8826	IQGAP1	IQ motif containing GTPase activating protein 1	0.679258	1.35509	0.829756	0.278685	0.0437337	0.069601	0.266462	0.220081	-0.0150127	-0.408064	-0.517098	-0.158958	-0.418635	-0.223421	-0.392061	-0.506792	-0.488191	-0.614436
219681_s_at	NM_025151	80223	RAB11FIP1	RAB11 family interacting protein 1 (class I)	0.567083	0.702834	0.897169	0.627702	0.312265	0.441563	0.062458	0.0898593	-0.0859508	-0.144233	-0.429111	-0.286699	-0.387607	-0.389493	-0.15325	-0.527141	-0.596154	-0.701293
212589_at	AI753792	22800	RRAS2	related RAS viral (r-ras) oncogene homolog 2	0.928233	0.874058	0.94813	0.406114	0.167063	0.328049	0.00613997	-0.0439667	-0.174639	-0.216508	-0.133518	-0.187448	-0.424903	-0.66694	-0.438866	-0.535272	-0.398352	-0.437374
200632_s_at	NM_006096	10397	NDRG1	N-myc downstream regulated gene 1	0.550772	0.794718	0.741137	0.318364	0.352874	0.110813	0.531259	0.00492218	0.220518	-0.0607516	-0.28112	-0.0794822	-0.677788	-0.410631	-0.444853	-0.495163	-0.385557	-0.79003
210139_s_at	L03203	5376	PMP22	peripheral myelin protein 22	0.648575	0.708292	0.709487	0.976252	0.624828	0.635229	0.240119	0.0319646	0.0320488	-0.646463	-0.886057	-0.657338	-0.749718	-0.900085	-0.775772	0.0410522	0.0986324	-0.131048
215783_s_at	X14174	249	ALPL	alkaline phosphatase, liver/bone/kidney	0.545314	0.729079	0.574408	0.587491	0.32548	0.619298	-0.0692723	0.290753	0.0634472	-0.265654	-0.0113872	-0.216198	-0.591776	-0.52618	-0.427674	-0.579564	-0.599954	-0.447613
218728_s_at	NM_014184	29097	CNIH4	cornichon homolog 4 (Drosophila)	0.631881	0.759214	0.611695	0.594035	0.370717	0.418867	0.186835	-0.143009	0.0242903	-0.157988	-0.0585324	-0.0919572	-0.609048	-0.434016	-0.523892	-0.408866	-0.483778	-0.686449
201005_at	NM_001769	928	CD9	CD9 molecule	1.02488	1.04167	0.985195	0.310237	0.0593298	0.403298	0.0892848	-0.329647	-0.192192	-0.0681808	-0.304571	-0.454068	-0.558931	-0.419397	-0.430673	-0.412585	-0.304571	-0.439072
209267_s_at	AB040120	64116	SLC39A8	solute carrier family 39 (zinc transporter), member 8	0.946029	1.11255	1.05828	0.855145	0.288156	0.368255	-0.222459	-0.417992	-0.243051	-0.919742	-0.860283	0.0464859	-0.333908	-0.210967	-0.726813	-0.328957	-0.192319	-0.218412
206224_at	NM_001898	1469	CST1	cystatin SN	1.4814	1.78239	1.15391	-0.0989921	0.0900528	-0.273924	-0.393977	-0.357595	-0.324842	-0.294287	-0.309169	-0.422963	-0.302997	-0.319598	-0.320773	-0.386155	-0.326602	-0.375878
201968_s_at	NM_002633	5236	PGM1	phosphoglucomutase 1	0.430116	0.689905	0.701621	0.642228	0.311464	0.462972	0.0876429	-0.134819	0.353761	0.0192412	-0.046929	-0.364394	-0.497512	-0.538852	-0.638303	-0.480581	-0.389454	-0.608105
201695_s_at	NM_000270	4860	NP	nucleoside phosphorylase	0.749455	0.919252	0.850954	0.470581	0.52256	0.4242	-0.0312061	-0.0328302	-0.106448	-0.27485	-0.592155	-0.451301	-0.618452	-0.353825	-0.425096	-0.313785	-0.32314	-0.413914
204079_at	NM_003595	8459	TPST2	tyrosylprotein sulfotransferase 2	0.492017	1.07369	0.923538	0.43279	0.158945	0.360902	0.0140302	-0.0680079	-0.0828939	-0.0102297	-0.216131	-0.186342	-0.480778	-0.682171	-0.32173	-0.460267	-0.556848	-0.390519
219165_at	NM_021630	64236	PDLIM2	PDZ and LIM domain 2 (mystique)	0.688798	0.662399	0.494359	0.417316	0.343933	0.429367	0.273741	0.000716249	0.286313	0.0903278	-0.325867	-0.18086	-0.477136	-0.548101	-0.657156	-0.593819	-0.420992	-0.483338
208703_s_at	BG427393	334	APLP2	amyloid beta (A4) precursor-like protein 2	0.765653	0.663326	0.675217	0.444333	0.500923	0.381155	0.209927	0.00250838	-0.108888	-0.0509697	-0.342738	-0.223755	-0.491913	-0.604761	-0.572895	-0.450421	-0.398356	-0.398346
201021_s_at	BF697964	11034	DSTN	destrin (actin depolymerizing factor)	0.639384	0.64246	0.615798	0.494435	0.276937	0.366099	0.262795	0.14789	0.0677616	-0.0246389	-0.279349	-0.127939	-0.563813	-0.556932	-0.433074	-0.469708	-0.597741	-0.460365
211778_s_at	BC006148	58495	OVOL2	ovo-like 2 (Drosophila)	0.808712	0.914236	1.00394	0.191123	0.281396	0.213113	0.039913	0.0569138	0.025471	-0.285227	-0.223097	-0.496108	-0.476928	-0.118687	-0.5084	-0.488123	-0.38682	-0.551429
218326_s_at	NM_018490	55366	LGR4	leucine-rich repeat-containing G protein-coupled receptor 4	0.722986	0.676968	0.718928	0.429258	0.004281	0.248045	0.422237	0.274046	-0.025492	-0.218844	-0.273662	-0.0161251	-0.172371	-0.715168	-0.294949	-0.741648	-0.409575	-0.628915
203359_s_at	AL525412	26292	MYCBP	c-myc binding protein	0.444262	0.636989	0.386994	0.80434	0.186266	0.626351	0.333851	0.148208	-0.00832416	-0.205179	-0.167717	0.0310214	-0.643834	-0.72744	-0.397521	-0.564819	-0.310098	-0.573349
205923_at	NM_005045	5649	RELN	reelin	0.568511	0.3815	0.735484	0.346447	0.398277	0.563811	0.17442	0.299314	0.216197	-0.149573	-0.196863	-0.281768	-0.364619	-0.441946	-0.728401	-0.612727	-0.346805	-0.561259
202145_at	NM_002346	4061	LY6E	lymphocyte antigen 6 complex, locus E	0.71132	0.576576	0.658299	0.283147	0.465516	0.3053	0.220741	0.152342	0.100045	-0.033945	-0.0142658	-0.468451	-0.259816	-0.406515	-0.75451	-0.508906	-0.453534	-0.573344
210592_s_at	M55580	6303	SAT1	spermidine/spermine N1-acetyltransferase 1	0.525805	1.01352	0.829439	0.732316	0.333897	0.608618	0.0769299	-0.318182	-0.088028	-0.405258	-0.494402	-0.46171	-0.642083	-0.537648	-0.568958	-0.144245	-0.179326	-0.280685
218353_at	NM_025226	NaN	NA	NA	0.591659	0.567163	0.34161	0.932978	0.431354	0.100066	0.391345	0.147156	-0.00472177	-0.0665673	-0.145518	-0.321314	-0.617366	-0.622343	-0.231397	-0.717436	-0.258972	-0.517694
213051_at	AI133727	56829	ZC3HAV1	zinc finger CCCH-type, antiviral 1	0.784408	0.681354	0.681431	0.292227	0.0727939	0.256119	0.0878978	0.269086	0.118035	-0.0525398	0.119303	-0.180698	-0.414926	-0.499956	-0.507123	-0.414999	-0.581829	-0.710585
203372_s_at	AB004903	8835	SOCS2	suppressor of cytokine signaling 2	1.02984	1.25184	1.30629	0.217273	-0.0339523	0.0845022	-0.130161	-0.180717	-0.156682	-0.351213	-0.578062	-0.512488	-0.455285	-0.214836	-0.443583	-0.203057	-0.286625	-0.343087
203313_s_at	NM_003244	7050	TGIF1	TGFB-induced factor homeobox 1	0.753821	0.809101	0.837043	0.451005	0.297947	0.335737	0.138851	0.0224061	-0.0992999	-0.427164	-0.0292639	-0.524096	-0.343932	-0.640037	-0.501589	-0.309311	-0.245486	-0.525732
206669_at	NM_013445	2571	GAD1	glutamate decarboxylase 1 (brain, 67kDa)	0.960967	1.31638	1.08851	0.311112	0.0841841	0.0327798	-0.300154	-0.22482	-0.234885	-0.199747	-0.232718	-0.362933	-0.412749	-0.318933	-0.401382	-0.335544	-0.391787	-0.378287
205480_s_at	NM_006759	7360	UGP2	UDP-glucose pyrophosphorylase 2	0.796683	1.09588	0.903774	0.405562	0.2082	0.235913	0.111053	-0.107959	-0.175279	-0.305744	-0.479037	-0.263428	-0.426806	-0.758393	-0.486204	-0.240767	-0.237735	-0.275711
206390_x_at	NM_002619	5196	PF4	platelet factor 4 (chemokine (C-X-C motif) ligand 4)	0.845492	0.978924	0.96603	0.61278	0.391208	0.556522	-0.171189	-0.592075	-0.171127	-0.426537	-0.552078	-0.578976	-0.111158	-0.269491	-0.482067	-0.202248	-0.327201	-0.466809
202236_s_at	NM_003051	6566	SLC16A1	solute carrier family 16, member 1 (monocarboxylic acid transporter 1)	0.80767	0.819667	0.771515	0.355276	0.20389	0.24454	0.0419167	-0.0629839	-0.0559642	-0.155358	-0.0784597	-0.184562	-0.176073	-0.524292	-0.477139	-0.601504	-0.33673	-0.591409
205924_at	BC005035	5865	RAB3B	RAB3B, member RAS oncogene family	1.01474	0.782307	0.983435	0.27867	0.0614487	0.0703814	-0.17218	0.043972	0.114099	-0.126207	-0.120223	-0.469462	-0.291007	-0.332024	-0.270013	-0.395271	-0.649425	-0.523235
204485_s_at	NM_005486	10040	TOM1L1	target of myb1 (chicken)-like 1	0.676637	0.774877	0.58669	0.471956	0.30465	0.267541	0.140652	0.0886605	0.00690692	-0.0974499	-0.238151	-0.308407	-0.341552	-0.377721	-0.384307	-0.58875	-0.49402	-0.488215
209016_s_at	BC002700	3855	KRT7	keratin 7	0.666584	0.814338	0.754206	0.489146	0.139266	0.317003	0.239381	0.125577	-0.143208	-0.213189	-0.249799	-0.336648	-0.504723	-0.356344	-0.473722	-0.359479	-0.400724	-0.507665
203934_at	NM_002253	3791	KDR	kinase insert domain receptor (a type III receptor tyrosine kinase)	0.181711	0.790131	0.841598	0.466036	0.260808	0.451867	0.343333	0.0379343	0.132632	-0.326808	-0.0860954	-0.203155	-0.418336	-0.605214	-0.576085	-0.464231	-0.489193	-0.336933
211020_at	L19659	2651	GCNT2	glucosaminyl (N-acetyl) transferase 2, I-branching enzyme (I blood group)	0.846311	0.817452	1.00605	0.152402	0.0962522	0.37797	0.0596273	-0.054907	-0.189964	-0.0927922	-0.325358	-0.241539	-0.390541	-0.227242	-0.27268	-0.512155	-0.524902	-0.523989
202643_s_at	AI738896	7128	TNFAIP3	tumor necrosis factor, alpha-induced protein 3	0.904931	0.856533	0.696549	0.160362	0.200087	0.175034	0.142999	0.135568	-0.0309676	-0.0621713	-0.249267	-0.418875	-0.278211	-0.347752	-0.280164	-0.776286	-0.426734	-0.401635
206756_at	NM_019886	56548	CHST7	carbohydrate (N-acetylglucosamine 6-O) sulfotransferase 7	0.819545	1.22979	0.609249	0.235582	0.12872	0.166074	-0.010824	-0.179468	0.00929145	-0.0728052	-0.134538	-0.281557	-0.390279	-0.267966	-0.328298	-0.551131	-0.563128	-0.418263
212063_at	BE903880	10728	PTGES3	prostaglandin E synthase 3 (cytosolic)	0.847127	1.42576	1.15581	-0.0429435	-0.0788511	0.0594193	0.0805467	-0.242099	0.100181	-0.212729	-0.412991	-0.483935	-0.564869	-0.48864	-0.38638	-0.231491	-0.165123	-0.358796
221376_at	NM_003867	8822	FGF17	fibroblast growth factor 17	0.262229	0.335562	0.549674	1.25917	0.656233	0.452749	0.219131	0.00919953	-0.0246409	-0.445247	-0.537436	-0.395312	-0.191121	-0.471012	-0.275292	-0.530976	-0.408695	-0.464217
210664_s_at	AF021834	7035	TFPI	tissue factor pathway inhibitor (lipoprotein-associated coagulation inhibitor)	0.531679	0.86098	0.550051	0.42521	0.28532	0.281148	0.408887	-0.00332077	0.0638109	-0.0796965	-0.377498	-0.24963	-0.67697	-0.293992	-0.375357	-0.232536	-0.695311	-0.422776
210540_s_at	BC004523	8702	B4GALT4	UDP-Gal:betaGlcNAc beta 1,4- galactosyltransferase, polypeptide 4	0.501448	0.989813	0.962343	0.360308	0.247526	0.215069	0.140139	-0.170691	-0.0836799	-0.28237	-0.20269	-0.18849	-0.393925	-0.367172	-0.417052	-0.417243	-0.378965	-0.514368
200696_s_at	NM_000177	2934	GSN	gelsolin (amyloidosis, Finnish type)	0.44856	0.632022	0.710492	0.576208	0.397837	0.35547	0.339511	0.02072	0.23779	-0.238158	-0.490773	-0.382263	-0.592884	-0.531172	-0.573442	-0.381807	-0.187981	-0.340132
204361_s_at	AB014486	8935	SKAP2	src kinase associated phosphoprotein 2	0.560426	1.28023	0.704366	0.389477	0.243275	0.169358	-0.0466755	0.0557341	-0.172683	-0.240862	-0.186889	-0.445549	-0.421432	-0.263376	-0.302575	-0.34078	-0.404719	-0.577326
205048_s_at	NM_003832	8781	PSPHL	phosphoserine phosphatase-like	0.650228	0.579024	0.565378	0.47455	0.369104	0.528165	0.395035	-0.160208	-0.138903	0.138716	-0.363342	-0.0860219	-0.679096	-1.265	-0.0781923	-0.412103	-0.341023	-0.176309
218194_at	NM_015523	25996	REXO2	REX2, RNA exonuclease 2 homolog (S. cerevisiae)	0.648032	0.495798	0.573741	0.467569	0.562594	0.298867	0.239328	0.0716672	-0.00210394	-0.171142	-0.184591	-0.195862	-0.371215	-0.582566	-0.538496	-0.5444	-0.306198	-0.461023
203973_s_at	NM_005195	1052	CEBPD	CCAAT/enhancer binding protein (C/EBP), delta	0.582224	0.603455	0.717693	0.0406262	0.0681011	0.38859	0.552178	0.0111748	0.421089	-0.079681	-0.12184	-0.181176	-0.525513	-0.204588	-0.71225	-0.470572	-0.303174	-0.786339
206023_at	NM_006681	10874	NMU	neuromedin U	0.94934	1.04522	1.01181	0.51917	0.099899	0.473255	-0.0628702	-0.559388	-0.313876	-0.557537	-0.415623	-0.429839	-0.313855	-0.408666	-0.112866	-0.379437	-0.177992	-0.36675
211597_s_at	AB059408	84525	HOPX	HOP homeobox	1.04646	1.27999	0.864793	-0.0377698	-0.0785749	0.267817	-0.201634	-0.0105672	-0.0978383	-0.179528	-0.399621	-0.32181	-0.348227	-0.340115	-0.219676	-0.488307	-0.339994	-0.395398
206397_x_at	NM_001492	2657	GDF1	growth differentiation factor 1	0.764804	1.0621	0.891921	0.284781	0.359401	0.0882911	-0.11803	-0.34278	-0.0249369	-0.28375	-0.213739	-0.277374	-0.263199	-0.244379	-0.384657	-0.4856	-0.375407	-0.437444
218261_at	NM_005498	10053	AP1M2	adaptor-related protein complex 1, mu 2 subunit	0.754058	0.781276	0.635368	0.39219	0.263828	-0.0283739	-0.00277689	0.227195	-0.0591249	-0.0388862	0.018437	-0.37862	-0.336526	-0.309831	-0.253345	-0.539973	-0.599833	-0.525061
218258_at	NM_015972	51082	POLR1D	polymerase (RNA) I polypeptide D, 16kDa	0.655836	0.607268	0.624195	0.476105	0.317737	0.462991	0.270452	-0.272976	0.036938	-0.083847	-0.309556	-0.160864	-0.617821	-0.564492	-0.355515	-0.249197	-0.453251	-0.384004
219073_s_at	NM_017784	114884	OSBPL10	oxysterol binding protein-like 10	0.464924	0.873634	0.559756	0.49338	-0.0577331	0.24397	0.304331	0.220932	0.0823115	0.146209	-0.416681	-0.28618	-0.469822	-0.471571	-0.433503	-0.410277	-0.504181	-0.339499
201242_s_at	BC000006	481	ATP1B1	ATPase, Na+/K+ transporting, beta 1 polypeptide	0.865068	0.77989	0.81965	0.512475	-0.136314	0.504248	0.344433	-0.34218	-0.086096	-0.431994	-0.572263	-0.0190486	-0.269785	-0.708458	-0.414628	-0.31707	-0.148668	-0.37926
215145_s_at	AC005378	26047	CNTNAP2	contactin associated protein-like 2	0.616703	0.837137	1.01963	0.645891	0.0266978	0.32366	-0.122207	-0.124799	-0.090161	-0.159724	-0.618216	-0.248803	-0.601645	-0.364208	-0.272243	-0.246452	-0.321055	-0.300202
202814_s_at	AW193511	10614	HEXIM1	hexamethylene bis-acetamide inducible 1	0.790991	0.753302	0.583764	0.244627	0.447993	0.217767	0.193115	0.093899	-0.0454854	-0.475136	-0.39018	-0.170455	-0.13725	-0.317617	-0.379063	-0.452491	-0.414064	-0.543716
200648_s_at	NM_002065	2752	GLUL	glutamate-ammonia ligase (glutamine synthetase)	0.475595	0.830689	0.462773	0.523751	0.34139	0.510523	0.11752	0.0447308	-0.100334	-0.257027	-0.240298	-0.300316	-0.474501	-0.429893	-0.274166	-0.438081	-0.392446	-0.399912
214875_x_at	AW001847	334	APLP2	amyloid beta (A4) precursor-like protein 2	0.43319	0.671376	0.673164	0.396513	0.480759	0.305149	0.220283	-0.0327413	-0.0790813	-0.194554	-0.211954	-0.0863403	-0.384976	-0.395585	-0.576885	-0.523087	-0.301998	-0.393232
219302_s_at	NM_014141	26047	CNTNAP2	contactin associated protein-like 2	0.997	0.897902	0.778886	0.510168	0.118621	0.304878	-0.0196734	0.0245654	-0.45946	-0.393303	-0.342054	-0.501358	-0.406751	-0.489038	-0.307664	-0.385952	-0.127335	-0.199431
204624_at	NM_000053	540	ATP7B	ATPase, Cu++ transporting, beta polypeptide	0.625904	0.74435	0.833988	0.0856498	0.0561053	0.385216	0.384032	0.18865	0.212063	-0.462909	-0.433855	-0.400348	-0.392759	-0.20732	-0.386883	-0.60997	-0.28428	-0.337636
221933_at	AI338338	57502	NLGN4X	neuroligin 4, X-linked	0.626638	0.909238	0.705662	0.253023	0.184541	0.0291779	0.38778	-0.0571879	-0.0925503	-0.221958	-0.0918979	-0.146207	-0.333636	-0.565775	-0.300411	-0.464604	-0.309787	-0.512044
218676_s_at	NM_021213	58488	PCTP	phosphatidylcholine transfer protein	0.532154	0.640826	0.59073	0.543285	0.348409	0.463027	-0.0730543	0.019949	-0.0771585	-0.285893	-0.11755	-0.2089	-0.217117	-0.287508	-0.285755	-0.590525	-0.391186	-0.603734
202543_s_at	BC005359	2764	GMFB	glia maturation factor, beta	0.591769	1.01691	0.729051	0.420809	0.0660622	0.108256	0.219223	0.00754537	-0.0440671	-0.39174	-0.455663	-0.0480282	-0.379168	-0.359411	-0.354181	-0.456751	-0.255095	-0.415526
213698_at	AI805560	9204	ZMYM6	zinc finger, MYM-type 6	0.85321	0.666867	0.636749	0.268707	0.335282	0.265125	0.123809	-0.033792	-0.205153	0.0759594	-0.35955	-0.234473	-0.338342	-0.510525	-0.389681	-0.360709	-0.316665	-0.476818
206702_at	NM_000459	7010	TEK	TEK tyrosine kinase, endothelial (venous malformations, multiple cutaneous and mucosal)	0.724124	0.484137	0.592363	0.456762	0.218271	0.503354	0.139558	-0.0844625	-0.182494	-0.0879277	-0.103365	-0.138473	-0.317284	-0.269086	-0.489265	-0.569536	-0.415507	-0.461167
201688_s_at	BG389015	7163	TPD52	tumor protein D52	0.921998	0.885656	0.849574	0.521204	0.0481602	0.211172	-0.0663727	-0.467772	-0.160078	-0.160132	-0.402072	-0.26639	-0.265825	-0.242662	-0.227294	-0.443651	-0.489397	-0.246117
204944_at	NM_002841	5793	PTPRG	protein tyrosine phosphatase, receptor type, G	0.71391	0.898371	0.804413	0.49012	-0.00200092	0.351183	0.148201	-0.185155	-0.331554	-0.237859	-0.295201	-0.157143	-0.352289	-0.560442	-0.387229	-0.395072	-0.0874995	-0.414753
217794_at	NM_018457	54458	PRR13	proline rich 13	0.906731	0.700233	0.75366	0.253597	0.233436	0.251992	-0.0172035	-0.0077269	-0.0976915	-0.259701	-0.22019	-0.206905	-0.364695	-0.348524	-0.51018	-0.380415	-0.216883	-0.469535
216092_s_at	AL365347	23428	SLC7A8	solute carrier family 7 (cationic amino acid transporter, y+ system), member 8	0.576395	0.636823	0.538214	0.530545	0.411092	0.238146	0.220944	0.160898	0.0241867	-0.359203	-0.394834	-0.403596	-0.344692	-0.20733	-0.419203	-0.346472	-0.654704	-0.207209
206894_at	NM_000482	337	APOA4	apolipoprotein A-IV	1.5479	1.46776	1.19764	-0.212439	-0.102105	-0.357079	-0.250377	-0.496782	-0.352865	-0.317568	-0.114255	-0.284095	-0.296905	-0.271564	-0.528747	-0.267885	-0.0289285	-0.331697
207016_s_at	AB015228	8854	ALDH1A2	aldehyde dehydrogenase 1 family, member A2	0.83945	0.714835	0.770781	0.621602	0.215554	0.211091	0.00740032	-0.0103609	-0.326997	-0.328991	-0.416441	-0.243636	-0.425606	-0.450668	-0.399161	-0.310526	-0.111744	-0.356581
214701_s_at	AJ276395	2335	FN1	fibronectin 1	0.447945	0.819066	0.614301	0.45372	0.453747	0.14904	0.148401	0.0699901	0.198216	-0.383043	-0.330533	-0.393765	-0.416048	-0.45107	-0.470402	-0.129798	-0.315086	-0.464682
212686_at	AB032983	57460	PPM1H	protein phosphatase 1H (PP2C domain containing)	1.01736	0.691229	0.816158	0.290211	0.050432	0.255716	-0.019462	-0.0874918	-0.156909	-0.156692	-0.346044	-0.186824	-0.270981	-0.439733	-0.338657	-0.454175	-0.359358	-0.304785
201926_s_at	BC001288	1604	CD55	CD55 molecule, decay accelerating factor for complement (Cromer blood group)	1.03877	0.921365	0.875823	0.201189	-0.0826322	0.117134	-0.0681607	-0.0806783	-0.0848606	-0.312153	-0.279295	-0.234648	-0.206102	-0.254594	-0.467469	-0.453652	-0.32657	-0.303469
208702_x_at	AI525212	334	APLP2	amyloid beta (A4) precursor-like protein 2	0.916724	0.350645	0.776207	0.201676	0.377644	0.290152	0.102868	-0.0260502	-0.086501	-0.11915	-0.0976128	-0.1746	-0.393613	-0.468094	-0.631181	-0.4108	-0.298138	-0.310174
209307_at	AB014540	23075	SWAP70	SWAP-70 protein	0.382376	0.865437	0.763501	0.417076	-0.155658	0.0520906	0.350958	0.143812	0.0940028	-0.110092	-0.124865	-0.149409	-0.335054	-0.669352	-0.293328	-0.380959	-0.434286	-0.41625
202235_at	BF511091	6566	SLC16A1	solute carrier family 16, member 1 (monocarboxylic acid transporter 1)	0.487785	0.936668	0.754715	0.627964	-0.056296	0.281427	0.0753718	-0.147004	-0.233851	-0.110372	-0.265872	-0.224887	-0.312663	-0.363261	-0.247013	-0.423784	-0.266469	-0.512458
202626_s_at	NM_002350	4067	LYN	v-yes-1 Yamaguchi sarcoma viral related oncogene homolog	0.475727	1.089	1.0092	0.053464	0.409257	0.139126	-0.016133	-0.247877	-0.0647801	-0.236561	-0.452573	-0.11893	-0.26744	-0.47601	-0.319512	-0.311233	-0.33884	-0.325884
203360_s_at	D50692	26292	MYCBP	c-myc binding protein	0.641038	0.656972	0.498202	0.496484	0.248829	0.532457	0.0644276	-0.0883774	-0.231378	-0.344756	0.007798	0.0576865	-0.313324	-0.592446	-0.556752	-0.424435	-0.153414	-0.49901
210427_x_at	BC001388	302	ANXA2	annexin A2	0.729478	0.803107	0.696383	0.41418	0.370038	0.343062	0.173805	-0.0813685	-0.157171	-0.545621	-0.439919	-0.417614	-0.483373	-0.323705	-0.414412	-0.216621	-0.126647	-0.323601
219651_at	NM_018189	55211	DPPA4	developmental pluripotency associated 4	0.439085	0.82945	1.08006	0.427483	-0.0371826	0.0358513	0.0404374	0.0236875	-0.137014	-0.298698	-0.267918	-0.0257759	-0.0597989	-0.409515	-0.125993	-0.634378	-0.374243	-0.505534
213927_at	AV753204	4293	MAP3K9	mitogen-activated protein kinase kinase kinase 9	0.527086	0.874914	0.758393	0.26336	0.233024	0.320371	-0.0305774	-0.0769135	-0.0142496	-0.125601	-0.170551	-0.307685	-0.295577	-0.389312	-0.492236	-0.434856	-0.263906	-0.375683
203325_s_at	AI130969	1289	COL5A1	collagen, type V, alpha 1	0.430463	0.593799	0.688585	0.332112	0.288865	0.440124	0.207159	0.215272	0.118379	-0.221871	-0.412943	-0.437942	-0.52127	-0.408253	-0.293376	-0.344246	-0.274163	-0.400694
204853_at	NM_006190	4999	ORC2L	origin recognition complex, subunit 2-like (yeast)	0.540866	0.739237	0.593855	0.439321	0.0887297	0.298358	-0.0543484	0.104788	-0.0784655	-0.0304578	-0.0181812	-0.0895933	-0.388319	-0.466158	-0.301096	-0.299174	-0.367689	-0.711673
218538_s_at	NM_020662	57380	MRS2	MRS2 magnesium homeostasis factor homolog (S. cerevisiae)	0.593392	1.10511	0.955402	0.349885	-0.182547	0.42145	0.0138461	-0.173031	-0.229301	-0.393408	-0.229301	-0.354107	-0.0215277	-0.581566	-0.344666	-0.344093	-0.111277	-0.474258
206429_at	NM_005242	2150	F2RL1	coagulation factor II (thrombin) receptor-like 1	0.858456	0.950661	0.86923	0.359887	-0.0292711	-0.0740738	-0.0672649	-0.0732992	-0.0421409	-0.0783707	-0.34077	-0.413911	-0.506253	-0.0418042	-0.28912	-0.418821	-0.354183	-0.30895
210381_s_at	BC000740	887	CCKBR	cholecystokinin B receptor	1.09682	0.817763	0.983034	-0.10588	0.0503762	0.0269713	-0.124281	0.0180869	-0.302751	0.0967415	-0.140614	-0.221983	-0.367417	-0.327543	-0.302094	-0.525706	-0.356675	-0.31485
203074_at	NM_001630	244	ANXA8L2	annexin A8-like 2	0.619664	0.776132	0.456179	0.0778916	0.220732	0.394145	0.247216	0.0418797	0.0191673	-0.0275496	-0.161041	-0.229299	-0.354782	-0.391628	-0.202883	-0.504155	-0.632845	-0.348823
217057_s_at	AF107846	NaN	NA	NA	0.802752	1.12728	0.788499	0.188342	-0.0172365	-0.0627847	0.0207676	-0.172961	-0.306081	-0.0233012	-0.0208847	-0.255671	-0.228612	-0.206096	-0.158416	-0.465419	-0.393017	-0.617157
205206_at	NM_000216	3730	KAL1	Kallmann syndrome 1 sequence	0.873982	1.11367	1.18516	0.431532	0.144167	-0.105122	-0.0553466	-0.576458	-0.374458	-0.60396	-0.318133	-0.180098	-0.127842	-0.281501	-0.368801	-0.258531	-0.246554	-0.251708
200791_s_at	NM_003870	8826	IQGAP1	IQ motif containing GTPase activating protein 1	0.707707	0.802108	0.729025	0.334748	0.21543	0.0601327	0.0880297	0.0583281	-0.285515	0.00363284	-0.124549	-0.31291	-0.329762	-0.542508	-0.497028	-0.330156	-0.486992	-0.0897225
202272_s_at	NM_015176	23219	FBXO28	F-box protein 28	0.755135	0.888251	0.869355	0.34027	-0.0572099	0.211178	0.0616979	-0.14247	-0.0830809	-0.238922	-0.327097	-0.28188	-0.304308	-0.451195	-0.306451	-0.353924	-0.228551	-0.350798
219388_at	NM_024915	79977	GRHL2	grainyhead-like 2 (Drosophila)	0.728501	0.701811	0.536028	0.322937	0.134316	0.441773	-0.0274519	-0.13678	-0.0244631	-0.0693015	-0.057134	-0.223514	-0.443338	-0.273314	-0.179971	-0.291703	-0.633121	-0.505275
208248_x_at	NM_001642	334	APLP2	amyloid beta (A4) precursor-like protein 2	0.521236	0.642135	0.592521	0.414468	0.30927	0.330165	0.161307	0.0646128	-0.073163	-0.120954	-0.0559618	-0.398254	-0.462099	-0.5684	-0.430125	-0.339384	-0.295319	-0.292054
212568_s_at	BF978872	1737	DLAT	dihydrolipoamide S-acetyltransferase	0.621591	0.52805	0.631746	0.487319	-0.00543159	0.31519	0.204898	0.277291	-0.0555615	-0.227652	-0.3686	0.00932365	-0.505215	-0.571565	-0.209272	-0.445881	-0.400004	-0.286227
209209_s_at	AW469573	10979	FERMT2	fermitin family homolog 2 (Drosophila)	0.50203	0.784071	0.424447	0.635596	0.389098	0.249962	0.223426	-0.0904997	-0.18741	-0.466917	-0.337311	0.062164	-0.115992	-0.51854	-0.411077	-0.212771	-0.474337	-0.455937
213503_x_at	BE908217	302	ANXA2	annexin A2	0.820342	0.771348	0.800789	0.329652	0.315649	0.275402	0.100896	-0.0833999	-0.170146	-0.475304	-0.370799	-0.537829	-0.360061	-0.364113	-0.442819	-0.216281	-0.0896902	-0.303638
202598_at	NM_005979	6284	S100A13	S100 calcium binding protein A13	0.6329	0.524249	0.657876	0.337246	0.503268	0.300818	0.0508589	-0.156131	-0.0521029	-0.190221	-0.0480321	-0.266786	-0.353653	-0.300766	-0.542665	-0.299995	-0.396597	-0.400267
214214_s_at	AU151801	708	C1QBP	complement component 1, q subcomponent binding protein	0.631699	0.55823	0.478379	0.434633	0.215764	0.430083	0.220491	0.164762	-0.199565	-0.282746	-0.261838	-0.0217494	-0.272514	-0.758707	-0.213758	-0.270191	-0.327116	-0.525856
219869_s_at	NM_022154	64116	SLC39A8	solute carrier family 39 (zinc transporter), member 8	0.666487	0.990338	0.85172	0.630381	0.237176	0.362846	-0.204211	-0.263187	-0.257577	-0.854133	-0.718123	0.068345	-0.347809	0.0540578	-0.545191	-0.347951	-0.0303945	-0.292775
201573_s_at	M75715	2107	ETF1	eukaryotic translation termination factor 1	0.589509	0.648458	0.543113	0.588877	0.103747	0.335547	0.129128	-0.0916931	-0.191868	-0.15181	-0.176464	0.0343294	-0.324906	-0.449883	-0.461231	-0.366705	-0.445132	-0.313016
221881_s_at	AI638420	25932	CLIC4	chloride intracellular channel 4	0.692101	0.731182	0.698987	0.265959	0.192945	0.218808	0.0555166	-0.193828	-0.177735	-0.072835	-0.0769982	-0.0685205	-0.332862	-0.371843	-0.240556	-0.46922	-0.430305	-0.420797
209027_s_at	BF673013	10006	ABI1	abl-interactor 1	0.675176	0.746895	0.628644	0.231774	0.168627	0.329023	0.100609	-0.111965	-0.0801883	-0.127235	-0.0967083	-0.196447	-0.143996	-0.588879	-0.462928	-0.49881	-0.17215	-0.401441
221452_s_at	NM_030969	81853	TMEM14B	transmembrane protein 14B	0.608106	0.625863	0.484837	0.410224	0.169826	0.426261	0.154962	-0.050416	-0.0411863	-0.168264	-0.370695	-0.0195056	-0.396587	-0.253052	-0.270035	-0.410638	-0.472039	-0.427662
221958_s_at	AA775681	79971	GPR177	G protein-coupled receptor 177	0.643096	0.686823	0.566251	0.474839	0.163524	0.383687	0.0323324	-0.107338	-0.0897178	-0.195017	-0.245116	-0.084178	-0.326019	-0.551225	-0.388982	-0.427761	-0.259733	-0.275466
202790_at	NM_001307	1366	CLDN7	claudin 7	0.516614	0.47635	0.572692	0.526665	0.241573	0.446078	0.101728	-0.238939	-0.322504	0.243892	-0.0916279	-0.151018	-0.304079	-0.317064	-0.160518	-0.515559	-0.65257	-0.371712
218885_s_at	NM_024642	79695	GALNT12	UDP-N-acetyl-alpha-D-galactosamine:polypeptide N-acetylgalactosaminyltransferase 12 (GalNAc-T12)	0.40457	0.86672	0.833524	0.26565	-0.0192015	0.562285	-0.034255	0.0867642	-0.135338	-0.227546	-0.158129	-0.416401	-0.38912	-0.409303	-0.240355	-0.307007	-0.311631	-0.371225
218096_at	NM_018361	55326	AGPAT5	1-acylglycerol-3-phosphate O-acyltransferase 5 (lysophosphatidic acid acyltransferase, epsilon)	0.751305	0.808538	0.771624	0.473441	-0.115038	0.120429	-0.0107844	0.0311332	-0.184052	-0.184706	-0.217947	-0.229948	-0.335309	-0.451939	-0.272322	-0.423911	-0.318433	-0.212082
210754_s_at	M79321	4067	LYN	v-yes-1 Yamaguchi sarcoma viral related oncogene homolog	0.916649	0.890084	0.867878	0.255158	-0.0784819	0.231694	-0.264564	-0.171004	-0.0664955	-0.220478	-0.315938	-0.266045	-0.333704	-0.221393	-0.267393	-0.22386	-0.398878	-0.333229
216442_x_at	AK026737	2335	FN1	fibronectin 1	0.54178	0.661214	0.691189	0.447162	0.227288	0.377202	0.295527	0.0713088	-0.0839266	-0.399808	-0.626946	-0.380485	-0.471272	-0.437808	-0.392613	-0.389714	-0.10568	-0.0244187
201590_x_at	NM_004039	302	ANXA2	annexin A2	0.866928	0.740686	0.828917	0.273371	0.357158	0.263044	0.0251053	-0.101573	-0.281759	-0.400893	-0.270349	-0.617038	-0.445189	-0.342747	-0.590833	-0.0637536	0.0205859	-0.261662
220199_s_at	NM_022831	64853	C1orf80	chromosome 1 open reading frame 80	0.438087	0.650758	0.616318	0.289826	0.13669	0.357046	0.272398	0.128335	-0.112071	-0.283102	-0.158616	-0.0311993	-0.536783	-0.399208	-0.220589	-0.417184	-0.392854	-0.337851
221471_at	AW173623	10955	SERINC3	serine incorporator 3	0.773675	0.669353	0.834788	0.328995	0.223704	0.274155	-0.115323	-0.226822	0.0402299	-0.249158	-0.329477	-0.359287	-0.309986	-0.415641	-0.524021	-0.218033	-0.125164	-0.271988
201772_at	NM_015878	51582	AZIN1	antizyme inhibitor 1	0.71707	0.6625	0.748806	0.296851	0.0304731	0.320989	0.0782767	-0.00868145	-0.17072	-0.315569	-0.177816	-0.108437	-0.214379	-0.581553	-0.277922	-0.309633	-0.27713	-0.413125
202704_at	AA675892	10140	TOB1	transducer of ERBB2, 1	0.455427	1.01252	0.644516	0.0763942	0.321996	0.631747	0.156389	-0.232758	-0.184064	-0.228856	-0.336445	-0.452489	-0.356342	-0.442185	-0.47939	-0.203822	0.0289071	-0.411546
203903_s_at	NM_014799	9843	HEPH	hephaestin	0.536149	0.769662	0.529503	0.629125	-0.0637203	0.475455	0.0792509	-0.179068	-0.0913601	-0.145968	-0.290032	-0.167748	-0.601269	-0.462965	-0.127453	-0.241859	-0.135832	-0.511871
210258_at	AF030107	6003	RGS13	regulator of G-protein signaling 13	0.604201	1.18724	0.956389	0.16623	0.0491243	-0.0355603	-0.0274231	-0.195949	-0.174502	-0.305508	-0.275752	-0.23088	-0.273169	-0.369716	-0.183292	-0.302968	-0.351997	-0.236465
206208_at	NM_000717	762	CA4	carbonic anhydrase IV	0.695815	0.949171	0.444389	0.169682	0.326301	0.107566	0.141506	-0.0918086	-0.0680518	-0.180869	-0.0907226	-0.384137	-0.384102	-0.311511	-0.315184	-0.217004	-0.396783	-0.394258
203725_at	NM_001924	1647	GADD45A	growth arrest and DNA-damage-inducible, alpha	0.458068	0.538943	0.483996	0.606521	0.218105	0.548509	0.289197	-0.129719	-0.229277	-0.0599226	-0.426109	-0.17275	-0.251068	-0.670697	-0.432614	-0.281058	-0.198403	-0.291722
207197_at	NM_003413	7547	ZIC3	Zic family member 3 heterotaxy 1 (odd-paired homolog, Drosophila)	1.69025	1.97216	1.84208	0.123733	-0.366514	-0.226902	-0.840125	-0.777577	-0.801072	-0.840125	-1.12256	-0.721474	-0.21405	-0.368718	-0.280942	0.47741	0.0614671	0.392955
209864_at	AB045118	23401	FRAT2	frequently rearranged in advanced T-cell lymphomas 2	0.915104	0.821766	0.557998	0.22943	0.0642978	0.153662	0.0210506	-0.151352	-0.0386696	-0.214297	-0.290997	-0.110042	-0.241516	-0.376589	-0.352345	-0.218585	-0.563992	-0.204924
204224_s_at	NM_000161	2643	GCH1	GTP cyclohydrolase 1 (dopa-responsive dystonia)	0.482038	0.950711	0.842751	0.482852	-0.0168518	0.450031	0.0451725	-0.165356	-0.21459	-0.386553	-0.446901	-0.418628	-0.203908	-0.58524	-0.367295	-0.235136	-0.0349661	-0.178131
220094_s_at	NM_022102	63933	CCDC90A	coiled-coil domain containing 90A	0.559993	0.645342	0.357881	0.407242	0.286534	0.354551	0.149076	0.152936	-0.055235	-0.333508	-0.404606	-0.0241066	-0.228562	-0.530845	-0.358651	-0.265903	-0.328753	-0.383386
210653_s_at	M55575	594	BCKDHB	branched chain keto acid dehydrogenase E1, beta polypeptide (maple syrup urine disease)	0.469093	0.59753	0.538269	0.519542	0.142798	0.350801	0.0303933	0.0741775	-0.120297	-0.0815341	-0.224874	-0.0965609	-0.400161	-0.561446	-0.245096	-0.351568	-0.332462	-0.308602
213379_at	AF091086	27235	COQ2	coenzyme Q2 homolog, prenyltransferase (yeast)	0.835452	0.475714	0.537836	0.503398	0.372099	0.350596	0.093701	-0.0874794	-0.45226	-0.46336	-0.21676	-0.00816672	-0.0890365	-0.633701	-0.353873	-0.126169	-0.411006	-0.326984
266_s_at	L33930	934	CD24	CD24 molecule	0.585216	0.697807	0.534484	0.28259	0.166	0.250627	0.187879	0.0292486	-0.0893366	-0.292867	-0.257892	-0.00643477	-0.334312	-0.476806	-0.0601915	-0.364338	-0.430447	-0.421226
210973_s_at	M63889	2260	FGFR1	fibroblast growth factor receptor 1 (fms-related tyrosine kinase 2, Pfeiffer syndrome)	0.686959	0.568603	0.548197	0.46546	0.33224	0.245249	-0.0357614	0.032135	-0.0360491	-0.262643	-0.316606	-0.396226	-0.173779	-0.432058	-0.306427	-0.217129	-0.28881	-0.413354
206857_s_at	NM_004116	2281	FKBP1B	FK506 binding protein 1B, 12.6 kDa	1.08718	1.05847	0.834957	0.534958	0.201837	0.25064	-0.215485	-0.436276	-0.363262	-0.723676	-0.68783	-0.542607	-0.41882	-0.350823	-0.369298	0.137512	0.0970723	-0.0945494
204437_s_at	NM_016725	2348	FOLR1	folate receptor 1 (adult)	0.651813	0.403352	0.585133	0.459028	0.233589	0.257857	0.013151	0.155419	-0.0828073	-0.0824714	-0.268389	-0.272688	-0.344317	-0.31631	-0.379731	-0.277877	-0.3607	-0.374051
211535_s_at	M60485	2260	FGFR1	fibroblast growth factor receptor 1 (fms-related tyrosine kinase 2, Pfeiffer syndrome)	0.708237	0.63218	0.67602	0.294622	0.269143	0.155357	0.0727265	-0.0200661	-0.0703322	-0.366792	-0.162631	-0.23388	-0.216441	-0.61704	-0.32532	-0.255711	-0.318325	-0.221746
210935_s_at	AF274954	9948	WDR1	WD repeat domain 1	0.621639	0.650179	0.586458	0.155829	0.337936	0.358282	0.0498956	-0.0819995	-0.0763267	-0.385066	-0.131917	-0.046037	-0.158636	-0.345407	-0.386298	-0.522131	-0.195791	-0.430608
211015_s_at	L12723	3308	HSPA4	heat shock 70kDa protein 4	0.715295	0.719202	0.590907	0.320637	0.0566007	0.208321	0.233212	-0.028796	-0.291006	-0.274431	-0.287569	0.073508	-0.201747	-0.593139	-0.329252	-0.34135	-0.174037	-0.396355
219993_at	NM_022454	64321	SOX17	SRY (sex determining region Y)-box 17	0.668046	0.729771	0.731856	0.368964	-0.0013751	0.103374	0.0438648	0.158958	-0.196037	-0.133853	-0.269562	-0.463052	-0.272315	-0.241432	-0.177304	-0.261435	-0.518966	-0.269505
44790_s_at	AI129310	80183	C13orf18	chromosome 13 open reading frame 18	0.870806	0.648734	0.880621	0.354089	0.00884954	0.125912	-0.0673145	-0.227628	-0.138551	-0.237961	-0.236319	-0.209632	-0.345994	-0.264825	-0.318659	-0.229713	-0.284271	-0.328145
203373_at	NM_003877	8835	SOCS2	suppressor of cytokine signaling 2	0.975909	1.08733	1.03709	0.0587151	-0.0256498	0.0317516	-0.133491	-0.219815	-0.260867	-0.46541	-0.515705	-0.14246	-0.37113	-0.173885	-0.398824	-0.163443	-0.0575854	-0.262531
201690_s_at	AA524023	7163	TPD52	tumor protein D52	0.768972	0.778672	0.809933	0.339496	0.045602	0.1902	-0.222951	-0.250381	0.0985121	-0.193668	-0.268844	-0.384643	-0.388228	-0.206561	-0.3417	-0.235885	0.00161316	-0.54014
214581_x_at	BE568134	27242	TNFRSF21	tumor necrosis factor receptor superfamily, member 21	0.800985	0.610893	0.548608	0.316731	-0.046605	0.302341	0.26575	0.203426	-0.132993	-0.321872	-0.386608	-0.263094	-0.136156	-0.662619	-0.366133	-0.323077	-0.147229	-0.262349
216526_x_at	AK024836	3107	HLA-C	major histocompatibility complex, class I, C	0.195502	0.646196	0.612397	0.631218	0.280483	0.461391	0.0787048	-0.244572	0.0627018	-0.264382	-0.490022	-0.172249	-0.548379	-0.228221	0.0705435	-0.289832	-0.364892	-0.436588
218622_at	NM_024057	79023	NUP37	nucleoporin 37kDa	0.667315	0.583556	0.634766	0.269308	0.103148	0.307532	-0.00389881	-0.224204	-0.0702406	-0.0752588	-0.00877125	0.00671054	-0.258231	-0.365424	-0.424709	-0.32607	-0.276778	-0.538751
210102_at	BC001234	4013	LOH11CR2A	loss of heterozygosity, 11, chromosomal region 2, gene A	0.956061	0.736493	0.853556	0.0327319	0.0083601	0.0667642	0.0853314	-0.179148	-0.0489389	-0.284424	-0.100354	-0.444392	-0.171423	-0.155257	-0.447674	-0.341757	-0.174058	-0.391871
209130_at	BC003686	8773	SNAP23	synaptosomal-associated protein, 23kDa	0.646736	0.793242	0.685172	0.368082	0.0277185	0.357068	0.0489473	-0.08405	-0.0514556	-0.404782	-0.451239	-0.220901	-0.207586	-0.703853	-0.269553	-0.0678101	-0.139351	-0.326387
202087_s_at	NM_001912	1514	CTSL1	cathepsin L1	0.832572	0.60486	0.62864	0.240108	0.144313	0.268065	0.090484	-0.282813	0.036175	-0.105543	-0.4031	-0.0524867	-0.567765	-0.412385	-0.460216	-0.151561	-0.2182	-0.191149
212464_s_at	X02761	2335	FN1	fibronectin 1	0.486091	0.654285	0.651181	0.440615	0.268632	0.286239	0.24504	0.0741762	-0.0855978	-0.46692	-0.540355	-0.348127	-0.378491	-0.429899	-0.422366	-0.0497528	-0.112236	-0.272517
202732_at	NM_007066	11142	PKIG	protein kinase (cAMP-dependent, catalytic) inhibitor gamma	0.491901	0.533836	0.513194	0.33322	0.524724	0.361074	0.0709232	-0.113929	-0.156913	-0.17579	-0.317068	-0.142604	-0.352223	-0.27019	-0.300797	-0.362451	-0.341628	-0.295281
211719_x_at	BC005858	2335	FN1	fibronectin 1	0.839869	0.69662	0.781513	0.268123	0.140893	0.314392	0.18891	-0.0981646	-0.376519	-0.300846	-0.338836	-0.473222	-0.49021	-0.54073	-0.52385	0.00743762	-0.0922488	-0.00313026
209781_s_at	AF069681	10656	KHDRBS3	KH domain containing, RNA binding, signal transduction associated 3	0.631955	0.506808	0.617236	0.353046	0.362615	0.491863	0.124658	-0.0203567	-0.242117	-0.525286	-0.274635	-0.261076	-0.323017	-0.480517	-0.356714	-0.0683322	-0.221524	-0.314608
203814_s_at	NM_000904	4835	NQO2	NAD(P)H dehydrogenase, quinone 2	0.708933	0.702054	0.601293	0.492776	0.242754	0.483	-0.045949	-0.22448	-0.537767	-0.505937	-0.252571	0.0251797	-0.388813	-0.286561	-0.232346	-0.369926	-0.257898	-0.153741
201850_at	NM_001747	822	CAPG	capping protein (actin filament), gelsolin-like	0.507464	0.618995	0.497999	0.429976	0.526501	0.371124	-0.0319271	-0.262644	-0.0595335	-0.0783435	-0.423045	-0.372789	-0.388252	-0.528691	-0.0599818	-0.185929	-0.209286	-0.351639
211267_at	U82811	8820	HESX1	HESX homeobox 1	0.516628	0.444054	0.495737	0.740926	0.307312	0.110003	-0.0949957	-0.0181772	-0.131644	-0.137708	-0.036056	-0.286892	-0.313725	-0.176199	-0.334499	-0.313122	-0.397179	-0.374462
202647_s_at	NM_002524	4893	NRAS	neuroblastoma RAS viral (v-ras) oncogene homolog	0.369198	0.624813	0.646804	0.359346	0.242753	0.420908	0.0632445	0.0339435	-0.101595	-0.313287	-0.370655	-0.165202	-0.21814	-0.382243	-0.344133	-0.131222	-0.384749	-0.349783
205968_at	NM_002252	3790	KCNS3	potassium voltage-gated channel, delayed-rectifier, subfamily S, member 3	0.347427	0.346131	0.818053	0.443095	0.46127	0.313042	-0.0746399	-0.0272925	-0.120003	-0.27454	-0.303763	-0.0414516	-0.26847	-0.29414	-0.309511	-0.335531	-0.350876	-0.328799
217763_s_at	NM_006868	11031	RAB31	RAB31, member RAS oncogene family	0.555736	0.728536	0.590171	0.398143	0.102825	0.444377	-0.0753661	-0.154807	-0.19924	-0.173914	-0.313185	-0.0881864	-0.228563	-0.387472	-0.376812	-0.297056	-0.413548	-0.111639
204602_at	NM_012242	22943	DKK1	dickkopf homolog 1 (Xenopus laevis)	0.556769	0.691506	0.685722	0.39573	-0.0273334	0.260408	0.0209473	0.109646	-0.18427	-0.206025	-0.249912	-0.309308	-0.193471	-0.444488	-0.215348	-0.239508	-0.435823	-0.215242
203988_s_at	NM_004480	2530	FUT8	fucosyltransferase 8 (alpha (1,6) fucosyltransferase)	0.610615	0.737047	0.810172	0.38554	0.164018	0.350601	-0.0400002	-0.165151	-0.285314	-0.281875	-0.371711	-0.393202	-0.440189	-0.348098	-0.290772	-0.136537	-0.207048	-0.098094
217388_s_at	D55639	8942	KYNU	kynureninase (L-kynurenine hydrolase)	0.67958	0.455311	0.814919	0.438423	0.275271	0.143586	0.0489543	-0.163046	-0.229724	-0.0753286	-0.33337	-0.499145	-0.225179	-0.304614	-0.311243	-0.393444	-0.12512	-0.195832
[truncated: 1,773 more rows]
